# Supplementary material for: Health-related preferences of older patients with multimorbidity: an evidence map
Source: PubMed Central journal article supplement — BMJ Open. 2019 Dec 15;9(12):e034485. doi: 10.1136/bmjopen-2019-034485 (PMC6924802; doi:10.1136/bmjopen-2019-034485), 2019-12-15
Supplement: bmjopen-2019-034485.draft_revisions.pdf [file bmjopen-2019-034485.draft_revisions.pdf]

# BMJ Open

BMJ Open is committed to open peer review. As part of this commitment we make the peer review history of every article we publish publicly available.

When an article is published we post the peer reviewers' comments and the authors' responses online. We also post the versions of the paper that were used during peer review. These are the versions that the peer review comments apply to.

The versions of the paper that follow are the versions that were submitted during the peer review process. They are not the versions of record or the final published versions. They should not be cited or distributed as the published version of this manuscript.

BMJ Open is an open access journal and the full, final, typeset and author-corrected version of record of the manuscript is available on our site with no access controls, subscription charges or pay-per-view fees (<http://bmjopen.bmj.com>).

If you have any questions on BMJ Open's open peer review process please email [info.bmjopen@bmj.com](mailto:info.bmjopen@bmj.com)

# BMJ Open

## Health-related preferences of older patients with multimorbidity: an evidence map.

|                               |                                                                                                                                                                                                                                                                                                                                                                                                                                                                                                                                                                                                                                                                                                                                                                                                                                                                                                                                                                                                                                                                                                                                                                                                                                                                                                                                                                                                                                                                                                                                                                                                                                                                                                                                                                                                                                                                                                                                                                                                                                                                 |
|-------------------------------|-----------------------------------------------------------------------------------------------------------------------------------------------------------------------------------------------------------------------------------------------------------------------------------------------------------------------------------------------------------------------------------------------------------------------------------------------------------------------------------------------------------------------------------------------------------------------------------------------------------------------------------------------------------------------------------------------------------------------------------------------------------------------------------------------------------------------------------------------------------------------------------------------------------------------------------------------------------------------------------------------------------------------------------------------------------------------------------------------------------------------------------------------------------------------------------------------------------------------------------------------------------------------------------------------------------------------------------------------------------------------------------------------------------------------------------------------------------------------------------------------------------------------------------------------------------------------------------------------------------------------------------------------------------------------------------------------------------------------------------------------------------------------------------------------------------------------------------------------------------------------------------------------------------------------------------------------------------------------------------------------------------------------------------------------------------------|
| Journal:                      | <i>BMJ Open</i>                                                                                                                                                                                                                                                                                                                                                                                                                                                                                                                                                                                                                                                                                                                                                                                                                                                                                                                                                                                                                                                                                                                                                                                                                                                                                                                                                                                                                                                                                                                                                                                                                                                                                                                                                                                                                                                                                                                                                                                                                                                 |
| Manuscript ID                 | bmjopen-2019-034485                                                                                                                                                                                                                                                                                                                                                                                                                                                                                                                                                                                                                                                                                                                                                                                                                                                                                                                                                                                                                                                                                                                                                                                                                                                                                                                                                                                                                                                                                                                                                                                                                                                                                                                                                                                                                                                                                                                                                                                                                                             |
| Article Type:                 | Original research                                                                                                                                                                                                                                                                                                                                                                                                                                                                                                                                                                                                                                                                                                                                                                                                                                                                                                                                                                                                                                                                                                                                                                                                                                                                                                                                                                                                                                                                                                                                                                                                                                                                                                                                                                                                                                                                                                                                                                                                                                               |
| Date Submitted by the Author: | 22-Sep-2019                                                                                                                                                                                                                                                                                                                                                                                                                                                                                                                                                                                                                                                                                                                                                                                                                                                                                                                                                                                                                                                                                                                                                                                                                                                                                                                                                                                                                                                                                                                                                                                                                                                                                                                                                                                                                                                                                                                                                                                                                                                     |
| Complete List of Authors:     | <p>GONZALEZ, ANA; Johann Wolfgang Goethe-Universität Frankfurt am Main, Institute of General Medicine; Red de Investigación en Servicios de Salud en Enfermedades Crónicas</p> <p>Schmucker, Christine; University of Freiburg Faculty of Medicine, Institute for Evidence in Medicine (for Cochrane Germany Foundation), Medical Center - University of Freiburg</p> <p>Nothacker, Julia; University of Freiburg Faculty of Medicine, Institute for Evidence in Medicine (for Cochrane Germany Foundation), Medical Center - University of Freiburg</p> <p>Motschall, Edith ; University of Freiburg Faculty of Medicine, Institute of Medical Biometry and Statistics</p> <p>Nguyen, Truc; Johann Wolfgang Goethe-Universität Frankfurt am Main, Institute of General Practice</p> <p>Brueckle, Maria-Sophie; Johann Wolfgang Goethe-Universität Frankfurt am Main, Institut of General Practice</p> <p>Blom, Jeanet; Leiden University Medical Center, Department of Public Health and Primary Care</p> <p>van den Akker, Marjan; Johann Wolfgang Goethe-Universität Frankfurt am Main, Institute of General Practice; Maastricht University, Department of Family Medicine, Care and Public Health Research Institute (CAPHRI)</p> <p>Röttger, Kristian; Gemeinsamer Bundesausschuss, Patient representative, Federal Joint Committee</p> <p>Wegwarth, Odette; Max-Planck-Institute for Human Development, Center for Adaptative Rationality</p> <p>Hoffmann, Tammy; Bond University Faculty of Health Sciences and Medicine, Institute for Evidence-Based Healthcare</p> <p>Straus, Sharon; University of Toronto, Department of Medicine</p> <p>Gerlach, Ferdinand; Johann Wolfgang Goethe-Universität Frankfurt am Main, Institute of General Medicine</p> <p>Meerpohl, Joerg; University of Freiburg Faculty of Medicine, Institute for Evidence in Medicine (for Cochrane Germany Foundation), Medical Center - University of Freiburg</p> <p>Muth, Christiane; Johann Wolfgang Goethe-Universität Frankfurt am Main, Institut of General Practice</p> |
| Keywords:                     | GENERAL MEDICINE (see Internal Medicine), GERIATRIC MEDICINE, INTERNAL MEDICINE                                                                                                                                                                                                                                                                                                                                                                                                                                                                                                                                                                                                                                                                                                                                                                                                                                                                                                                                                                                                                                                                                                                                                                                                                                                                                                                                                                                                                                                                                                                                                                                                                                                                                                                                                                                                                                                                                                                                                                                 |
|                               |                                                                                                                                                                                                                                                                                                                                                                                                                                                                                                                                                                                                                                                                                                                                                                                                                                                                                                                                                                                                                                                                                                                                                                                                                                                                                                                                                                                                                                                                                                                                                                                                                                                                                                                                                                                                                                                                                                                                                                                                                                                                 |

1  
2  
3  
4  
5  
6  
7  
8  
9  
10  
11  
12  
13  
14  
15  
16  
17  
18  
19  
20  
21  
22  
23  
24  
25  
26  
27  
28  
29  
30  
31  
32  
33  
34  
35  
36  
37  
38  
39  
40  
41  
42  
43  
44  
45  
46  
47  
48  
49  
50  
51  
52  
53  
54  
55  
56  
57  
58  
59  
60

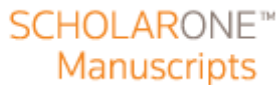

1  
2  
3 1 **TITLE**  
4

5 2 Health-related preferences of older patients with multimorbidity: an evidence map.  
6  
7  
8 3

9  
10 4 **AUTHORS**  
11

12 5 Ana I. González González\*

13  
14 6 Institute of General Practice, Johann Wolfgang Goethe University, Frankfurt / Main, GERMANY.

15  
16 7 Red de Investigación en Servicios de Salud en Enfermedades Crónicas (REDISSEC), Madrid,  
17  
18 8 SPAIN.

19  
20  
21 9 Email: [GonzalezGonzalez@allgemeinmedizin.uni-frankfurt.de](mailto:GonzalezGonzalez@allgemeinmedizin.uni-frankfurt.de)  
22

23 10 Corresponding author  
24

25 11

26  
27 12 Christine Schmucker\*

28  
29 13 Institute for Evidence in Medicine (for Cochrane Germany Foundation), Medical Center-

30  
31 14 University of Freiburg, Faculty of Medicine, University of Freiburg, Freiburg, GERMANY.

32  
33 15 Email: [schmucker@ifem.uni-freiburg.de](mailto:schmucker@ifem.uni-freiburg.de)  
34  
35 16

36  
37 16

38  
39 17 Julia Nothacker

40  
41 18 Institute for Evidence in Medicine (for Cochrane Germany Foundation), Medical Center-

42  
43 19 University of Freiburg, Faculty of Medicine, University of Freiburg, Freiburg, GERMANY.

44  
45 20 Email: [nothacker@cochrane.de](mailto:nothacker@cochrane.de)  
46  
47 21

48  
49 21

50 22 Edith Motschall

51  
52 23 Institute of Medical Biometry and Statistics, Faculty of Medicine, University of Freiburg,

53  
54 24 Freiburg, GERMANY.

55  
56 25 Email: [motschall@imbi.uni-freiburg.de](mailto:motschall@imbi.uni-freiburg.de)  
57  
58 26

59  
60

- 1  
2  
3 27 Truc Sophia Nguyen  
4  
5 28 Institute of General Practice, Johann Wolfgang Goethe University, Frankfurt / Main, GERMANY.  
6  
7 29 Email: [Nguyen@allgemeinmedizin.uni-frankfurt.de](mailto:Nguyen@allgemeinmedizin.uni-frankfurt.de)  
8  
9  
10 30  
11  
12 31 Maria-Sophie Brueckle  
13  
14 32 Institute of General Practice, Johann Wolfgang Goethe University, Frankfurt / Main, GERMANY.  
15  
16 33 Email: [brueckle@allgemeinmedizin.uni-frankfurt.de](mailto:brueckle@allgemeinmedizin.uni-frankfurt.de)  
17  
18  
19 34  
20  
21 35 Jeanet W. Blom  
22  
23 36 Department of Public Health and Primary Care, Leiden University Medical Center, Leiden, THE  
24  
25 37 NETHERLANDS.  
26  
27 38 Email: [J.W.Blom@lumc.nl](mailto:J.W.Blom@lumc.nl)  
28  
29  
30 39  
31  
32 40 Marjan van den Akker  
33  
34 41 Institute of General Practice, Johann Wolfgang Goethe University, Frankfurt / Main, GERMANY.  
35  
36 42 Department of Family Medicine, Care and Public Health Research Institute (CAPHRI), Maastricht  
37  
38 University, Maastricht, THE NETHERLANDS.  
39  
40 43  
41 44 Email: [m.vandenAkker@allgemeinmedizin.uni-frankfurt.de](mailto:m.vandenAkker@allgemeinmedizin.uni-frankfurt.de)  
42  
43  
44 45  
45  
46 46 Kristian Röttger  
47  
48 47 Patient representative, Federal Joint Committee “Gemeinsamer Bundesausschuss”, Berlin.  
49  
50 48 GERMANY.  
51  
52 49 Email: [kristianroettger@aol.de](mailto:kristianroettger@aol.de)  
53  
54  
55 50  
56  
57 51 Odette Wegwarth  
58  
59  
60

1  
2  
3 52 Center for Adaptive Rationality, Max Planck-Institute for Human Development, Berlin,  
4  
5 53 GERMANY.

6  
7 54 Email: [wegwarth@mpib-berlin.mpg.de](mailto:wegwarth@mpib-berlin.mpg.de)  
8  
9

10 55

11  
12 56 Tammy Hoffmann

13  
14 57 Institute for Evidence-Based Healthcare, Faculty of Health Sciences and Medicine, Bond  
15  
16 58 University, Gold Coast, AUSTRALIA.

17  
18 59 Email: [thoffman@bond.edu.au](mailto:thoffman@bond.edu.au)  
19  
20

21 60

22  
23 61 Sharon E. Straus

24  
25 62 Department of Medicine, University of Toronto, CANADA.

26  
27 63 Email: [sharon.straus@utoronto.ca](mailto:sharon.straus@utoronto.ca)  
28  
29

30 64

31  
32 65 Ferdinand M. Gerlach

33  
34 66 Institute of General Practice, Johann Wolfgang Goethe University, Frankfurt / Main, GERMANY.

35  
36 67 Email: [gerlach@allgemeinmedizin.uni-frankfurt.de](mailto:gerlach@allgemeinmedizin.uni-frankfurt.de)  
37  
38

39 68

40  
41 69 Joerg J. Meerpohl\*\*

42  
43 70 Institute for Evidence in Medicine (for Cochrane Germany Foundation), Medical Center-

44  
45 71 University of Freiburg, Faculty of Medicine, University of Freiburg, Freiburg, GERMANY.

46  
47 72 Email: [meerpohl@ifem.uni-freiburg.de](mailto:meerpohl@ifem.uni-freiburg.de)  
48  
49

50 73

51  
52 74 Christiane Muth\*\*

53  
54 75 Institute of General Practice, Johann Wolfgang Goethe University, Frankfurt / Main, GERMANY.

55  
56 76 Email: [muth@allgemeinmedizin.uni-frankfurt.de](mailto:muth@allgemeinmedizin.uni-frankfurt.de)  
57  
58

59 77  
60

1  
2  
3  
4  
5  
6  
7  
8  
9  
10  
11  
12  
13  
14  
15  
16  
17  
18  
19  
20  
21  
22  
23  
24  
25  
26  
27  
28  
29  
30  
31  
32  
33  
34  
35  
36  
37  
38  
39  
40  
41  
42  
43  
44  
45  
46  
47  
48  
49  
50  
51  
52  
53  
54  
55  
56  
57  
58  
59  
60

78 \*both authors contributed equally

79 \*\*both authors contributed equally

For peer review only

1  
2  
3 81 **ABSTRACT**  
4

5 82 **Objectives:** To systematically identify knowledge clusters and research gaps in the health-  
6  
7 83 related preferences of older patients with multimorbidity by mapping current evidence.  
8

9  
10 84 **Design:** Evidence map.  
11

12 85 **Data sources:** MEDLINE, EMBASE, PsycINFO, PSYINDEX, CINAHL and Science Citation  
13  
14 86 Index/Social Science Citation Index/-Expanded from inception to April 2018.  
15

16 87 **Study selection:** Studies reporting primary research on health-related preferences of older  
17  
18 88 patients (mean age  $\geq 60$  years) with multimorbidity ( $\geq 2$  chronic/acute conditions).  
19

20  
21 89 **Data extraction:** Two independent reviewers assessed studies for eligibility, extracted data  
22  
23 90 and clustered the studies using MAXQDA-18<sup>®</sup> content analysis software.  
24

25 91 **Results:** We included 152 studies (79% studies from US/UK/CAN/AUS&NZ) (57,093 patients).  
26

27 92 All used an observational design except for one interventional study: 63 (41%) were qualitative  
28

29  
30 93 (59, cross-sectional, 4 longitudinal), 85 (57%) quantitative (63 cross-sectional, 22 longitudinal),  
31

32 94 and 3 (2%) used mixed methods. The setting was specialised care in 85 (56%) and primary care  
33

34 95 in 54 (36%) studies. We identified seven clusters of studies on preferences: end-of-life care  
35

36 96 (n=51, 34%), self-management (n=34, 22%), treatment (n=32, 21%), involvement in shared  
37

38 97 decision making (n=25, 17%), health outcome prioritisation/goal setting (n=19, 13%),  
39

40 98 healthcare service (n=12, 8%) and screening/diagnostic testing (n= 1, 1%). Terminology (e.g.  
41

42 99 preferences, views, perspectives), and concepts (e.g. trade-offs, decision regret, goal setting)  
43

44 100 used to describe health-related preferences varied substantially between studies.  
45

46  
47 101 **Conclusion:** Our study provided the first evidence map on the preferences of older patients  
48

49 102 with multimorbidity. Included studies were mostly conducted in developed countries and  
50

51 103 covered a broad range of issues. Evidence on patient preferences concerning decision-making  
52

53 104 on screening and diagnostic testing was scarce. Differences in employed terminology, decision-  
54

55 105 making components and concepts, as well as the sparsity of intervention studies, are  
56  
57  
58  
59  
60



1  
2  
3  
4  
5  
6  
7  
8  
9  
10  
11  
12  
13  
14  
15  
16  
17  
18  
19  
20  
21  
22  
23  
24  
25  
26  
27  
28  
29  
30  
31  
32  
33  
34  
35  
36  
37  
38  
39  
40  
41  
42  
43  
44  
45  
46  
47  
48  
49  
50  
51  
52  
53  
54  
55  
56  
57  
58  
59  
60

106 challenges for future research into evidence-based decision support seeking to elicit the  
107 preferences of older patients with multimorbidity and help them construct preferences.  
108 **Registration:**  
109 Open Science Framework (OSF): DOI 10.17605/OSF.IO/MCRWQ.

For peer review only

1  
2  
3 110 **Strengths and limitations of this study**  
4  
5

- 6 111 • This evidence map presents a systematic overview of studies addressing a variety of  
7  
8 112 health-related preferences in older patients with multimorbidity.  
9  
10  
11  
12 113 • We identified clusters of studies on, for example, health outcome prioritisation and end-  
13  
14 114 of-life care preferences; few studies addressed preference-sensitive decisions on screening  
15  
16 115 and diagnostic testing.  
17  
18  
19  
20 116 • The terminology and concepts used to address health-related preferences varied  
21  
22 117 considerably in the included studies, highlighting a need for more standardisation to  
23  
24 118 improve further research.  
25  
26  
27  
28  
29  
30  
31  
32  
33  
34  
35  
36  
37  
38  
39  
40  
41  
42  
43  
44  
45  
46  
47  
48  
49  
50  
51  
52  
53  
54  
55  
56  
57  
58  
59  
60

## 119 INTRODUCTION

120 Multimorbidity, defined as the co-occurrence of medical conditions in a person (1), is a  
121 growing public health concern that affects approximately two-thirds of people over the age of  
122 60 years (2,3). Patients with multimorbidity generally experience a higher burden of disease,  
123 physical disabilities, adverse drug reactions, more frequent hospital admissions, reduced  
124 quality of life, and increased mortality compared to those with a single condition (4,5). As  
125 patients face new and growing demands to organise and coordinate their own care to comply  
126 with treatment regimens, multiple chronic conditions are often associated with high treatment  
127 burden in addition to the burden of the diseases themselves. (6). If patients are overwhelmed  
128 by the burden, they limit their compliance to their preferred tasks (7). Moreover, the care of  
129 patients with multimorbidity is challenging, as treatments for one condition may adversely  
130 affect another (8). Robust evidence supporting decision-making in these patients is scarce (2),  
131 and the use of multiple disease-based guidelines is inappropriate, as they do not adequately  
132 consider potentially interacting conditions and treatments (9,10).

133 The delivery of health care in patients with multimorbidity requires a patient-centred  
134 approach, that is *“respectful of and responsive to individual patient preferences, needs, and  
135 values, and ensuring that patient values guide all clinical decisions”* (11). The *“Ariadne  
136 principles”* (12) stress the importance of physicians and patients sharing realistic treatment  
137 goals, and of individualising management and follow-up by taking patients’ preferences into  
138 consideration when making clinical decisions. Recent clinical guidelines on multimorbidity have  
139 embraced this approach and emphasise the incorporation of patients’ preferences in clinical  
140 decision-making, for example in the selection of appropriate self-management activities and  
141 treatment options, as well as in the prioritisation of health outcomes (13). Similarly, the  
142 consideration of patients' views in the form of patient-reported experiences and care  
143 outcomes have been recognised as critical to the achievement of high-performing health  
144 systems that are responsive to the needs of people with multimorbidity (14).

1  
2  
3 145 It remains unclear how health-related preferences can be elicited from older patients with  
4  
5 146 multimorbidity, as patients may be unfamiliar with the decision elements (15). Moreover,  
6  
7 147 concerns have been raised that patients are often provided with too little information about  
8  
9 148 the benefits and harms of a treatment (16,17), may find it difficult to prioritise health  
10  
11 149 outcomes and make trade-offs, and in consequence, may refrain from participating in the  
12  
13 150 decision making process (18). As evidence maps allow a systematic approach to be used to  
14  
15 151 collate evidence on a broad topic, we used this emerging method to map the health-related  
16  
17 152 preferences of older patients with multimorbidity (19). In particular, we aimed to (i)  
18  
19 153 systematically identify and describe key characteristics of research on health-related  
20  
21 154 preferences of older patients with multimorbidity, (ii) display the landscape of existing  
22  
23 155 research in visual formats, (iii) identify evidence clusters to guide any subsequent knowledge  
24  
25 156 synthesis (systematic reviews and meta-analysis), and (iv) identify evidence gaps and  
26  
27 157 encourage relevant stakeholders and funding agencies to prioritise these in future research.  
28  
29  
30  
31  
32  
33

## 34 159 **METHODS**

### 35 160 **Reporting protocol and guideline**

36  
37 161 We have described the methods in a study protocol (20), registered the evidence map in Open  
38  
39 162 Science Framework (OSF, DOI 10.17605/OSF.IO/MCRWQ) and adhered to the 'PRISMA  
40  
41 163 Extension for Scoping Reviews (PRISMA-ScR) checklist (21) where possible (see Supplementary  
42  
43 164 table 1). [About here: link to Supplementary table 1. Preferred Reporting Items for Systematic  
44  
45 165 reviews and Meta-Analyses extension for Scoping Reviews (PRISMA-ScR) Checklist]  
46  
47  
48  
49

50 166

### 51 167 **Systematic literature search**

52  
53 168 We searched the electronic databases MEDLINE and EMBASE (via Wolters Kluwer's search  
54  
55 169 interface Ovid), PsycINFO, PSYINDEX and CINAHL (via EBSCOhost), and Social Science Citation  
56  
57 170 Index and Science Citation Index Expanded (via Web of Science from Clarivate Analytics) from  
58  
59  
60

1  
2  
3 171 inception until April 2018. In our search, we combined medical subject headings (MeSH) with  
4  
5 172 keywords covering old age, multimorbidity, polypharmacy and search terms related to patient  
6  
7 173 preferences. The search strategy was adapted to suit the database under review (see  
8  
9 174 Supplementary table 2 on Search strategy in MEDLINE - Ovid). [About here: link to  
10  
11 175 Supplementary table 2 on Search strategy in MEDLINE (Ovid)]  
12  
13  
14 176 Based on the 32 most relevant studies identified in our initial search (i.e., when keywords  
15  
16 177 provided by the author contained the terms “multimorbidity” and “patient preferences” or  
17  
18 178 “patient priorities” and/ or described a specific method for eliciting patients’ preferences, such  
19  
20 179 as “conjoint analysis”), we also checked the reference lists of included studies (backward  
21  
22 180 citation tracking) and conducted a cited reference search (forward citation tracking) using the  
23  
24 181 Web of Science Core Collection. We checked the reference lists of systematic reviews on  
25  
26 182 related topics for further studies (hand search) and contacted the authors of conference  
27  
28 183 proceedings that had not published a full set of results. We searched for ongoing trials in the  
29  
30 184 Register for Clinical Trials (22) and the WHO International Clinical Trials Registry (23).  
31  
32  
33  
34  
35

185

### 186 **Inclusion and exclusion criteria**

37  
38  
39 187 We included qualitative and quantitative studies involving older patients of 60 years and older  
40  
41 188 with multimorbidity (two or more simultaneous chronic or acute conditions (1)) that  
42  
43 189 addressed health-related patient preferences. We also included studies involving older  
44  
45 190 patients with chronic conditions that are frequently associated with multimorbidity, even if  
46  
47 191 they were not reported in detail (chronic heart failure (CHF), chronic obstructive pulmonary  
48  
49 192 disease (COPD), chronic kidney disease (CKD), advanced cancer and frailty) (24–26).  
50  
51  
52 193 We excluded studies investigating preferences relating to interventions of limited availability  
53  
54 194 or whose legal status was unclear (e.g. euthanasia, which is not legal or available in most  
55  
56 195 countries), studies addressing the preferences of caregivers, family, or medical and/or other  
57  
58  
59  
60

1  
2  
3 196 professionals as well as case reports, narrative reviews and editorials. We did not apply any  
4  
5 197 restrictions to the geographical location of the study or language of publication.  
6

7  
8 198

9  
10 199 **Study selection**

11  
12 200 Two reviewers (AIG, JN) screened the titles and abstracts of all references identified by  
13  
14 201 electronic searches following a calibration exercise. We obtained full texts of potentially  
15  
16 202 relevant articles, and two reviewers (AIG, JN or CS) independently assessed these for inclusion.  
17  
18 203 Conflicts were resolved by discussion among reviewers.  
19

20  
21 204

22  
23 205 **Mapping the evidence**

24  
25 206 *(i) Data extraction:* Following the calibration of five full text articles, two reviewers (AIG, JN or  
26  
27 207 CS) independently extracted data on (1) study characteristics including study design  
28  
29 208 (observational [qualitative, quantitative or mixed-methods, cross-sectional or longitudinal] and  
30  
31 209 interventional), geographical area, study setting (e.g., primary care), sample size, (2) study aim,  
32  
33 210 (3) patient population (e.g., definition of multimorbidity, age, sex) and, (4) characteristics of  
34  
35 211 preferences, such as methods used to elucidate patients' preferences, and definition of  
36  
37 212 preferences according to the authors.  
38  
39

40  
41 213 *(ii) Types of preference:* We conducted content synthesis analysis (27) to derive overarching  
42  
43 214 themes. The analysis was based on coding by two independent reviewers (AIG, JN or CS) using  
44  
45 215 MAXQDA-18<sup>®</sup>, which were further scrutinised by CM, JWB, MvdA, TSN and MSB (20). The  
46  
47 216 initial step was to scrutinise title and abstract (focusing on the study aim) of the included  
48  
49 217 studies to gain a general understanding of what the study was about. The full text was then  
50  
51 218 read and re-read and codes assigned (e.g. resuscitation preferences (28)), which were later  
52  
53 219 grouped according to overarching themes (e.g. life-sustaining treatment preferences (28))  
54  
55 220 (27). Reviewers' categorisation of preference types was partly based on a previous  
56  
57 221 classification (i.e. end-of-life preferences, prioritisation of health problems, prioritisation of  
58  
59  
60

1  
2  
3 222 medication, preferences regarding the role played in decision-making, preferences in surgical  
4  
5 223 treatment methods, prioritisation of treatment goals, determinants of preference, changes in  
6  
7 224 preferences and preferences concerning the organisation of health care) obtained from a pilot  
8  
9 225 study (published elsewhere) of the evidence map.

11 226 *(iii) Mapping:* We tabulated the identified studies, summarised study and patient  
12  
13  
14 227 characteristics, as well as study publications per year, and used bubble plots to display  
15  
16 228 evidence clusters in terms of preference type and study characteristics.

17  
18  
19 229

### 20 230 **Patient and public involvement**

21 231 A patient representative (KR) from the Federal Joint Committee “Gemeinsamer  
22  
23 232 Bundesausschuss (G-BA)” was involved in the conception and development of the evidence  
24  
25 233 map, in the interpretation of the findings, and in writing the manuscript. KR has considerable  
26  
27 234 expertise in evidence-based medicine in a health care context, and an understanding of the  
28  
29 235 pivotal role of patients’ preferences in the provision of effective health care.

30  
31  
32 236

### 33 237 **RESULTS**

#### 34 238 **Literature search and selection process**

35  
36 239 Among the 9,145 unique screened references, 152 studies (including over 57,000 patients)  
37  
38 240 were included in the evidence map. We contacted 48 authors of conference papers (13%  
39  
40 241 answered) and included one further study, which had already been identified in our electronic  
41  
42 242 search (Figure 1). Table 1 shows key characteristics of included studies. Supplementary table 3  
43  
44 243 presents excluded studies and reasons for exclusion.

45  
46 244 [About here Figure 1. Evidence map PRISMA flowchart]

47  
48 245 [About here: Table 1. Key characteristics of the included studies]

49  
50 246 [About here: link to Supplementary table 3. Excluded studies and reasons for exclusion]

51  
52  
53 247  
54  
55  
56  
57  
58  
59  
60

## 248 **Key characteristics of the included studies and participants**

249 Of the included studies, nearly all were observational (151/152), conducted in developed  
250 countries (147/152) (Table 2), published in 2007 or thereafter (128/152) (see Supplementary  
251 Figure 1), and written in English.

252 The sample size ranged from 9 to 9,105 patients and captured both sexes (51% female). The  
253 mean age of participants ranged from 60 to 85 years. Eight studies (29–36) included different  
254 age groups but only data from patients aged 60 years and older were included in the evidence  
255 map. Three studies (36–38) provided no age estimate but were included because they clarified  
256 that they had only included older patients. In 87 of the included studies, patients with  
257 multimorbidity (no index disease defined) or comorbidity (index disease defined plus at least  
258 one other associated condition) were investigated, and in the remaining 65 studies, patients  
259 with conditions known to be highly associated with multimorbidity were included.

260 [About here: link to Supplementary figure 1. Number of studies published per year]

261 [About here: Table 2. Descriptive summary of the included studies]

262

## 263 **Types of preference and evidence clusters**

264 Content analysis enabled us to identify seven major types of preference (Table 3). We assigned  
265 130 studies (85 %) to one of these types of preference and 22 (15 %) studies (37,39–57) to two  
266 types of preference. Terminology (e.g. preferences, views, perspectives), and concepts (e.g.  
267 trade-offs, decision regret, goal setting) varied substantially among studies. [About here: Table  
268 3. Description of the types of preference investigated in the included studies]

269

### 270 *End-of-life care preferences*

271 The largest evidence cluster comprised the 51 studies (34 %) addressing end-of-life care  
272 preferences, most of which were in specialised care settings (41/51 studies) (Figure 2). Content  
273 analysis of this preference revealed that advance care planning (51), in which chronic



1  
2  
3 274 multimorbid patients with advanced diseases were asked how they would like to be cared for  
4  
5 275 in the final months of their lives, was the main theme (Table 3). The most common theme  
6  
7 276 within this cluster concerned preferences for specific life-sustaining treatments (29/51)  
8  
9 277 (28,32–34,36,58–81), such as cardiopulmonary resuscitation or mechanical ventilation.  
10  
11 278 Additional topics in this cluster addressed themes such as the preferred place of death (e.g.  
12  
13 279 home versus hospice) (77).  
14  
15

16 280

### 18 281 *Self-management preferences*

20 282 The second largest evidence cluster included 34 studies (22 %) and addressed patients' self-  
21  
22 283 management priorities, defined as activities that an individual undertakes to maintain or reduce  
23  
24 284 the effect of a disease/s on their health status (82). Most studies about self-management  
25  
26 285 preferences were conducted in primary care (21/34). The only intervention study in the  
27  
28 286 evidence map (83) used a cluster-randomised design to evaluate whether structured priority-  
29  
30 287 setting consultations led to a sustainable reconciliation of diverging physician-patient views on  
31  
32 288 the importance of health problems. Overall, content analysis of this evidence cluster revealed  
33  
34 289 five key themes: (i) patients' prioritisation of their multiple health problems (20/34)  
35  
36 290 (45,47,54,83–99), as an example of which patients were asked how they prioritised their  
37  
38 291 osteoarthritis over their other conditions (97), (ii) patients' preferences regarding self-  
39  
40 292 management of their medications (8/34) (42,43,47,54,100–103) and, for instance, its  
41  
42 293 association with treatment adherence (42), (iii) patients' self-care behaviours (3/34) (44,55,104)  
43  
44 294 aimed at accomplishing their life goals (44), (iv) characteristics of eHealth support tools (2/34)  
45  
46 295 (30,105) to help patients self-manage their multiple health conditions (105) and (v) changes in  
47  
48 296 patients' choices resulting from changing circumstances (2/34) (29,30).  
49  
50

51 297

### 53 298 *Treatment preferences*

1  
2  
3 299 Thirty-two studies (22 %) investigated a variety of treatment preferences concerning (i)  
4  
5 300 medication (13/32) (37,41–43,47,49,53,54,106–109), perhaps for a specific blood pressure-  
6  
7 301 lowering drug due to its characteristics (e.g. effects and dose schedule) (109), (ii) dialysis as a  
8  
9 302 treatment option in end-stage renal disease (6/32) (48,110–114), (iii) surgery (4/32) (115–118),  
10  
11 303 such as a decision in favour of implantable cardioverter-defibrillators or joint replacement, (iv)  
12  
13 304 chemotherapy (5/32) (35,57,119–121), for which studies may have examined preferences in  
14  
15 305 adjuvant cancer treatments and, (v) non-pharmacological / conservative interventions (3/32)  
16  
17 306 (122–124), such as studies exploring preferences for activity interventions (122).  
18  
19  
20  
21  
22

307

### 308 *Involvement in the shared decision making process*

23  
24  
25 309 Twenty-five (17 %) studies explored how patients preferred to be involved in the shared  
26  
27 310 decision making process. Studies in this cluster investigated preferred (i) patterns of  
28  
29 311 engagement (21/25) (37,41,46,48–52,57,125–134), (ii) information (4/25) (39,52,129,135), (iii)  
30  
31 312 communication with providers (1/25) (40) and, (iv) patient decision aids (1/25) (56).  
32  
33  
34  
35

313

### 314 *Healthcare service preferences*

36  
37  
38  
39 315 Twelve studies (8 %) focused on preferences for certain healthcare services, and specifically (i)  
40  
41 316 preferred care processes (10/12) (45,136–144), such as continuity of care, accessibility and  
42  
43 317 acceptance of the substitution of a physician by nurses and, (ii) service models (2/12) (31,145),  
44  
45 318 perhaps asking patients about their preferences regarding Chronic Care Model  
46  
47 319 recommendations (31).  
48  
49

320

### 321 *Health outcome prioritisation and goal setting*

50  
51  
52  
53 322 Nineteen studies (13 %) investigated health outcome prioritisation and goal setting. These may  
54  
55 323 have been (i) patients' holistic goals for their lives or with respect to their various diseases  
56  
57 324 (6/19) (44,55,146–149), (ii) health outcome prioritisation (10/19) (53,150–158) - one study in  
58  
59  
60

1  
2  
3 325 particular addressed the tools patients preferred to use to prioritise health outcomes (150)  
4  
5 326 and (iii) collaborative goal setting among patients, physicians and caregivers (3/19)  
6  
7 327 (104,159,160).  
8  
9

10 328

11 329 *Screening and diagnostic tests*

12 330 One study (161) investigated cancer screening preferences among patients with  
13  
14 331 multimorbidity.  
15  
16  
17  
18

19 332

20  
21 333 [About here: Figure 2 Types of preference investigated in the included studies by setting and  
22  
23 334 study design]  
24

25 335

## 26 336 **DISCUSSION AND CONCLUSION**

27  
28 337 This work provides a systematic overview of research on health-related preferences of older  
29  
30 338 patients with multimorbidity.  
31  
32

33 339

### 34 340 **Evidence clusters**

35  
36 341 We identified 152 studies, most of which were published within the last decade and conducted  
37  
38 342 in developed countries. The vast majority of studies included in the evidence map used a  
39  
40 343 qualitative or cross-sectional quantitative design.  
41  
42

43 344 Our clustering approach revealed that studies of patient preference focused on seven areas:  
44  
45  
46 345 end-of life care, self-management, treatment, involvement in shared decision making, health  
47  
48 346 outcome prioritisation/goal setting, healthcare service delivery and screening/diagnostic  
49  
50 347 testing. The size of the evidence clusters varied widely (from 1 to 51 studies) and the research  
51  
52 348 objectives and settings differed considerably.  
53  
54

55 349 The largest and most homogenous cluster was of end-of-life preferences (51/152 studies) and  
56  
57 350 was largely confined to specialised care (41/51). Furthermore, the study objectives revealed  
58  
59  
60

1  
2  
3 351 one overarching theme (advance care planning) and were relatively uniform compared with  
4  
5 352 the other clusters.  
6  
7 353 Self-management and treatment preferences were the second (34/51) and third (32/51)  
8  
9 354 largest clusters respectively. Although studies about self-management preferences were  
10  
11 355 relatively homogeneous in terms of study setting (they were mostly conducted in primary care  
12  
13 356 (21/34)), we found considerable variability in the overarching themes. Treatment preferences  
14  
15 357 were rather heterogeneous, with the cluster containing a variety of settings and themes.  
16  
17  
18  
19  
20

### 21 359 **Evidence gaps**

22  
23 360 Longitudinal studies were rare and the few that did observe changes in preference over time  
24  
25 361 were generally about end-of-life care preferences (33,58,59,61,80,162). The only intervention  
26  
27 362 study we identified (83) highlighted the fragility of prioritisation processes over time, and  
28  
29 363 showed that health priorities shared by patients and physicians were often not sustainable  
30  
31 364 two weeks after an intervention. Preferences tend to change when chronic conditions worsen  
32  
33 365 (33,58,59,61,80,162), additional diagnoses are made that lead patients to prioritise a new  
34  
35 366 condition over existing ones (88), or new information about treatment options is obtained  
36  
37 367 (37). However, although crucial in clinical decision making, it is unclear how and why patient  
38  
39 368 preferences change significantly over time. High quality longitudinal studies are needed to  
40  
41 369 help physicians deal with changing preferences and to reassess preference-sensitive decisions.  
42  
43 370 We identified a further research gap in a lack of studies in older patients with multimorbidity  
44  
45 371 that test the effectiveness (i) of interventions using different methods to elicit/construct  
46  
47 372 preferences, and (ii) of (complex) interventions that proactively consider patient preferences  
48  
49 373 among patient-relevant outcomes.  
50  
51 374 The smallest cluster (containing only one study) concerned the preferences of older patients  
52  
53 375 with multimorbidity with respect to screening or diagnostic tests (161). This finding is  
54  
55 376 surprising, as the additional health-related burden of screening and diagnostic tests can be  
56  
57  
58  
59  
60

1  
2  
3 377 substantial, and it is well-known that the risk-benefit ratio of such tests can be highly  
4  
5 378 preference-sensitive (13).  
6  
7 379 It is worthy of note that end-of-life care preferences were mostly assessed in specialised  
8  
9 380 ambulatory care. As palliative care is a core task in primary care, we would have expected  
10  
11 381 more studies to address such end-of-life preferences in this setting (163).  
12  
13  
14 382

### 16 383 **Comparison with other studies**

18 384 This is the first evidence map of health-related preferences in older patients with  
19  
20 385 multimorbidity. Although previously published evidence summaries, such as scoping or  
21  
22 386 systematic reviews, partially addressed specific topics relating to some of the clusters  
23  
24 387 identified in this evidence map, none focused on older patients with multimorbidity.  
25  
26 388 Four systematic reviews explored preferences in end-of-life care (as well as other preferences,  
27  
28 389 such as involvement in shared decision making and goal setting): (i) Puts et al. (164,165)  
29  
30 390 systematically reviewed factors influencing older adults' (not necessarily multimorbid) decision  
31  
32 391 to accept or refuse cancer treatment, (ii) de Decker et al. (166) confirmed an association of the  
33  
34 392 wish not to be resuscitated with multimorbidity, (iii) Singh et al. (167) conducted a meta-  
35  
36 393 analysis on the roles cancer patients (not necessarily multimorbid) prefer to play in treatment  
37  
38 394 decision-making, and (iv) Vermunt et al. (168) evaluated studies of the effects of interventions  
39  
40 395 that support collaborative goal setting in elderly people with a chronic health condition or  
41  
42 396 multimorbidity, including our only intervention study (83).  
43  
44  
45  
46

47 397 Most of the evidence summaries of health-related preferences focused on end-of-life care  
48  
49 398 preferences , and specifically its determinants(164–166). Further research should concentrate  
50  
51 399 on the clusters and gaps identified in our evidence map in order to enhance our understanding  
52  
53 400 of the preferences of older patients with multimorbidity.  
54  
55  
56

57 401

### 59 402 **Strengths and limitations**

1  
2  
3 403 A major strength of our approach is that we used a sensitive strategy that combined controlled  
4  
5 404 terms (i.e. a defined vocabulary to index and retrieve information from the included electronic  
6  
7 405 databases) and free-text searches in all relevant databases. Furthermore, we did not apply any  
8  
9 406 restrictions to publication language, design, or geographical location of the studies.

11 407 Additionally, we searched for unpublished studies in registries and contacted authors of  
12  
13 408 conference papers.

16 409 However, we addressed a broad topic with incomplete indexing (both, multimorbidity and  
17  
18 410 patient preferences) and may have missed studies. In particular, we did not include search  
19  
20 411 terms for specific measures of preference (e.g., analytic hierarchy process, discrete choice  
21  
22 412 experiment, conjoint analyses) in electronic searches, because test searches including them  
23  
24 413 did not increase sensitivity. Furthermore, we did not search grey literature, as this approach  
25  
26 414 would not have identified additional relevant studies that could have justified the enormous  
27  
28 415 effort involved (169).

32 416 Despite the experience gathered in the pilot study (published elsewhere), the use of a lower  
33  
34 417 age limit of at least 60 years was difficult to operationalise, as studies often included a wide  
35  
36 418 age range but did not always report separate results for older patients. When the age group  
37  
38 419 was unclear, we did not include the study.

41 420 Furthermore, we used an iterative process to develop our evidence clusters and the identified  
42  
43 421 clusters and their definitions were agreed on by all authors. However, inherent to the methods  
44  
45 422 used, we cannot rule out some subjectivity.

47  
48 423

#### 50 424 **Conclusions and further research outlook**

52 425 This evidence map provides the first systematic overview of empirical investigations  
53  
54 426 concerning health-related preferences of older patients with multimorbidity. Their objectives  
55  
56 427 addressed a broad range of relevant topics across all settings and used predominantly cross-  
57  
58 428 sectional and observational qualitative and quantitative methods. Our evidence map also  
59  
60

1  
2  
3 429 revealed gaps, both in general – such as the scarcity of longitudinal studies to investigate  
4  
5 430 changes in preferences over time, and of intervention studies, which, with one exception (83)  
6  
7 431 failed to develop and test interventions to support the construction of health-related  
8  
9 432 preferences in this population. More specifically, we found a remarkably low number of  
10  
11 433 studies addressing preferences concerning end-of-life care in a primary care setting, as well as  
12  
13 434 preferences related to screening and diagnostic testing. Furthermore, the included studies  
14  
15 435 varied considerably in terms of terminology (e.g. preferences, priorities, views, perceptions)  
16  
17 436 and decision-making components and concepts (e.g. trade-offs, decision regret, goal setting).  
18  
19 437 These require further elucidation.  
20  
21  
22

23 438

24  
25 439 **FULL REFERENCES**

- 26  
27  
28 440 1. van den Akker M, Buntinx F, Knottnerus JA. Comorbidity or multimorbidity: what's in a  
29  
30 441 name? A review of literature. *Eur J Gen Pract.* 1996 Jan 11;2(2):65–70.  
31  
32 442 2. Weiss CO, Varadhan R, Puhan MA, Vickers A, Bandeen-Roche K, Boyd CM, et al.  
33  
34 443 Multimorbidity and evidence generation. *J Gen Intern Med.* 2014;29(4):653–60.  
35  
36 444 3. Fortin M, Bravo G, Hudon C, Vanasse A, Lapointe L. Prevalence of multimorbidity  
37  
38 445 among adults seen in family practice. *Ann Fam Med.* 2005;3(3):223–8.  
39  
40 446 4. Vogeli C, Shields AE, Lee TA, Gibson TB, Marder WD, Weiss KB, et al. Multiple Chronic  
41  
42 447 Conditions: Prevalence, Health Consequences, and Implications for Quality, Care  
43  
44 448 Management, and Costs. *J Gen Intern Med.* 2007 Dec 16;22(S3):391–5.  
45  
46 449 5. N'Goran AA, Déruaz-Luyet A, Haller DM, Zeller A, Rosemann T, Streit S, et al. Comparing  
47  
48 450 the self-perceived quality of life of multimorbid patients and the general population  
49  
50 451 using the EQ-5D-3L. Liu C, editor. *PLoS One.* 2017 Dec 19;12(12):e0188499.  
51  
52 452 6. May CR, Eton DT, Boehmer K, Gallacher K, Hunt K, MacDonald S, et al. Rethinking the  
53  
54 453 patient: using Burden of Treatment Theory to understand the changing dynamics of  
55  
56 454 illness. *BMC Health Serv Res.* 2014 Dec 26;14(1):281.  
57  
58  
59  
60

- 1  
2  
3 455 7. Sav A, King MA, Whitty JA, Kendall E, McMillan SS, Kelly F, et al. Burden of treatment for  
4  
5 456 chronic illness: a concept analysis and review of the literature. *Heal Expect*. 2015  
6  
7 457 Jun;18(3):312–24.
- 8  
9 458 8. Zulman DM, Asch SM, Martins SB, Kerr EA, Hoffman BB, Goldstein MK. Quality of care  
10  
11 459 for patients with multiple chronic conditions: the role of comorbidityinterrelatedness. *J*  
12  
13 460 *Gen Intern Med*. 2013;29(3):529–37.
- 14  
15 461 9. Boyd CM, Darer J, Boulton C, Fried LP, Boulton L, Wu AW. Clinical Practice Guidelines and  
16  
17 462 Quality of Care for Older Patients. *N Engl J Med*. 2014;294(6):716–24.
- 18  
19 463 10. Muth C, Kirchner H, van den Akker M, Scherer M, Glasziou PP. Current guidelines poorly  
20  
21 464 address multimorbidity: pilot of the interaction matrix method. *J Clin Epidemiol*. 2014  
22  
23 465 Nov;67(11):1242–50.
- 24  
25 466 11. Institute of Medicine. *Crossing the quality chasm: a new health system for the 21st*  
26  
27 467 *century*. Washington DC: National Academy Press; 2001.
- 28  
29 468 12. Muth C, van den Akker M, Blom JW, Mallen CD, Rochon J, Schellevis FG, et al. The  
30  
31 469 Ariadne principles: how to handle multimorbidity in primary care consultations. *BMC*  
32  
33 470 *Med*. 2014 Dec 8;12(1):223.
- 34  
35 471 13. Muth C, Blom JW, Smith SM, Johnell K, Gonzalez-Gonzalez AI, Nguyen TS, et al.  
36  
37 472 Evidence supporting the best clinical management of patients with multimorbidity and  
38  
39 473 polypharmacy: a systematic guideline review and expert consensus. *J Intern Med*.  
40  
41 474 2019;283(3):272–88.
- 42  
43 475 14. Valderas JM, Gangannagaripalli J, Nolte E, Boyd C, Roland M, Sarria-Santamera A, et al.  
44  
45 476 Quality of care assessment for people with multimorbidity. *J Intern Med* [Internet].  
46  
47 477 2019 Feb 5;joim.12881. Available from:  
48  
49 478 <https://onlinelibrary.wiley.com/doi/abs/10.1111/joim.12881>
- 50  
51 479 15. Lichtenstein S, Slovic P. *The Construction of Preference*. Cambridge; New York:  
52  
53 480 Cambridge University Press; 2006.



- 1  
2  
3 481 16. Wegwarth O, Gigerenzer G. Statistical illiteracy in doctors. In: Gigerenzer G, Muir Gray J,  
4  
5 482 editors. Better doctors, better patients, better decisions: Envisioning health care 2020  
6  
7 483 Strüngmann Forum Report. 1st Editio. Cambridge, UK: MIT Press; 2011. p. 137–51.  
8  
9  
10 484 17. Hoffmann TC, Del Mar C. Patients' Expectations of the Benefits and Harms of  
11  
12 485 Treatments, Screening, and Tests. *JAMA Intern Med.* 2015 Feb 1;175(2):274.  
13  
14 486 18. Tinetti ME, Fried TR, Boyd CM. Designing Health Care for the Most Common Chronic  
15  
16 487 Condition—Multimorbidity. *JAMA.* 2012 Jun 20;307(23).  
17  
18 488 19. Miake-Lye IM, Hempel S, Shanman R, Shekelle PG. What is an evidence map? A  
19  
20 489 systematic review of published evidence maps and their definitions, methods, and  
21  
22 490 products. *Syst Rev.* 2016;5(1):28.  
23  
24  
25 491 20. González-González AI, Schmucker C, Blom J, van den Akker M, Nguyen TS, Nothacker J,  
26  
27 492 et al. Health-related preferences of older patients with multimorbidity: the protocol for  
28  
29 493 an evidence map. *BMJ Open* [Internet]. 2019 Sep 3;9(9):e029724. Available from:  
30  
31 494 <http://bmjopen.bmj.com/lookup/doi/10.1136/bmjopen-2019-029724>  
32  
33  
34 495 21. Tricco AC, Lillie E, Zarin W, O'Brien KK, Colquhoun H, Levac D, et al. PRISMA Extension  
35  
36 496 for Scoping Reviews (PRISMA-ScR): Checklist and Explanation. *Ann Intern Med.* 2018  
37  
38 497 Oct 2;169(7):467.  
39  
40  
41 498 22. U.S.National Library of Medicine. *ClinicalTrials.gov* [Internet]. Available from:  
42  
43 499 <http://clinicaltrials.gov/>  
44  
45  
46 500 23. World Health Organization. International Clinical Trials Registry Platform (ICTRP)  
47  
48 501 [Internet]. Available from: <http://www.who.int/ictrp/en/>  
49  
50  
51 502 24. Holland AE, Harrison SL, Brooks D. Multimorbidity, frailty and chronic obstructive  
52  
53 503 pulmonary disease. *Chron Respir Dis.* 2016 Nov 26;13(4):372–82.  
54  
55 504 25. Chamberlain AM, St Sauver JL, Gerber Y, Manemann SM, Boyd CM, Dunlay SM, et al.  
56  
57 505 Multimorbidity in Heart Failure: A Community Perspective. *Am J Med.* 2016;128(1):38–  
58  
59 506 45.  
60

- 1  
2  
3 507 26. Fraser S, Taal M. Multimorbidity in people with chronic kidney disease: implications for  
4  
5 508 outcomes and treatment. *Curr Opin Nephrol Hypertens*. 2016;25(6):465–72.  
6  
7 509 27. Erlingsson C, Brysiewicz P. A hands-on guide to doing content analysis. *African J Emerg*  
8  
9 510 *Med [Internet]*. 2017 Sep;7(3):93–9. Available from:  
11  
12 511 <https://linkinghub.elsevier.com/retrieve/pii/S2211419X17300423>  
13  
14 512 28. Brunner-La Rocca H-P, Rickenbacher P, Muzzarelli S, Schindler R, Maeder MT, Jeker U,  
15  
16 513 et al. End-of-life preferences of elderly patients with chronic heart failure. *Eur Heart J*.  
17  
18 514 2012;33:752–9.  
19  
20 515 29. Baxter K. Changing choices: disabled and chronically ill people' s experiences of  
21  
22 516 reconsidering choices. *Chronic Illn*. 2012;9(2):116–32.  
23  
24 517 30. Morris RL, Sanders C, Kennedy AP, Rogers A. Shifting priorities in multimorbidity: a  
25  
26 518 longitudinal qualitative study of patient's prioritization of multiple conditions. *Chronic*  
27  
28 519 *Illn*. 2011 Jun 22;7(2):147–61.  
29  
30 520 31. Krucien N, Le Vaillant M, Pelletier-Fleury N. What are the patients' preferences for the  
31  
32 521 Chronic Care Model? An application to the obstructive sleep apnoea syndrome. *Heal*  
33  
34 522 *Expect*. 2015 Dec;18(6):2536–48.  
35  
36 523 32. Krumholz HM, Phillips RS, Hamel MB, Teno JM, Bellamy P, Broste SK, et al.  
37  
38 524 Resuscitation Preferences Among Patients With Severe Congestive Heart Failure.  
39  
40 525 *Circulation*. 1998;98:648–55.  
41  
42 526 33. Tang ST, Wen F, Hsieh C, Chou W. Preferences for Life-Sustaining Treatments and  
43  
44 527 Associations With Accurate Prognostic Awareness and Depressive Symptoms in  
45  
46 528 Terminally Ill Cancer Patients' Last Year of Life. *J Pain Symptom Manage*. 2016;51(1):41-  
47  
48 529 51.e1.  
49  
50 530 34. Wright AA, Mack JW, Kritek PA, Balboni TA. Influence of Patients' Preferences and  
51  
52 531 Treatment Site on Cancer Patients' End-of-Life Care. *Cancer*. 2010;116:4656–63.  
53  
54 532 35. Zafar SY, Malin JL, Grambow SC, Abbot DH, Kolimaga, Jane T, Zullig LL, Weeks JC, et al.  
55  
56  
57  
58  
59  
60

- 1  
2  
3 533 Chemotherapy Use and Patient Treatment Preferences in Advanced Colorectal Cancer.  
4  
5 534 Cancer. 2013;119:854–62.  
6  
7 535 36. Hamel MB, Lynn J, Teno JM, Covinsky KE, Wu AW, Galanos A, et al. Age-Related  
8  
9 536 Differences in Care Preferences, Treatment Decisions, and Clinical Outcomes of  
10  
11 537 Seriously Ill Hospitalized Adults: Lessons from SUPPORT. *J Am Geriatr Soc.* 2000  
12  
13 538 May;48(S1):S176–82.  
14  
15  
16 539 37. Ainslie N, Beisecker A. Changes in Decision by Elderly Persons Based on Treatment  
17  
18 540 Description. *Arch Intern Med.* 1994;154:2225–33.  
19  
20  
21 541 38. Fried TR, Tinetti ME, Towle V, O’Leary JR, Iannone L. Effects of Benefits and Harms on  
22  
23 542 Older Persons’ Willingness to Take Medication for Primary Cardiovascular Prevention.  
24  
25 543 *Arch Intern Med.* 2011 May 23;171(10).  
26  
27  
28 544 39. Caldwell PH, Arthur HM, Demers C. Preferences of patients with heart failure for  
29  
30 545 prognosis communication. *Can J Cardiol.* 2007;23(10):791–6.  
31  
32 546 40. Linsky A, Simon SR, Bokhour B. Patient Education and Counseling Patient perceptions of  
33  
34 547 proactive medication discontinuation. *Patient Educ Couns.* 2015;98(2):220–5.  
35  
36 548 41. Linsky A, Simon SR, Stolzmann K, Meterko M. Patient Perceptions of Deprescribing  
37  
38 549 Survey Development and Psychometric Assessment. *Med Care.* 2017;55:306–13.  
39  
40  
41 550 42. McKillop G, Joy J. Patients’ experience and perceptions of polypharmacy in chronic  
42  
43 551 kidney disease and its impact on adherent behaviour. *J Ren Care.* 2013 Dec;39(4):200–  
44  
45 552 7.  
46  
47  
48 553 43. Milic M, Foster A, Rihawi K, Anthony A, Twelves C. ScienceDirect ‘Tablet burden’ in  
49  
50 554 patients with metastatic breast cancer. *Eur J Cancer.* 2016;55:1–6.  
51  
52 555 44. Morrow AS, Haidet P, Skinner J, Naik AD. Integrating diabetes self-management with  
53  
54 556 the health goals of older adults: A qualitative exploration. *Patient Educ Couns.*  
55  
56 557 2008;72:418–23.  
57  
58  
59 558 45. Noël PH, Frueh BC, Larme AC, Pugh JA. Collaborative care needs and preferences of  
60

- 1  
2  
3 559 primary care patients with multimorbidity. *Heal Expect.* 2005 Mar;8(1):54–63.  
4  
5 560 46. Pardon K, Deschepper R, Vander R, Bernheim J, Mortier F, Deliens L. Patient Education  
6  
7 561 and Counseling Preferences of advanced lung cancer patients for patient-centred  
8  
9 562 information and decision-making: A prospective multicentre study in 13 hospitals in  
10  
11 563 Belgium. *Patient Educ Couns.* 2009;77:421–9.  
12  
13  
14 564 47. Rifkin DE, Laws MB, Rao M, Balakrishnan V, Sarnak MJ, Wilson IB. Medication  
15  
16 565 Adherence Behavior and Priorities Among Older Adults With CKD: A Semistructured  
17  
18 566 Interview Study. *Am J Kidney Dis.* 2010;56(3):439–46.  
19  
20  
21 567 48. Song M, Lin F, Gilet CA, Arnold RM, Bridgman JC. Patient perspectives on informed  
22  
23 568 decision-making surrounding dialysis initiation. *Nephrol Dial.* 2013;28:2815–23.  
24  
25 569 49. Tariman JD, Doorenbos A, Schepp KG, Becker PS. Patient, Physician and Contextual  
26  
27 570 Factors Are Influential in the Treatment Decision Making of Older Adults Newly  
28  
29 571 Diagnosed with Symptomatic Myeloma. *Cancer Treat Commun.* 2014;2(2–3):34–47.  
30  
31  
32 572 50. Chiu C, Feuz MA, McMahan RD, Miao Y, Sudore RL. ““Doctor, Make My Decisions””:  
33  
34 573 Decision Control Preferences , Advance Care Planning , and Satisfaction With  
35  
36 574 Communication Among Diverse Older Adults. *J Pain Symptom Manage.* 2016;51(1):33–  
37  
38 575 40.  
39  
40  
41 576 51. Clover A, Browne J, Mcerlain P, Vandenberg B. Patient approaches to clinical  
42  
43 577 conversations in the palliative care setting. *J Adv Nurs.* 2004;48(4):333–41.  
44  
45 578 52. Efficace F, Gaidano G, Sprangers M, Cottone F, Breccia M, Voso MT, et al. Preference  
46  
47 579 for involvement in treatment decisions and request for prognostic information in newly  
48  
49 580 diagnosed patients with higher-risk myelodysplastic syndromes. *Ann Oncol.*  
50  
51 581 2014;25:1258–65.  
52  
53  
54 582 53. Fried TR, McGraw S, Agostini J V, Tinetti ME. Views of older persons with multiple  
55  
56 583 morbidities on competing outcomes and clinical decision-making. *J Am Geriatr Soc.*  
57  
58 584 2008;56(10):1839–44.  
59  
60

- 1  
2  
3 585 54. Hopper I, Fracp M, Silva C De, Beds RN, Skiba M, Sec B, et al. Attitudes of Patients and  
4  
5 586 Prescribing Clinicians to Polypharmacy and Medication Withdrawal in Heart Failure. J  
6  
7 587 Card Fail. 2016;22(9):9–10.  
8  
9 588 55. Huang ES, Gorawara-bhat R, Chin MH. Self-Reported Goals of Older Patients with Type  
10  
11 589 2 Diabetes Mellitus. J Am Geriatr Soc. 2005;53:306–11.  
12  
13  
14 590 56. Jones J, Nowels C, Kutner JS, Matlock DD. Shared decision making and the use of a  
15  
16 591 patient decision aid in advanced serious illness: provider and patient perspectives. Heal  
17  
18 592 Expect. 2014;18:3236–47.  
19  
20 593 57. Jorgensen ML, Young JM, Solomon MJ. Adjuvant chemotherapy for colorectal cancer:  
21  
22 594 age differences in factors influencing patients' treatment decisions. Patient Prefer  
23  
24 595 Adherence. 2013;7:827–34.  
25  
26 596 58. Fried TR, Ness PH Van, Byers AL, Towle VR, Leary JRO, Dubin JA. Changes in Preferences  
27  
28 597 for Life-Sustaining Treatment Among Older Persons with Advanced Illness. Soc Gen  
29  
30 598 Intern Med. 2007;22:495–501.  
31  
32 599 59. Fried TR, O'Leary J, Van Ness P, Fraenkel L. Inconsistency Over Time in the Preferences  
33  
34 600 of Older Persons with Advanced Illness for Life-Sustaining Treatment. J Am Geriatr Soc  
35  
36 601 [Internet]. 2007 Jul;55(7):1007–14. Available from:  
37  
38 602 <http://doi.wiley.com/10.1111/j.1532-5415.2007.01232.x>  
39  
40  
41 603 60. Hamel MB, Teno JM, Goldman L, Lynn J, Davis RB, Galanos AN, et al. Patient Age and  
42  
43 604 Decisions To Withhold Life-Sustaining Treatments from Seriously Ill, Hospitalized Adults.  
44  
45 605 Ann Intern Med. 1999;130:116–25.  
46  
47  
48 606 61. Janssen DJA, Spruit MA, Schols JMGA, Cox B, Nawrot TS, Curtis JR, et al. Predicting  
49  
50 607 Changes in Preferences for Life-Sustaining Treatment Among Patients With Advanced  
51  
52 608 Chronic Organ Failure. Chest. 2012 May;141(5):1251–9.  
53  
54  
55 609 62. Klindtworth K, Oster P, Hager K, Krause O, Bleidorn J, Schneider N. Living with and dying  
56  
57 610 from advanced heart failure: understanding the needs of older patients at the end of  
58  
59  
60

- 1  
2  
3 611 life. BMC Geriatr. 2015;15:125.  
4  
5 612 63. Li W, Ng HL, Li W, Piano AN, Karim SA, Dip A. Treatment Preferences at the End-of-Life  
6  
7 613 in Parkinson's Disease Patients. Mov Disord Clin Pract. 2016;3(5):483–9.  
8  
9 614 64. Lynn J, Ely EW, Zhong Z, Landrum K, Mph M, Dawson N V, et al. Living and Dying with  
10  
11 615 Chronic Obstructive Pulmonary Disease. J Am Geriatr Soc. 2000;48:S91–100.  
12  
13 616 65. Moss AH, Hozayen O, King K, Holley JL, Schmidt RJ. Attitudes of Patients Toward  
14  
15 617 Cardiopulmonary Resuscitation in the Dialysis Unit. Am J Kidney Dis. 2001;38(4):847–  
16  
17 618 52.  
18  
19 619 66. O'Brien LA, Grisso JA, Maislin G, Lapann K, Karol P, Greco PJ, et al. Nursing Home  
20  
21 620 Residents' Preferences for Life-Sustaining Treatments. JAMA. 2015;274:1775–9.  
22  
23 621 67. Ostermann ME, Nelson SR. Haemodialysis patients' views on their resuscitation status.  
24  
25 622 Nephrol Dial Transpl. 2003;18:1644–7.  
26  
27 623 68. Parr JD, Zhang B, Nilsson ME, Paulk E, Prigerson HG, Ph D. The Influence of Age on the  
28  
29 624 Likelihood of Receiving. J Palliat Med. 2010;13(6):719–26.  
30  
31 625 69. Rahemi Z, Williams CL, Tappen RM, Engstrom GA. Health-Related Decisions for Serious  
32  
33 626 Illness Among Ethnically Diverse Older Adults. Adv Nurs Sci. 2018;41(1):84–97.  
34  
35 627 70. Reinke LF, Slatore CG, Udriș EM, Moss BR, Johnson EA, Au DH. The Association of  
36  
37 628 Depression and Preferences for Life-Sustaining Treatments in Veterans with Chronic  
38  
39 629 Obstructive Pulmonary Disease. J Pain Symptom Manage. 2011;41(2):402–11.  
40  
41 630 71. Sharma R, Jayathissa S, Weatherall M. Cardiopulmonary resuscitation knowledge and  
42  
43 631 opinions on end of life decision making of older adults admitted to an acute medical  
44  
45 632 service. NZMJ. 2016;129(1428):25–35.  
46  
47 633 72. Stapleton RD, Nielsen EL, Engelberg RA. Association of Depression and Life- Sustaining  
48  
49 634 Treatment Preferences in Patients With COPD. Chest. 2005;127(1):328–34.  
50  
51 635 73. Tang ST, Liu T, Wen F, Hsu C. A Decade of Changes in Preferences for Life-Sustaining  
52  
53 636 Treatments Among Terminally Ill Patients With Cancer. J Natl Compr Canc Netw.  
54  
55  
56  
57  
58  
59  
60

- 1  
2  
3 637 2015;13(12):1510–8.  
4  
5 638 74. Teno JM, Fisher E, Hamel B. Decision-Making and Outcomes of Prolonged ICU Stays in  
6  
7 639 Seriously Ill Patients. *JAGS*. 2000;48:70–4.  
8  
9 640 75. Uhlmann RF, Robert A. Perceived Quality of Life and Preferences for Treatment in Older  
10  
11 641 Adults Life-Sustaining. *Arch Intern Med*. 1991;151:80–2.  
12  
13 642 76. Weeks JC, Cook EF, Day SJO, Peterson LM, Wenger N, Reding D, et al. Relationship  
14  
15 643 Between Cancer Patients' Predictions of Prognosis and Their Treatment Preferences.  
16  
17 644 *JAMA*. 1998;279(21):1709–11.  
18  
19 645 77. Casarett D, Ness APH Van, Leary JRO, Fried TR. Are Patient Preferences for Life-  
20  
21 646 Sustaining Treatment Really a Barrier to Hospice Enrollment for Older Adults with  
22  
23 647 Serious. *J Am Geriatr Soc*. 2006;54:472–8.  
24  
25 648 78. Cosgriff JA, Pisani M, Bradley EH, Leary JRO, Fried TR. The Association between  
26  
27 649 Treatment Preferences and Trajectories of Care at the End-of-Life Description of  
28  
29 650 Participants. *J Gen Intern Med*. 2007;22(11):1566–71.  
30  
31 651 79. Downey L, Au DH, Curtis JR, Engelberg RA. Life-Sustaining Treatment Preferences:  
32  
33 652 Matches and Mismatches Between Patients' Preferences and Clinicians' Perceptions. *J*  
34  
35 653 *Pain Symptom Manage* [Internet]. 2013;46(1):9–19. Available from:  
36  
37 654 <http://dx.doi.org/10.1016/j.jpainsymman.2012.07.002>  
38  
39 655 80. Dunlay SM, Swetz KM, Redfield MM. Resuscitation Preferences in Community Patients  
40  
41 656 with Heart Failure. *Circ Cardiovasc Qual Outcomes*. 2014;7(3):353–9.  
42  
43 657 81. Fried TR, Bradley EH, Towle VR, Emanuel EJ, Emanuel LL. Assessment of Patient  
44  
45 658 Preferences: Integrating Treatments and Outcomes. *J Gerontol*. 2002;57(6):348–54.  
46  
47 659 82. Bratzke LC, Muehrer RJ, Kehl KA, Lee KS, Ward EC, Kwekkeboom KL. Self-management  
48  
49 660 priority setting and decision-making in adults with multimorbidity: a narrative review of  
50  
51 661 literature. *Int J Nurs Stud*. 2015 Mar;52(3):744–55.  
52  
53 662 83. Junius-Walker U, Ma IV, Hofmann W, Hummers-pradier E, Dierks ML. Impact of a  
54  
55  
56  
57  
58  
59  
60

- 1  
2  
3 663 priority-setting consultation on doctor – patient agreement after a geriatric  
4  
5 664 assessment: cluster randomised controlled trial in German general practices. *Qual Prim*  
6  
7 665 *Care*. 2012;20:321–34.  
8  
9  
10 666 84. Junius-Walker U, Stolberg D, Steinke P, Theile G, Hummers-Pradier E, Dierks M-L.  
11  
12 667 Health and treatment priorities of older patients and their general practitioners: a  
13  
14 668 cross-sectional study. *Qual Prim Care*. 2011;19:67–76.  
15  
16 669 85. Kerr EA, Heisler M, Krein SL, Kabeto M, Langa KM, Weir D, et al. Beyond Comorbidity  
17  
18 670 Counts: How Do Comorbidity Type and Severity Influence Diabetes Patients’ Treatment  
19  
20 671 Priorities. *J Gen Intern Med*. 2007;22(12):1635–40.  
21  
22  
23 672 86. Lindsay S. Prioritizing illness: Lessons in Self-managing Multiple Chronic Diseases. *Can J*  
24  
25 673 *Sociol*. 2009;34(4):983–1002.  
26  
27  
28 674 87. McDonald VM, Higgins I, Simpson JL, Gibson PG. The importance of clinical  
29  
30 675 management problems in older people with COPD and asthma: do patients and  
31  
32 676 physicians agree? *Prim Care Respir J* [Internet]. 2011 Mar 29;20(4):389–95. Available  
33  
34 677 from: <http://www.nature.com/articles/pcrj201125>  
35  
36 678 88. Morris RL, Sanders C, Kennedy AP, Rogers A, Morris RL, Sanders C, et al. Shifting  
37  
38 679 priorities in multimorbidity: a longitudinal qualitative study of patient’s prioritization of  
39  
40 680 multiple conditions. *Chronic Illn*. 2011;7:147.  
41  
42  
43 681 89. Richardson LM, Hill JN, Smith BM, Bauer E, Weaver FM, Gordon HS, et al. Patient  
44  
45 682 prioritization of comorbid chronic conditions in the Veteran population: Implications for  
46  
47 683 patient-centered care. *SAGE Open Med*. 2016;4:1–11.  
48  
49  
50 684 90. Zulman DM, Kerr EA, Hofer TP, Heisler M, Zikmund-fisher BJ. Patient-Provider  
51  
52 685 Concordance in the Prioritization of Health Conditions Among Hypertensive Diabetes  
53  
54 686 Patients. *J Gen Intern Med*. 2010;25(5):408–14.  
55  
56  
57 687 91. Schoenberg NE, Leach C, Edwards W. “It’s a toss up between my hearing, my heart, and  
58  
59 688 my hip”: Prioritizing and Accommodating Multiple Morbidities by Vulnerable Older  
60



- 1  
2  
3 689 Adults. *J Heal Care Poor Underserved*. 2009;20(1):134–51.  
4  
5 690 92. Fix GM, Cohn ES, Solomon JL, Corte DE, Mueller N, Kressin NR, et al. The role of  
6  
7 691 comorbidities in patients' hypertension self-management. *Chronic Illn*. 2014;10(2):81–  
8  
9 692 92.  
10  
11  
12 693 93. Proctor EK, Hasche L, Morrow-Howell N, Shumway M, Snell G. Perceptions About  
13  
14 694 Competing Psychosocial Problems and Treatment Priorities Among Older Adults With  
15  
16 695 Depression. *Psychiatr Serv*. 2008;59(6):670–5.  
17  
18 696 94. Beverly EA. Incorporating comorbidity, values and preferences into clinical care  
19  
20 697 guidelines designed for older adults living with type 2 diabetes. The Pennsylvania State  
21  
22 698 University; 2008.  
23  
24 699 95. Beverly E, Wray L, Chiu C, Weinger K. Perceived challenges and priorities in co-  
25  
26 700 morbidity management of older patients with Type 2 diabetes. *Diabet Med*.  
27  
28 701 2011;28(7):781–4.  
29  
30 702 96. Bower P, Harkness E, Macdonald W, Coventry P, Bundy C, Moss-Morris R. Illness  
31  
32 703 representations in patients with multimorbid long-term conditions : Qualitative study.  
33  
34 704 *Psychol Health*. 2012;27(10):1211–26.  
35  
36  
37 705 97. Cheraghi-Sohi S, Morden A, Bower P, Kennedy A, Rogers A, Richardson J, et al. Exploring  
38  
39 706 patient priorities among long-term conditions in multimorbidity: A qualitative  
40  
41 707 secondary analysis. *SAGE Open Med*. 2013 Jan 25;1:205031211350395.  
42  
43  
44 708 98. Cheraghi-Sohi S, Bower P, Kennedy A, Morden A, Rogers A, Richardson J, et al. Patient  
45  
46 709 Priorities in Osteoarthritis and Comorbid Conditions: A Secondary Analysis of  
47  
48 710 Qualitative Data. *Arthritis Care Res (Hoboken)*. 2013;65(6):920–7.  
49  
50  
51 711 99. Hansen H, Pohontsch N, van den Bussche H, Scherer M, Schäfer I. Reasons for  
52  
53 712 disagreement regarding illnesses between older patients with multimorbidity and their  
54  
55 713 GPs – a qualitative study. *BMC Fam Pract*. 2015 Dec 2;16(1):68.  
56  
57  
58 714 100. Haverhals LM, Lee CA, Siek KA, Darr CA, Linnebur SA, Ruscini JM, et al. Older Adults with  
59  
60

- 1  
2  
3 715 Multi-Morbidity: Medication Management Processes and Design Implications for  
4  
5 716 Personal Health Applications. *J Med Internet Res.* 2011;13(2):1–12.  
6  
7 717 101. Manias E, Claydon-Platt K, McColl GJ, Bucknall TK, Brand CA. Managing Complex  
8  
9 718 Medication Regimens: Perspectives of Consumers with Osteoarthritis and Healthcare  
10  
11 719 Professionals. *Pain Manag.* 2007;41:764–71.  
12  
13  
14 720 102. Moen J, Bohm A, Tillenius T, Antonov K, Nilsson JLG, Ring L. Patient Education and  
15  
16 721 Counseling ““ I don ” t know how many of these [ medicines ] are necessary ..”— A  
17  
18 722 focus group study among elderly users of multiple medicines. 2009;74:135–41.  
19  
20  
21 723 103. Pagès-Puigdemont N, Mangues MA, Masip M, Gabriele G, Fernández-Maldonado L,  
22  
23 724 Blancafort S, et al. Patients’ Perspective of Medication Adherence in Chronic  
24  
25 725 Conditions: A Qualitative Study. *Adv Ther.* 2016;33:1740–54.  
26  
27  
28 726 104. Brown VA, Bartholomew LK, Naik AD. Management of chronic hypertension in older  
29  
30 727 men: An exploration of patient goal-setting. *Patient Educ Couns.* 2007;69:93–9.  
31  
32 728 105. Zulman DM, Jenchura EC, Cohen DM, Lewis ET, Ph D, Houston TK, et al. How Can  
33  
34 729 eHealth Technology Address Challenges Related to Multimorbidity? Perspectives from  
35  
36 730 Patients with Multiple Chronic Conditions. *J Gen Intern Med.* 2015;30(8):1063–70.  
37  
38  
39 731 106. Dinapoli EA, Cinna C, Whiteman KL, Fox L, Appelt CJ. Mental health treatment  
40  
41 732 preferences and challenges of living with multimorbidity from the veteran perspective.  
42  
43 733 *Int J Geriatr Psychiatry.* 2016;31:1097–104.  
44  
45  
46 734 107. Rothman MD, Ness PH Van, Leary JRO, Fried TR. Refusal of Medical and Surgical  
47  
48 735 Interventions by Older Persons with Advanced Chronic Disease. *Soc Gen Intern Med.*  
49  
50 736 2007;22:982–7.  
51  
52 737 108. Caughey GE, Tait K, Vitry AI, Shakib S. Influence of medication risks and benefits on  
53  
54 738 treatment preferences in older patients with multimorbidity. *Patient Prefer*  
55  
56 739 *Adherence.* 2017;11:131–40.  
57  
58  
59 740 109. de Vries ST, de Vries FM, Dekker T, Haaijer-ruskamp FM. The Role of Patients’ Age on  
60

- 1  
2  
3 741 Their Preferences for Choosing Additional Blood Pressure-Lowering Drugs: A Discrete  
4  
5 742 Choice Experiment in Patients with Diabetes. PLoS One. 2015;10(10):1–15.  
6  
7 743 110. Chanouzas D, Ng KP, Fallouh B, Baharani J. What influences patient choice of treatment  
8  
9 744 modality at the pre-dialysis stage ? Nephrol Dial Transpl. 2012;27:1542–7.  
10  
11 745 111. Morton RL, Snelling P, Webster AC. Dialysis Modality Preference of Patients With CKD  
12  
13 746 and Family Caregivers: A Discrete-Choice Study. AJKD. 2012;60(1):102–11.  
14  
15 747 112. Morton RL, Snelling P, Webster AC, Rose J, Masterson R, Johnson DW, et al. Factors  
16  
17 748 influencing patient choice of dialysis versus conservative care to treat end-stage kidney  
18  
19 749 disease. CMJA. 2012;184(5):277–83.  
20  
21 750 113. Seah AST, Tan iona T, Srinivas S, Wu HY, Griva K. Opting out of dialysis – Exploring  
22  
23 751 patients’ decisions to forego dialysis in favour of conservative non-dialytic  
24  
25 752 management for end-stage renal disease. Heal Expect. 2013;18:1018–29.  
26  
27 753 114. Visser A, Dijkstra G, Kuiper D, de Jong PE, Franssen C, Gansevoort RT, et al. Accepting or  
28  
29 754 declining dialysis Accepting or declining dialysis: considerations taken into account by  
30  
31 755 elderly patients with end-stage renal disease. J Nephrol. 2009;22(6):794–9.  
32  
33 756 115. Green AR, Boyd CM, Rickard J, Gomon R, Leff B. Attitudes of older adults with serious  
34  
35 757 competing health risks toward their implantable cardioverter-defibrillators: a pilot  
36  
37 758 study. BMC Geriatr. 2015;15:173.  
38  
39 759 116. Green AR, Jenkins AMY, Masoudi FA, Magid DJ, Kutner JS, Leff B, et al. Decision-Making  
40  
41 760 Experiences of Patients with Implantable Cardioverter Defibrillators. PACE.  
42  
43 761 2016;39:1061–9.  
44  
45 762 117. Parks ML, Hebert-beirne J, Rojas M, Tuzzio L, Nelson CL, Boutin-foster C. A Qualitative  
46  
47 763 Study of Factors Underlying Decision Making for Joint Replacement among African  
48  
49 764 Americans and Latinos with Osteoarthritis. J Long Term Eff Med Implant.  
50  
51 765 2014;24(0):205–12.  
52  
53 766 118. Suggs PD, Holliday TL, Thompson SN. Factors Affecting Choice of Treatment for Early-

- 1  
2  
3 767 Stage Breast Cancer in West Virginia: A 10-Year Experience from a Rural Tertiary Care  
4  
5 768 Center. *Am Surg.* 2013;83:13–6.  
6  
7 769 119. Gironés R, Torregrosa D, Inma JG, Jose M, Tenias M, Rosell R. Lung cancer  
8  
9 770 chemotherapy decisions in older patients: the role of patient preference and  
10  
11 771 interactions with physicians. *Clin Transl Oncol.* 2012;14:183–9.  
12  
13 772 120. Hamelinck VC, Bastiaannet E, Pieterse AH, Glas NA De, Portielje JEA, Merkus JWS, et al.  
14  
15 773 Original Study A Prospective Comparison of Younger and Older Patients' Preferences  
16  
17 774 for Adjuvant Chemotherapy and Hormonal Therapy in Early Breast Cancer. *Clin Breast*  
18  
19 775 *Cancer.* 2016;(October):379–88.  
20  
21 776 121. Puts MTE, Sattar S, Mcwatters K, Lee K, Kulik M, Macdonald M, et al. Chemotherapy  
22  
23 777 treatment decision-making experiences of older adults with cancer , their family  
24  
25 778 members , oncologists and family physicians: a mixed methods study. *Support Care*  
26  
27 779 *Cancer.* 2017;25:879–86.  
28  
29 780 122. Fox MT, Sidani S, Brooks D, Mccague H. Perceived acceptability and preferences for  
30  
31 781 low-intensity early activity interventions of older hospitalized medical patients exposed  
32  
33 782 to bed rest: a cross sectional study. *BMC Geriatr.* 2018;18:53.  
34  
35 783 123. Lyle S, Williamson E, Darton F, Griffiths F, Lamb E, Lyle S, et al. A qualitative study of  
36  
37 784 older people' s experience of living with neurogenic claudication to inform the  
38  
39 785 development of a physiotherapy intervention. *Disabil Rehabil.* 2017;39(10):1009–17.  
40  
41 786 124. O'Dell KK, Jacelon C, Morse AN. 'I 'd Rather Just Go On as I Am' – Pelvic Floor Care  
42  
43 787 Preferences Residential Care. *Urol Nurs.* 2008;28(1):36–47.  
44  
45 788 125. Bravo RL. Medical Decision-Making among Foreign-Born Latino Elders with Multiple  
46  
47 789 Chronic Conditions. 2016.  
48  
49 790 126. Chi WC, Wolff J, Greer R, Dy S. Multimorbidity and Decision-Making Preferences Among  
50  
51 791 Older Adults. *Ann Fam Med.* 2017;15:546–51.  
52  
53 792 127. Collins M, Crowley R, Karlawish JHT, Casarett DJ. Are Depressed Patients More Likely to  
54  
55  
56  
57  
58  
59  
60

- 1  
2  
3 793 Share. *J Palliat Med.* 2004;7(4):527–32.  
4  
5 794 128. Ekdahl AW, Andersson L, Friedrichsen M. "They do what they think is the best for me."  
6  
7 795 Frail elderly patients' preferences for participation in their care during hospitalization.  
8  
9 796 *Patient Educ Couns.* 2010;80(2):233–40.  
10  
11 797 129. Ekdahl AW, Andersson L, Wiréhn A, Friedrichsen M. Are elderly people with co-  
12  
13 798 morbidities involved adequately in medical decision making when hospitalised? A cross-  
14  
15 799 sectional survey. *BMC Geriatr.* 2011;11(1):46.  
16  
17 800 130. Moise N, Ye S, Alcántara C, Davidson KW, Kronish I. Depressive symptoms and decision-  
18  
19 801 making preferences in patients with comorbid illnesses. *J Psychosom Res.* 2017;92:63–  
20  
21 802 6.  
22  
23 803 131. Naik AD, Street RL, Castillo D, Abraham NS. Patient Education and Counseling Health  
24  
25 804 literacy and decision making styles for complex antithrombotic therapy among older  
26  
27 805 multimorbid adults. *Patient Educ Couns.* 2011;85(3):499–504.  
28  
29 806 132. Perret-Guillaume C, Genet C, Herrmann R, Benetos A. Attitudes and Approaches to  
30  
31 807 Decision Making About Antihypertensive Treatment in Elderly Patients. *J Am Med Dir*  
32  
33 808 *Assoc.* 2011;12:121–8.  
34  
35 809 133. Weir K, Nickel B, Naganathan V, Bonner C, McCaffery K, Carter SM, et al. Decision-  
36  
37 810 Making Preferences and Deprescribing: Perspectives of Older Adults and Companions  
38  
39 811 About Their Medicines. *Journals Gerontol Ser B.* 2018 Sep 20;73(7):e98–107.  
40  
41 812 134. Belcher VN, Fried TR, Agostini J V, Tinetti ME. Views of Older Adults on Patient  
42  
43 813 Participation in Medication-related Decision Making. *J Gen Intern Med.* 2006;21:298–  
44  
45 814 303.  
46  
47 815 135. Morrow D, Weiner M, Deer MM, Young JM, Dunn S, Mcguire P, et al. Patient-Centered  
48  
49 816 Instructions for Medications Prescribed for the Treatment of Heart Failure. *Am J*  
50  
51 817 *Geriatr Pharmacother.* 2004;2(1):2–5.  
52  
53 818 136. Bayliss EA, Edwards AE, Steiner JF, Main DS. Processes of care desired by elderly  
54  
55  
56  
57  
58  
59  
60

- 1  
2  
3 819 patients with multimorbidities. *Fam Pract*. 2008 Aug;25(4):287–93.  
4  
5 820 137. Browne S, Macdonald S, May CR, Macleod U, Mair FS. Patient, Carer and Professional  
6  
7 821 Perspectives on Barriers and Facilitators to Quality Care in Advanced Heart Failure. *PLoS*  
8  
9 822 *One*. 2014;9(3):e93288.  
10  
11 823 138. Ehman KM, Deyo-svendson M, Merten Z, Kramlinger AM, Garrison GM. How  
12  
13 824 Preferences for Continuity and Access Differ Between Multimorbidity and Healthy  
14  
15 825 Patients in a Team Care Setting. *J Prim Care Community Health*. 2017;8(4):319–23.  
16  
17 826 139. Gum AM, Ph D, Iser L, Petkus A. Behavioral Health Service Utilization and Preferences of  
18  
19 827 Older Adults Receiving Home-Based Aging Services. *Am J Geriatr Psychiatry*.  
20  
21 828 2010;18(6):491–501.  
22  
23 829 140. Naganathan G, Kuluski K, Gill A, Jaakkimainen RL, Upshur R, Wodchis WP. Perceived  
24  
25 830 value of support for older adults coping with multi-morbidity : patient , informal care-  
26  
27 831 giver and family physician perspectives. *Ageing Soc*. 2016;36:1891–914.  
28  
29 832 141. Pandhi N, Schumacher J, Flynn KE, Smith M. Patients’ perceptions of safety if  
30  
31 833 interpersonal continuity of care were to be disrupted. *Heal Expect*. 2008;11:400–8.  
32  
33 834 142. Schoenborn NL, Boyd CM, Mcnabney M, Cayea D. Current Practices and Opportunities  
34  
35 835 in a Resident Clinic Regarding the Care of Older Adults with Multimorbidity. *J Am*  
36  
37 836 *Geriatr Soc*. 2015;63:1645–51.  
38  
39 837 143. Utens CM, MA GL, van Schayck OC, Rutten-van Mólken MP, van Litsenburg W, Janssen  
40  
41 838 A, et al. Patient preference and satisfaction in hospital-at-home and usual hospital care  
42  
43 839 for COPD exacerbations: Results of a randomised controlled trial. *Int J Nurs Stud*.  
44  
45 840 2013;50:1537–49.  
46  
47 841 144. Wieldraaijer T, Duineveld LAM, Donkervoort SC, Busschers WB, M VWHCP, Wind J.  
48  
49 842 Colorectal cancer patients’ preferences for type of caregiver during survivorship care.  
50  
51 843 *Scand J Prim Health Care*. 2018;36(1):14–9.  
52  
53 844 145. BATTERY AK, Carr-white G, Martin FC, Glaser K, Lowton K. Cardiac rehabilitation for heart  
54  
55  
56  
57  
58  
59  
60

- 1  
2  
3 845 failure: Do older people want to attend and are they referred? *Eur Geriatr Med*.  
4  
5 846 2014;5(4):246–51.  
6  
7 847 146. Lim CY, Des M, Berry ABL, Hirsch T, Hartzler AL, Wagner EH, et al. Understanding What  
8  
9 848 Is Most Important to Individuals with Multiple Chronic Conditions: A Qualitative Study  
10  
11 849 of Patients' Perspectives. *JGIM*. 2017;32(12):1278–84.  
12  
13  
14 850 147. Naik AD, Martin LA, Moye J, Karel MJ. Health Values and Treatment Goals of Older,  
15  
16 851 Multimorbid Adults Facing Life-Threatening Illness. *J Am Geriatr Soc*. 2016;64:625–31.  
17  
18 852 148. Robben SHM, Heinen M, Melis RJF. Care-related goals of community-dwelling frail older  
19  
20 853 adults. *JAGS*. 2011;59(8):1552–4.  
21  
22  
23 854 149. Schellinger SE, Anderson EW, Frazer MS, Cain CL. Patient Self-Defined Goals : Essentials  
24  
25 855 of Person-Centered Care for Serious Illness. *Am J Hosp Palliat Med*. 2018;35(1):159–65.  
26  
27 856 150. Case SM, Fried TR, Leary JO. How to ask: Older adults' preferred tools in health  
28  
29 857 outcome prioritization. *Patient Educ Couns*. 2013;91:29–36.  
30  
31  
32 858 151. Fried TR, Bradley EH. What Matters to Seriously Ill Older Persons Making End-of-Life  
33  
34 859 Treatment Decisions?: A Qualitative Study. *J Palliat Med*. 2003;6(2):237–44.  
35  
36  
37 860 152. Fried TR, Tinetti M, Iannone L, O'Leary JR, Towle V, Van Ness PH. Health Outcome  
38  
39 861 Prioritization as a Tool for Decision Making Among Older Persons With Multiple Chronic  
40  
41 862 Conditions. *Arch Intern Med*. 2011;171(20):1854–6.  
42  
43 863 153. Fried TR, Tinetti M, Agostini J, Iannone L, Towle V. Health outcome prioritization to  
44  
45 864 elicit preferences of older persons with multiple health conditions. *Patient Educ Couns*.  
46  
47 865 2011;83(2):278–82.  
48  
49  
50 866 154. Janssen IM, Gerhardus A, Baldamus CA, Schaller M, Barth C. Preferences of patients  
51  
52 867 undergoing hemodialysis – results from a questionnaire-based study with. *Patient*  
53  
54 868 *Prefer Adherence*. 2015;9:847–55.  
55  
56  
57 869 155. Karel MJ, Mulligan EA, Ms AW, Martin LA, Moye J, Naik AD. Valued life abilities among  
58  
59 870 veteran cancer survivors. *Heal Expect*. 2015;19:679–90.  
60

- 1  
2  
3 871 156. Tinetti ME, Mcavay AGJ, Fried TR, Allore HG, Joanna A, Salmon C, et al. Health  
4  
5 872 Outcome Priorities Among Competing Cardiovascular, Fall Injury, and Medication-  
6  
7 873 Related Symptom Outcomes. *J Am Geriatr Soc.* 2008;56:1409–16.  
8  
9  
10 874 157. van Summeren JJGT, Haaijer-ruskamp FM, Schuling J. Eliciting Preferences of  
11  
12 875 Multimorbid Elderly Adults in Family Practice Using an Outcome Prioritization Tool. *J*  
13  
14 876 *Am Geriatr Soc.* 2016;64:143–8.  
15  
16 877 158. van Summeren JJ, Schuling J, Haaijer-Ruskamp FM, Denig P. Outcome prioritisation tool  
17  
18 878 for medication review in older patients with multimorbidity: a pilot study in general  
19  
20 879 practice. *Br J Gen Pract.* 2017 Jul;67(660):e501–6.  
21  
22  
23 880 159. Kuluski K, Gill A, Naganathan G, Upshur R, Jaakkimainen RL, Wodchis WP. A qualitative  
24  
25 881 descriptive study on the alignment of care goals between older persons with multi-  
26  
27 882 morbidities, their family physicians and informal caregivers. *BMC Fam Pract.*  
28  
29 883 2013;14(1):133.  
30  
31  
32 884 160. Toto PE, Skidmore ER, Terhorst L, Rosen J, Weiner DK. Goal Attainment Scaling (GAS) in  
33  
34 885 geriatric primary care: A feasibility study. *Arch Gerontol Geriatr.* 2015;60(1):16–21.  
35  
36 886 161. Gross CP, Fried TR, Tinetti ME, Ross JS, Genao I, Hossain S, et al. Decision-making and  
37  
38 887 cancer screening: A qualitative study of older adults with multiple chronic conditions. *J*  
39  
40 888 *Geriatr Oncol.* 2014;6(2):93–100.  
41  
42  
43 889 162. Fried TR, Byers AL, Gallo WT, Ness PH Van, Towle VR, Leary JRO, et al. Prospective Study  
44  
45 890 of Health Status Preferences and Changes in Preferences Over Time in Older Adults.  
46  
47 891 *Arch Intern Med.* 2006;166:890–5.  
48  
49  
50 892 163. World Health Organization. Why palliative care is an essential function of primary  
51  
52 893 health care [Internet]. 2018. Available from: [https://www.who.int/docs/default-](https://www.who.int/docs/default-source/primary-health-care-conference/palliative.pdf?sfvrsn=ecab9b11_2)  
53  
54 894 [source/primary-health-care-conference/palliative.pdf?sfvrsn=ecab9b11\\_2](https://www.who.int/docs/default-source/primary-health-care-conference/palliative.pdf?sfvrsn=ecab9b11_2)  
55  
56  
57 895 164. Puts MTE, Tapscott B, Fitch M, Howell D, Monette J, Wan-chow-wah D, et al. A  
58  
59 896 systematic review of factors influencing older adults' decision to accept or decline  
60



- 1  
2  
3 897 cancer treatment. *Cancer Treat Rev.* 2015;41(2):197–215.  
4  
5 898 165. Puts MT, Tapscott B, Fitch M, Howell D, Monette J, Wan-chow-wah D, et al. A  
6  
7 899 Systematic Review of Factors Influencing Older Adults' Hypothetical Treatment  
8  
9 900 Decisions. *Oncol Hematol Rev.* 2015;11(1):19–33.  
10  
11 901 166. de Decker L, Annweiler C, Launay C, Fantino B, Beauchet O. Do not resuscitate orders  
12  
13 902 and aging: impact of multimorbidity on the decision-making process. *J Nutr Health*  
14  
15 903 *Aging.* 2014;18(3):330–5.  
16  
17 904 167. Singh JA, Sloan JA, Atherton PJ, Smith T, Hack TF, Huschka MM, et al. Preferred Roles in  
18  
19 905 Treatment Decision Making Among Patients With Cancer: A Pooled Analysis of Studies  
20  
21 906 Using the Control Preferences Scale. *Am J Manag Care.* 2011;16(9):688–96.  
22  
23 907 168. Vermunt NPCA, Harmsen M, Westert GP, Rikkert MGMO, Faber MJ. Collaborative goal  
24  
25 908 setting with elderly patients with chronic disease or multimorbidity: a systematic  
26  
27 909 review. *BMC Geriatr.* 2017;17:167.  
28  
29 910 169. Benzie KM, Premji S, Hayden KA, Serrett K. State-of-the-Evidence Reviews: Advantages  
30  
31 911 and Challenges of Including Grey Literature. *Worldviews Evidence-Based Nurs*  
32  
33 912 [Internet]. 2006 Jun;3(2):55–61. Available from: <http://doi.wiley.com/10.1111/j.1741->  
34  
35 913 [6787.2006.00051.x](http://doi.wiley.com/10.1111/j.1741-6787.2006.00051.x)  
36  
37 914 170. Etkind SN, Bristowe K, Bailey K, Selman LE, Murtagh FEM. How does uncertainty shape  
38  
39 915 patient experience in advanced illness? A secondary analysis of qualitative data. *Palliat*  
40  
41 916 *Med.* 2017;31(2):171–80.  
42  
43 917 171. McPherson CJ, Hadjistavropoulos T, Devereaux A, Lobchuk MM. A qualitative  
44  
45 918 investigation of the roles and perspectives of older patients with advanced cancer and  
46  
47 919 their family caregivers in managing pain in the home. *BMC Palliat Care.* 2014 Dec  
48  
49 920 8;13(1):39.  
50  
51 921 172. Piamjariyakul U, Myers S, Werkowitch M, Smith CE. End-of-life preferences and  
52  
53 922 presence of advance directives among ethnic populations with severe chronic  
54  
55  
56  
57  
58  
59  
60

- 1  
2  
3 923 cardiovascular illnesses. *Eur J Cardiovasc Nurs*. 2014;13(2):185–9.  
4  
5 924 173. Ruggiano N, Shtompel N, Whiteman K, Sias K. Influences of Transportation on Health  
6  
7 925 Decision-Making and Self-Management Behaviors among Older Adults with Chronic  
8  
9 926 Conditions. *Behav Med*. 2017;43(1):61–70.  
10  
11 927 174. Strachan PH, Carroll SL, Laats S De, Arthur HM. Patients' Perspectives on End-of-Life  
12  
13 928 Issues and Implantable Cardioverter Defibrillators. *J Palliat Care*. 2011;27(1):6–11.  
14  
15 929 175. Walker R, Science F, Dietetics P, James H, Psychology A, Psychology H, et al. Adhering to  
16  
17 930 behaviour change in older pre-dialysis populations - what do patients think? A  
18  
19 931 qualitative study. *J Ren Care*. 2012;38(1):34–42.  
20  
21 932 176. Davison SN. End-of-Life Care Preferences and Needs : Perceptions of Patients with  
22  
23 933 Chronic Kidney Disease. *Clin J Am Soc Nephrol*. 2010;5:195–204.  
24  
25 934 177. Elie D, Marino A, Torres-Platas SG, Noohi S, Semeniuk T, Segal M, et al. End-of-Life Care  
26  
27 935 Preferences in Patients with Severe and Persistent Mental Illness and Chronic Medical  
28  
29 936 Conditions: A Comparative Cross-Sectional Study. *Am J Geriatr Psychiatry*. 2018  
30  
31 937 Jan;26(1):89–97.  
32  
33 938 178. Flynn KE, Smith MA. Personality and Health Care Decision-Making Style. *J Geront B*  
34  
35 939 *Psychol Sci Soc Sci*. 2007;62(5):261–7.  
36  
37 940 179. Fried TR, Gillick MR. Medical Decision-Making in the Last Six Months of Life: Choices  
38  
39 941 about Limitation of Care. *J Am Geriatr Soc*. 1994;42:303–7.  
40  
41 942 180. Fried TR, Bradley EH, Towle VR, Allore H. Understanding the Treatment Preferences of  
42  
43 943 Seriously Ill Patients. *N Engl J Med*. 2002 Apr 4;346(14):1061–6.  
44  
45 944 181. Fried TR, Tinetti ME, Iannone L, O'Leary JR, Towle V, Van Ness PH. Health Outcome  
46  
47 945 Prioritization as a Tool for Decision Making Among Older Persons With Multiple Chronic  
48  
49 946 Conditions. *Arch Intern Med*. 2011;171(20):1854–6.  
50  
51 947 182. Janssen D, Curtis JR, Au DH, Spruit MA, Downey L, Engelberg RA. Patient–clinician  
52  
53 948 communication about end-of-life care for Dutch and US patients with COPD. *Eur Respir*  
54  
55  
56  
57  
58  
59  
60

- 1  
2  
3 949 J. 2011;38(2):268–76.  
4  
5 950 183. Janssen DJA, Spruit MA, Schols JMGA. Insight Into Advance Care Planning for Patients  
6  
7 951 on Dialysis. *J Pain Symptom Manage*. 2013;45(1):104–13.  
8  
9 952 184. Junius-Walker U, Wiese B, Klaaßen-Mielke R, Theile G, Müller CA, Hummers-Pradier E.  
10  
11 953 Older patients' perceived burdens of their health problems: a cross-sectional analysis in  
12  
13 954 74 German general practices. *Patient Prefer Adherence*. 2015;9:811–20.  
14  
15  
16 955 185. Lee JSW, Lam LCW, Tang CSH. Attitudes of Demented and Non-demented Chinese  
17  
18 956 Elderly Subjects Towards End-of-life Decision Making. *Hong Kong J Psychiatry*.  
19  
20 957 2006;16(2):45–9.  
21  
22  
23 958 186. Maida V, Peck J, Ennis M, Brar N, Maida AR. Preferences for active and aggressive  
24  
25 959 intervention among patients with advanced cancer. *BMC Cancer*. 2010;10:592.  
26  
27 960 187. Rodriguez KL, Appelt CJ, Switzer GE, Sonel AF. perceived involvement in care for chronic  
28  
29 961 heart failure. *Hear Lung*. 2008;37:440–8.  
30  
31  
32 962 188. Sudore RL, Schillinger D, Knight SJ, Fried TR, Sudore RL, Schillinger D, et al. Uncertainty  
33  
34 963 About Advance Care Planning Treatment Preferences Among Diverse Older Adults  
35  
36 964 Uncertainty About Advance Care Planning Treatment Preferences Among Diverse Older  
37  
38 965 Adults. *J Health Commun*. 2010;15:159–71.  
39  
40  
41 966 189. Tamura MK, Goldstein MK, Eliseo JP. Preferences for dialysis withdrawal and  
42  
43 967 engagement in advance care planning within a diverse sample of dialysis patients.  
44  
45 968 *Nephrol Dial Transpl*. 2010;25:237–42.  
46  
47  
48 969 190. Adams R, May H, Swift L, Bhattacharya D. Do older patients find multi-compartment  
49  
50 970 medication devices easy to use and which are the easiest? *Age Ageing*. 2013;42:715–  
51  
52 971 20.  
53  
54  
55 972

56  
57 973 **ACKNOWLEDGMENTS**  
58  
59  
60

1  
2  
3 974 The authors would like to thank Katharina Kunzweiler for her support in the literature  
4  
5 975 screening process, as well as Jessica Comilang for her assistance in providing full texts of the  
6  
7 976 screened studies and Pauline Philipp for her support in contacting authors of conference  
8  
9 977 proceedings manuscripts.  
10  
11  
12

### 13 978 **CONTRIBUTORS**

14  
15  
16 979 AIG wrote the initial draft of the protocol. CM is the guarantor of the review. CS and JM  
17  
18 980 provided methodological guidance and revisions to the manuscript. EM developed and carried  
19  
20 981 out the search strategy. CS and JN assisted in the identification of databases and the search  
21  
22 982 strategy. AIG and JN screened the studies, extracted the data and performed content analysis.  
23  
24 983 AIG summarised descriptives, and TN and JN assisted with figures. JB, MvA, TN, JN, OW, KR,  
25  
26 984 TH, FG and SS are co-supervisors of this project, provided advice at all stages of the  
27  
28 985 development of the protocol, and contributed to the revision of the manuscript. All authors  
29  
30 986 read and approved the final manuscript.  
31  
32  
33

### 34 987 **FUNDING**

35  
36  
37 988 This work was supported by the German Federal Ministry of Education and Research, grant  
38  
39 989 number 01GL1729.  
40  
41  
42

### 43 990 **DISCLAIMER**

44  
45  
46 991 The funder had no role in developing the protocol for this review.  
47  
48

### 49 992 **COMPETING INTERESTS**

50  
51  
52 993 None declared  
53  
54

### 55 994 **DATA SHARING**

56  
57  
58 995 No additional data available.  
59  
60

1  
2  
3  
4  
5  
6  
7  
8  
9  
10  
11  
12  
13  
14  
15  
16  
17  
18  
19  
20  
21  
22  
23  
24  
25  
26  
27  
28  
29  
30  
31  
32  
33  
34  
35  
36  
37  
38  
39  
40  
41  
42  
43  
44  
45  
46  
47  
48  
49  
50  
51  
52  
53  
54  
55  
56  
57  
58  
59  
60

996 **PATIENT AND PUBLIC INVOLVEMENT**

997 Not required.

998 **WORD COUNT**

999 3372

For peer review only

**Table 1. Key characteristics of the included studies.****Table 1a. Key characteristics – Qualitative cross-sectional studies (observational)**

| Source              | Study methods                                                                                                                                                          |                                                |                 | Patient population                       |                 |                       |                 |
|---------------------|------------------------------------------------------------------------------------------------------------------------------------------------------------------------|------------------------------------------------|-----------------|------------------------------------------|-----------------|-----------------------|-----------------|
|                     | Study aim                                                                                                                                                              | Setting, country                               | Data collection | Def of MM                                | Sample (number) | Age: Mean (SD); range | Sex (% females) |
| Bayliss, 2008 (136) | To explore processes of care desired by elderly patients with MM, and that may present competing demands for patients and providers                                    | Population based; USA                          | ssl (f2f)       | ≥ 2 chronic conditions                   | 26              | 65-84                 | 50              |
| Belcher, 2006 (134) | To explore the views of older adults regarding participation in medication decision-making                                                                             | GP & Hospital (outpatient) & Nursing home; USA | ssl (f2f)       | ≥ 2 chronic conditions + ≥ 1 medications | 51              | 77; 65-89             | 63              |
| Beverly, 2008 (94)  | To define, identify, and rank the values and preferences that older adults express in their diabetes care                                                              | Population based; USA                          | FG              | Type 2 diabetes + ≥ 1 comorbidity        | 35              | 75; 60-88             | 57              |
| Beverly, 2011 (95)  | To explore the perceived impact of chronic co-morbid conditions on type 2 diabetes self-management in older patients                                                   | Population based; USA                          | FG              | Type 2 diabetes + ≥ 1 comorbidity        | 32              | 75 (7); 60-88         | 56              |
| Bower, 2012 (96)    | To examine patients' representations of multimorbid long-term conditions and assess how models of illness representation might need modification in the presence of MM | GP; UK                                         | ssl (f2f)       | ≥ 2 chronic conditions                   | 28              | Median 66; 39-89      | 43              |
| Bravo, 2017 (125)   | To identify typologies of decision-making with foreign-born Latino elders with MM who have enrolled in an integrative geriatric health care program                    | Nursing home; USA                              | ssl (f2f)       | ≥ 2 chronic conditions                   | 13              | 75; 65-85             | 77              |
| Brown, 2007 (104)   | To describe how goals for the self-management of hypertension are developed and whether or not they conform to the characteristics of effective goal-setting           | Hospital (outpatient); USA                     | I (f2f)         | Hypertension + comorbidities             | 30              | 70 (9); 50-87         | 100             |

|                            |                                                                                                                                                                                                                                                                     |                                  |                |                                                                   |    |                        |    |
|----------------------------|---------------------------------------------------------------------------------------------------------------------------------------------------------------------------------------------------------------------------------------------------------------------|----------------------------------|----------------|-------------------------------------------------------------------|----|------------------------|----|
| Browne, 2014 (137)         | To examine patient, carer, and professional perspectives on current management of advanced CHF, as well as barriers and facilitators to improved care                                                                                                               | GP & Hospital (inpatient); UK    | FG & ssl (f2f) | CHF (severe)                                                      | 30 | 72; 60-86              | 27 |
| Caldwell, 2007 (39)        | To identify the preferences of patients with advanced CHF regarding communication about their prognosis and its implications                                                                                                                                        | Hospital (outpatient); Canada    | I (f2f)        | CHF (severe)                                                      | 20 | 68; 50-84              | 30 |
| Caughey, 2017 (108)        | To examine how older patients with MM and clinicians balance benefits and harms associated with a medication and in the presence of competing health outcomes                                                                                                       | Hospital (outpatient); Australia | I (f2f)        | ≥2 chronic conditions                                             | 15 | Median; IQR: 79; 73-86 | 53 |
| Cheraghi-Sohi, 2013 a (97) | To explore how patients prioritise their osteoarthritis among all their conditions, which factors underlie this prioritisation, and whether and why these priorities change over time                                                                               | Hospital (outpatient); UK        | 2a             | ≥ 2 chronic conditions<br>Osteoarthritis                          | 30 | 69; 55-86              | 60 |
| Cheraghi-Sohi, 2013 b (98) | To explore how and why people with MM prioritise some long-term conditions over others, what the potential implications may be for self-management activity, and, in turn, suggest how such information may help clinicians negotiate the management of MM patients | GP; UK                           | 2a             | ≥ 2 chronic conditions<br>Osteoarthritis                          | 41 | 68; 39-83              | 44 |
| Clover, 2004 (51)          | To report on a study exploring patients' understanding of their discussions about end-of-life care with nurses in a palliative care setting                                                                                                                         | Hospital (outpatient); Australia | I (f2f)        | Terminal illness                                                  | 11 | 74; 57-85              | 36 |
| DiNapoli, 2016 (106)       | To explore middle-aged and older veterans' current disease-management practices, mental health treatment preferences, and challenges they face in living with MM                                                                                                    | GP; USA                          | ssl (f2f)      | ≥2 score (cumulative Illness Rating Scale for Geriatrics)         | 28 | 64 (6)                 | 21 |
| Ekdahl, 2010 (128)         | To deepen the knowledge of frail elderly patients' preferences for participation in medical decision-making during hospitalisation                                                                                                                                  | Hospital (inpatient); Sweden     | ssl (f2f)      | ≥ 3 chronic conditions                                            | 15 | 84; 75-96              | 67 |
| Etkind, 2017 (170)         | To understand patient experiences of uncertainty in advanced illness and develop a typology of patients' responses and preferences to inform practice                                                                                                               | Hospital (outpatient); UK        | 2a             | Seriously ill patients<br>CHF, COPD, CKD, liver disease or cancer | 30 | 75; 43-95              | 40 |

|                                 |                       |                                                                                                                                                                                                                                  |                                            |                |                                                                 |    |                                                     |    |
|---------------------------------|-----------------------|----------------------------------------------------------------------------------------------------------------------------------------------------------------------------------------------------------------------------------|--------------------------------------------|----------------|-----------------------------------------------------------------|----|-----------------------------------------------------|----|
| 1<br>2<br>3<br>4<br>5<br>6<br>7 | Fix, 2014 (92)        | To understand barriers to hypertension self-management in patients with hypertension and comorbidities                                                                                                                           | GP; USA                                    | ssl (f2f)      | Hypertension + $\geq 1$ comorbidity                             | 48 | 60 (10)                                             | 10 |
| 8<br>9<br>10<br>11              | Fried, 2003 (151)     | To elicit from patients themselves the aspects of treatment decision-making that are most important to them when making end-of-life treatment decisions                                                                          | Hospital (outpatient); USA                 | FG & ssl (f2f) | Seriously ill patients CHF, COPD, CKD or cancer                 | 23 | 70; 60-84                                           | 35 |
| 12<br>13<br>14<br>15<br>16      | Fried, 2008 (53)      | To examine the ways in which older persons with MM think about potentially competing outcomes in order to gain insight into how processes to elicit values regarding these outcomes can be grounded in the patient's perspective | Community; USA                             | FG             | $\geq 5$ medications                                            | 66 | 75 (6)                                              | 67 |
| 17<br>18<br>19<br>20<br>21      | Green, 2015 (115)     | To examine older adults' attitudes towards ICD implantation in the context of competing health risks and to explore the determinants of ICD decision-making among a group of patients who had faced the decision in the past     | Hospital (outpatient); USA                 | ssl (tel.)     | ICD + comorbidities + Geriatric syndromes mean (SD): 6.9 (2.7). | 44 | 78 (5)                                              | 29 |
| 22<br>23<br>24<br>25<br>26      | Gross, 2015 (161)     | To understand how older persons with MM approach decisions about cancer screening                                                                                                                                                | Hospital (outpatient), USA                 | ssl (f2f)      | $\geq 2$ chronic conditions + $\geq 5$ medications              | 28 | 65-75: 57%<br>76-85: 4%<br>>86: 21%<br>Unknown: 18% | 82 |
| 27<br>28<br>29                  | Hansen, 2015 (99)     | To identify reasons for disagreement between patients and their GPs on illnesses                                                                                                                                                 | GP; Germany                                | FG             | $\geq 3$ chronic conditions                                     | 21 | 77; 70-88                                           | 48 |
| 30<br>31<br>32<br>33            | Haverhals, 2011 (100) | To understand the medication self-management issues faced by older adults and caregivers that can be addressed by an electronic personal health application                                                                      | Hospital (outpatient) & Nursing homes; USA | FG & ssl (f2f) | $\geq 2$ chronic condition + $\geq 3$ medications               | 32 | 82; 73-90                                           | 60 |
| 34<br>35<br>36<br>37<br>38      | Huang, 2005 (55)      | To explore self-reported healthcare goals, factors influencing these goals, and self-care practices of older patients with diabetes mellitus                                                                                     | GP; USA                                    | ssl (f2f)      | T2 diabetes + hypertension or hypercholesterolemia              | 28 | 74; 65-88                                           | 57 |



|                       |                                                                                                                                                                                                                                   |                                                        |                |                                                   |    |                                |    |
|-----------------------|-----------------------------------------------------------------------------------------------------------------------------------------------------------------------------------------------------------------------------------|--------------------------------------------------------|----------------|---------------------------------------------------|----|--------------------------------|----|
| Jones, 2015 (56)      | To assess barriers and facilitators to the use of a patient decision aid designed for serious illness                                                                                                                             | Hospital (outpatient); USA                             | FG             | Seriously ill patients                            | 12 | 66; 28-96                      | 66 |
| Kuluski, 2013 (159)   | To compare goals across each patient, caregiver and physician triad to determine alignment                                                                                                                                        | GP; Canada                                             | ssl (f2f)      | ≥ 2 chronic conditions                            | 27 | 82 (8)                         | 44 |
| Lim, 2017 (146)       | To identify what patients with MM describe as most important to their well-being and health                                                                                                                                       | GP; USA                                                | ssl (f2f)      | Type 1 or 2 diabetes + ≥ 2 chronic conditions     | 31 | 69                             | 45 |
| Lindsay, 2009 (86)    | To examine how patients self-manage MM and especially how they prioritise their conditions                                                                                                                                        | GP; UK                                                 | FG             | Mean conditions: 3.3 (2-8)                        | 53 | 63                             | 45 |
| Linsky, 2015 (40)     | To identify patient perspectives on intentional medication discontinuation in order to optimise medication use                                                                                                                    | GP; USA                                                | FG & ssl (f2f) | ≥ 5 medications                                   | 27 | 66                             | 19 |
| Lyle, 2017 (123)      | To explore older people's experiences of living with neurogenic claudication, their preferences for physiotherapy treatment provision and associated outcomes in order to inform an intervention to be tested in a clinical trial | Hospital (outpatient); UK                              | ssl (f2f)      | Lumbar spinal stenosis + comorbidities            | 15 | 75; 69-80                      | 40 |
| Manias, 2007 (101)    | To investigate perceptions of and experiences with managing drug regimens from the perspectives of patients with osteoarthritis and coexisting chronic conditions and of healthcare professionals from diverse backgrounds        | Hospital outpatient & consumer organisation; Australia | FG             | Osteoarthritis + comorbidities                    | 34 | male: 75 (4)<br>female: 67 (9) | 79 |
| McKillop, 2013 (42)   | To explore attitudes towards medicines, polypharmacy and adherence in patients with CKD                                                                                                                                           | Hospital (outpatient); UK                              | ssl (f2f)      | CKD                                               | 10 | 60; 29-82                      | 50 |
| McPherson, 2014 (171) | To explore and describe patients' and caregivers' perspectives and roles concerning pain management at home                                                                                                                       | Community; Canada                                      | ssl (f2f)      | Advanced cancer receiving palliative care at home | 18 | 78 (9)                         | 56 |
| Moen, 2009 (102)      | To conduct an exploratory study describing multiple medicine use from the elderly patient's perspective                                                                                                                           | Population based; Sweden                               | FG             | ≥ 5 medications                                   | 59 | 76; 67-88                      | 51 |
| Morrow, 2004 (135)    | To describe patient-centred instructions for taking CHF medications that were developed as part of a multifaceted pharmacy-based intervention to improve                                                                          | GP; USA                                                | FG             | CHF                                               | 16 | 64                             | 69 |

|                              |                                                                                                                                                                 |                              |           |                                                                                           |     |                                                                       |     |
|------------------------------|-----------------------------------------------------------------------------------------------------------------------------------------------------------------|------------------------------|-----------|-------------------------------------------------------------------------------------------|-----|-----------------------------------------------------------------------|-----|
|                              | medication adherence and health-related outcomes among older adults with CHF                                                                                    |                              |           |                                                                                           |     |                                                                       |     |
| Morrow, 2008 (44)            | To investigate the life and health goals of older adults with diabetes, and to explore the factors that influence their diabetes self-management                | GP; USA                      | ssl (f2f) | Diabetes + hypertension + comorbidities                                                   | 24  | 69                                                                    | 38  |
| Naganathan, 2016 (140)       | To understand how patients, informal caregivers and family physicians perceive the value of various formal and informal supports for older adults with MM       | GP; Canada                   | ssl (f2f) | ≥ 2 chronic conditions                                                                    | 27  | 82 (8)                                                                | 43  |
| Naik, 2016 (147)             | To identify a taxonomy of health-related values that frame goals of care of older, MM adults who recently faced cancer diagnosis and treatment                  | Hospital (outpatient); USA   | I (n.a.)  | Colorectal, head and neck, gastric, or oesophageal cancers<br>Deyo comorbidity index 6.85 | 146 | 65                                                                    | 2   |
| Noël, 2005 (45)*             | To explore collaborative care needs and preferences in primary care patients with MM                                                                            | GP; USA                      | FG        | ≥ 2 chronic conditions                                                                    | 60  | 30-80                                                                 | 20  |
| O'Dell, 2008 (124)           | To increase understanding of the views of frail elderly women in residential care related to quality of life, values, and preferences for pelvic floor care     | Hospital (outpatient); USA   | ssl (f2f) | "Assisted living or long-term care"                                                       | 25  | Assisted living participants: 87; 73-96;<br>Long term care: 81; 65-89 | 100 |
| Pages-Puigdemont, 2016 (103) | To explore factors that impact on drug compliance and to identify strategies to improve it from the perspective of patients with at least one chronic condition | Hospital (outpatient); Spain | FG        | ≥ 1 chronic condition<br>Mean comorbidities: 2.3 (1.7)                                    | 36  | 65; 39-90                                                             | 53  |
| Parks, 2014 (117)            | To explore sociocultural factors that might influence African American and Hispanic patients' decisions regarding joint replacement                             | Hospital (outpatient); USA   | ssl (f2f) | Osteoarthritis + comorbidities                                                            | 36  | 68 (10)                                                               | 80  |
| Piamjariyakul, 2014 (172)    | To explore end-of-life preferences and determine the presence of signed end-of-life advanced directives                                                         | Community; USA               | I (f2f)   | Cardiovascular disease (severe) + comorbidities                                           | 30  | 70                                                                    | 67  |

|                         |                                                                                                                                                                                                                                               |                                  |            |                                                          |     |                   |    |
|-------------------------|-----------------------------------------------------------------------------------------------------------------------------------------------------------------------------------------------------------------------------------------------|----------------------------------|------------|----------------------------------------------------------|-----|-------------------|----|
| Proctor, 2008 (93)      | To examine older adults' perceptions of depression among co-occurring social, medical, and functional problems and to compare the priority of depression with that of other problems                                                          | Community; USA                   | ssl (f2f)  | Depression + comorbidities (86%)                         | 40  | 74 (6)            | 90 |
| Richardson, 2016 (89)   | To identify and elaborate a range of factors that influence how and why patients with comorbid chronic conditions prioritise their conditions                                                                                                 | GP & Hospital (outpatient); USA  | ssl (f2f)  | Comorbidities mean (range): 6 (3-11)                     | 33  | 61-70: 67%        | 6  |
| Rifkin, 2010 (47)       | To find out how patients prioritise their medical conditions or decide which medications to take                                                                                                                                              | Hospital (outpatient); USA       | ssl (f2f)  | CKD (stages 3-5D)                                        | 20  | 72; 55-84         | 60 |
| Ruggiano, 2017 (173)    | To expand current knowledge in the area of chronic health self-management, this study examined perceptions of transportation and health self-management among older adults with chronic conditions (i.e., chronic illnesses and disabilities) | Community; USA                   | ssl (f2f)  | ≥2 chronic conditions (82%)                              | 37  | 77; 60-97         | 68 |
| Schellinger, 2018 (149) | To examine whole-person goals of patients with serious illness identified during their last 2 to 3 years of life                                                                                                                              | Community; USA                   | I (f2f)    | CHF, cancer and dementia comorbidity score (SD): 5 (1.5) | 160 | 79 (11)           | 48 |
| Schoenberg, 2009 (91)   | Focusing on elders with two or more chronic conditions and low socioeconomic status, to investigate which morbidities older adults prioritise, why, and how they accommodate these conditions.                                                | Community; USA                   | ssl (f2f)  | ≥2 chronic conditions                                    | 41  | 70; 55-90         | 85 |
| Schoenborn, 2015 (142)  | To characterise current practice and opportunities for improvement in the care of older adults with MM in an internal medicine residency clinic                                                                                               | Hospital (inpatient); USA        | I (f2f)    | ≥2 chronic conditions                                    | 30  | 74 (7)            | 73 |
| Seah, 2015 (113)        | To gain insight into the decision-making process leading to opting out of dialysis and experience with conservative non-dialytic management from the patients' perspective                                                                    | Hospital (outpatient); Singapore | ssl (f2f)  | CKD (end-stage)                                          | 9   | Median: 81; 61-84 | 44 |
| Song, 2013 (48)         | To address patient perspectives on the extent of information provided and how decisions to start dialysis are made                                                                                                                            | Hospital (outpatient); USA       | ssl (tel.) | CKD (dialysis) + CCI ≥ 5-6                               | 99  | 61 (12); 28-89    | 53 |

|                      |                                                                                                                                                                                                      |                                        |           |                          |     |            |    |
|----------------------|------------------------------------------------------------------------------------------------------------------------------------------------------------------------------------------------------|----------------------------------------|-----------|--------------------------|-----|------------|----|
| Stapleton, 2005 (72) | To understand how the association between preferences for life-sustaining treatment and depression or quality of life is important in providing care                                                 | Hospital (outpatient); USA             | I (f2f)   | COPD (Oxygen-prescribed) | 101 | 67; 59-74  | 23 |
| Strachan, 2011 (174) | To examine patients' perspectives on related end-of-life issues                                                                                                                                      | Hospital (outpatient); Canada          | I (f2f)   | ICD + comorbidities      | 30  | 63; 26-87  | 20 |
| Tariman, 2014 (49)   | To examine patient perspectives with regard to the personal and contextual factors relevant to treatment decision-making                                                                             | Hospital (outpatient); USA             | ssl (f2f) | Multiple Myeloma         | 20  | 65 (8)     | 60 |
| Visser, 2009 (114)   | To explore the considerations taken into account by patients making decisions concerning renal replacement therapy                                                                                   | Hospital (outpatient); The Netherlands | I (f2f)   | CKD + comorbidities      | 14  | 77 (7)     | 43 |
| Walker, 2012 (175)   | To explore the experiences of patients attempting to integrate lifestyle changes into their lives                                                                                                    | Hospital (outpatient); UK              | ssl (f2f) | CKD (Stage 4)            | 9   | 76         | 56 |
| Weir, 2017 (133)     | To explore decision-making about polypharmacy among older adults and their companions                                                                                                                | Hospital (outpatient); Australia       | ssl (f2f) | CCI 1-5+: 80%            | 30  | 83; 75-85+ | 63 |
| Zulman, 2015 (105)*  | To understand self-management and health care navigation challenges that patients face due to MM and to identify opportunities to support these patients through new and enhanced eHealth technology | GP; USA                                | FG        | ≥ 3 chronic conditions   | 53  | 59 (11)    | 26 |

**Table 1b. Key characteristics – Qualitative longitudinal studies (observational)**

| Source             | Study methods                                                                                                                                                      |                                       |                 | Patient population            |                 |                         |                 |
|--------------------|--------------------------------------------------------------------------------------------------------------------------------------------------------------------|---------------------------------------|-----------------|-------------------------------|-----------------|-------------------------|-----------------|
|                    | Study aim                                                                                                                                                          | Setting, country                      | Data collection | Def of MM                     | Sample (number) | Age: Mean (SD) or range | Sex (% females) |
| Baxter, 2012 (29)* | To increase understanding of disabled and chronically ill people's experiences of revisiting choices by considering events that prompted people to reconsider them | Hospital (outpatient) & Community; UK | I (f2f)         | Chronic conditions + disabled | 20              | 65+: 35%                | 75              |

|                                      |                        |                                                                                                                                                                                                                |                                            |                 |                        |     |           |    |
|--------------------------------------|------------------------|----------------------------------------------------------------------------------------------------------------------------------------------------------------------------------------------------------------|--------------------------------------------|-----------------|------------------------|-----|-----------|----|
| 1<br>2<br>3<br>4<br>5<br>6<br>7<br>8 | Klindtworth, 2015 (62) | To understand how old and very old patients with advanced CHF perceive their disease and to identify their medical, psychosocial and information needs, focusing on the last stages of life                    | Hospital (inpatient & outpatient); Germany | I (f2f)         | CHF (severe)           | 25  | 85;71-98  | 56 |
| 9<br>10<br>11                        | Morris, 2011 (30)*     | To examine what influences self-management priorities in individuals with multiple long-term conditions and how these change over time                                                                         | GP; UK                                     | ssl (f2f, tel.) | ≥ 3 chronic conditions | 21  | 50; 36-84 | 48 |
| 12<br>13<br>14<br>15<br>16           | Pardon, 2009 (46)      | To identify preferences of advanced lung cancer patients to receive information and participate in decision-making concerning treatment options, health-care-setting transfers and end-of-life decision-making | Hospital (outpatient); Belgium             | ssl (f2f)       | Advanced lung cancer   | 128 | 64; 41-86 | 20 |

**Table 1c. Key characteristics – Quantitative cross-sectional studies (observational)**

| Source                | Study methods                                                                                                                                                                                                                    |                           |                 | Patient population     |                 |                                      |                 |
|-----------------------|----------------------------------------------------------------------------------------------------------------------------------------------------------------------------------------------------------------------------------|---------------------------|-----------------|------------------------|-----------------|--------------------------------------|-----------------|
|                       | Study aim                                                                                                                                                                                                                        | Setting, country          | Data collection | Def of MM              | Sample (number) | Age: Mean (SD) or range              | Sex (% females) |
| Ainslie, 1994 (37)**  | To examine hypotheses that elderly persons refusing minimally described treatment might choose nonaggressive treatment if options were described, and that persons refusing treatment would want an active decision- making role | Community; USA            | S               | ≥2 chronic conditions  | 116             | [older patients]                     | 75              |
| Buttery, 2014 (145)   | To investigate older CHF patients’ preferences from hospital, community and home-based service models, and sociodemographic and clinical factors associated with these preferences                                               | Hospital (inpatient); UK  | S               | CHF (moderate-severe)  | 106             | 78 (7)                               | 38              |
| Chanouzas, 2012 (110) | To examine how patient choice of different treatment modalities [haemodialysis, peritoneal dialysis and conservative management] is influenced by personal and demographic parameters                                            | Hospital (outpatient); UK | S               | CKD (pre-dialysis)     | 118             | 67 (14)                              | 48              |
| Chi, 2017 (126)       | To explore preferences for health care decision making among older adults, and identify MM profiles associated                                                                                                                   | Population based; USA     | S               | ≥ 2 chronic conditions | 2,017           | 65-74: 55%<br>75-84: 34%<br>≥85: 12% | 57              |

|                      |                                                                                                                                                                                                                                                            |                               |          |                                   |                   |                           |                   |
|----------------------|------------------------------------------------------------------------------------------------------------------------------------------------------------------------------------------------------------------------------------------------------------|-------------------------------|----------|-----------------------------------|-------------------|---------------------------|-------------------|
|                      | with preferring less active, i.e., passive, participation among older US adults                                                                                                                                                                            |                               |          |                                   |                   |                           |                   |
| Chiu, 2016 (50)      | To determine the Decision Control Preferences (DCP) of diverse, older adults and whether DCPs are associated with participant characteristics, advance care planning, and communication satisfaction                                                       | Hospital (outpatient); USA    | S        | ≥ 2 chronic conditions            | 146               | 71 (10)                   | 41                |
| Collins, 2004 (127)  | To determine whether psychological variables, particularly depression, influence patients' willingness to share medical decisions with family members or friends                                                                                           | Hospital (outpatient); USA    | lc (f2f) | Seriously ill patients<br>CCI ≥ 5 | 95                | 70; 44-85                 | 2                 |
| Davison, 2010 (176)  | To evaluate end-of-life care preferences of CKD patients to help identify gaps between current end-of-life care practice and patients' preferences and to help prioritise and guide future innovation in end of-life care policy                           | Hospital (outpatient); Canada | S        | CKD (stage 4 and 5)               | 584               | 68 (14)                   | 46                |
| De Vries, 2015 (109) | To assess whether patients' willingness to add a blood pressure-lowering drug and the importance they attach to specific treatment characteristics differ among age groups in patients with type 2 diabetes                                                | Community; The Netherlands    | S        | Diabetes + Hypertension           | 151               | 68 (9)                    | 42                |
| Downey, 2013 (79)    | To investigate patient preferences for life-sustaining therapies, clinicians' accuracy in understanding those preferences, and predictors of patient preference and clinician error                                                                        | GP; USA                       | S        | COPD                              | 196               | 69 (10); 39-91            | 0                 |
| Ehman, 2017 (138)    | To test if multimorbidity patients may value continuity more highly than healthy patients, and thus may prefer to wait to see their primary care physician (PCP)                                                                                           | GP; USA                       | S        | MM<br>Tier score: 3 or 4          | 193               | 62 (65+: 119)             | 58                |
| Ekdahl, 2011 (129)   | To investigate the preferred and the actual degree of control, i.e. the role elderly people with co-morbidities wish to assume and actually had with regard to information and participation in medical decision making during their last stay in hospital | Hospital (inpatient); Sweden  | S        | ≥ 3 chronic conditions            | 156               | 83; 76-98                 | 51                |
| Elie, 2018 (177)     | To compare SPMI and CMI patients' end-of-life care preferences and comfort level with end-of-life care discussions, and identify potential predictors of interest in medical assistance in dying                                                           | Hospital (outpatient); Canada | S        | SPMI and CMI                      | SPMI; 106; CMI 95 | SPMI 66 (13); CMI 63 (13) | SPMI: 63; CMI: 60 |

|                      |                                                                                                                                                                                                                                                            |                                        |          |                                                                     |       |                                      |    |
|----------------------|------------------------------------------------------------------------------------------------------------------------------------------------------------------------------------------------------------------------------------------------------------|----------------------------------------|----------|---------------------------------------------------------------------|-------|--------------------------------------|----|
| Flynn, 2007 (178)    | To explore relationships between five factors of personality and four preference types that account for multiple components of the health care decision-making process (information exchange, deliberation, and selection of treatment choice)             | Population based; USA                  | S        | Mean OARS conditions: 3.8 (2.5);<br>Mean medications: 2.8 (2.5)     | 5,830 | 64 (1)                               | 54 |
| Fox, 2018 (122)      | To explore older hospitalised patients' perceived acceptability of, and preference for, two low-intensity early activity interventions (bed-to-sitting and sitting-to-walking), and characteristics associated with perceived acceptability and preference | Hospital (inpatient); Canada           | S        | ≥2 chronic conditions                                               | 60    | 79 (8)                               | 53 |
| Fried, 1994 (179)    | To characterise the limitation of care in routine geriatric practice in advance of and at the time of a patient's final episode of illness.                                                                                                                | GP; USA                                | Chart    | Seriously ill patients<br>CHF, COPD, CKD or cancer                  | 59    | 84 (8)                               | 85 |
| Fried, 2002a (180)   | To examine the effects of the burden of treatment and a variety of possible outcomes on the preferences for care expressed by older patients with serious illnesses                                                                                        | Hospital (inpatient & outpatient); USA | lc (f2f) | Seriously ill patients<br>CHF, COPD, CKD or cancer                  | 226   | 73 (7)                               | 43 |
| Fried, 2002b (81)    | To develop a patient-centred measure of treatment preference applicable across a range of diseases and treatment decisions                                                                                                                                 | Hospital (inpatient & outpatient); USA | Survey   | Seriously ill patients<br>CHF, COPD, CKD or cancer                  | 125   | 73 (7)                               | 43 |
| Fried, 2011a (181)** | To explore the use of a simple tool to elicit older persons' health outcome priorities                                                                                                                                                                     | GP; USA                                | lc (f2f) | ≥ 4 chronic conditions (69%)<br>+ ≥ 4 medications (49%)             | 357   | [older patients]                     | 75 |
| Fried, 2011b (153)   | To develop and test a simple tool to elicit the preferences of older persons based on prioritisation of universal health outcomes                                                                                                                          | Community housing; USA                 | lc (f2f) | Hypertension + fall risk<br>Mean chronic conditions (SD): 2.9 (1.1) | 81    | 65-74: 16%<br>75-84: 54%<br>85+: 30% | 69 |
| Girones, 2012 (119)  | To examine the relationships between preferences and chemotherapy use in this group of patients                                                                                                                                                            | Hospital (inpatient); Spain            | S        | Lung cancer + comorbidities (84%).                                  | 83    | 77; 70-91                            | 24 |

|                       |                                                                                                                                                                                                                                |                                              |   |                                                                                          |       |                                     |                      |
|-----------------------|--------------------------------------------------------------------------------------------------------------------------------------------------------------------------------------------------------------------------------|----------------------------------------------|---|------------------------------------------------------------------------------------------|-------|-------------------------------------|----------------------|
| Green, 2016 (116)     | To explore patients' perceptions of their decision-making experiences related to ICDs                                                                                                                                          | Hospital (outpatient); USA                   | S | ICD + comorbidities (71%)                                                                | 295   | 65-74: 25%<br>75-84: 23%<br>85+: 3% | 22                   |
| Gum, 2010 (139)       | To examine use of behavioural health services, treatment preferences, and facilitators and barriers to service use in older adults receiving home-based services within the aging network                                      | Aging network agencies; USA                  | S | ≥ 2 chronic conditions<br>No medication group: 4.4 (2.1);<br>Medication group: 5.7 (2.8) | 142   | 75 (8)                              | 80                   |
| Hamelinck, 2016 (120) | To examine patients' preferences for adjuvant chemotherapy and adjuvant hormonal therapy, factors related to minimally required benefit, and patients' self-reported motivations                                               | Hospital (outpatient); The Netherlands       | S | Advanced cancer + comorbidities                                                          | 81    | Median: 61;<br>42-86                | 100                  |
| Hopper, 2016 (54)     | Use questionnaires to examine the attitudes of patients and prescribing clinicians to medication withdrawal                                                                                                                    | Hospital (inpatient & outpatient); Australia | S | CHF + ≥ 5 medications                                                                    | 85    | 61 (12)                             | 27                   |
| Janssen, 2011 (182)   | To assess life-sustaining treatment preferences, advance care planning, and the quality of end-of-life care communication in Dutch outpatients with clinically stable but severe COPD or CHF                                   | Hospital (outpatient); The Netherlands       | S | COPD or CHF (severe)                                                                     | 185   | COPD 66 (9); CHF: 76 (8)            | COPD: 38;<br>CHF: 32 |
| Janssen, 2013 (183)   | To understand the preferences for life-sustaining treatments of outpatients on dialysis and to study the quality of patient-physician communication about end-of-life care and barriers and facilitators to this communication | Hospital (outpatient); The Netherlands       | S | CKD (Dialysis)                                                                           | 80    | 62 (16)                             | 40                   |
| Janssen, 2015 (154)   | To rate the relative importance of different outcomes for haemodialysis patients and to analyse whether the relative importance differed among subgroups of patients                                                           | Hospital (outpatient); Germany               | S | CKD (Dialysis)                                                                           | 4,518 | 67 (14)                             | 42                   |
| Jorgensen, 2013 (57)  | To identify potential barriers to adjuvant chemotherapy, use in older patients by examining the associations between patient age, factors influencing chemotherapy                                                             | Hospital (outpatient); Australia             | S | Colon cancer + ≥1 chronic condition                                                      | 35    | 74 (5)                              | 47                   |



|                           |                                                                                                                                                                                                   |                                  |          |                                                                            |       |                                    |    |
|---------------------------|---------------------------------------------------------------------------------------------------------------------------------------------------------------------------------------------------|----------------------------------|----------|----------------------------------------------------------------------------|-------|------------------------------------|----|
|                           | treatment decisions, and preferences for information and decision-making involvement                                                                                                              |                                  |          |                                                                            |       |                                    |    |
| Junius-Walker, 2011 (84)  | To disclose patients' and doctors' perspectives on individual health and treatment priorities                                                                                                     | GP; Germany                      | lc (f2f) | Mean health problems (SD): 11.9 (5.4)                                      | 123   | 78 (5)                             | 67 |
| Junius-Walker, 2015 (184) | To examine older patients' perceived burden of their health problems                                                                                                                              | GP; Germany                      | S        | Median of health problems (IQR): 11 (8–15)                                 | 836   | 79 (4)                             | 61 |
| Karel, 2015 (155)         | To examine the individual variability, thematic content, and sociodemographic correlates of valued life abilities and activities among MM veterans diagnosed with life-altering cancer            | Hospital (outpatient); USA       | lc (f2f) | Head and neck, oesophageal, gastric, or colorectal cancer; CCI 6.85 (4.41) | 144   | 0–70: 51%<br>>70: 23%              | 2  |
| Kerr, 2007 (85)           | To understand how the number, type, and severity of comorbidities influence diabetes patients' self-management and treatment priorities                                                           | Community; USA                   | S        | Diabetes + comorbidities                                                   | 1,191 | <65: 30%<br>65–74: 40%<br>>74: 30% | 53 |
| Krucien, 2015 (31)*       | To identify the preferences of patients with MM for recommendations of the Chronic Care Model                                                                                                     | GP; France                       | S        | ≥ 1 chronic condition + obstructive sleep apnoea syndrome                  | 150   | 61-69: 42%<br>≥ 70: 23%            | 29 |
| Krumholz, 1998 (32)*      | To describe the resuscitation preferences of patients hospitalised with an exacerbation of severe CHF, perceptions of those preferences by their physicians, and the stability of the preferences | Hospital (inpatient); USA        | lc (f2f) | CHF (severe)                                                               | 936   | 65–74: 28%<br>> 75: 26%            | 48 |
| Lee, 2006 (185)           | To compare attitudes towards making end-of-life decisions in non-demented and mildly demented Chinese subjects                                                                                    | Nursing home; China              | S        | Dementia / no dementia + comorbidities                                     | 56    | 82 (6)                             | 95 |
| Li, 2016 (63)             | To understand treatment preferences of Parkinson patients with regard to end-of-life care                                                                                                         | Hospital (outpatient); Singapore | S        | ≥ 2 chronic conditions<br>Parkinson 54%                                    | 136   | 63                                 | 38 |
| Linsky, 2017 (41)         | To develop a survey instrument that assesses patients' experience with and attitudes toward deprescribing                                                                                         | GP; USA                          | S        | ≥ 5 medications                                                            | 790   | 66-75: 43%,<br>≥ 76: 19%           | 15 |

|                      |                                                                                                                                                                                                                                                      |                                       |          |                                                                                            |     |                                                                  |     |
|----------------------|------------------------------------------------------------------------------------------------------------------------------------------------------------------------------------------------------------------------------------------------------|---------------------------------------|----------|--------------------------------------------------------------------------------------------|-----|------------------------------------------------------------------|-----|
| Maida, 2010 (186)    | To evaluate the correlations that exist between preferences for pursuing active and aggressive medical interventions                                                                                                                                 | Hospital (outpatient); Canada         | S        | Advanced cancer                                                                            | 380 | 73; 19-99                                                        | 56  |
| McDonald, 2011 (87)  | To assess patients' and physicians' perceived importance of clinical problems and to describe the level of concordance between patients and physicians in relation to these problems                                                                 | Hospital (outpatient); Australia      | Ic (f2f) | COPD & asthma                                                                              | 52  | 70 (8); 55-87                                                    | 60  |
| Milic, 2016 (43)     | To (quantify tablet burden in women with metastatic breast cancer, establish which groups of drugs contribute most to this burden and gain insight into patients' attitudes towards oral anti-cancer treatment                                       | Hospital (inpatient & outpatient); UK | S        | Metastatic breast cancer with polypharmacy                                                 | 100 | 60; 31-95                                                        | 100 |
| Moise, 2017 (130)    | To assess whether elevated depressive symptoms are associated with decision-making preference in patients with comorbid chronic illness                                                                                                              | GP; USA                               | S        | Hypertension + depression. CCI: 3.2 (2.4)                                                  | 195 | 64 (9)                                                           | 72  |
| Morton, 2012 a (112) | To quantify pre-dialysis patients' and pre-dialysis caregivers' preferences for treatment-related attributes of kidney dialysis and the trade-offs they were willing to accept in making a choice between the different dialysis modalities          | Hospital (outpatient); Australia      | S        | CKD (end stage)                                                                            | 105 | Median: 63; 55-71                                                | 44  |
| Morton, 2012 b (111) | To determine the most important characteristics of dialysis and the trade-offs patients were willing to make in choosing dialysis instead of conservative care                                                                                       | Hospital (outpatient); Australia      | S        | CKD (end stage)                                                                            | 105 | Median: 63; 55-71                                                | 44  |
| Moss, 2001 (65)      | To examine the attitudes of dialysis patients toward CPR in the dialysis unit                                                                                                                                                                        | Hospital (outpatient); USA            | Ic (f2f) | CKD                                                                                        | 469 | 61 (16)                                                          | 54  |
| Naik, 2011 (131)     | To evaluate the effect of functional health literacy on decision-making preferences; and among those initially preferring a passive decision-making role, to explore how preferences change if their physician actively encourages their involvement | Hospital (outpatient); USA            | S        | Cardiovascular disease<br>Comorbidities: active style 5.98 (1.67); passive style 5.0 (2.1) | 100 | 71 (6) active decision-making;<br>75 (6) passive decision-making | 100 |
| Obrien, 1995 (66)    | To determine life-sustaining treatment preferences among nursing home residents, whether information                                                                                                                                                 | Nursing home; USA                     | Ic (f2f) | > 5 chronic conditions (60%)                                                               | 421 | < 70: 11%<br>70-79: 25%                                          | 80  |

|                              |                                                                                                                                                                                                                                                                                                                                                                                                                           |                                   |          |                                        |       |                           |    |
|------------------------------|---------------------------------------------------------------------------------------------------------------------------------------------------------------------------------------------------------------------------------------------------------------------------------------------------------------------------------------------------------------------------------------------------------------------------|-----------------------------------|----------|----------------------------------------|-------|---------------------------|----|
|                              | regarding CPR affected these preferences, and with whom treatment preferences had been discussed, and to identify factors associated with CPR preferences                                                                                                                                                                                                                                                                 |                                   |          |                                        |       | 80-89: 45%<br>90-103: 19% |    |
| Pandhi, 2008 (141)           | To determine if patients vary in perceptions of safety if interpersonal continuity is disrupted. If so, which characteristics are associated with feeling unsafe?                                                                                                                                                                                                                                                         | Community; USA,                   | S        | Chronic conditions + polypharmacy >80% | 6,827 | 64; 63-66                 | 54 |
| Perret-Guillaume, 2011 (132) | To investigate elderly patients' willingness to accept antihypertensive therapy and their desire for information and for participation in medical decisions                                                                                                                                                                                                                                                               | Hospital (inpatient); Switzerland | S        | Hypertension + comorbidities           | 120   | 84 (7)                    | 80 |
| Rahemi, 2018 (69)            | To investigate the influence of sociodemographic factors, acculturation, ethnicity, health status, and spirituality on older adults' health-related decisions when confronted with a choice between competing options                                                                                                                                                                                                     | Population based; USA             | S        | Seriously ill patients                 | 451   | 75 (8)                    | 32 |
| Reinke, 2011 (70)            | To assess whether a history of depression or active depressive symptoms is associated with preferences for life-sustaining therapies among veterans with COPD                                                                                                                                                                                                                                                             | Hospital (outpatient); USA        | S        | COPD & depression                      | 376   | 70 (10)                   | 3  |
| Robben, 2011 (148)           | To know what a particular patient values most and what his or her care-related goals are                                                                                                                                                                                                                                                                                                                                  | Community; The Netherlands        | Chart    | Frail                                  | 336   | 81; 61-99                 | 70 |
| Rodriguez, 2008 (187)        | To assess patients' preferred role and perceived level of involvement in medical decision making and test the effects of patients' age and role preference on perceived involvement in medical decision making                                                                                                                                                                                                            | GP & Hospital (outpatient); USA   | S (tel.) | CHF (advanced)                         | 90    | 70; 42-88                 | 6  |
| Sharma, 2016 (71)            | To determine knowledge of the CPR process, preference for CPR, and desire to participate in end-of-life decision making amongst older hospitalised patients                                                                                                                                                                                                                                                               | Hospital (inpatient); New Zealand | S        | ≥ 2 chronic conditions<br>CCI 5 (4-10) | 100   | 82; 65-98                 | 50 |
| Sudore, 2010 (188)           | To examine the prevalence of uncertainty concerning advance decisions about life sustaining treatment among chronically ill, racially=ethnically diverse older adults with varying levels of health literacy; and to assess the associations between literacy and race=ethnicity with decisional uncertainty, hypothesising that low literacy and minority status would each be independently associated with uncertainty | Hospital (outpatient); USA        | lc (f2f) | ≥ 2 chronic conditions                 | 205   | 61 (8)                    | 53 |

|                          |                                                                                                                                                                                         |                                                 |   |                                                                                                       |       |                                       |    |
|--------------------------|-----------------------------------------------------------------------------------------------------------------------------------------------------------------------------------------|-------------------------------------------------|---|-------------------------------------------------------------------------------------------------------|-------|---------------------------------------|----|
| Tamura, 2010 (189)       | To explore preferences for withdrawal and engagement in advance care planning also in terms of age, race and ethnicity                                                                  | Hospital (outpatient); USA                      | S | CKD (end stage)                                                                                       | 61    | 62 (15)                               | 26 |
| Tang, 2015 (73)          | To explore heterogeneity and changes in patterns of life sustaining treatment preferences among 2 independent cohorts of terminally ill patients with cancer recruited a decade apart   | Hospital (outpatient); Taiwan                   | S | Advanced cancer                                                                                       | 4,353 | 65-74: 50%<br>75-85: 20%<br>> 85: 13% | 44 |
| Tinetti, 2008 (156)      | To determine the priority that older adults with coexisting hypertension and fall risk give to optimising cardiovascular outcomes versus fall- and medication symptom- related outcomes | Nursing home; USA                               | S | Hypertension + fall risk (frail patients)                                                             | 123   | 82 (6)                                | 71 |
| Toto, 2015 (160)         | To evaluate the feasibility of generating patient-centred goals using goal attainment scale with older adults who have MM and were recruited through primary care                       | GP; USA                                         | S | ≥ 2 chronic conditions (Geriatric and / or Psychiatry)                                                | 27    | 77 (6)                                | 70 |
| Uhlmann, 1991 (75)       | To investigate whether perceived quality of life is associated with preferences for life-sustaining treatment in older adults                                                           | Hospital (outpatient); USA                      | S | Seriously ill patients                                                                                | 258   | 74                                    | 54 |
| Utens, 2013 (143)        | To investigate patient preference for treatment place, associated factors and patient satisfaction with a community-based hospital-at-home scheme for COPD exacerbations                | Hospital & home care organisations; Netherlands | S | COPD + acute exacerbation<br>CCI > 1: Usual hospital care 27 (39%); Early assisted discharge 32 (46%) | 139   | 68 (11)                               | 62 |
| van Summeren, 2017 (158) | To determine proposed and observed medication changes when using an outcome prioritisation tool during a medication review in general practice                                          | GP; The Netherlands                             | S | ≥ 2 chronic conditions (one cardiovascular disease) + ≥ 5 medications                                 | 59    | Median: 83; 81-86                     | 51 |
| Wieldraaijer, 2018 (144) | To assess what caregivers patients prefer to contact when faced with symptoms during survivorship care, what patient factors are associated with a preferred                            | Hospital (outpatient); Netherlands              | S | Colorectal cancer + comorbidities                                                                     | 260   | 67; 32-94                             | 46 |

|  |                                                                                     |  |  |  |  |  |  |
|--|-------------------------------------------------------------------------------------|--|--|--|--|--|--|
|  | caregiver, and whether the type of symptom is associated with a preferred caregiver |  |  |  |  |  |  |
|--|-------------------------------------------------------------------------------------|--|--|--|--|--|--|

Table 1d. Key characteristics – Quantitative longitudinal studies (observational)

| Source                     | Study methods                                                                                                                                                                                                                         |                                        |                 | Patient population                                               |                 |                         |                 |
|----------------------------|---------------------------------------------------------------------------------------------------------------------------------------------------------------------------------------------------------------------------------------|----------------------------------------|-----------------|------------------------------------------------------------------|-----------------|-------------------------|-----------------|
|                            | Study aim                                                                                                                                                                                                                             | Setting, country                       | Data collection | Def of MM                                                        | Sample (number) | Age: Mean (SD) or range | Sex (% females) |
| Brunner-LaRocca, 2012 (28) | To investigate end-of-life and CPR preferences in elderly CHF patients. In addition, predictive factors for willingness to trade survival time for better quality of life, and for wanting resuscitation if necessary, were evaluated | Hospital (outpatient); Switzerland     | S               | CHF (severe)                                                     | 622             | 77 (8)                  | 41              |
| Casarett, 2006 (77)        | To determine whether patient preferences are a barrier to hospice enrolment                                                                                                                                                           | Hospital (inpatient & outpatient); USA | lc (f2f)        | Seriously ill patients CHF, COPD, CKD or cancer                  | 203             | 73; 60-93               | 43              |
| Case, 2013 (150)           | To assess older adults' attitudes toward eliciting health outcome priorities                                                                                                                                                          | Nursing home; USA                      | S               | ≥ 4 chronic conditions (69%), ≥ 1 IADLs (26%) + depression (28%) | 356             | 76 (7)                  | 75              |
| Cosgriff, 2007 (78)        | To determine the association of preferences with end-of-life care                                                                                                                                                                     | Hospital (outpatient); USA             | lc (f2f)        | Seriously ill patients CHF, COPD, CKD or cancer                  | 118             | 73 (7)                  | 42              |
| Dunlay, 2014 (80)          | To evaluate the resuscitation preferences of patients at study enrolment, to describe changes in resuscitation preferences over time, and to assess how resuscitation preferences relate to survival                                  | Hospital (outpatient); USA             | S               | CHF (severe)                                                     | 608             | 74                      | 45              |
| Efficace, 2014 (52)        | To assess preferences for involvement in treatment decisions and requests for prognostic information in newly diagnosed higher-risk MDS patients                                                                                      | Hospital (outpatient); Italy           | S               | MDS with IPSS risk score of intermediate or high risk            | 280             | 70; 32-89               | 37              |

|                      |                                                                                                                                                                                                                                                     |                                        |          |                                                    |       |                  |    |
|----------------------|-----------------------------------------------------------------------------------------------------------------------------------------------------------------------------------------------------------------------------------------------------|----------------------------------------|----------|----------------------------------------------------|-------|------------------|----|
| Fried, 2006 (162)    | To examine changes over time in end-of-life treatment preferences, measured in terms of willingness to undergo treatment based on the health state that would result from the treatment, in a cohort of older persons with advanced chronic illness | Hospital (inpatient & outpatient); USA | Ic (f2f) | Seriously ill patients<br>CHF, COPD, CKD or cancer | 226   | 73 (7)           | 53 |
| Fried, 2007 a (59)   | To determine whether preferences for future life-sustaining treatments change over time in a consistent and predictable manner                                                                                                                      | Community; USA                         | Ic (f2f) | Seriously ill patients<br>CHF, COPD, CKD or cancer | 189   | 73 (7)           | 45 |
| Fried, 2007 b (58)   | To examine changes in treatment preferences over time                                                                                                                                                                                               | GP; USA                                | S        | Seriously ill patients<br>CHF, COPD, CKD or cancer | 226   | 73 (7)           | 43 |
| Hamel, 1999 (60)     | To determine the effect of age on decisions to withhold life-sustaining therapies                                                                                                                                                                   | Hospital (inpatient); USA              | Ic (f2f) | Seriously ill patients                             | 9,105 | Median: 63       | 44 |
| Hamel, 2000 (36)*,** | To review previously published findings about how patient age influenced patterns of care for seriously ill patients                                                                                                                                | Hospital (inpatient); USA              | Ic (f2f) | Seriously ill patients                             | 9,105 | [older patients] | nr |
| Janssen, 2012 (61)   | To investigate 1-year stability of preferences regarding CPR and mechanical ventilation in outpatients with advanced COPD, CHF, or CKD and to identify predictors of changes in preferences                                                         | Hospital (outpatient); The Netherlands | Ic (f2f) | Advanced COPD, CHF or CKD                          | 265   | 67 (13)          | 36 |
| Lynn, 2000 (64)      | To characterise COPD over patients' last 6 months of life                                                                                                                                                                                           | Hospital (inpatient); USA              | Ic (f2f) | COPD + ≥ 3 comorbidities                           | 416   | 72               | 75 |
| Ostermann, 2003 (67) | To ascertain the initial views of a haemodialysis cohort in the UK in terms of their CPR status in the event of an in-hospital cardiac arrest unrelated to dialysis                                                                                 | Hospital (outpatient); UK              | Ic (f2f) | CKD (Haemodialysis)                                | 11    | 74 (10); 46-81   | 50 |
| Parr, 2010 (68)      | To understand age differences in advanced cancer patients' end-of-life experiences                                                                                                                                                                  | Hospital (inpatient); USA              | Ic (f2f) | Advanced cancer<br>CCI: 10.0 (2.7)                 | 126   | 72 (6)           | 50 |

|                     |                                                                                                                                                                                                                                                           |                              |          |                                                                                |       |                           |     |
|---------------------|-----------------------------------------------------------------------------------------------------------------------------------------------------------------------------------------------------------------------------------------------------------|------------------------------|----------|--------------------------------------------------------------------------------|-------|---------------------------|-----|
| Rothman, 2007 (107) | To assess the frequency of, reasons for, factors associated with, and outcomes of treatment refusal among older persons with advanced chronic disease                                                                                                     | Hospital (outpatient); UK    | Ic (f2f) | Advanced cancer, CHF or COPD                                                   | 226   | 74 (7)                    | 43  |
| Suggs, 2017 (118)   | To analyse factors associated with selection of the following treatment modalities (breast conservation surgery, mastectomy, and contralateral prophylactic mastectomy) in a rural West Virginia tertiary care hospital                                   | Hospital (outpatient); USA   | Chart    | Breast Cancer (early stage)<br>CCI mean (SD):<br>BCS 2.2 (0.5); M<br>2.4 (0.7) | 226   | 74 (7)                    | 43  |
| Tang, 2016 (33)*    | To explore longitudinal changes in life sustaining treatment preferences and their associations with accurate prognostic awareness, physician-patient end-of-life care discussions, and depressive symptoms in terminally ill cancer patients' final year | Hospital (inpatient); Taiwan | Ic (f2f) | Advanced cancer                                                                | 302   | >65: 32%                  | 43  |
| Teno, 2000 (74)     | To evaluate decision-making and outcomes in seriously ill patients with an intensive care unit stay of at least 14 days                                                                                                                                   | Community; USA               | Ic (f2f) | Seriously ill patients                                                         | 1,264 | BCS:62 (12)<br>M: 61 (13) | 100 |
| Weeks, 1998 (76)    | To test the hypothesis that among terminally ill cancer patients an accurate understanding of prognosis is associated with a preference for therapy that focuses on comfort over attempts at life extension                                               | Hospital (inpatient); USA    | Ic (f2f) | Advanced cancer                                                                | 917   | 62                        | 38  |
| Wright, 2010 (34)*  | To examine whether patients' desire for life extending therapy was associated with their end-of-life care                                                                                                                                                 | Hospital (outpatient); USA   | S        | Advanced cancer                                                                | 301   | 60-69: 28%<br>> 70: 21%   | 47  |
| Zafar, 2013 (35)*   | To determine how patient's preferences guide the course of palliative chemotherapy for advanced colorectal cancer                                                                                                                                         | Hospital (outpatient); USA   | S        | Metastatic colorectal cancer                                                   | 702   | 65-74: 25%<br>75: 27%     | 38  |
| Zulman, 2010 (90)   | To understand patterns of patient-provider concordance in the prioritisation of health conditions in patients with MM                                                                                                                                     | GP; USA                      | S        | Diabetes + hypertension + comorbidities                                        | 1,169 | 65 (11)                   | nr  |

Table 1e. Key characteristics – Quantitative study (interventional)

| Source | Patient population |
|--------|--------------------|
|--------|--------------------|

|                          | Study aim                                                                                                                                           | Setting, country | Intervention                             | Randomisation                | Data collection | Def of MM                  | Sample (number)         | Age: Mean (SD) or range | Sex (% females) |
|--------------------------|-----------------------------------------------------------------------------------------------------------------------------------------------------|------------------|------------------------------------------|------------------------------|-----------------|----------------------------|-------------------------|-------------------------|-----------------|
| Junius-Walker, 2012 (83) | To investigate whether a structured priority-setting consultation reconciles the often-differing doctor-patient views on the importance of problems | GP; Germany      | Structured priority-setting consultation | CRT (randomisation unit=GPs) | S               | Mean health problems: 11.4 | 317*** (IG=174; CG=143) | 78                      | 67              |

**Table 1f. Key characteristics – Mixed-methods studies**

| Source                   | Study aim                                                                                                                                                                                                                                | Setting, country              | Data collection | Patient population                                                    |                 |                                     |                 |
|--------------------------|------------------------------------------------------------------------------------------------------------------------------------------------------------------------------------------------------------------------------------------|-------------------------------|-----------------|-----------------------------------------------------------------------|-----------------|-------------------------------------|-----------------|
|                          |                                                                                                                                                                                                                                          |                               |                 | Def of MM                                                             | Sample (number) | Age: Mean (SD) or range             | Sex (% females) |
| Adams, 2013 (190)        | To investigate the ease with which patients of differing functional ability use three types of multi-compartment medication device and whether some types are easier to use than others                                                  | Hospital (inpatient); USA     | S & I (f2f)     | 1 - 15 medications (median 5)                                         | 50              | Median: 85; 77-98                   | 76              |
| Puts, 2017 (121)         | To better understand the treatment decision process from all perspectives                                                                                                                                                                | Hospital (outpatient); Canada | S & I (f2f)     | Advanced cancer                                                       | 32              | 63–69: 9%<br>70–79: 56%<br>80+: 34% | 31              |
| van Summeren, 2016 (157) | To explore an outcome prioritisation tool in eliciting individuals' preferred health outcomes (remaining alive, maintaining independence, reducing pain, reducing other symptoms) in the context of medication review in family practice | GP; The Netherlands           | S & I (f2f)     | ≥ 2 chronic conditions (one cardiovascular disease) + ≥ 5 medications | 60              | 84 (4)                              | 52              |

CCI=Charlson Comorbidity Index; CHF=Chronic Heart Failure; CKD=Chronic Kidney Disease; CMI=Chronic Medically Ill; COPD=Chronic Obstructive Pulmonary Disease; CPR=CardioPulmonary Resuscitation; CRT=Cluster Randomised Controlled Trial; f2f=face-to-face; FG=Focus Groups; GPs=General Practice; IADL=Instrumental Activity of Daily Living; ICD=Implantable Cardioverter Defibrillator; I=open-ended questions interview; Ic=closed-ended questions



1  
2  
3  
4  
5  
6  
7  
8  
9  
10  
11  
12  
13  
14  
15  
16  
17  
18  
19  
20  
21  
22  
23  
24  
25  
26  
27  
28  
29  
30  
31  
32  
33  
34  
35  
36  
37  
38  
39  
40  
41  
42  
43  
44  
45  
46

interview; IPSS=International Prognostic Scoring System; IQR=Interquartile Range; MDS=Myelodysplastic Syndromes; MM=Multimorbidity; n=number; nr=not reported; OARS=Older Americans Resources and Services; S=Survey; SD=Standard Deviation; SPMI=Severe and Persistent Mental Illness; ssl=semi-structured interviews; ssl (tel.) = semi-structured interviews (telephone); UK=United Kingdom; USA=United States of America; 2a=Secondary analysis.

\* The study included a larger sample based on different (younger) age groups. In the present evidence map, only data from patients of 60 years of age or older were considered. Studies are included if preferences of older patients are addressed separately in the study, even when they included younger populations.

\*\*The study did not report descriptives of age but mentions the included population are "older patients".

\*\*\*Number of patients analysed.

For peer review only

**Table 2. Descriptive summary of included studies**

| Variable                                     | Total – n (%)  |
|----------------------------------------------|----------------|
| <i>Study characteristics</i>                 |                |
| Geographical location                        |                |
| North America                                | 94 (62 %)      |
| Europe                                       | 43 (28 %)      |
| Australia & New Zealand                      | 10 (7 %)       |
| Asia                                         | 5 (3 %)        |
| Setting                                      |                |
| Primary care                                 | 54 (36 %)      |
| Outpatient specialised                       | 59 (39 %)      |
| Hospital (inpatient & emergency)             | 26 (17 %)      |
| Nursing homes                                | 5 (3 %)        |
| Interdisciplinary                            | 8 (5 %)        |
| Study design/method                          |                |
| Qualitative (observational)                  | 63 (42 %)      |
| Cross-sectional (observational)              | 59 (39 %)      |
| Longitudinal (observational)                 | 4 (6 %)        |
| Quantitative                                 | 86 (57 %)      |
| Cross-sectional (observational)              | 63 (41 %)      |
| Longitudinal (observational)                 | 22 (15 %)      |
| Interventional                               | 1 (1%)         |
| Mixed methods (qualitative and quantitative) | 3 (2 %)        |
| Observational (total)                        | 151 (99 %)     |
| Interventional (total)                       | 1 (1%)         |
| Sample size – median (range)                 |                |
| Observational                                |                |
| Qualitative                                  | 30 (9-160)     |
| Quantitative                                 | 196 (11-9,105) |
| Mixed methods                                | 50 (32-60)     |
| Interventional                               | 317            |
| <i>Patients' characteristics</i>             |                |
| Type of condition                            |                |
| Multimorbidity                               | 58 (38 %)      |
| Comorbidity                                  | 29 (19 %)      |
| Heart failure                                | 10 (7 %)       |
| Advanced cancer                              | 16 (11 %)      |
| Chronic kidney disease                       | 15 (10 %)      |
| COPD                                         | 4 (3 %)        |
| Mixed (heart failure, COPD...)               | 20 (13 %)      |
| Age (range)*                                 | 60-85          |
| Sex (% female)*                              | 28,905 (51 %)  |

1  
2  
3  
4  
5  
6  
7  
8  
9  
10  
11  
12  
13  
14  
15  
16  
17  
18  
19  
20  
21  
22  
23  
24  
25  
26  
27  
28  
29  
30  
31  
32  
33  
34  
35  
36  
37  
38  
39  
40  
41  
42  
43  
44  
45  
46  
47  
48  
49  
50  
51  
52  
53  
54  
55  
56  
57  
58  
59  
60

\*Studies with overlapping population were excluded (n=10)

(36,59,81,94,98,107,111,158,162,180)

For peer review only

**Table 3. Description of the type of preferences investigated in the included studies.**

| Types of preferences         | Definition                                                                                                                                                                                                                                                                                                                                                                       | Themes                                  | No. of Studies | References                                                                                     |
|------------------------------|----------------------------------------------------------------------------------------------------------------------------------------------------------------------------------------------------------------------------------------------------------------------------------------------------------------------------------------------------------------------------------|-----------------------------------------|----------------|------------------------------------------------------------------------------------------------|
| End-of-life Care Preferences | Treatment preferences for resuscitation and critical care. Covers all aspects relating to anticipatory decision-making such as advance directives                                                                                                                                                                                                                                | Advanced Care Planning                  | 51             | (28,32–34,36,39,46,50–52,56,58–81,151,162,170–172,174,176,177,179,180,182,183,185,186,188,189) |
|                              |                                                                                                                                                                                                                                                                                                                                                                                  | - Life-Sustaining Treatment Preferences | 29             | (28,32–34,36,58–81)                                                                            |
| Self-management Preferences* | Preferences related to the ongoing activities that an individual undertakes to maintain or reduce the effect of a disease/s on his or her health status.<br>It includes how and under what circumstances, patients prioritise conditions and adjust self-management practices, how priorities might change over time, and how these are discussed with healthcare professionals. | eHealth Support                         | 2              | (88,105)                                                                                       |
|                              |                                                                                                                                                                                                                                                                                                                                                                                  | Prioritisation of Health Problems       | 20             | (45,47,54,83–99)                                                                               |
|                              |                                                                                                                                                                                                                                                                                                                                                                                  | Medication Self-management              | 8              | (42,43,47,54,100–103)                                                                          |
|                              |                                                                                                                                                                                                                                                                                                                                                                                  | Self-Care Behaviours                    | 3              | (44,55,104)                                                                                    |
|                              |                                                                                                                                                                                                                                                                                                                                                                                  | Revisiting Choices                      | 2              | (29,88)                                                                                        |
| Treatment Preferences        | Preferences that involve a discrete set of effective treatment options (e.g., radical mastectomy vs lumpectomy with radiation for localised breast cancer). The treatment options can include any intervention with a therapeutic aim.                                                                                                                                           | Medication                              | 13             | (37,41–43,47,49,53,54,106–109)                                                                 |
|                              |                                                                                                                                                                                                                                                                                                                                                                                  | Dialysis                                | 6              | (48,110–114)                                                                                   |
|                              |                                                                                                                                                                                                                                                                                                                                                                                  | Surgery                                 | 4              | (115–118)                                                                                      |
|                              |                                                                                                                                                                                                                                                                                                                                                                                  | Chemotherapy                            | 5              | (35,57,119–121)                                                                                |
|                              |                                                                                                                                                                                                                                                                                                                                                                                  | Non-pharmacological / conservative      | 3              | (122–124)                                                                                      |
|                              | Medication Device                                                                                                                                                                                                                                                                                                                                                                | 1                                       | (190)          |                                                                                                |
| Involvement in the Shared    | Preferences regarding the degree of involvement in discussions with health professionals about                                                                                                                                                                                                                                                                                   | Patterns of engagement                  | 21             | (37,41,46,48–52,57,125–134)                                                                    |

1  
2  
3  
4  
5  
6  
7  
8  
9  
10  
11  
12  
13  
14  
15  
16  
17  
18  
19  
20  
21  
22  
23  
24  
25  
26  
27  
28  
29  
30  
31  
32  
33  
34  
35  
36  
37  
38  
39  
40  
41  
42  
43  
44  
45  
46

|                                              |                                                                                                                                                                                                                                                                    |                                |    |                      |
|----------------------------------------------|--------------------------------------------------------------------------------------------------------------------------------------------------------------------------------------------------------------------------------------------------------------------|--------------------------------|----|----------------------|
| Decision Making Process Preferences*         | the options for treatment, the benefits and harms of each therapy, and making collaborative decisions about how to proceed.                                                                                                                                        | Patient Decision Aid           | 1  | (56)                 |
|                                              |                                                                                                                                                                                                                                                                    | Information                    | 4  | (39,52,129,135)      |
|                                              |                                                                                                                                                                                                                                                                    | Communication with Providers   | 1  | (40)                 |
| Healthcare Service Preferences               | Preferences related to the quality of care and the planning and delivery of the services the health system provides.                                                                                                                                               | Processes of care              | 10 | (45,136–144)         |
|                                              |                                                                                                                                                                                                                                                                    | - Site of care                 | 2  | (139,143)            |
|                                              |                                                                                                                                                                                                                                                                    | - Type of social support       | 1  | (140)                |
|                                              |                                                                                                                                                                                                                                                                    | - Type of caregiver / provider | 3  | (136,139,144)        |
|                                              |                                                                                                                                                                                                                                                                    | - Type of caregiver / provider | 5  | (45,136–138)         |
|                                              |                                                                                                                                                                                                                                                                    | - Continuity and Access        | 1  | (142)                |
|                                              |                                                                                                                                                                                                                                                                    | - Guiding principles           |    |                      |
|                                              |                                                                                                                                                                                                                                                                    | Service models                 | 2  | (31,145)             |
|                                              |                                                                                                                                                                                                                                                                    | - Chronic Care Model           | 1  | (31)                 |
| - Cardiac Rehabilitation                     | 1                                                                                                                                                                                                                                                                  | (145)                          |    |                      |
| Health Outcome Prioritisation & Goal Setting | Preferences regarding personal health and life outcomes (e.g., function, social activities, and symptom relief) that people hope to achieve through their health care. Health outcome goals that patients prioritise within the context of their care preferences. | Life & Health Goals            | 6  | (44,55,146–149)      |
|                                              |                                                                                                                                                                                                                                                                    | Health Outcome Prioritisation  | 10 | (53,150,151,154–158) |
|                                              |                                                                                                                                                                                                                                                                    | - Preferred tools              | 1  | (150)                |
|                                              |                                                                                                                                                                                                                                                                    | Collaborative Goal Setting     | 3  | (104,159,160)        |
| - Patient, physician, caregiver agreement    | 1                                                                                                                                                                                                                                                                  | (159)                          |    |                      |
| Screening & Diagnostic Tests                 | Preferences that involve the decision whether or not to undergo a screening or diagnostic test.                                                                                                                                                                    | Screening Test                 | 1  | (161)                |
|                                              |                                                                                                                                                                                                                                                                    | - Cancer Screening             | 1  | (161)                |

1  
2  
3  
4  
5  
6  
7  
8  
9  
10  
11  
12  
13  
14  
15  
16  
17  
18  
19  
20  
21  
22  
23  
24  
25  
26  
27  
28  
29  
30  
31  
32  
33  
34  
35  
36  
37  
38  
39  
40  
41  
42  
43  
44  
45  
46

|             |  |  |  |  |
|-------------|--|--|--|--|
| Preferences |  |  |  |  |
|-------------|--|--|--|--|

\*Three studies are listed twice as they were assigned two different codes

For peer review only

Figure 1. Evidence map PRISMA flowchart (21)

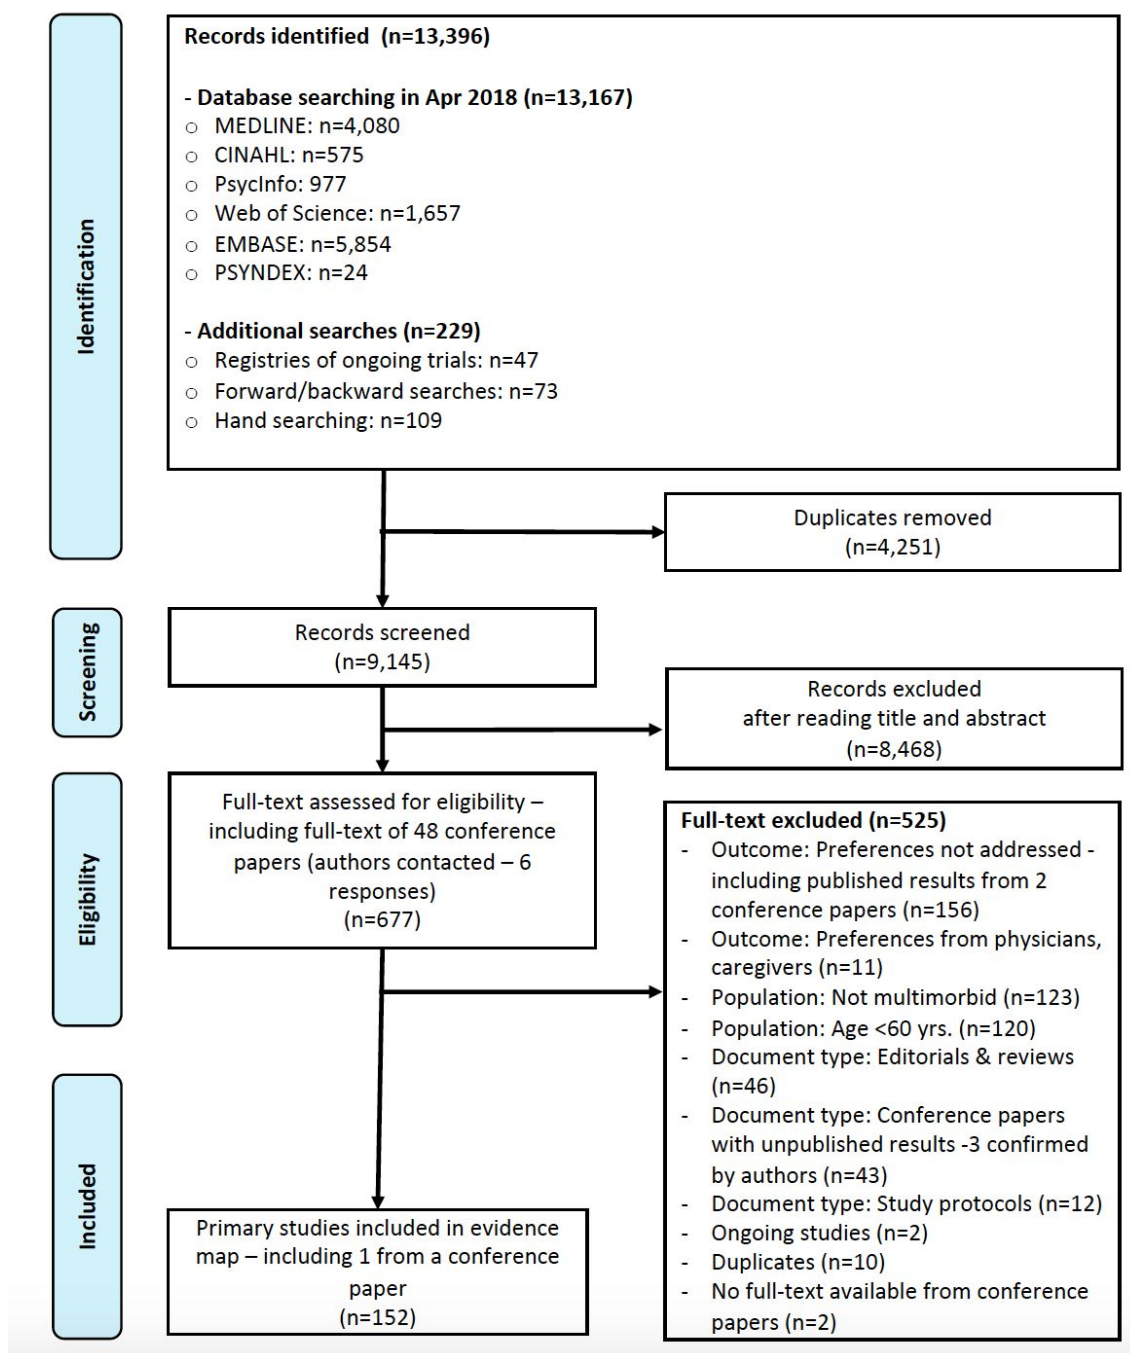

**Figure 2. Types of preferences investigated in the included studies by setting and study design\***

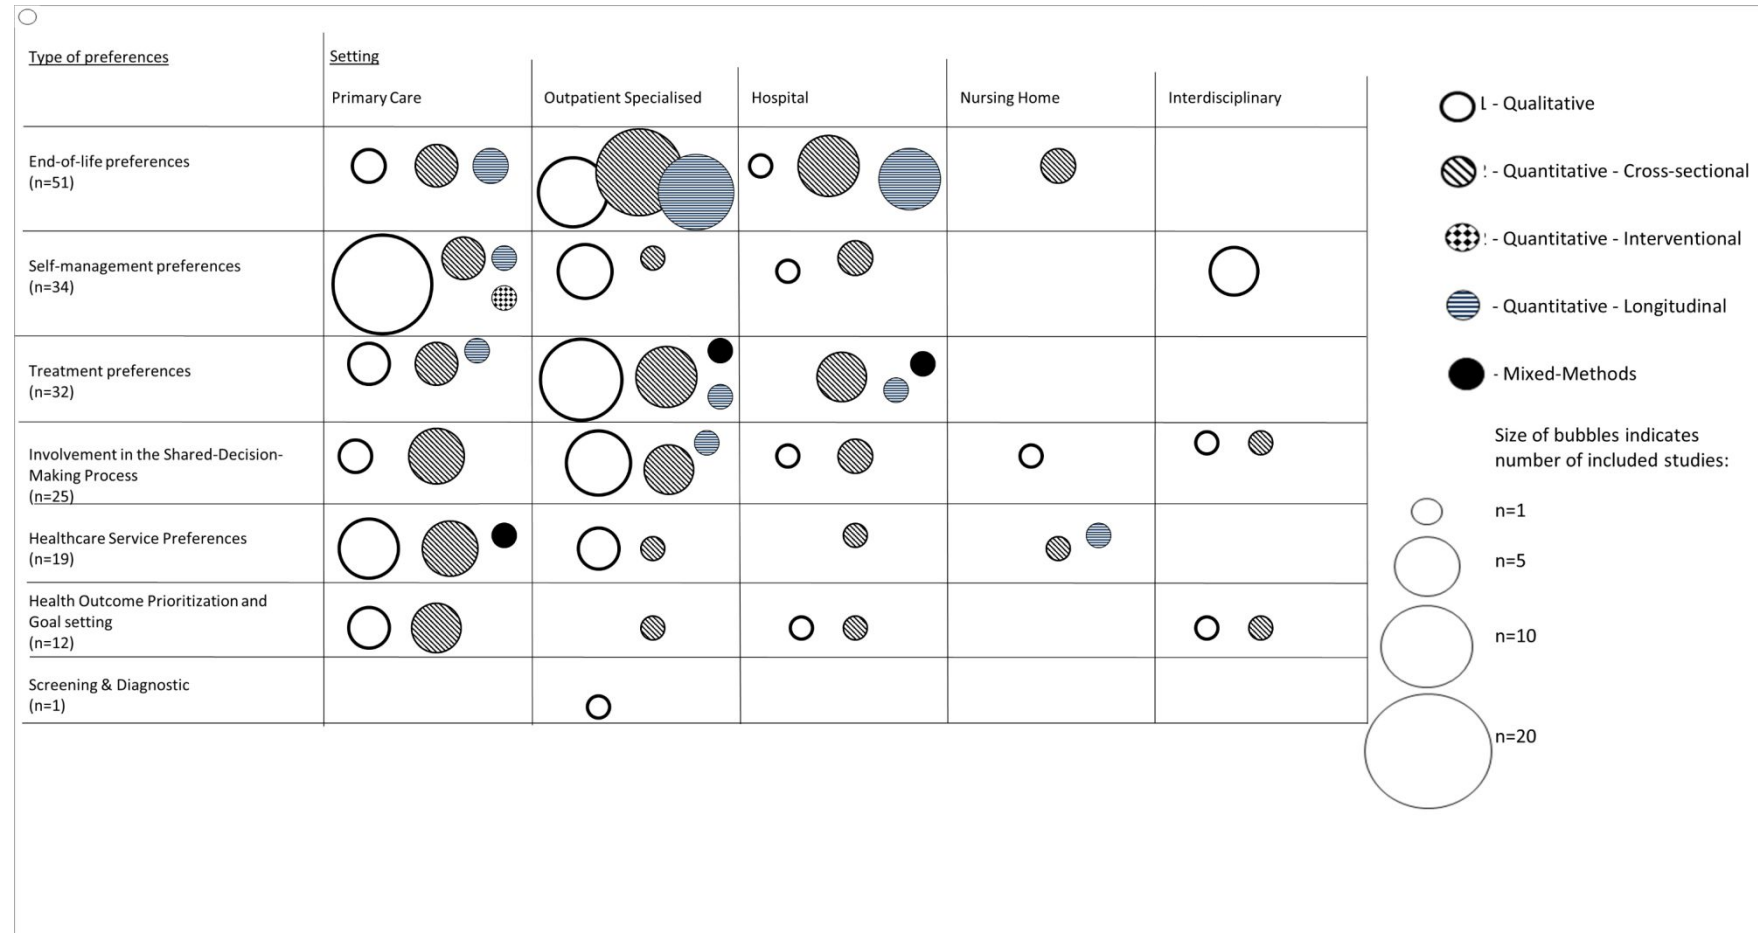

Size of the circles represent number of studies; pattern coding represents study design. \*The bubble plot depicts more than the total number of included studies (n=174 vs. n=152) because 22 studies were assigned to two different types of preferences.



**Supplementary figure 1. Number of studies published per year.**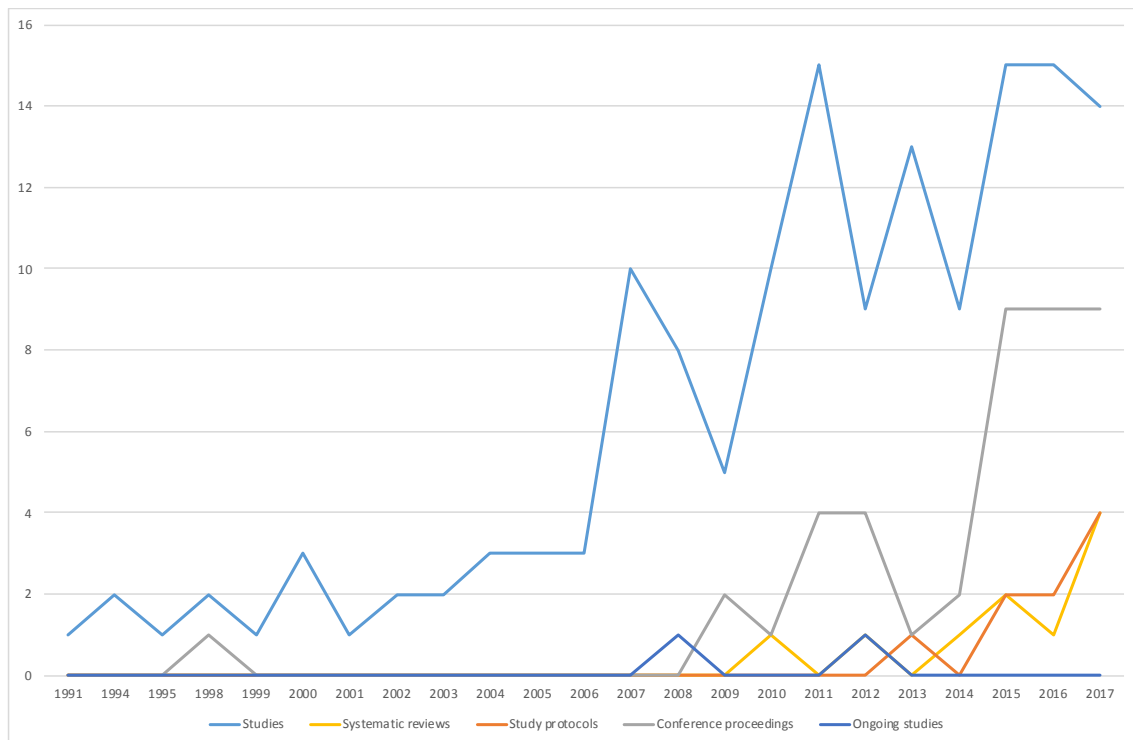

1 **Supplementary table 2. Search strategy used for MEDLINE database (search interface: Ovid;**

2 **Host: Wolters Kluwer)**

3 **MEDLINE 1946 to the third week of April, 2018,**

4 **MEDLINE Daily Update April 26, 2018,**

5 **MEDLINE In-Process & Other Non-Indexed Citations April 26, 2018,**

6 **MEDLINE Epub Ahead of Print April 26, 2018**

7 **Search date (yyyy-mm-dd): 2018-04-27**

| # | Searches                                                                                                                 | Results | Annotations |
|---|--------------------------------------------------------------------------------------------------------------------------|---------|-------------|
| 1 | exp aged/                                                                                                                | 2800655 | #1 to #8:   |
| 2 | Geriatrics/                                                                                                              | 28648   | Aspect Aged |
| 3 | (old*3 adj2 (adult*2 or people or person* or patient* or age*2 or man or men or wom#n or client* or residen*)).ti,ab,kf. | 551680  |             |
| 4 | (elder* or geriat* or geronto* or frail* or senior? or agedly).ti,ab,kf.                                                 | 314577  |             |
| 5 | (high*3 age*2 or late* life* or late* live*).ti,ab,kf.                                                                   | 21918   |             |

|    |    |                                                                                                                                            |         |
|----|----|--------------------------------------------------------------------------------------------------------------------------------------------|---------|
| 1  |    |                                                                                                                                            |         |
| 2  |    |                                                                                                                                            |         |
| 3  |    |                                                                                                                                            |         |
| 4  |    |                                                                                                                                            |         |
| 5  |    |                                                                                                                                            |         |
| 6  |    |                                                                                                                                            |         |
| 7  | 6  | ((liv* or life*) adj2 long*3 adj2 (adult* or people or<br>person* or patient* or man or men or wom?n or client*<br>or residen*)).ti,ab,kf. | 2540    |
| 8  |    |                                                                                                                                            |         |
| 9  |    |                                                                                                                                            |         |
| 10 |    |                                                                                                                                            |         |
| 11 |    |                                                                                                                                            |         |
| 12 |    |                                                                                                                                            |         |
| 13 | 7  | advanced in years.ti,ab,kf. or betagt*.ot.                                                                                                 | 162     |
| 14 |    |                                                                                                                                            |         |
| 15 |    |                                                                                                                                            |         |
| 16 | 8  | or/1-7                                                                                                                                     | 3248520 |
| 17 |    |                                                                                                                                            |         |
| 18 |    |                                                                                                                                            |         |
| 19 |    |                                                                                                                                            |         |
| 20 | 9  | comorbidity/                                                                                                                               | 92917   |
| 21 |    |                                                                                                                                            |         |
| 22 |    |                                                                                                                                            |         |
| 23 | 10 | Multiple Chronic Conditions/                                                                                                               | 178     |
| 24 |    |                                                                                                                                            |         |
| 25 |    |                                                                                                                                            |         |
| 26 |    |                                                                                                                                            |         |
| 27 | 11 | exp chronic disease/ and (multi or multiple or<br>concurren* or complex*).ti,ab,kf.                                                        | 20443   |
| 28 |    |                                                                                                                                            |         |
| 29 |    |                                                                                                                                            |         |
| 30 |    |                                                                                                                                            |         |
| 31 |    |                                                                                                                                            |         |
| 32 |    |                                                                                                                                            |         |
| 33 | 12 | (comorbid* or co-morbid*).ti,ab,kf,ot. or (komorbid* or<br>ko-morbid*).ot.                                                                 | 140228  |
| 34 |    |                                                                                                                                            |         |
| 35 |    |                                                                                                                                            |         |
| 36 |    |                                                                                                                                            |         |
| 37 |    |                                                                                                                                            |         |
| 38 |    |                                                                                                                                            |         |
| 39 |    |                                                                                                                                            |         |
| 40 | 13 | (multimorbid* or multi*-morbid*).ti,ab,kf,ot.                                                                                              | 4057    |
| 41 |    |                                                                                                                                            |         |
| 42 |    |                                                                                                                                            |         |
| 43 | 14 | (polymorbid* or poly morbid*).ti,ab,kf,ot.                                                                                                 | 292     |
| 44 |    |                                                                                                                                            |         |
| 45 |    |                                                                                                                                            |         |
| 46 | 15 | multidisease*.ti,ab,kf.                                                                                                                    | 39      |
| 47 |    |                                                                                                                                            |         |
| 48 |    |                                                                                                                                            |         |
| 49 |    |                                                                                                                                            |         |
| 50 | 16 | ((multi or multiple) adj2 (ill or illness* or condition* or<br>disorder* or syndrom* or disease*)).ti,ab,kf.                               | 30204   |
| 51 |    |                                                                                                                                            |         |
| 52 |    |                                                                                                                                            |         |
| 53 |    |                                                                                                                                            |         |
| 54 |    |                                                                                                                                            |         |
| 55 |    |                                                                                                                                            |         |
| 56 |    |                                                                                                                                            |         |
| 57 |    |                                                                                                                                            |         |
| 58 |    |                                                                                                                                            |         |
| 59 |    |                                                                                                                                            |         |
| 60 |    |                                                                                                                                            |         |

|    |                                                                                                                              |        |                          |
|----|------------------------------------------------------------------------------------------------------------------------------|--------|--------------------------|
| 17 | (complex* adj2 (patient* or disease* or ill or illness* or condition* or disorder*)).ti,ab,kf.                               | 42426  |                          |
| 18 | (concurrent* adj2 (disease* or ill or illness* or condition* or disorder*)).ti,ab,kf.                                        | 4305   |                          |
| 19 | (multimedication* or multi*-medication* or polymedication* or poly-medication* or polypharmacy* or poly-pharmacy*).ti,ab,kf. | 8133   |                          |
| 20 | Polypharmacy/                                                                                                                | 3790   |                          |
| 21 | or/9-20                                                                                                                      | 297020 |                          |
| 22 | 8 and 21                                                                                                                     | 110795 | Aged AND Multi-morbidity |
| 23 | exp patient centered care/                                                                                                   | 16400  | #23 to #49:              |
| 24 | exp patient satisfaction/                                                                                                    | 78556  | Aspect patient-          |
| 25 | decision making/                                                                                                             | 83248  | centered care            |
| 26 | choice behaviour/                                                                                                            | 28960  |                          |
| 27 | Health Priorities/                                                                                                           | 10119  |                          |
| 28 | ((patient? or client? or person*2) adj2 prefer*).ti,ab,kf.                                                                   | 18606  |                          |

|    |                                                                                        |       |
|----|----------------------------------------------------------------------------------------|-------|
| 29 | ((patient? or client? or person*2) adj2 priorit*).ti,ab,kf.                            | 2490  |
| 30 | (treatment adj2 (goal? or preference? or priorit*).ti,ab,kf.                           | 11750 |
| 31 | goal attainment.ti,ab,kf.                                                              | 1550  |
| 32 | (goal oriented* or goaloriented*).ti,ab,kf.                                            | 1425  |
| 33 | goals/                                                                                 | 14804 |
| 34 | (patient cent* adj2 (care or approach* or therap* or treatment or medic*).ti,ab,kf.    | 9128  |
| 35 | (person cent* adj2 (care or approach* or therap* or treatment or medic*).ti,ab,kf.     | 2349  |
| 36 | (client cent* adj2 (care or approach* or therap* or treatment or medic*).ti,ab,kf.     | 556   |
| 37 | (patient oriented adj2 (care or approach* or therap* or treatment or medic*).ti,ab,kf. | 375   |
| 38 | (person oriented adj2 (care or approach* or therap* or treatment or medic*).ti,ab,kf.  | 114   |

|    |                                                                                                                                 |       |
|----|---------------------------------------------------------------------------------------------------------------------------------|-------|
| 39 | (client oriented adj2 (care or approach* or therap* or treatment or medic*)).ti,ab,kf.                                          | 19    |
| 40 | (patient cent?redness or client cent?redness or person cent?redness).ti,ab,kf.                                                  | 1408  |
| 41 | (patientcent* or clientcent* or personcent*).ti,ab,kf.                                                                          | 24    |
| 42 | (patientoriented* or clientoriented* or personoriented*).ti,ab,kf.                                                              | 4     |
| 43 | (patient*orientier* or klient*orientier* or patient*zentrier* or klient*zentrier* or person*orientier* or person*zentrier*).ot. | 179   |
| 44 | ((patient* or klient* or person*) adj (zentrier* or orientier*)).ot.                                                            | 24    |
| 45 | ((goal* or priorit* or target* or value* or preference*) adj2 (patient* or individual* or person* or client*)).ti,ab,kf.        | 63093 |
| 46 | ((goal* or priorit* or target* or preference*) adj2 treatment*).ti,ab,kf.                                                       | 32182 |
| 47 | ((patient* or client* or person*) adj2 choice*).ti,ab,kf.                                                                       | 9970  |

|    |    |                                  |         |
|----|----|----------------------------------|---------|
| 1  |    |                                  |         |
| 2  |    |                                  |         |
| 3  |    |                                  |         |
| 4  | 48 | shared decision making.ti,ab,kf. | 5495    |
| 5  |    |                                  |         |
| 6  |    |                                  |         |
| 7  | 49 | or/23-48                         | 326625  |
| 8  |    |                                  |         |
| 9  |    |                                  |         |
| 10 |    |                                  |         |
| 11 |    |                                  |         |
| 12 |    |                                  |         |
| 13 | 50 | 22 and 49                        | 4208    |
| 14 |    |                                  |         |
| 15 |    |                                  |         |
| 16 |    |                                  |         |
| 17 |    |                                  |         |
| 18 |    |                                  |         |
| 19 |    |                                  |         |
| 20 |    |                                  |         |
| 21 | 51 | protocol.ti.                     | 35122   |
| 22 |    |                                  |         |
| 23 |    |                                  |         |
| 24 |    |                                  |         |
| 25 |    |                                  |         |
| 26 |    |                                  |         |
| 27 |    |                                  |         |
| 28 |    |                                  |         |
| 29 |    |                                  |         |
| 30 | 52 | 21 and 49 and 51                 | 89      |
| 31 |    |                                  |         |
| 32 |    |                                  |         |
| 33 |    |                                  |         |
| 34 |    |                                  |         |
| 35 |    |                                  |         |
| 36 |    |                                  |         |
| 37 |    |                                  |         |
| 38 |    |                                  |         |
| 39 |    |                                  |         |
| 40 |    |                                  |         |
| 41 |    |                                  |         |
| 42 |    |                                  |         |
| 43 |    |                                  |         |
| 44 |    |                                  |         |
| 45 |    |                                  |         |
| 46 | 53 | 50 or 52                         | 4259    |
| 47 |    |                                  |         |
| 48 |    |                                  |         |
| 49 |    |                                  |         |
| 50 |    |                                  |         |
| 51 |    |                                  |         |
| 52 |    |                                  |         |
| 53 |    |                                  |         |
| 54 |    |                                  |         |
| 55 |    |                                  |         |
| 56 |    |                                  |         |
| 57 |    |                                  |         |
| 58 |    |                                  |         |
| 59 | 54 | exp animals/ not humans/         | 4450254 |
| 60 |    |                                  |         |

|    |                           |         |                                                        |
|----|---------------------------|---------|--------------------------------------------------------|
| 55 | 53 not 54                 | 4258    |                                                        |
| 56 | case reports.pt.          | 1875801 | Exclusion of editorials                                |
| 57 | (case? adj3 report).ti.   | 302363  | and case reports                                       |
| 58 | editorial.pt.             | 456208  |                                                        |
| 59 | editorial.ti.             | 34313   |                                                        |
| 60 | or/56-59                  | 2443711 |                                                        |
| 61 | 55 not 60                 | 4111    |                                                        |
| 62 | remove duplicates from 61 | 4080    | Exclusion of<br>duplicates.<br><br><b>Final result</b> |

8

9 / = Medical Subject Heading (MeSH)

10 Exp = exploded Mesh term

11 \* = truncation, any number of characters

12 \*2, \*3 = truncation: from 0 to 2, 0 to 3 characters

13 ? = 0 or 1 character

14 # = 1 character

15 .ti,ab,kf. = title, abstract, keyword heading word



1  
2  
3  
4  
5  
6  
7  
8  
9  
10  
11  
12  
13  
14  
15  
16  
17  
18  
19  
20  
21  
22  
23  
24  
25  
26  
27  
28  
29  
30  
31  
32  
33  
34  
35  
36  
37  
38  
39  
40  
41  
42  
43  
44  
45  
46  
47  
48  
49  
50  
51  
52  
53  
54  
55  
56  
57  
58  
59  
60

16 .ti. = title

17 .ot. = original title

18 .mp. = title, abstract, original title, name of substance word, subject heading word, keyword

19 heading word, protocol supplementary concept word, rare disease supplementary concept

20 word, unique identifier

21 .pt. = publication type

22  $adj_n$  = Search terms within  $n$  words in any order

23

24

25

26

For peer review only

| Source                                                                                                                                                                                                                                                                                               | Reason for exclusion                  |
|------------------------------------------------------------------------------------------------------------------------------------------------------------------------------------------------------------------------------------------------------------------------------------------------------|---------------------------------------|
| — — —. 2014. 'Abstracts of Papers Presented at the Health Services Research and Pharmacy Practice Conference, HSRPP 2014', International Journal of Pharmacy Practice. Conference: Health Services Research and Pharmacy Practice Conference, HSRPP, 22.                                             | Document type: Editorials & reviews   |
| — — —. 2018. 'Poster Abstracts - Post Acute and Long Term Care Medicine 2018', Journal of the American Medical Directors Association. Conference: Society for Post Acute and Long Term Care Medicine Annual Conference, 19.                                                                          | Document type: Editorials & reviews   |
| Adams, E. K., R. Houchens, G. E. Wright, and J. Robbins. 1991. 'Predicting hospital choice for rural Medicare beneficiaries: the role of severity of illness', Health Services Research, 26: 583-612.                                                                                                | Population: Not multimorbid           |
| Adeniji, C., C. Kenning, P. A. Coventry, and P. Bower. 2015. 'What are the core predictors of 'hassles' among patients with multimorbidity in primary care? A cross sectional study', BMC Health Services Research, 15: 255.                                                                         | Outcome: Preferences not addressed    |
| Aikens, J. E., D. E. Nease Jr, and M. S. Klinkman. 2008. 'Explaining patients' beliefs about the necessity and harmfulness of antidepressants', Annals of Family Medicine, 6: 23-29.                                                                                                                 | Population: Age <60 yrs.              |
| Akpan, A., C. Roberts, G. Turner, and J. Banerjee. 2017. 'Developing an internationally agreed standard set of health outcome measures for older people', Age and Ageing, 46 (Supplement 1): i35.                                                                                                    | Outcome: Preferences not addressed    |
| Al Onazi, M., M. Al Jondeby, M. Azeem, and A. Al Sayyari. 2011. 'Factors affecting Saudi hemodialysis patients' perception of healthcare providers' empathy', Arab journal of nephrology and transplantation, 4: 71-76.                                                                              | Outcome: Preferences not addressed    |
| Alami, S., D. Desjeux, M. M. Lefevre-Colau, A. S. Boisgard, E. Boccard, F. Rannou, and S. Poiraudau. 2011. 'Management of pain induced by exercise and mobilization during physical therapy programs: views of patients and care providers', BMC Musculoskeletal Disorders, 12: 172.                 | Population: Age <60 yrs.              |
| Albada, A., and M. Triemstra. 2009. 'Patients' priorities for ambulatory hospital care centres. A survey and discrete choice experiment among elderly and chronically ill patients of a Dutch hospital', Health Expect, 12: 92-105.                                                                  | Population: Age <60 yrs.              |
| Alderman, A. K., S. T. Hawley, J. Waljee, M. Mujahid, M. Morrow, and S. J. Katz. 2008. 'Understanding the impact of breast reconstruction on the surgical decision-making process for breast cancer', Cancer, 112: 489-94.                                                                           | Population: Age <60 yrs.              |
| Allen, D., V. Badro, L. Denyer-Willis, M. Ellen Macdonald, A. Pare, T. Hutchinson, P. Barre, R. Beauchemin, H. Bocti, A. Broadbent, and S. R. Cohen. 2015. 'Fragmented care and whole-person illness: Decision-making for people with chronic end-stage kidney disease', Chronic Illness, 11: 44-55. | Outcome: Preferences not addressed    |
| AlRuthia, Yazed Sulaiman. 2016. 'The value of online medication rating systems to older adults and their association with self-reported outcomes', 76.                                                                                                                                               | Outcome: Preferences not addressed    |
| Alsinnawi, M., A. E. Slee, J. S. Banerji, K. L. Dahl, S. Akapame, Iii J. D. Massman, E. M. Wolff, and J. M. Corman. 2016. 'Does a clear understanding of life expectancy increase decisional conflict and anxiety for men with newly diagnosed prostate cancer?', Journal of Urology, 1): e31.       | Document type: Conference proceedings |

|                                                                                                                                                                                                                                                                         |                                                                                                                                                                                                                                                                                                                                                              |                                       |
|-------------------------------------------------------------------------------------------------------------------------------------------------------------------------------------------------------------------------------------------------------------------------|--------------------------------------------------------------------------------------------------------------------------------------------------------------------------------------------------------------------------------------------------------------------------------------------------------------------------------------------------------------|---------------------------------------|
| 1<br>2<br>3<br>4<br>5<br>6<br>7<br>8<br>9<br>10<br>11<br>12<br>13<br>14<br>15<br>16<br>17<br>18<br>19<br>20<br>21<br>22<br>23<br>24<br>25<br>26<br>27<br>28<br>29<br>30<br>31<br>32<br>33<br>34<br>35<br>36<br>37<br>38<br>39<br>40<br>41<br>42<br>43<br>44<br>45<br>46 | Amblas-Novellas, J., J. Espauella, L. Rexach, B. Fontecha, M. Inzitari, C. Blay, and X. Gomez-Batiste. 2015. 'Frailty, severity, progression and shared decision-making: A pragmatic framework for the challenge of clinical complexity at the end of life', <i>European Geriatric Medicine</i> , 6: 189-94.                                                 | Population: Age <60 yrs.              |
|                                                                                                                                                                                                                                                                         | Anonymous. 2013. '2013 CAEP/ACMU Scientific Abstracts, CAEP 2013', <i>Canadian Journal of Emergency Medicine</i> , 15 (Suppl 1): S1.                                                                                                                                                                                                                         | Document type: Editorials & reviews   |
|                                                                                                                                                                                                                                                                         | Apkarian, A. Vania, Yamaya Sosa, Beth R. Krauss, P. Sebastian Thomas, Bruce E. Fredrickson, Robert E. Levy, R. Norman Harden, and Dante R. Chialvo. 2004. 'Chronic pain patients are impaired on an emotional decision-making task', <i>Pain</i> , 108: 129-36.                                                                                              | Population: Age <60 yrs.              |
|                                                                                                                                                                                                                                                                         | Arain, A., M. Tammaa, F. Chaudhary, S. Gill, S. Yousuf, N. Bangalore-Vittal, P. Singh, S. Jabeen, S. Ali, Y. Song, and N. J. Azar. 2016. 'Communicating the diagnosis of psychogenic nonepileptic seizures: The patient perspective', <i>Journal of Clinical Neuroscience</i> , 28: 67-70.                                                                   | Population: Age <60 yrs.              |
|                                                                                                                                                                                                                                                                         | Arends, R. Y., C. Bode, E. Taal, and M. A. Van de Laar. 2013. 'The role of goal management for successful adaptation to arthritis', <i>Patient Education &amp; Counseling</i> , 93: 130-8.                                                                                                                                                                   | Population: Not multimorbid           |
|                                                                                                                                                                                                                                                                         | Arora, N. K., B. B. Reeve, R. D. Hays, S. B. Clauser, and I. Oakley-Girvan. 2011. 'Assessment of quality of cancer-related follow-up care from the cancer survivor's perspective', <i>Journal of Clinical Oncology</i> , 29: 1280-9.                                                                                                                         | Population: Not multimorbid           |
|                                                                                                                                                                                                                                                                         | Aspinall, P. A., Z. K. Johnson, A. Azuara-Blanco, A. Montarzino, R. Brice, and A. Vickers. 2008. 'Evaluation of quality of life and priorities of patients with glaucoma', <i>Investigative Ophthalmology and Visual Science</i> , 49: 1907-15.                                                                                                              | Population: Not multimorbid           |
|                                                                                                                                                                                                                                                                         | Audulv, Å, K. Norbergh, K. Asplund, and Å Hörnsten. 2009. 'An ongoing process of inner negotiation -- a Grounded Theory study of self-management among people living with chronic illness', <i>Journal of Nursing &amp; Healthcare of Chronic Illnesses</i> , 1: 283-93.                                                                                     | Population: Age <60 yrs.              |
|                                                                                                                                                                                                                                                                         | Auerbach, A. D., R. Katz, S. Z. Pantilat, R. Bernacki, J. Schnipper, P. Kaboli, T. Wetterneck, D. Gonzales, V. Arora, J. Zhang, and D. Meltzer. 2008. 'Factors associated with discussion of care plans and code status at the time of hospital admission: Results from the Multicenter Hospitalist Study', <i>Journal of Hospital Medicine</i> , 3: 437-45. | Outcome: Preferences not addressed    |
|                                                                                                                                                                                                                                                                         | Bagge, M., J. Tordoff, P. Norris, and S. Heydon. 2013. 'Older people's attitudes towards their regular medicines', <i>J Prim Health Care</i> , 5: 234-42.                                                                                                                                                                                                    | Outcome: Preferences not addressed    |
|                                                                                                                                                                                                                                                                         | Baijal, G., T. Gupta, C. Hotwani, S. G. Laskar, A. Budrukkar, V. Murthy, and J. P. Agarwal. 2012. 'Impact of comorbidity on therapeutic decision-making in head and neck cancer: audit from a comprehensive cancer center in India', <i>Head &amp; Neck</i> , 34: 1251-4.                                                                                    | Population: Age <60 yrs.              |
|                                                                                                                                                                                                                                                                         | Baker, Tamara A., Melissa L. O'Connor, Rosalyn Roker, and Jessica L. Krok. 2013. 'Satisfaction With Pain Treatment in Older Cancer Patients', <i>Journal of Hospice &amp; Palliative Nursing</i> , 15: 455-63.                                                                                                                                               | Outcome: Preferences not addressed    |
|                                                                                                                                                                                                                                                                         | Ballantyne, P. J., M. A. M. Gignac, and G. A. Hawker. 2007. 'A patient-centered perspective on surgery avoidance for hip or knee arthritis: Lessons for the future', <i>Arthritis Care and Research</i> , 57: 27-34.                                                                                                                                         | Outcome: Preferences not addressed    |
|                                                                                                                                                                                                                                                                         | Bardai, A., S. H. M. Brown, U. Hafeez, and A. H. Abdelhafiz. 2013. 'Survey exploring elderly patients' viewpoints of the multi-compartment compliance aids', <i>Age and Ageing</i> , 2): ii5.                                                                                                                                                                | Document type: Conference proceedings |

|                                                                                                                                                                                                                                                                                                   |                                       |
|---------------------------------------------------------------------------------------------------------------------------------------------------------------------------------------------------------------------------------------------------------------------------------------------------|---------------------------------------|
| Barron, J., M. Bedra, J. Wood, and J. Finkelstein. 2014. 'Exploring three perspectives on feasibility of a patient portal for older adults', <i>Studies in health technology and informatics</i> , 202: 181-84.                                                                                   | Outcome: Preferences not addressed    |
| Bartlett Ellis, Rebecca J., and Janet L. Welch. 2017. 'Medication-taking behaviours in chronic kidney disease with multiple chronic conditions: a meta-ethnographic synthesis of qualitative studies', <i>Journal of Clinical Nursing</i> , 26: 586-98.                                           | Document type: Editorials & reviews   |
| Bayliss, E. A., J. F. Steiner, D. H. Fernald, L. A. Crane, and D. S. Main. 2003. 'Descriptions of barriers to self-care by persons with comorbid chronic diseases', <i>Ann Fam Med</i> , 1: 15-21.                                                                                                | Outcome: Preferences not addressed    |
| Beaulaurier, R. L., M. J. Mintzer, D. T. D'Amore, and M. Torres. 2016. 'Social factors in non-urgent use of an emergency department by the elderly', <i>Journal of the American Geriatrics Society</i> , 1): S191-S92.                                                                            | Document type: Conference proceedings |
| Bell, S. P., and A. Saraf. 2014. 'Risk stratification in very old adults: How to best gauge risk as the basis of management choices for patients aged over 80', <i>Progress in Cardiovascular Diseases</i> , 57: 197-203.                                                                         | Outcome: Preferences not addressed    |
| Benham-Hutchins, M., N. Stagers, M. Mackert, A. H. Johnson, and D. deBronkart. 2017. "'I want to know everything": a qualitative study of perspectives from patients with chronic diseases on sharing health information during hospitalization', <i>BMC Health Services Research</i> , 17: 529.  | Population: Age <60 yrs.              |
| Bennahum, D. A., W. B. Forman, B. Vellas, and I. L. Albarède. 1997. 'Life expectancy, comorbidity, and quality of life - A framework of reference for medical decisions', <i>Clinics in Geriatric Medicine</i> , 13: 33-&.                                                                        | Document type: Editorials & reviews   |
| Benson, J., and N. Britten. 2002. 'Patients' decisions about whether or not to take antihypertensive drugs: qualitative study', <i>British Medical Journal</i> , 325: 873-76A.                                                                                                                    | Population: Not multimorbid           |
| Bergin, R., J. Emery, R. Bollard, and V. White. 2017. 'How rural and urban patients in Australia with colorectal or breast cancer experience choice of treatment provider: A qualitative study', <i>European Journal of Cancer Care</i> , 26: n/a-n/a.                                            | Population: Not multimorbid           |
| Berna, F., A. S. Goritz, P. M. Llorca, P. Vidailhet, G. Fond, and S. Moritz. 2017. 'Would I take antipsychotics, if I had psychotic symptoms? Examining determinants of the decision to take antipsychotics', <i>Progress in Neuro-Psychopharmacology and Biological Psychiatry</i> , 77: 155-63. | Population: Age <60 yrs.              |
| Berner, Y. N. 2018. '[Patient Oriented Care in Chronic Conditions]', <i>Harefuah</i> , 157: 228-31.                                                                                                                                                                                               | Outcome: Preferences not addressed    |
| Beverly, E. A., L. A. Wray, C. J. Chiu, and C. L. LaCoe. 2014. 'Older Adults' Perceived Challenges With Health Care Providers Treating Their Type 2 Diabetes and Comorbid Conditions', <i>Cd (Clinical Diabetes)</i> , 32: 12-7.                                                                  | Outcome: Preferences not addressed    |
| Blackhall, L. J., S. T. Murphy, G. Frank, V. Michel, and S. Azen. 1995. 'ETHNICITY AND ATTITUDES TOWARD PATIENT AUTONOMY', <i>Jama-Journal of the American Medical Association</i> , 274: 820-25.                                                                                                 | Population: Not multimorbid           |
| Bleicher, R. J., P. Abrahamse, S. T. Hawley, S. J. Katz, and M. Morrow. 2008. 'The influence of age on the breast surgery decision-making process', <i>Annals of Surgical Oncology</i> , 15: 854-62.                                                                                              | Population: Not multimorbid           |

|                       |                                                                                                                                                                                                                                                                                                                                                                                                 |                                     |
|-----------------------|-------------------------------------------------------------------------------------------------------------------------------------------------------------------------------------------------------------------------------------------------------------------------------------------------------------------------------------------------------------------------------------------------|-------------------------------------|
| 1<br>2<br>3<br>4<br>5 | Blom, J. W., M. El Azzi, D. M. Wopereis, L. Glynn, C. Muth, and M. L. van Driel. 2015. 'Reporting of patient-centred outcomes in heart failure trials: are patient preferences being ignored?', <i>Heart Failure Reviews</i> , 20: 385-92.                                                                                                                                                      | Outcome: Preferences not addressed  |
| 6<br>7<br>8<br>9      | Blome, C., A. Costanzo, E. Dauden, C. Ferrandiz, G. Girolomoni, R. Gniadecki, L. Iversen, A. Menter, K. Michaelis-Wittern, A. Morita, H. Nakagawa, K. Reich, and M. Augustin. 2016. 'Patient-relevant needs and treatment goals in nail psoriasis', <i>Quality of Life Research: An International Journal of Quality of Life Aspects of Treatment, Care &amp; Rehabilitation</i> , 25: 1179-88. | Population: Age <60 yrs.            |
| 10<br>11<br>12        | Boehmer, K. R., A. Abu Dabrh, M. R. Gionfriddo, P. Erwin, and V. M. Montori. 2018. 'Does the chronic care model meet the emerging needs of people living with multimorbidity? A systematic review and thematic synthesis', <i>PLoS ONE</i> , 13: 17.                                                                                                                                            | Document type: Editorials & reviews |
| 13<br>14              | Boeni, F., K. E. Hersberger, and I. Arnet. 2014. 'Multidrug punch cards in primary care: A mixed methods study on patients' preferences and impact on adherence', <i>Frontiers in Pharmacology</i> , 5 (SEP) (no pagination).                                                                                                                                                                   | Outcome: Preferences not addressed  |
| 15<br>16<br>17        | Bokhof, B., and U. Junius-Walker. 2016. 'Reducing Polypharmacy from the Perspectives of General Practitioners and Older Patients: A Synthesis of Qualitative Studies', <i>Drugs and Aging</i> , 33: 249-66.                                                                                                                                                                                     | Document type: Editorials & reviews |
| 18<br>19<br>20<br>21  | Bonney, A., S. C. Jones, and D. Iverson. 2012. 'The older patient, the general practitioner and the trainee: patients' attitudes and implications for training', <i>Education for primary care : an official publication of the Association of Course Organisers, National Association of GP Tutors, World Organisation of Family Doctors</i> , 23: 186-95.                                     | Population: Not multimorbid         |
| 22<br>23              | Bonney, A., S. C. Jones, L. Phillipson, and D. Iverson. 2010. 'General practice registrars - attitudes of older patients', <i>Australian Family Physician</i> , 39: 419-24.                                                                                                                                                                                                                     | Population: Not multimorbid         |
| 24<br>25<br>26        | Borgsteede, S. D., L. Deliens, C. Graafland-Riedstra, A. L. Francke, G. van der Wal, and D. L. Willems. 2007. 'Communication about euthanasia in general practice: opinions and experiences of patients and their general practitioners', <i>Patient Educ Couns</i> , 66: 156-61.                                                                                                               | Outcome: Preferences not addressed  |
| 27<br>28<br>29<br>30  | Borum, M. L., J. Lynn, and Z. Zhong. 2000. 'Blood transfusion administration in seriously ill patients: an evaluation of SUPPORT data. Study to Understand Prognoses and Preferences for Outcomes and Risks of Treatments', <i>Journal of the American Geriatrics Society</i> , 48: S39-43.                                                                                                     | Population: Not multimorbid         |
| 31<br>32              | Bove, A. M., A. D. Lynch, C. Ammendolia, and M. Schneider. 2018. 'Patients' experience with nonsurgical treatment for lumbar spinal stenosis: a qualitative study', <i>Spine Journal: Official Journal of the North American Spine Society</i> , 18: 639-47.                                                                                                                                    | Population: Not multimorbid         |
| 33<br>34              | Bower, P. 2013. 'Multimorbidity in patients with arthritis: Experience of care and self-management', <i>Rheumatology (United Kingdom)</i> , 1): i3.                                                                                                                                                                                                                                             | Duplicates                          |
| 35<br>36<br>37        | Bower, P., M. Hann, J. Rick, K. Rowe, J. Burt, M. Roland, J. Protheroe, G. Richardson, and D. Reeves. 2013. 'Multimorbidity and delivery of care for long-term conditions in the English National Health Service: baseline data from a cohort study', <i>Journal of health services research &amp; policy</i> , 18: 29-37.                                                                      | Outcome: Preferences not addressed  |
| 38<br>39<br>40        | Bowling, A., and S. Ebrahim. 2001. 'Measuring patients' preferences for treatment and perceptions of risk', <i>Quality in Health Care</i> , 10: I2-I8.                                                                                                                                                                                                                                          | Document type: Editorials & reviews |

1  
2  
3  
4  
5  
6  
7  
8  
9  
10  
11  
12  
13  
14  
15  
16  
17  
18  
19  
20  
21  
22  
23  
24  
25  
26  
27  
28  
29  
30  
31  
32  
33  
34  
35  
36  
37  
38  
39  
40  
41  
42  
43  
44  
45  
46

|                                                          |                                                                                                                                                                                                                                                                                                                                                        |                                       |
|----------------------------------------------------------|--------------------------------------------------------------------------------------------------------------------------------------------------------------------------------------------------------------------------------------------------------------------------------------------------------------------------------------------------------|---------------------------------------|
| 1<br>2<br>3<br>4<br>5                                    | Brabers, A. E. M., T. E. M. van Esch, P. P. Groenewegen, K. Hek, P. Mullenders, L. van Dijk, and J. D. de Jong. 2018. 'Is there a conflict between general practitioners applying guidelines for antibiotic prescribing and including their patients' preferences?', <i>Patient Preference and Adherence</i> , 12: 9-19.                               | Population: Age <60 yrs.              |
| 6<br>7<br>8                                              | Bratzke, L. C., R. J. Muehrer, K. A. Kehl, K. S. Lee, E. C. Ward, and K. L. Kwekkeboom. 2015. 'Self-management priority setting and decision-making in adults with multimorbidity: A narrative review of literature', <i>International Journal of Nursing Studies</i> , 52: 744-55.                                                                    | Document type: Editorials & reviews   |
| 9<br>10<br>11<br>12                                      | Brazier, J. E., D. Rowen, I. Mavranezouli, A. Tsuchiya, T. Young, Y. Yang, M. Barkham, and R. Ibbotson. 2012. 'Developing and testing methods for deriving preference-based measures of health from condition-specific measures (and other patient-based measures of outcome)', <i>Health technology assessment (Winchester, England)</i> , 16: 1-114. | Population: Not multimorbid           |
| 13<br>14<br>15                                           | Bridges, J., J. Hughes, N. Farrington, and A. Richardson. 2015. 'Cancer treatment decision-making processes for older patients with complex needs: a qualitative study', <i>BMJ Open</i> , 5: e009674.                                                                                                                                                 | Population: Age <60 yrs.              |
| 16<br>17<br>18                                           | Brimblecombe, C., D. Crosbie, W. K. Lim, and B. Hayes. 2014. 'The goals of patient care project: Implementing a proactive approach to patient-centred decision-making', <i>Internal Medicine Journal</i> , 44: 961-66.                                                                                                                                 | Outcome: Preferences not addressed    |
| 19<br>20                                                 | Burke, J. A., M. Earley, L. D. Dixon, A. Wilke, and S. Puczynski. 2006. 'Patients with diabetes speak: Exploring the implications of patients' perspectives for their diabetes appointments', <i>Health Communication</i> , 19: 103-14.                                                                                                                | Population: Age <60 yrs.              |
| 21<br>22                                                 | Burkiewicz, J. S., K. S. Vesta, and A. L. Hume. 2008. 'Improving effectiveness in communicating risk to patients', <i>Consultant Pharmacist</i> , 23: 37-43.                                                                                                                                                                                           | Outcome: Preferences not addressed    |
| 23<br>24<br>25<br>26                                     | Burton, M., F. Armitage, K. Collins, P. Richards, A. Nettleship, K. Lifford, and L. Wyld. 2016. 'The development of an on-line decision tool for health care professionals to aid collaborative decision making with older women with breast cancer', <i>European Journal of Cancer</i> , 2): S136.                                                    | Outcome: Preferences not addressed    |
| 27<br>28                                                 | Buttery, A., K. Lowton, K. Glaser, and G. Carr-White. 2011. 'Older heart failure patients' preferences for cardiac rehabilitation service models', <i>European Heart Journal</i> , 1): 159.                                                                                                                                                            | Document type: Conference proceedings |
| 29<br>30<br>31                                           | Calpin, P., A. Imran, and D. Harmon. 2017. 'A Comparison of Expectations of Physicians and Patients with Chronic Pain for Pain Clinic Visits', <i>Pain Practice</i> , 17: 305-11.                                                                                                                                                                      | Population: Age <60 yrs.              |
| 32<br>33<br>34                                           | Camacho, D., E. Estrada, I. T. Lagomasino, and J. Green. 2015. 'Depression treatment adherence and preferences among older latinos in a specialty geriatric clinic', <i>American Journal of Geriatric Psychiatry</i> , 1): S136-S37.                                                                                                                   | Document type: Conference proceedings |
| 35<br>36                                                 | Campbell, S. M., C. Gately, and L. Gask. 2007. 'Identifying the patient perspective of the quality of mental healthcare for common chronic problems: A qualitative study', <i>Chronic Illness</i> , 3: 46-65.                                                                                                                                          | Population: Age <60 yrs.              |
| 37<br>38<br>39<br>40<br>41<br>42<br>43<br>44<br>45<br>46 | Carlin, C. S., J. B. Christianson, P. Keenan, and M. Finch. 2012. 'Chronic illness and patient satisfaction', <i>Health Services Research</i> , 47: 2250-72.                                                                                                                                                                                           | Population: Age <60 yrs.              |

|                            |                                                                                                                                                                                                                                                                                                                                                                                                                                                                                                           |                                       |
|----------------------------|-----------------------------------------------------------------------------------------------------------------------------------------------------------------------------------------------------------------------------------------------------------------------------------------------------------------------------------------------------------------------------------------------------------------------------------------------------------------------------------------------------------|---------------------------------------|
| 1<br>2<br>3<br>4<br>5      | Caron-Flinterman, J. F., J. E. W. Broerse, J. Teerling, and J. F. G. Bunders. 2005. 'Patients' priorities concerning health research: The case of asthma and COPD research in the Netherlands', <i>Health Expectations</i> , 8: 253-63.                                                                                                                                                                                                                                                                   | Population: Age <60 yrs.              |
| 6<br>7<br>8                | Case, S. M., J. O'Leary, N. Kim, M. E. Tinetti, and T. R. Fried. 2014. 'Relationship between universal health outcome priorities and willingness to take medication for primary prevention of myocardial infarction', <i>Journal of the American Geriatrics Society</i> , 62: 1753-58.                                                                                                                                                                                                                    | Outcome: Preferences not addressed    |
| 9<br>10<br>11              | Case, S. M., V. R. Towle, and T. R. Fried. 2013. 'Considering the balance: Development of a scale to assess patient views on trade-offs in competing health outcomes', <i>Journal of the American Geriatrics Society</i> , 61: 1331-36.                                                                                                                                                                                                                                                                   | Outcome: Preferences not addressed    |
| 12<br>13                   | Cassimatis, Mandy, David J. Kavanagh, and Anthony C. Smith. 2014. 'Perceived needs for supported self-management of type 2 diabetes: A qualitative investigation of the potential for a web-based intervention', <i>Australian Psychologist</i> , 49: 75-85.                                                                                                                                                                                                                                              | Population: Age <60 yrs.              |
| 14<br>15<br>16<br>17       | Caughey, G. E., E. Huynh, S. Shakib, J. M. Rose, and J. Swait. 2017. 'Influence of medication risks and benefits on patient and clinician preferences for treatment in multimorbidity: A discrete-choice experiment', <i>Pharmacoepidemiology and Drug Safety</i> , 26 (Supplement 2): 447.                                                                                                                                                                                                               | Document type: Conference proceedings |
| 18<br>19                   | Chang, Wenhong, and Changxiang Chen. 2016. 'Survey of medical treatment and medication status and satisfaction of elderly patients with chronic diseases in Hebei province', <i>Chinese Nursing Research</i> , 30: 22-26.                                                                                                                                                                                                                                                                                 | Outcome: Preferences not addressed    |
| 20<br>21                   | Charette, Susan L., Maristela Barui Garcia, David B. Reuben, Benjamin A. Bensadon, and Benjamin A. Bensadon. 2015. 'Goal-oriented care': 1-19.                                                                                                                                                                                                                                                                                                                                                            | Document type: Editorials & reviews   |
| 22<br>23<br>24<br>25<br>26 | Chekerov, R., P. Harter, S. Fuxius, L. C. Hanker, L. Woelber, L. Muller, P. Klare, W. Abenhardt, Y. Nedkova, I. Yalcinkaya, G. Heinrich, H. Sommer, S. Mahner, P. Wimberger, D. Koensgen-Mustea, R. Richter, G. Oskay-Oezcelik, and J. Sehouli. 2017. 'Preference of elderly patients' to oral or intravenous chemotherapy in heavily pre-treated recurrent ovarian cancer: final results of a prospective multicenter trial', <i>Gynecologic Oncology Research and Practice</i> , 4 (1) (no pagination). | Population: Not multimorbid           |
| 27<br>28<br>29             | Chen, H., W. E. Haley, B. E. Robinson, and R. S. Schonwetter. 2003. 'Decisions for hospice care in patients with advanced cancer', <i>Journal of the American Geriatrics Society</i> , 51: 789-97.                                                                                                                                                                                                                                                                                                        | Population: Not multimorbid           |
| 30<br>31<br>32             | Chen, T. T., T. H. Tung, Y. S. Hsueh, M. H. Tsai, H. M. Liang, K. L. Li, K. P. Chung, and C. H. Tang. 2015. 'Measuring Preferences for a Diabetes Pay-for-Performance for Patient (P4P4P) Program using a Discrete Choice Experiment', <i>Value in Health</i> , 18: 578-86.                                                                                                                                                                                                                               | Population: Not multimorbid           |
| 33<br>34                   | Cheong, L. H., C. L. Armour, and S. Z. Bosnic-Anticevich. 2013. 'Multidisciplinary collaboration in primary care: through the eyes of patients', <i>Australian Journal of Primary Health</i> , 19: 190-7.                                                                                                                                                                                                                                                                                                 | Population: Age <60 yrs.              |
| 35<br>36<br>37             | Chia, Y., X. H. Low, A. Chan, and K. Yap. 2012. 'Improving drug-related problems in oncology through technology: Preferences of Asian patients with cancer', <i>International Journal of Pharmacy Practice</i> , 2): 32.                                                                                                                                                                                                                                                                                  | Population: Not multimorbid           |
| 38<br>39<br>40             | Chow, A., J. Presseau, I. Perelman, L. Sikora, and D. Fergusson. 2018. 'Personal goal-setting among women living with breast cancer: protocol for a scoping review', <i>Syst Rev</i> , 7: 132.                                                                                                                                                                                                                                                                                                            | Population: Not multimorbid           |

|                       |                                                                                                                                                                                                                                                                                                                                    |                                                    |
|-----------------------|------------------------------------------------------------------------------------------------------------------------------------------------------------------------------------------------------------------------------------------------------------------------------------------------------------------------------------|----------------------------------------------------|
| 1<br>2<br>3<br>4<br>5 | Chow, A., J. Presseau, I. Perelman, L. Sikora, and D. Fergusson. 2018. 'Personal goal-setting among women living with breast cancer: protocol for a scoping review', <i>Syst Rev</i> , 7: 132.                                                                                                                                     | Document type: Study protocols                     |
| 6<br>7                | Chung, G. S., R. E. Lawrence, F. A. Curlin, V. Arora, and D. O. Meltzer. 2012. 'Predictors of hospitalised patients' preferences for physician-directed medical decision-making', <i>Journal of Medical Ethics</i> , 38: 77-82.                                                                                                    | Population: Age <60 yrs.                           |
| 8<br>9<br>10          | Clancy, C. M., R. D. Cebul, and S. V. Williams. 1988. 'GUIDING INDIVIDUAL DECISIONS - A RANDOMIZED, CONTROLLED TRIAL OF DECISION-ANALYSIS', <i>American Journal of Medicine</i> , 84: 283-88.                                                                                                                                      | Outcome: Preferences from physicians or caregivers |
| 11<br>12<br>13        | Clarke, G., E. Fistein, A. Holland, M. Barclay, P. Theimann, and S. Barclay. 2017. 'Preferences for care towards the end of life when decision-making capacity may be impaired: A large scale cross-sectional survey of public attitudes in Great Britain and the United States', <i>PLoS ONE</i> , 12: 18.                        | Population: Not multimorbid                        |
| 14<br>15<br>16        | Clarke, L. H., E. V. Bennett, and A. Korotchenko. 2014. 'Negotiating vulnerabilities: how older adults with multiple chronic conditions interact with physicians', <i>Canadian journal on aging = La revue canadienne du vieillissement</i> , 33: 26-37.                                                                           | Outcome: Preferences not addressed                 |
| 17<br>18<br>19        | Clarke, M. G., K. P. Kennedy, and R. P. MacDonagh. 2008. 'Discussing life expectancy with surgical patients: Do patients want to know and how should this information be delivered?', <i>BMC Medical Informatics and Decision Making</i> , 8 (no pagination).                                                                      | Population: Not multimorbid                        |
| 20<br>21              | Clausen, G., M. Borchelt, C. Janssen, S. Loos, L. Mull, and H. Pfaff. 2006. '[Patient satisfaction and geriatric care - an empirical study]', <i>Zeitschrift fur Gerontologie und Geriatrie</i> , 39: 48-56.                                                                                                                       | Population: Not multimorbid                        |
| 22<br>23<br>24        | Clement, N. D., and R. Burnett. 2013. 'Patient satisfaction after total knee arthroplasty is affected by their general physical well-being', <i>Knee Surgery, Sports Traumatology, Arthroscopy</i> , 21: 2638-46.                                                                                                                  | Outcome: Preferences not addressed                 |
| 25<br>26<br>27        | Clement, N. D., D. Macdonald, R. Burnett, A. H. R. W. Simpson, and C. R. Howie. 2017. 'A patient's perception of their hospital stay influences the functional outcome and satisfaction of total knee arthroplasty', <i>Archives of Orthopaedic and Trauma Surgery</i> , 137: 693-700.                                             | Outcome: Preferences not addressed                 |
| 28<br>29<br>30        | Clever, S. L., L. Jin, W. Levinson, and D. O. Meltzer. 2008. 'Does doctor-patient communication affect patient satisfaction with hospital care? Results of an analysis with a novel instrumental variable', <i>Health Services Research</i> , 43: 1505-19.                                                                         | Population: Age <60 yrs.                           |
| 31<br>32<br>33        | Clough-Gorr, K. M., L. Noti, P. Brauchli, R. Cathomas, M. R. Fried, G. Roberts, A. E. Stuck, F. Hitz, and U. Mey. 2013. 'The SAKK cancer-specific geriatric assessment (C-SGA): a pilot study of a brief tool for clinical decision-making in older cancer patients', <i>BMC Medical Informatics and Decision Making</i> , 13: 93. | Outcome: Preferences not addressed                 |
| 34<br>35<br>36        | Clyne, B., J. A. Cooper, F. Boland, C. M. Hughes, T. Fahey, S. M. Smith, and team Opti-Script study. 2017. 'Beliefs about prescribed medication among older patients with polypharmacy: a mixed methods study in primary care', <i>British Journal of General Practice</i> , 67: e507-e18.                                         | Outcome: Preferences not addressed                 |
| 37<br>38<br>39<br>40  | Col, N. F., L. Ngo, J. M. Fortin, R. J. Goldberg, and A. M. O'Connor. 2007. 'Can computerized decision support help patients make complex treatment decisions? A randomized controlled trial of an individualized menopause decision aid', <i>Medical Decision Making</i> , 27: 585-98.                                            | Population: Age <60 yrs.                           |



|                                                                                                                                                                                                                                                                                                                                                                                                                                                                               |                                       |
|-------------------------------------------------------------------------------------------------------------------------------------------------------------------------------------------------------------------------------------------------------------------------------------------------------------------------------------------------------------------------------------------------------------------------------------------------------------------------------|---------------------------------------|
| Combes, G., K. Sein, and K. Allen. 2017. 'How does pre-dialysis education need to change? Findings from a qualitative study with staff and patients', BMC Nephrology, 18 (1) (no pagination).                                                                                                                                                                                                                                                                                 | Population: Not multimorbid           |
| Commisso, E., K. S. McGilton, A. P. Ayala, M. K. Andrew, H. Bergman, L. Beaudet, V. Dube, M. Gray, L. Hale, M. Keatings, E. G. Marshall, J. McElhaney, D. Morgan, E. Parrott, J. Ploeg, T. Sampalli, D. Stephens, I. Vedel, J. Walker, W. P. Wodchis, and M. T. E. Puts. 2017. 'Identifying and understanding the health and social care needs of older adults with multiple chronic conditions and their caregivers: a protocol for a scoping review', BMJ Open, 7: e018247. | Document type: Study protocols        |
| Cooper, V., J. Clatworthy, E. Youssef, C. Llewellyn, A. Miners, M. Lagarde, M. Sachikonye, N. Perry, E. Nixon, A. Pollard, C. Sabin, C. Foreman, and M. Fisher. 2016. 'Which aspects of health care are most valued by people living with HIV in high-income countries? A systematic review', BMC Health Services Research, 16: 677.                                                                                                                                          | Population: Age <60 yrs.              |
| Cooper, V., J. Clatworthy, E. Youssef, N. Perry, E. Nixon, M. Fisher, A. Pollard, C. Llewellyn, A. Miners, M. Lagarde, M. Sachikonye, C. Sabin, and C. Foreman. 2015. 'What aspects of health care are most valued by people living with HIV? Results of a systematic review', HIV Medicine, 2): 74.                                                                                                                                                                          | Population: Age <60 yrs.              |
| Courtin, S., T. Hughes, E. Giovannetti, J. Wolff, C. Rand, and C. Boyd. 2011. 'Experiences of treatment burden in community-dwelling multimorbid older adults and caregivers', Journal of the American Geriatrics Society, 1): S88.                                                                                                                                                                                                                                           | Document type: Conference proceedings |
| Coventry, P. A., N. Small, M. Panagioti, I. Adeyemi and P. Bee. 2015. 'Living with complexity; marshalling resources: a systematic review and qualitative meta-synthesis of lived experience of mental and physical multimorbidity', BMC Family Practice, 16):171                                                                                                                                                                                                             | Document type: Editorials & reviews   |
| Coxon, D., M. Frisher, C. Jinks, K. Jordan, Z. Paskins, and G. Peat. 2015. 'The relative importance of perceived doctor's attitude on the decision to consult for symptomatic osteoarthritis: a choice-based conjoint analysis study', BMJ Open, 5: e009625.                                                                                                                                                                                                                  | Population: Not multimorbid           |
| Coyle, J., and B. Williams. 2001. 'Valuing people as individuals: development of an instrument through a survey of person-centredness in secondary care', Journal of Advanced Nursing, 36: 450-59.                                                                                                                                                                                                                                                                            | Population: Age <60 yrs.              |
| Craftman, A. G., M. Westerbotn, E. von Strauss, P. Hilleras, and L. M. Hammar. 2015. 'Older people's experience of utilisation and administration of medicines in a health- and social care context', Scandinavian Journal of Caring Sciences, 29: 760-68.                                                                                                                                                                                                                    | Outcome: Preferences not addressed    |
| Cybulski, M., L. Cybulski, E. Krajewska-Kulak, M. Orzechowska, and U. Cwalina. 2018. 'Preferences and attitudes of older adults of Bialystok, Poland toward the use of over-the-counter drugs', Clinical Interventions in Aging, 13: 623-32.                                                                                                                                                                                                                                  | Population: Not multimorbid           |
| Cykert, S., P. Dilworth-Anderson, M. H. Monroe, P. Walker, F. R. McGuire, G. Corbie-Smith, L. J. Edwards, and A. J. Bunton. 2010. 'Factors associated with decisions to undergo surgery among patients with newly diagnosed early-stage lung cancer', JAMA, 303: 2368-76.                                                                                                                                                                                                     | Population: Not multimorbid           |
| Damm, K., J. Volk, A. Horn, J. P. Allam, N. Troensegaard-Petersen, N. Serup-Hansen, T. Winkler, I. Thiessen, K. Borchert, E. G. Wustenberg, and T. Mittendorf. 2016. 'Patient preferences in allergy immunotherapy (AIT) in Germany - a discrete-choice-experiment', Health Economics Review, 6 (1) (no pagination).                                                                                                                                                          | Population: Age <60 yrs.              |

|                       |                                                                                                                                                                                                                                                                                                                                                                                                   |                                       |
|-----------------------|---------------------------------------------------------------------------------------------------------------------------------------------------------------------------------------------------------------------------------------------------------------------------------------------------------------------------------------------------------------------------------------------------|---------------------------------------|
| 1<br>2<br>3<br>4<br>5 | Danis, M., J. Garrett, R. Harris, and D. L. Patrick. 1994. 'STABILITY OF CHOICES ABOUT LIFE-SUSTAINING TREATMENTS', <i>Annals of Internal Medicine</i> , 120: 567-73.                                                                                                                                                                                                                             | Population: Not multimorbid           |
| 6<br>7<br>8           | Dattalo, M., C. E. Boulton, S. Wegener, E. Rand-Giovannetti, L. Reider, and K. Frey. 2010. 'Individual and contextual factors that influence multi-morbid older adults' participation in chronic disease self-management (CDSM) programs', <i>Journal of the American Geriatrics Society</i> , 1): S167.                                                                                          | Document type: Conference proceedings |
| 9<br>10<br>11<br>12   | Dattalo, M., E. R. Giovannetti, D. Scharfstein, C. Boulton, S. Wegener, J. L. Wolff, B. Leff, K. D. Frick, L. Reider, K. Frey, G. Noronha, and C. Boyd. 2012. 'Who participates in Chronic Disease Self-management (CDSM) programs? Differences between participants and nonparticipants in a population of multimorbid older adults', <i>Medical Care</i> , 50: 1071-75.                         | Outcome: Preferences not addressed    |
| 13<br>14<br>15<br>16  | Dattalo, M., K. Kennealy, E. Chapman, A. Gilmore-Bykovskiy, J. Loosen, E. Schmitz, M. F. Wyman, N. Rogus-Pulia, N. Werner, A. J. Kind, and B. Bowers. 2016. "'I'm not a textbook patient": How being listened to can affect health care trajectories for older adults with multiple chronic conditions and frequent hospitalizations', <i>Journal of General Internal Medicine</i> , 1): S85-S86. | Document type: Conference proceedings |
| 17<br>18              | Dautzenberg, P. L., P. D. Bezemer, S. A. Duursma, R. Schonwetter, and C. Hooyer. 1994. 'The frequency of "do-not-resuscitate" order in aged in-patients: effect of patient- and non-patient-related factors', <i>Netherlands Journal of Medicine</i> , 44: 78-83.                                                                                                                                 | Outcome: Preferences not addressed    |
| 19<br>20<br>21        | Dautzenberg, P. L., S. A. Duursma, P. D. Bezemer, C. Van Engen, R. S. Schonwetter, and C. Hooyer. 1993. 'Resuscitation decisions on a Dutch geriatric ward', <i>Quarterly Journal of Medicine</i> , 86: 535-42.                                                                                                                                                                                   | Outcome: Preferences not addressed    |
| 22<br>23<br>24<br>25  | Davison, Sara N., Seija K. Kromm, and Gillian R. Currie. 2010. 'Patient and health professional preferences for organ allocation and procurement, end-of-life care and organization of care for patients with chronic kidney disease using a discrete choice experiment', <i>Nephrology Dialysis Transplantation</i> , 25: 2334-41.                                                               | Population: Age <60 yrs.              |
| 26<br>27<br>28<br>29  | De Celis, E. S. P., E. Baltazar-Avalos, L. A. Guadalupe Rocha-Rojo, P. Rojo-Castillo, and Y. C. Guerra. 2016. 'Health information seeking preferences of Mexican cancer survivors: Creating an evidence base for the design of high-quality communication programs', <i>Journal of Clinical Oncology</i> . Conference: ASCO's Quality Care Symposium, 34.                                         | Document type: Conference proceedings |
| 30<br>31<br>32        | de Decker, L., C. Annweiler, C. Launay, B. Fantino, and O. Beauchet. 2014. 'Do not resuscitate orders and aging: impact of multimorbidity on the decision-making process', <i>Journal of Nutrition, Health &amp; Aging</i> , 18: 330-5.                                                                                                                                                           | Document type: Editorials & reviews   |
| 33<br>34              | de Vos, R., R. W. Koster, and R. J. de Haan. 1998. 'Impact of survival probability, life expectancy, quality of life and patient preferences on do-not-attempt-resuscitation orders in a hospital. Resuscitation Committee', <i>Resuscitation</i> , 39: 15-21.                                                                                                                                    | Population: Age <60 yrs.              |
| 35<br>36<br>37        | De Vos, R., W. Koster R, and R. J. De Haan. 1998. 'Impact of survival probability, life expectancy, quality of life and patient preferences on do-not-attempt-resuscitation orders in a hospital', <i>Resuscitation</i> , 39: 15-21.                                                                                                                                                              | Duplicates                            |
| 38<br>39<br>40        | Degner, L. F., and J. A. Sloan. 1992. 'DECISION-MAKING DURING SERIOUS ILLNESS - WHAT ROLE DO PATIENTS REALLY WANT TO PLAY', <i>Journal of Clinical Epidemiology</i> , 45: 941-50.                                                                                                                                                                                                                 | Population: Age <60 yrs.              |

|                                 |                                                                                                                                                                                                                                                                                                                                                                                                                                         |                                                    |
|---------------------------------|-----------------------------------------------------------------------------------------------------------------------------------------------------------------------------------------------------------------------------------------------------------------------------------------------------------------------------------------------------------------------------------------------------------------------------------------|----------------------------------------------------|
| 1<br>2<br>3<br>4<br>5<br>6<br>7 | Desbiens, N. A., A. W. Wu, S. K. Broste, N. S. Wenger, A. F. Connors, Jr., J. Lynn, Y. Yasui, R. S. Phillips, and W. Fulkerson. 1996. 'Pain and satisfaction with pain control in seriously ill hospitalized adults: findings from the SUPPORT research investigations. For the SUPPORT investigators. Study to Understand Prognoses and Preferences for Outcomes and Risks of Treatment', <i>Critical Care Medicine</i> , 24: 1953-61. | Outcome: Preferences not addressed                 |
| 8<br>9                          | Deschler, B., T. de Witte, R. Mertelsmann, and M. Lubbert. 2006. 'Treatment decision-making for older patients with high-risk myelodysplastic syndrome or acute myeloid leukemia: problems and approaches', <i>Haematologica</i> , 91: 1513-22.                                                                                                                                                                                         | Outcome: Preferences from physicians or caregivers |
| 10<br>11<br>12                  | Dev, S., R. M. Clare, G. M. Felker, M. Fiuzat, L. Warner Stevenson, and C. M. O'Connor. 2012. 'Link between decisions regarding resuscitation and preferences for quality over length of life with heart failure', <i>European Journal of Heart Failure</i> , 14: 45-53.                                                                                                                                                                | Population: Age <60 yrs.                           |
| 13<br>14                        | Dierckx, K., M. Deveugele, P. Roosen, and I. Devisch. 2013. 'Implementation of shared decision making in physical therapy: observed level of involvement and patient preference', <i>Phys Ther</i> , 93: 1321-30.                                                                                                                                                                                                                       | Population: Age <60 yrs.                           |
| 15<br>16<br>17                  | Dima, A., G. T. Lewith, P. Little, R. Moss-Morris, N. E. Foster, and F. L. Bishop. 2013. 'Identifying patients' beliefs about treatments for chronic low back pain in primary care: a focus group study', <i>British Journal of General Practice</i> , 63: e490-8.                                                                                                                                                                      | Population: Not multimorbid                        |
| 18<br>19<br>20                  | Dinsmore, J., C. Hannigan, E. Murphy, J. Kuiper, A. Jacobs, S. Smith, and J. Doyle. 2017. 'The impact of carer 'shared (disease management) responsibility' on 'shared decision making' for older persons managing multimorbidity', <i>European Journal of Neurology</i> , 24 (Supplement 1): 763.                                                                                                                                      | Document type: Conference proceedings              |
| 21<br>22<br>23                  | Ditto, Peter H., Jill A. Jacobson, William D. Smucker, Joseph H. Danks, and Angela Fagerlin. 2006. 'Context changes choices: A prospective study of the effects of hospitalization on life-sustaining treatment preferences', <i>Medical Decision Making</i> , 26: 313-22.                                                                                                                                                              | Population: Not multimorbid                        |
| 24<br>25                        | Donyai, P., R. Snell, and T. Langran. 2017. 'An evaluation of patient satisfaction with a polypharmacy medication review service conducted by pharmacists in GP practices', <i>International Journal of Pharmacy Practice</i> , 25 (Supplement 1): 45.                                                                                                                                                                                  | Document type: Conference proceedings              |
| 26<br>27<br>28                  | Downar, J., T. Luk, R. W. Sibbald, T. Santini, J. Mikhael, H. Berman, and L. Hawryluck. 2011. 'Why do patients agree to a "Do not resuscitate" or "Full code" order? Perspectives of medical inpatients', <i>Journal of General Internal Medicine</i> , 26: 582-7.                                                                                                                                                                      | Population: Not multimorbid                        |
| 29<br>30<br>31                  | Drks, and Familien-und Präventivmedizin Paracelsus Medizinische Privatuniversität Institut für Allgemein. 2017. "Pilot-testing of a simple Prioritization-table for managing polypharmacy in Primary Care Patients." In.                                                                                                                                                                                                                | Outcome: Preferences not addressed                 |
| 32<br>33                        | Drks, and Rehabilitationsforschung Sektion Versorgungsforschung und. 2018. "Availability and Quality of Assessment Instruments on Patient-Centeredness in the Multimorbid Elderly." In.                                                                                                                                                                                                                                                 | Outcome: Preferences not addressed                 |
| 34<br>35<br>36                  | Ekdahl, A. W., I. Hellstrom, L. Andersson, and M. Friedrichsen. 2012. 'Too complex and time-consuming to fit in! Physicians' experiences of elderly patients and their participation in medical decision making: a grounded theory study', <i>BMJ Open</i> , 2: 7.                                                                                                                                                                      | Outcome: Preferences from physicians or caregivers |
| 37<br>38<br>39                  | Ekerstad, N., R. Lofmark, D. Andersson, and P. Carlsson. 2011. 'A tentative consensus-based model for priority setting: an example from elderly patients with myocardial infarction and multi-morbidity', <i>Scandinavian journal of public health</i> , 39: 345-53.                                                                                                                                                                    | Outcome: Preferences from physicians or caregivers |

40  
41  
42  
43  
44  
45  
46

|                                                                                                                                                                                                                                                                                                                                                                               |                                    |
|-------------------------------------------------------------------------------------------------------------------------------------------------------------------------------------------------------------------------------------------------------------------------------------------------------------------------------------------------------------------------------|------------------------------------|
| Ernst, J., S. Berger, G. Weißflog, C. Schröder, A. Körner, D. Niederwieser, E. Brähler, and S. Singer. 2013. 'Patient participation in the medical decision-making process in haemato-oncology—A qualitative study', <i>European Journal of Cancer Care</i> , 22: 684-90.                                                                                                     | Population: Age <60 yrs.           |
| Evans, K. E., T. Kalsi, G. Babic-Illman, and D. Harari. 2014. 'Comorbidities and patient choice are poorly documented in older people undergoing treatment for cancer', <i>European Geriatric Medicine</i> , 1(1): S143.                                                                                                                                                      | Outcome: Preferences not addressed |
| Falun, N., B. Fridlund, M. A. Schaufel, E. Schei, and T. M. Norekval. 2016. 'Patients' goals, resources, and barriers to future change: A qualitative study of patient reflections at hospital discharge after myocardial infarction', <i>European Journal of Cardiovascular Nursing</i> , 15: 495-503.                                                                       | Population: Not multimorbid        |
| Farin, E., L. Gramm, and E. Schmidt. 2013. 'The patient-physician relationship in patients with chronic low back pain as a predictor of outcomes after rehabilitation', <i>Journal of Behavioral Medicine</i> , 36: 246-58.                                                                                                                                                   | Population: Age <60 yrs.           |
| Farin, E., L. Gramm, and E. Schmidt. 2013. 'The patient-physician relationship in patients with chronic low back pain as a predictor of outcomes after rehabilitation', <i>Journal of Behavioral Medicine</i> , 36: 246-58.                                                                                                                                                   | Outcome: Preferences not addressed |
| Fausser, Michael C. 1999. 'Hospice patient perspectives regarding the implementation of advanced directives', 60: 0410-10.                                                                                                                                                                                                                                                    | Outcome: Preferences not addressed |
| Federman, A. D., A. Sanchez-Munoz, L. Jandorf, C. Salmon, M. S. Wolf, and J. Kannry. 2017. 'Patient and clinician perspectives on the outpatient after-visit summary: a qualitative study to inform improvements in visit summary design', <i>Journal of the American Medical Informatics Association : JAMIA</i> , 24: e61-e68.                                              | Population: Not multimorbid        |
| Fernstrom, K. M., N. D. Shippee, A. L. Jones, and H. R. Britt. 2016. 'Development and validation of a new patient experience tool in patients with serious illness', <i>BMC Palliative Care</i> , 15: 99.                                                                                                                                                                     | Outcome: Preferences not addressed |
| Ferris, R., C. Blaum, E. Kiwak, J. Austin, J. Esterson, G. Harkless, G. Oftedahl, M. Parchman, P. H. Van Ness, and M. E. Tinetti. 2017. 'Perspectives of Patients, Clinicians, and Health System Leaders on Changes Needed to Improve the Health Care and Outcomes of Older Adults With Multiple Chronic Conditions', <i>Journal of Aging &amp; Health</i> : 898264317691166. | Outcome: Preferences not addressed |
| Filardo, G., A. Roffi, G. Merli, T. Marcacci, F. B. Ceroni, D. Raboni, E. Kon, and M. Marcacci. 2017. 'Patients control preferences and results in knee arthroplasty', <i>Knee Surgery Sports Traumatology Arthroscopy</i> , 25: 552-58.                                                                                                                                      | Population: Not multimorbid        |
| Finkelstein, E., C. Malhotra, J. Chay, S. Ozdemir, A. Chopra, and R. Kanesvaran. 2016. 'Impact of Treatment Subsidies and Cash Payouts on Treatment Choices at the End of Life', <i>Value in Health</i> , 19: 788-94.                                                                                                                                                         | Population: Age <60 yrs.           |
| Finney Rutten, L. J., B. W. Hesse, J. L. St. Sauver, P. Wilson, N. Chawla, D. B. Hartigan, R. P. Moser, S. Taplin, R. Glasgow, and N. K. Arora. 2016. 'Health Self-Efficacy Among Populations with Multiple Chronic Conditions: the Value of Patient-Centered Communication', <i>Advances in Therapy</i> , 33: 1440-51.                                                       | Outcome: Preferences not addressed |
| Fischer, M., A. Visser, B. Voerman, B. Garssen, G. van Andel, and J. Bensing. 2006. 'Treatment decision making in prostate cancer: Patients' participation in complex decisions', <i>Patient Education and Counseling</i> , 63: 308-13.                                                                                                                                       | Population: Not multimorbid        |

|                                                                                                                                                                                                                                                                         |                                                                                                                                                                                                                                                                                                                                                                                                                                                                                                                                                                                                                                                                                                                                                                                                                                                                                                                                                                                                                                                                                                                                                                                                                                                                                                                                                                                                                                                                                                                                                                                                                                                                                                                                                                                                                                                                                                                                                                                                                                                                                                                                                                                                                                                                                                                                                                                                                                                                                                                                                                                                                                                                                                                                                                                                                                                                                                                                                                                                                                                                                                                                                                                                                                                                                                                                                                                                           |                                                                                                                                                                                                                                                                                                                                                                                                                                                                                                                                                          |
|-------------------------------------------------------------------------------------------------------------------------------------------------------------------------------------------------------------------------------------------------------------------------|-----------------------------------------------------------------------------------------------------------------------------------------------------------------------------------------------------------------------------------------------------------------------------------------------------------------------------------------------------------------------------------------------------------------------------------------------------------------------------------------------------------------------------------------------------------------------------------------------------------------------------------------------------------------------------------------------------------------------------------------------------------------------------------------------------------------------------------------------------------------------------------------------------------------------------------------------------------------------------------------------------------------------------------------------------------------------------------------------------------------------------------------------------------------------------------------------------------------------------------------------------------------------------------------------------------------------------------------------------------------------------------------------------------------------------------------------------------------------------------------------------------------------------------------------------------------------------------------------------------------------------------------------------------------------------------------------------------------------------------------------------------------------------------------------------------------------------------------------------------------------------------------------------------------------------------------------------------------------------------------------------------------------------------------------------------------------------------------------------------------------------------------------------------------------------------------------------------------------------------------------------------------------------------------------------------------------------------------------------------------------------------------------------------------------------------------------------------------------------------------------------------------------------------------------------------------------------------------------------------------------------------------------------------------------------------------------------------------------------------------------------------------------------------------------------------------------------------------------------------------------------------------------------------------------------------------------------------------------------------------------------------------------------------------------------------------------------------------------------------------------------------------------------------------------------------------------------------------------------------------------------------------------------------------------------------------------------------------------------------------------------------------------------------|----------------------------------------------------------------------------------------------------------------------------------------------------------------------------------------------------------------------------------------------------------------------------------------------------------------------------------------------------------------------------------------------------------------------------------------------------------------------------------------------------------------------------------------------------------|
| 1<br>2<br>3<br>4<br>5<br>6<br>7<br>8<br>9<br>10<br>11<br>12<br>13<br>14<br>15<br>16<br>17<br>18<br>19<br>20<br>21<br>22<br>23<br>24<br>25<br>26<br>27<br>28<br>29<br>30<br>31<br>32<br>33<br>34<br>35<br>36<br>37<br>38<br>39<br>40<br>41<br>42<br>43<br>44<br>45<br>46 | <p>Fitch, M. 2017. 'Perspectives of older adults regarding decision-making about chemotherapy', <i>Psycho-Oncology</i>, 26 (Supplement 3): 102.</p> <p>Florin, Jan, Anna Ehrenberg, and Margareta Ehnfors. 2006. 'Patient participation in clinical decision-making in nursing: A comparative study of nurses' and patients' perceptions', <i>Journal of Clinical Nursing</i>, 15: 1498-508.</p> <p>Florin, Jan, Anna Ehrenberg, and Margareta Ehnfors. 2006. 'Patient participation in clinical decision-making in nursing: A comparative study of nurses' and patients' perceptions', <i>Journal of Clinical Nursing</i>, 15: 1498-508.</p> <p>Fortin, M., C. Hudon, F. Gallagher, A. L. Ntetu, D. Maltais, and H. Soubhi. 2010. 'Nurses joining family doctors in primary care practices: perceptions of patients with multimorbidity', <i>BMC Family Practice</i>, 11: 84.</p> <p>Fradgley, E. A., C. L. Paul, J. Bryant, I. A. Roos, F. A. Henskens, and D. J. Paul. 2014. 'Consumer participation in quality improvements for chronic disease care: development and evaluation of an interactive patient-centered survey to identify preferred service initiatives', <i>Journal of medical Internet research</i>, 16: e292.</p> <p>Fraenkel, L., D. R. Wittink, J. Concato, and T. Fried. 2004. 'Are preferences for cyclooxygenase-2 inhibitors influenced by the certainty effect?', <i>Journal of Rheumatology</i>, 31: 591-93.</p> <p>Fraenkel, L., S. T. Bogardus, J. Concato, and D. R. Wittink. 2004. 'Treatment options in knee osteoarthritis - The patient's perspective', <i>Archives of Internal Medicine</i>, 164: 1299-304.</p> <p>Fraenkel, Liana, Barbara Gulanski, and Dick R. Wittink. 2006. 'Preference for hip protectors among older adults at high risk for osteoporotic fractures', <i>Journal of Rheumatology</i>, 33: 2064-68.</p> <p>Franco, M. R., K. Howard, C. Sherrington, P. H. Ferreira, J. Rose, J. L. Gomes, and M. L. Ferreira. 2015. 'Eliciting older people's preferences for exercise programs: a best-worst scaling choice experiment', <i>Journal of Physiotherapy</i>, 61: 34-41.</p> <p>Fried, T. R., M. E. Tinetti, and L. Iannone. 2011. 'Primary care clinicians' experiences with treatment decision making for older persons with multiple conditions', <i>Archives of Internal Medicine</i>, 171: 75-80.</p> <p>Frost, D. W., D. J. Cook, D. K. Heyland, and R. A. Fowler. 2011. 'Patient and healthcare professional factors influencing end-of-life decision-making during critical illness: A systematic review', <i>Critical Care Medicine</i>, 39: 1174-89.</p> <p>Fuller, L. M., B. Button, B. Tarrant, C. R. Battistuzzo, M. Braithwaite, G. Snell, and A. E. Holland. 2014. 'Patients' expectations and experiences of rehabilitation following lung transplantation', <i>Clinical Transplantation</i>, 28: 252-8.</p> <p>Fuller, R., N. Dudley, and J. Blacktop. 2004. 'Avoidance hierarchies and preferences for anticoagulation-semi-qualitative analysis of older patients' views about stroke prevention and the use of warfarin', <i>Age and Ageing</i>, 33: 608-11.</p> <p>Fuller, S. M., K. A. Koester, R. R. Guinness, and W. T. Steward. 2017. 'Patients' Perceptions and Experiences of Shared Decision-Making in Primary HIV Care Clinics', <i>The Journal of the Association of Nurses in AIDS Care: JANAC</i>, 28: 75-84.</p> | <p>Document type: Conference proceedings</p> <p>Population: Age &lt;60 yrs.</p> <p>Population: Not multimorbid</p> <p>Outcome: Preferences not addressed</p> <p>Population: Age &lt;60 yrs.</p> <p>Population: Not multimorbid</p> <p>Population: Not multimorbid</p> <p>Population: Not multimorbid</p> <p>Population: Not multimorbid</p> <p>Outcome: Preferences from physicians or caregivers</p> <p>Outcome: Preferences not addressed</p> <p>Population: Age &lt;60 yrs.</p> <p>Population: Not multimorbid</p> <p>Population: Age &lt;60 yrs.</p> |
|-------------------------------------------------------------------------------------------------------------------------------------------------------------------------------------------------------------------------------------------------------------------------|-----------------------------------------------------------------------------------------------------------------------------------------------------------------------------------------------------------------------------------------------------------------------------------------------------------------------------------------------------------------------------------------------------------------------------------------------------------------------------------------------------------------------------------------------------------------------------------------------------------------------------------------------------------------------------------------------------------------------------------------------------------------------------------------------------------------------------------------------------------------------------------------------------------------------------------------------------------------------------------------------------------------------------------------------------------------------------------------------------------------------------------------------------------------------------------------------------------------------------------------------------------------------------------------------------------------------------------------------------------------------------------------------------------------------------------------------------------------------------------------------------------------------------------------------------------------------------------------------------------------------------------------------------------------------------------------------------------------------------------------------------------------------------------------------------------------------------------------------------------------------------------------------------------------------------------------------------------------------------------------------------------------------------------------------------------------------------------------------------------------------------------------------------------------------------------------------------------------------------------------------------------------------------------------------------------------------------------------------------------------------------------------------------------------------------------------------------------------------------------------------------------------------------------------------------------------------------------------------------------------------------------------------------------------------------------------------------------------------------------------------------------------------------------------------------------------------------------------------------------------------------------------------------------------------------------------------------------------------------------------------------------------------------------------------------------------------------------------------------------------------------------------------------------------------------------------------------------------------------------------------------------------------------------------------------------------------------------------------------------------------------------------------------------|----------------------------------------------------------------------------------------------------------------------------------------------------------------------------------------------------------------------------------------------------------------------------------------------------------------------------------------------------------------------------------------------------------------------------------------------------------------------------------------------------------------------------------------------------------|

|                       |                                                                                                                                                                                                                                                                                                                                       |                                       |
|-----------------------|---------------------------------------------------------------------------------------------------------------------------------------------------------------------------------------------------------------------------------------------------------------------------------------------------------------------------------------|---------------------------------------|
| 1<br>2<br>3<br>4<br>5 | Fung, C. H., C. M. Setodji, F. Y. Kung, J. Keeseey, S. M. Asch, J. Adams, and E. A. McGlynn. 2008. 'The relationship between multimorbidity and patients' ratings of communication', <i>J Gen Intern Med</i> , 23: 788-93.                                                                                                            | Population: Age <60 yrs.              |
| 6<br>7                | Furber, L., S. Bonas, G. Murtagh, and A. Thomas. 2015. 'Patients' experiences of an initial consultation in oncology: knowing and not knowing', <i>British journal of health psychology</i> , 20: 261-73.                                                                                                                             | Population: Age <60 yrs.              |
| 8<br>9<br>10          | Gainer, R. A., J. Curran, K. J. Buth, J. G. David, J. F. Legare, and G. M. Hirsch. 2017. 'Toward Optimal Decision Making among Vulnerable Patients Referred for Cardiac Surgery: A Qualitative Analysis of Patient and Provider Perspectives', <i>Medical Decision Making</i> , 37: 600-10.                                           | Population: Not multimorbid           |
| 11<br>12<br>13<br>14  | Gainer, R., J. Begum, E. Wilson-Pease, and G. Hirsch. 2016. 'A formalized shared decision making process with individualized decision aids improves comprehension and decisional quality among frail, elderly cardiac surgery patients', <i>Canadian Journal of Cardiology</i> , 32 (10 Supplement 1): S266-S267.                     | Population: Age <60 yrs.              |
| 15<br>16              | Gallacher, K., C. R. May, V. M. Montori, and F. S. Mair. 2011. 'Understanding patients' experiences of treatment burden in chronic heart failure using normalization process theory', <i>Ann Fam Med</i> , 9: 235-43.                                                                                                                 | Outcome: Preferences not addressed    |
| 17<br>18<br>19<br>20  | Gallagher, J. J., C. C. Lewis, A. Ruane, R. Buckmaster, F. Doyle, S. Sears, T. Morgan, N. Pender, R. G. Sheahan, and B. McAdam. 2015. 'Targeting device acceptance in patients with an ICD: The role of insomnia, PTSD and patients' support preferences', <i>European Journal of Heart Failure</i> , 1): 428.                        | Document type: Conference proceedings |
| 21<br>22              | Garrett, J. M., R. P. Harris, J. K. Norburn, D. L. Patrick, and M. Danis. 1993. 'LIFE-SUSTAINING TREATMENTS DURING TERMINAL ILLNESS - WHO WANTS WHAT', <i>Journal of General Internal Medicine</i> , 8: 361-68.                                                                                                                       | Population: Not multimorbid           |
| 23<br>24<br>25        | Garrido, M. M., S. T. Harrington, and H. G. Prigerson. 2014. 'End-of-Life Treatment Preferences: A Key to Reducing Ethnic/Racial Disparities in Advance Care Planning?', <i>Cancer</i> , 120: 3981-86.                                                                                                                                | Population: Age <60 yrs.              |
| 26<br>27<br>28        | Gazzard, B., S. Ali, A. Muhlbacher, N. Ghafouri, F. Maggiolo, C. Golics, S. Nozza, M. J. Fuster, A. Antela, J. J. Parienti, N. Dang, S. R. Bregigeon, A. Benzie, and M. Murray. 2014. 'Patient preferences for characteristics of antiretroviral therapies: results from five European countries', <i>J Int AIDS Soc</i> , 17: 19540. | Population: Age <60 yrs.              |
| 29<br>30<br>31<br>32  | Geok Ling, Lee, Teo Irene, and Ravindran Kanesvaran. 2018. 'The Complexities of Doctor-Patient-Family Communication in an Asian Oncology Setting: Concordance and Discordance Among Patient Preferences, Family Preferences, and Perceived and Actual Communication', <i>Health Communication</i> , 33: 95-101.                       | Population: Not multimorbid           |
| 33<br>34              | Gill, S. D., T. Dunning, F. McKinnon, D. Cook, and J. Bourke. 2014. 'Understanding the experience of inpatient rehabilitation: insights into patient-centred care from patients and family members', <i>Scandinavian Journal of Caring Sciences</i> , 28: 264-72.                                                                     | Outcome: Preferences not addressed    |
| 35<br>36<br>37        | Gillick, M., S. Berkman, and L. Cullen. 1999. 'A patient-centered approach to advance medical planning in the nursing home', <i>Journal of the American Geriatrics Society</i> , 47: 227-30.                                                                                                                                          | Population: Not multimorbid           |
| 38<br>39<br>40        | Gjerset, G. M., S. D. Fossa, K. S. Courneya, E. Skovlund, A. B. Jacobsen, and L. Thorsen. 2011. 'Interest and preferences for exercise counselling and programming among Norwegian cancer survivors', <i>European Journal of Cancer Care</i> , 20: 96-105.                                                                            | Population: Age <60 yrs.              |

1  
2  
3  
4  
5  
6  
7  
8  
9  
10  
11  
12  
13  
14  
15  
16  
17  
18  
19  
20  
21  
22  
23  
24  
25  
26  
27  
28  
29  
30  
31  
32  
33  
34  
35  
36  
37  
38  
39  
40  
41  
42  
43  
44  
45  
46

|                       |                                                                                                                                                                                                                                                                                                                  |                                                    |
|-----------------------|------------------------------------------------------------------------------------------------------------------------------------------------------------------------------------------------------------------------------------------------------------------------------------------------------------------|----------------------------------------------------|
| 1<br>2<br>3<br>4<br>5 | Glynn, L. G., A. MacFarlane, and A. W. Murphy. 2007. 'The complexity of patients' satisfaction with out-of-hours care: a qualitative study', <i>European Journal of General Practice</i> , 13: 83-8.                                                                                                             | Population: Age <60 yrs.                           |
| 6<br>7                | Gordon, E. J. 2001. 'Patients' decisions for treatment of end-stage renal disease and their implications for access to transplantation', <i>Social Science &amp; Medicine</i> , 53: 971-87.                                                                                                                      | Population: Age <60 yrs.                           |
| 8<br>9<br>10          | Gordon, Janet, Kenneth Rockwood, and Colin Powell. 2000. 'Assessing patients' views of clinical changes', <i>JAMA: Journal of the American Medical Association</i> , 283: 1824-25.                                                                                                                               | Document type: Editorials & reviews                |
| 11<br>12<br>13        | Grace, S. L., J. McDonald, D. Fishman, and V. Caruso. 2005. 'Patient preferences for home-based versus hospital-based cardiac rehabilitation', <i>Journal of Cardiopulmonary Rehabilitation</i> , 25: 24-29.                                                                                                     | Population: Not multimorbid                        |
| 14<br>15              | Granas, A. G., and I. Bates. 2005. 'Patients' understanding and management of their illnesses and prescribed medicines--a descriptive study', <i>Pharmacy World &amp; Science</i> , 27: 321-8.                                                                                                                   | Outcome: Preferences not addressed                 |
| 16<br>17<br>18        | Greenhalgh, T., J. Wherton, P. Sugarhood, S. Hinder, R. Procter, and R. Stones. 2013. 'What matters to older people with assisted living needs? A phenomenological analysis of the use and non-use of telehealth and telecare', <i>Social Science &amp; Medicine</i> , 93: 86-94.                                | Outcome: Preferences not addressed                 |
| 19<br>20<br>21        | Grudniewicz, A., M. Nelson, K. Kuluski, V. Lui, H. V. Cunningham, J. X. Nie, H. Colquhoun, W. P. Wodchis, S. Taylor, M. Loganathan, and R. E. Upshur. 2016. 'Treatment goal setting for complex patients: Protocol for a scoping review', <i>BMJ Open</i> , 6 (5) (no pagination).                               | Document type: Study protocols                     |
| 22<br>23<br>24        | Grudzen, C., S. Stone, S. Mohanty, K. A. Lorenz, J. Torres, J. Ortiz, and S. Timmermans. 2011. '"I want to be taking my own last breath": Patients' reflections on illness when presenting to an emergency department at the end of life (723)', <i>Journal of Pain and Symptom Management</i> , 41 (1): 285-86. | Document type: Conference proceedings              |
| 25<br>26<br>27        | Grundberg, A., B. Ebbeskog, S. A. Gustafsson, and D. Religa. 2014. 'Mental health-promoting dialogues from the perspective of community-dwelling seniors with multimorbidity', <i>J Multidisc Healthc</i> , 7: 189-99.                                                                                           | Outcome: Preferences not addressed                 |
| 28<br>29              | Gunturi, N. 2018. 'Patient-centered goals of care: Using the Chronic Care Management (CCM) code towards cooperative goal setting in the multimorbid elderly', <i>Journal of the American Medical Directors Association</i> , 19 (3): B20.                                                                        | Document type: Conference proceedings              |
| 30<br>31<br>32        | Hackshaw, M. D., M. Holmes, M. Lankford, M. Thomas, A. Ogbonnaya, and M. Eaddy. 2016. 'Prescribing Preferences in the First-Line Treatment for Patients With Metastatic Renal Cell Carcinoma in the United States', <i>Clinical Genitourinary Cancer</i> , 14: e479-e87.                                         | Outcome: Preferences from physicians or caregivers |
| 33<br>34              | Hall, A. M., P. H. Ferreira, C. G. Maher, J. Latimer, and M. L. Ferreira. 2010. 'The influence of the therapist-patient relationship on treatment outcome in physical rehabilitation: a systematic review', <i>Physical Therapy</i> , 90: 1099-110.                                                              | Population: Age <60 yrs.                           |
| 35<br>36<br>37<br>38  | Hamann, J., B. Neuner, J. Kasper, A. Vodermaier, A. Loh, A. Deinzer, C. Heesen, W. Kissling, R. Busch, R. Schmieder, C. Spies, C. Caspari, and M. Harter. 2007. 'Participation preferences of patients with acute and chronic conditions', <i>Health Expectations</i> , 10: 358-63.                              | Population: Age <60 yrs.                           |

|                            |                                                                                                                                                                                                                                                                                                                                              |                                       |
|----------------------------|----------------------------------------------------------------------------------------------------------------------------------------------------------------------------------------------------------------------------------------------------------------------------------------------------------------------------------------------|---------------------------------------|
| 1<br>2<br>3<br>4<br>5<br>6 | Hamel, M. B., J. Lynn, J. M. Teno, K. E. Covinsky, A. W. Wu, A. Galanos, N. A. Desbiens, and R. S. Phillips. 2000. 'Age-related differences in care preferences, treatment decisions, and clinical outcomes of seriously ill hospitalized adults: Lessons from SUPPORT', <i>Journal of the American Geriatrics Society</i> , 48: S176-S82.   | Document type: Conference proceedings |
| 7<br>8<br>9                | Hamelinck, V. C., E. Bastiaannet, A. H. Pieterse, C. J. H. van de Velde, G. J. Liefers, and A. M. Stiggelbout. 2018. 'Preferred and Perceived Participation of Younger and Older Patients in Decision Making About Treatment for Early Breast Cancer: A Prospective Study', <i>Clin Breast Cancer</i> , 18: e245-e53.                        | Population: Not multimorbid           |
| 10<br>11<br>12             | Harder, H., R. Ballinger, C. Langridge, A. Ring, and L. J. Fallowfield. 2013. 'Adjuvant chemotherapy in elderly women with breast cancer: patients' perspectives on information giving and decision making', <i>Psycho-Oncology</i> , 22: 2729-35.                                                                                           | Population: Not multimorbid           |
| 13<br>14<br>15             | Hauber, A. B., H. Nguyen, J. Posner, I. Kalsekar, and J. Ruggles. 2016. 'A discrete-choice experiment to quantify patient preferences for frequency of glucagon-like peptide-1 receptor agonist injections in the treatment of type 2 diabetes', <i>Current Medical Research &amp; Opinion</i> , 32: 251-62.                                 | Population: Not multimorbid           |
| 16<br>17<br>18             | Hawkins, M., S. D. Gill, R. Batterham, G. R. Elsworth, and R. H. Osborne. 2017. 'The Health Literacy Questionnaire (HLQ) at the patient-clinician interface: a qualitative study of what patients and clinicians mean by their HLQ scores', <i>BMC Health Services Research</i> , 17: 309.                                                   | Population: Age <60 yrs.              |
| 19<br>20<br>21             | Hawkins, N. A., P. H. Ditto, J. H. Danks, and W. D. Smucker. 2005. 'Micromanaging death: Process preferences, values, and goals in end-of-life medical decision making', <i>Gerontologist</i> , 45: 107-17.                                                                                                                                  | Population: Not multimorbid           |
| 22<br>23<br>24             | Hawley, S. T., and R. Morrison. 2012. 'Achieving high-quality surgical treatment decisions: The perspective of older breast cancer patients', <i>Aging Health</i> , 8: 589-99.                                                                                                                                                               | Outcome: Preferences not addressed    |
| 25<br>26                   | Hayes, R. P., and J. T. Fitzgerald. 2009. 'Perceptions and attitudes are primary contributors to insulin delivery system satisfaction in people with type 2 diabetes', <i>Diabetes Technology and Therapeutics</i> , 11: 419-26.                                                                                                             | Population: Age <60 yrs.              |
| 27<br>28<br>29             | Hedman M., U. Pöder, A.G. Mamhidir A.G., A. Nilsson, M.L. Kristofferzon and E. Häggström. Life memories and the ability to act: the meaning of autonomy and participation for older people when living with chronic illness. <i>Scand J Caring Sci</i> ; 2015; 29; 824–833                                                                   | Population: Not multimorbid           |
| 30<br>31<br>32             | Heid, A. R., R. Pruchno, and M. Wilson-Genderson. 2018. 'Illness Representations of Multiple Chronic Conditions and Self-Management Behaviors in Older Adults: A Pilot Study', <i>International Journal of Aging &amp; Human Development</i> , 87: 90-106.                                                                                   | Outcome: Preferences not addressed    |
| 33<br>34                   | Heisler, M. 2017. 'Eliciting Personal Values of Patients with Multiple Chronic Conditions: Why and How', <i>Journal of General Internal Medicine</i> , 32: 1273-74.                                                                                                                                                                          | Document type: Editorials & reviews   |
| 35<br>36<br>37<br>38       | Herber, Oliver Rudolf, Bettina Bucker, Maria-Inti Metzendorf, and Julie Barroso. 2017. 'A qualitative meta-summary using Sandelowski and Barroso's method for integrating qualitative research to explore barriers and facilitators to self-care in heart failure patients', <i>European Journal of Cardiovascular Nursing</i> , 16: 662-77. | Document type: Editorials & reviews   |



|                       |                                                                                                                                                                                                                                                                                                                                                                                                                                                               |                                     |
|-----------------------|---------------------------------------------------------------------------------------------------------------------------------------------------------------------------------------------------------------------------------------------------------------------------------------------------------------------------------------------------------------------------------------------------------------------------------------------------------------|-------------------------------------|
| 1<br>2<br>3<br>4<br>5 | Hershkovitz, A., B. M. Rothschild, J. H. Rose, T. Hornick, and E. E. O'Toole. 2001. 'Medical care perceptions in elderly patients with musculoskeletal complaints', <i>Israel Medical Association Journal</i> , 3: 822-27.                                                                                                                                                                                                                                    | Outcome: Preferences not addressed  |
| 6<br>7                | Hjelm, M., G. Holst, A. Willman, D. Bohman, and J. Kristensson. 2015. 'The work of case managers as experienced by older persons (75+) with multi-morbidity - a focused ethnography', <i>BMC Geriatrics</i> , 15: 168.                                                                                                                                                                                                                                        | Outcome: Preferences not addressed  |
| 8<br>9<br>10          | Hofman, C. S., P. Makai, H. Boter, B. M. Buurman, A. J. de Craen, M. G. M. Rikkert, R. Donders, and R. J. F. Melis. 2015. 'The influence of age on health valuations: the older olds prefer functional independence while the younger olds prefer less morbidity', <i>Clinical Interventions In Aging</i> , 10: 9.                                                                                                                                            | Population: Not multimorbid         |
| 11<br>12<br>13<br>14  | Hogden, A., D. Greenfield, P. Nugus, and M. C. Kiernan. 2015. 'Development of a model to guide decision making in amyotrophic lateral sclerosis multidisciplinary care', <i>Health expectations: an international journal of public participation in health care and health policy</i> , 18: 1769-82.                                                                                                                                                         | Population: Not multimorbid         |
| 15<br>16              | Holmes, E., P. Crome, and A. Arora. 2018. 'Patients' preferences and existential perspective: what to consider and how should patient's expectations be guided?', <i>Aging Clinical and Experimental Research</i> , 30: 271-75.                                                                                                                                                                                                                               | Document type: Editorials & reviews |
| 17<br>18              | Holmes, H. M., and A. Todd. 2017. 'The Role of Patient Preferences in Deprescribing', <i>Clinics in Geriatric Medicine</i> , 33: 165-75.                                                                                                                                                                                                                                                                                                                      | Document type: Editorials & reviews |
| 19<br>20              | Hope, K., M. Ferguson, D. P. Reidlinger, and E. Agarwal. 2017. "'I don't eat when I'm sick": Older people's food and mealtime experiences in hospital', <i>Maturitas</i> , 97: 6-13.                                                                                                                                                                                                                                                                          | Population: Not multimorbid         |
| 21<br>22<br>23        | Hopp, F. P., N. Thornton, L. Martin, and R. Zalenski. 2012. 'Life disruption, life continuation: contrasting themes in the lives of African-American elders with advanced heart failure', <i>Soc Work Health Care</i> , 51: 149-72.                                                                                                                                                                                                                           | Outcome: Preferences not addressed  |
| 24<br>25<br>26        | Hopton, A., J. Eldred, and H. MacPherson. 2014. 'Patients' experiences of acupuncture and counselling for depression and comorbid pain: a qualitative study nested within a randomised controlled trial', <i>BMJ Open</i> , 4: e005144.                                                                                                                                                                                                                       | Population: Age <60 yrs.            |
| 27<br>28<br>29<br>30  | Hsu, Tina, Matthew Loscalzo, Rupal Ramani, Stephen Forman, Leslie Popplewell, Karen Clark, Vani Katheria, R. E. X. Strowbridge, Redmond Rinehart, D. A. N. Smith, Keith Matthews, Jeff Dillehunt, Feng Tao, David Smith, Canlan Sun, and Arti Hurria. 2017. 'Are Disagreements in Caregiver and Patient Assessment of Patient Health Associated with Increased Caregiver Burden in Caregivers of Older Adults with Cancer?', <i>Oncologist</i> , 22: 1383-91. | Outcome: Preferences not addressed  |
| 31<br>32              | Huang, S. H. 2013. 'Challenges in managing elderly cancer patients: A systematic review', <i>Journal of Medical Imaging and Radiation Sciences</i> , 44 (1): 50.                                                                                                                                                                                                                                                                                              | Outcome: Preferences not addressed  |
| 33<br>34<br>35        | Hullfish, K. L., V. E. Bovbjerg, and W. D. Steers. 2004. 'Patient-centered goals for pelvic floor dysfunction surgery: Long-term follow-up', <i>American Journal of Obstetrics and Gynecology</i> , 191: 201-05.                                                                                                                                                                                                                                              | Population: Not multimorbid         |
| 36<br>37<br>38        | Hurwitz, L. M., J. Cullen, S. Elsamanoudi, D. J. Kim, J. Hudak, M. Colston, J. Travis, H. C. Kuo, C. R. Porter, and I. L. Rosner. 2016. 'A prospective cohort study of treatment decision-making for prostate cancer following participation in a multidisciplinary clinic', <i>Urologic Oncology</i> , 34: 233.e17-25.                                                                                                                                       | Population: Not multimorbid         |

|                                                          |                                                                                                                                                                                                                                                                                                                        |                                                    |
|----------------------------------------------------------|------------------------------------------------------------------------------------------------------------------------------------------------------------------------------------------------------------------------------------------------------------------------------------------------------------------------|----------------------------------------------------|
| 1<br>2<br>3<br>4<br>5                                    | Husain, L. S., K. Collins, M. Reed, and L. Wyld. 2008. 'Choices in cancer treatment: a qualitative study of the older women's (>70 years) perspective', <i>Psycho-Oncology</i> , 17: 410-6.                                                                                                                            | Population: Not multimorbid                        |
| 6<br>7<br>8                                              | Ickowicz, E. 2012. 'Patient-centered care for older adults with multiple chronic conditions: A stepwise approach from the American Geriatrics Society: American Geriatrics Society expert panel on the care of older adults with multimorbidity', <i>Journal of the American Geriatrics Society</i> , 60: 1957-68.     | Document type: Editorials & reviews                |
| 9<br>10<br>11                                            | Isaacs, C. G., C. Kistler, K. M. Hunold, G. F. Pereira, M. Buchbinder, M. A. Weaver, S. A. McLean, and T. F. Platts-Mills. 2013. 'Shared decision-making in the selection of outpatient analgesics for older individuals in the emergency department', <i>Journal of the American Geriatrics Society</i> , 61: 793-98. | Outcome: Preferences not addressed                 |
| 12<br>13<br>14                                           | Isacson, D., K. Bingefors, and M. Lindberg. 2004. 'Self-reported Dermatological Problems and Preferences for Health: An Epidemiological Survey', <i>Acta Dermato-Venereologica</i> , 84: 27-31.                                                                                                                        | Population: Age <60 yrs.                           |
| 15<br>16<br>17                                           | Itaya, T., Y. Murakami, A. Ota, E. Nomura, T. Fukushima, and M. Nishigaki. 2018. 'Factors influencing home discharge preference of inpatients with acute cerebral infarction: A retrospective cohort study', <i>Stroke. Conference: American Heart Association/American Stroke Association</i> , 49.                   | Document type: Conference proceedings              |
| 18<br>19<br>20                                           | Iturria Sierra, J. A., and S. Marquez Calderon. 1997. '[Health and social services: needs, preferences and their use by the elderly following hospitalization]', <i>Revista Espanola de Salud Publica</i> , 71: 281-91.                                                                                                | Population: Not multimorbid                        |
| 21<br>22                                                 | Jacobson, Kristin K. 2014. 'The older adult's experience of treatment and communication with primary care physicians in the medical encounter', 75.                                                                                                                                                                    | Outcome: Preferences not addressed                 |
| 23<br>24                                                 | Jansen, J., J. van Weert, S. van Dulmen, T. Heeren, and J. Bensing. 2007. 'Patient education about treatment in cancer care: an overview of the literature on older patients' needs', <i>Cancer Nursing</i> , 30: 251-60.                                                                                              | Population: Not multimorbid                        |
| 25<br>26<br>27                                           | Jansons, P. S., L. Robins, T. P. Haines, and L. O'Brien. 2018. 'Barriers and enablers to ongoing exercise for people with chronic health conditions: Participants' perspectives following a randomized controlled trial of two interventions', <i>Archives of Gerontology and Geriatrics</i> , 76: 92-99.              | Outcome: Preferences not addressed                 |
| 28<br>29<br>30                                           | Janssen, D. J. A., J. R. Curtis, D. H. Au, M. A. Spruit, L. Downey, J. M. G. A. Schols, E. F. M. Wouters, and R. A. Engelberg. 2011. 'Patient-clinician communication about end-of-life care for Dutch and US patients with COPD', <i>European Respiratory Journal</i> , 38: 268-76.                                   | Outcome: Preferences not addressed                 |
| 31<br>32<br>33                                           | Janssen, I. M., A. Gerhardus, G. D. von Gersdorff, C. A. Baldamus, M. Schaller, C. Barth, and F. Scheibler. 2015. 'Preferences of patients undergoing hemodialysis - Results from a questionnaire-based study with 4,518 patients', <i>Patient Preference and Adherence</i> , 9: 847-55.                               | Population: Not multimorbid                        |
| 34<br>35<br>36                                           | Jayanti, A., M. Neuvonen, A. Wearden, J. Morris, P. Foden, P. Brenchley, S. Mitra, G. Wood, J. Mason, S. Reddy, and P. Ande. 2015. 'Healthcare decision-making in end stage renal disease-patient preferences and clinical correlates', <i>BMC Nephrology</i> , 16 (1) (no pagination).                                | Population: Age <60 yrs.                           |
| 37<br>38<br>39<br>40<br>41<br>42<br>43<br>44<br>45<br>46 | Jennings, L. A., A. Palimaru, M. G. Corona, X. E. Cagigas, K. D. Ramirez, T. Zhao, R. D. Hays, N. S. Wenger, and D. B. Reuben. 2017. 'Patient and caregiver goals for dementia care', <i>Quality of Life Research</i> , 26: 685-93.                                                                                    | Outcome: Preferences from physicians or caregivers |

|                       |                                                                                                                                                                                                                                                                                                    |                                                    |
|-----------------------|----------------------------------------------------------------------------------------------------------------------------------------------------------------------------------------------------------------------------------------------------------------------------------------------------|----------------------------------------------------|
| 1<br>2<br>3<br>4<br>5 | Jerant, A. F., M. M. von Friederichs-Fitzwater, and M. Moore. 2005. 'Patients' perceived barriers to active self-management of chronic conditions', <i>Patient Educ Couns</i> , 57: 300-7.                                                                                                         | Outcome: Preferences not addressed                 |
| 6<br>7                | Joly, D., D. Anglicheau, C. Alberti, A. T. Nguyen, M. Touam, J. P. Grunfeld, and P. Jungers. 2003. 'Octogenarians reaching end-stage renal disease: Cohort study of decision-making and clinical outcomes', <i>Journal of the American Society of Nephrology</i> , 14: 1012-21.                    | Outcome: Preferences not addressed                 |
| 8<br>9<br>10          | Joubert, A., A. Kidd-Taylor, G. Christopher, J. Nanda, R. Warren, I. Lindong, and Y. Bronner. 2010. 'Complementary and alternative medical practice: self-care preferred vs. practitioner-based care among patients with asthma', <i>Journal of the National Medical Association</i> , 102: 562-9. | Population: Age <60 yrs.                           |
| 11<br>12<br>13        | Kamradt, M., J. Krisam, M. Kiel, M. Qreini, W. Besier, J. Szecsenyi, and D. Ose. 2017. 'Health-Related Quality of Life in Primary Care: Which Aspects Matter in Multimorbid Patients with Type 2 Diabetes Mellitus in a Community Setting?', 12: e0170883.                                         | Outcome: Preferences not addressed                 |
| 14<br>15<br>16        | Kangovi, S., N. Mitra, R. A. Smith, R. Kulkarni, L. Turr, H. Huo, K. Glanz, D. Grande, and J. A. Long. 2017. 'Decision-making and goal-setting in chronic disease management: Baseline findings of a randomized controlled trial', <i>Patient Education &amp; Counseling</i> , 100: 449-55.        | Population: Age <60 yrs.                           |
| 17<br>18<br>19        | Kaplan, A. L., C. M. Crespi, J. D. Saucedo, S. E. Connor, M. S. Litwin, and C. S. Saigal. 2014. 'Decisional conflict in economically disadvantaged men with newly diagnosed prostate cancer: Baseline results from a shared decision-making trial', <i>Cancer</i> , 120: 2721-27.                  | Population: Not multimorbid                        |
| 20<br>21<br>22        | Kaplan, A. L., C. M. Crespi, J. Saucedo, E. Dahan, S. Lambrechts, R. Kaplan, and C. Saigal. 2014. 'Predictors of decisional conflict in men with newly diagnosed prostate cancer: Baseline results from a shared decision-making trial', <i>Journal of Urology</i> , 1): e144-e45.                 | Duplicates                                         |
| 23<br>24<br>25        | Karlawish, J. H., A. Zbrozek, B. Kinosian, A. Gregory, A. Ferguson, and H. A. Glick. 2008. 'Preference-based quality of life in patients with Alzheimer's disease', <i>Alzheimer's and Dementia</i> , 4: 193-202.                                                                                  | Population: Not multimorbid                        |
| 26<br>27              | Karlsson, V., I. Bergbom, M. Ringdal, and A. Jonsson. 2016. 'After discharge home: a qualitative analysis of older ICU patients' experiences and care needs', <i>Scandinavian Journal of Caring Sciences</i> , 30: 749-56.                                                                         | Population: Not multimorbid                        |
| 28<br>29<br>30        | Karoff, M., W. Muller-Fahrnow, J. Kittel, H. O. Vetter, H. Gulker, and C. Spyra. 2002. '[Outpatient cardiological rehabilitation--acceptance and conditions related to choice of setting]', <i>Rehabilitation</i> , 41: 167-74.                                                                    | Population: Not multimorbid                        |
| 31<br>32              | Kates, Jeannette M. 2015. 'Treatment-related decisional conflict, quality of life, and comorbid illness in older adults with cancer', 75.                                                                                                                                                          | Outcome: Preferences not addressed                 |
| 33<br>34<br>35        | Kaur, M., E. Ashbeck, D. Ran, C. K. Kwok, and E. Vina. 2016. 'Knee pain and patient preference for knee replacement: Healthcare access matters', <i>Arthritis and Rheumatology</i> , 68 (Supplement 10): 1589-90.                                                                                  | Population: Not multimorbid                        |
| 36<br>37<br>38        | Keizer, J., I. Jzerman M.J, J. A. Van Til, and A. M. Wymenga. 2016. 'An a priori decision criteria elicitation method for treatment decision-making in elderly colorectal cancer patients', <i>Value in Health</i> , 19 (7): A392.                                                                 | Outcome: Preferences from physicians or caregivers |

|                                                                                                                                                                                                                                                                                                                                                                   |                                     |
|-------------------------------------------------------------------------------------------------------------------------------------------------------------------------------------------------------------------------------------------------------------------------------------------------------------------------------------------------------------------|-------------------------------------|
| Kelly, K. N., K. Noyes, J. Dolan, F. Fleming, J. R. Monson, M. Gonzalez, N. Sevdalis, and A. Dozier. 2016. 'Patient perspective on care transitions after colorectal surgery', <i>Journal of Surgical Research</i> , 203: 103-12.                                                                                                                                 | Population: Age <60 yrs.            |
| Khan, I. H., A. M. Garratt, A. Kumar, D. J. Cody, G. R. D. Catto, N. Edward, and A. M. MacLeod. 1995. 'Patients' perception of health on renal replacement therapy: Evaluation using a new instrument', <i>Nephrology Dialysis Transplantation</i> , 10: 684-89.                                                                                                  | Outcome: Preferences not addressed  |
| Khokhar, O. S., and J. H. Lewis. 2007. 'Reasons why patients infected with chronic hepatitis C virus choose to defer treatment: Do they alter their decision with time?', <i>Digestive Diseases and Sciences</i> , 52: 1168-76.                                                                                                                                   | Population: Age <60 yrs.            |
| Kim, C., F. C. Wright, N. J. Look Hong, G. Groot, L. Helyer, P. Meiers, M. L. Quan, R. Urquhart, R. Warburton, and A. R. Gagliardi. 2018. 'Patient and provider experiences with active surveillance: A scoping review', <i>PLoS ONE</i> , 13 (2) (no pagination).                                                                                                | Population: Not multimorbid         |
| Kim, D. H., and M. W. Rich. 2016. 'Patient-Centred Care of Older Adults With Cardiovascular Disease and Multiple Chronic Conditions', <i>Canadian Journal of Cardiology</i> , 32: 1097-107.                                                                                                                                                                       | Document type: Editorials & reviews |
| Kim, J., S. Kim, S. W. Hong, S. W. Kang, and M. An. 2017. 'Validation of the Decisional Conflict Scale for Evaluating Advance Care Decision Conflict in Community-dwelling Older Adults', <i>Asian Nursing Research</i> , 11: 297-303.                                                                                                                            | Population: Not multimorbid         |
| Kimmel, A. L., J. C. Wang, R. K. Scott, L. Briggs, and M. E. Lyon. 2015. 'FAMILY CEntered (FACE) advance care planning: Study design and methods for a patient-centered communication and decision-making intervention for patients with HIV/AIDS and their surrogate decision-makers', <i>Contemporary Clinical Trials</i> , 43: 172-78.                         | Population: Age <60 yrs.            |
| King Jr, J. T., M. A. Styn, J. Tsevat, and M. S. Roberts. 2003. "'Perfect health" versus "disease free": The impact of anchor point choice on the measurement of preferences and the calculation of disease-specific disutilities', <i>Medical Decision Making</i> , 23: 212-25.                                                                                  | Outcome: Preferences not addressed  |
| Kjoenniksen, I., M. Lindbaek, and A. G. Granas. 2006. 'Patients' attitudes towards and experiences of generic drug substitution in Norway', <i>Pharmacy World and Science</i> , 28: 284-89.                                                                                                                                                                       | Outcome: Preferences not addressed  |
| Knight, S. J., D. P. Nathan, A. K. Siston, M. W. Kattan, A. S. Elstein, K. M. Collela, M. S. Wolf, N. S. Slimack, C. L. Bennett, and R. M. Golub. 2002. 'Pilot study of a utilities-based treatment decision intervention for prostate cancer patients', <i>Clinical Prostate Cancer</i> , 1: 105-14.                                                             | Outcome: Preferences not addressed  |
| Ko, Eunjeong, and Jaehoon Lee. 2014. 'End-of-life treatment preference among low-income older adults: A race/ethnicity comparison study', <i>Journal of Health Care for the Poor and Underserved</i> , 25: 1021-33.                                                                                                                                               | Population: Not multimorbid         |
| Ko, J., E. Fox, P. Wicks, P. DasMahapatra, K. Kendall, W. Hong, E. Burton, K. Hawker, I. Kosoy, D. Liakhovitski, J. Park, and V. Herrera. 2016. 'Treatment preference in relapsing-remitting multiple sclerosis: An online choice study in patients and neurologists', <i>Neurology</i> . Conference: 68th American Academy of Neurology Annual Meeting, AAN, 86. | Population: Not multimorbid         |
| Ko, J., H. F. Kennecke, H. J. Lim, S. Gill, R. Woods, C. Speers, and W. Y. Cheung. 2012. 'Reasons for and outcomes of adjuvant chemotherapy choices in elderly patients with resected stage III colon cancer', <i>Journal of Clinical Oncology</i> . Conference, 30.                                                                                              | Outcome: Preferences not addressed  |

|                                                                                                                                                                                                                                                                                                                                                                 |                                       |
|-----------------------------------------------------------------------------------------------------------------------------------------------------------------------------------------------------------------------------------------------------------------------------------------------------------------------------------------------------------------|---------------------------------------|
| Konig, H. H., S. Bernert, and M. C. Angermeyer. 2005. '[Measuring preferences for depressive health states]', <i>Psychiatrische Praxis</i> , 32: 122-31.                                                                                                                                                                                                        | Population: Age <60 yrs.              |
| Kromer, C., M. L. Schaarschmidt, A. Schmieder, R. Herr, S. Goerd, and W. K. Peitsch. 2014. 'Patient preferences for treatment of psoriasis with biologics: A discrete choice experiment', <i>British Journal of Dermatology</i> , 171 (6): e125.                                                                                                                | Population: Age <60 yrs.              |
| Kruschinski, C., A. Klaassen, A. Breull, A. Broll, and E. Hummers-Pradier. 2010. 'Priorities of elderly dizzy patients in general practice. Findings and psychometric properties of the "Dizziness Needs Assessment" (DiNA)', <i>Zeitschrift fur Gerontologie und Geriatrie</i> , 43: 317-23.                                                                   | Population: Not multimorbid           |
| Kubacka, R. T., and R. P. Juhl. 1985. 'Attitudes of patients with hypertension or arthritis toward the frequency of medication administration', <i>Am J Hosp Pharm</i> , 42: 2499-501.                                                                                                                                                                          | Population: Not multimorbid           |
| Laakkonen, M. L., K. H. Pitkala, T. E. Strandberg, S. Berglind, and R. S. Tilvis. 2005. 'Older people's reasoning for resuscitation preferences and their role in the decision-making process', <i>Resuscitation</i> , 65: 165-71.                                                                                                                              | Population: Not multimorbid           |
| Laba, T. L., J. A. Brien, and S. Jan. 2012. 'Understanding rational non-adherence to medications. A discrete choice experiment in a community sample in Australia', <i>BMC Family Practice</i> , 13: 61.                                                                                                                                                        | Population: Age <60 yrs.              |
| LaDonna, K. A., J. Bates, G. R. Tait, A. McDougall, V. Schulz, and L. Lingard. 2017. '"Who is on your health-care team?' Asking individuals with heart failure about care team membership and roles', <i>Health expectations : an international journal of public participation in health care and health policy</i> , 20: 198-210.                             | Outcome: Preferences not addressed    |
| Lærum, Even, Siri Steine, Arnstein Finset, and Sverre Lundevall. 1998. 'Complex health problems in general practice: Do we need an instrument for consultation improvement and patient involvement? Theoretical foundation, development and user evaluation of the Patient Perspective Survey (PPS)', <i>Family Practice</i> , 15: 172-81.                      | Outcome: Preferences not addressed    |
| Laiteerapong, N., E. S. Huang, M. H. Chin, and N. Y. Acad Sci Annals. 2011. 'Prioritization of care in adults with diabetes and comorbidity', 1243: 69-87.                                                                                                                                                                                                      | Outcome: Preferences not addressed    |
| Lane, H., S. A. McLachlan, and J. Philip. 2014. 'Decision making factors in consultations between older people and their oncologists', <i>Asia-Pacific Journal of Clinical Oncology</i> , 9): 128-29.                                                                                                                                                           | Document type: Conference proceedings |
| Lang, V., S. Walter, J. Fessler, M. J. Koester, D. Ruetters, and J. Huebner. 2017. 'The role of the general practitioner in cancer care: a survey of the patients' perspective', <i>Journal of Cancer Research and Clinical Oncology</i> , 143: 895-904.                                                                                                        | Population: Not multimorbid           |
| Lannin, N. 2003. 'Goal attainment scaling allows program evaluation of a home-based occupational therapy program', <i>Occupational Therapy in Health Care</i> , 17: 43-54.                                                                                                                                                                                      | Population: Age <60 yrs.              |
| Larson, C. O., E. C. Nelson, D. Gustafson, and P. B. Batalden. 1996. 'The relationship between meeting patients' information needs and their satisfaction with hospital care and general health status outcomes', <i>International journal for quality in health care: journal of the International Society for Quality in Health Care / ISQua</i> , 8: 447-56. | Population: Not multimorbid           |

|                                                                                                                                                                                                                                                                                                                                                                                            |                                       |
|--------------------------------------------------------------------------------------------------------------------------------------------------------------------------------------------------------------------------------------------------------------------------------------------------------------------------------------------------------------------------------------------|---------------------------------------|
| Laudet, Alexandre B., and William White. 2010. 'What are your priorities right now? Identifying service needs across recovery stages to inform service development', <i>Journal of Substance Abuse Treatment</i> , 38: 51-59.                                                                                                                                                              | Population: Age <60 yrs.              |
| Lavelle, K., A. M. Sowerbutts, N. Bundred, M. Pilling, L. Degner, C. Stockton, and C. Todd. 2014. 'Is lack of surgery for older breast cancer patients in the UK explained by patient choice or poor health A prospective cohort study', <i>British Journal of Cancer</i> , 110: 573-83.                                                                                                   | Population: Not multimorbid           |
| Lechner, S., W. Herzog, F. Boehlen, I. Maatouk, K. U. Saum, H. Brenner, and B. Wild. 2016. 'Control preferences in treatment decisions among older adults - Results of a large population-based study', <i>Journal of Psychosomatic Research</i> , 86: 28-33.                                                                                                                              | Population: Not multimorbid           |
| Lederer, S., M. J. Fischer, H. S. Gordon, A. Wadhwa, S. Popli, and E. J. Gordon. 2016. 'A question prompt sheet for adult patients with chronic kidney disease', <i>BMC Nephrology</i> , 17 (1) (no pagination).                                                                                                                                                                           | Outcome: Preferences not addressed    |
| Lee, P. Y., E. M. Khoo, W. Y. Low, Y. K. Lee, K. L. Abdullah, S. A. Azmi, and C. J. Ng. 2016. 'Mismatch between health-care professionals' and patients' views on a diabetes patient decision aid: a qualitative study', <i>Health expectations: an international journal of public participation in health care and health policy</i> , 19: 427-36.                                       | Population: Age <60 yrs.              |
| Lee, Y. K., C. J. Ng, and W. Y. Low. 2017. 'Addressing unmet needs of patients with chronic diseases: Impact of the VISIT website during consultations', <i>Journal of Evaluation in Clinical Practice</i> , 23: 1281-88.                                                                                                                                                                  | Outcome: Preferences not addressed    |
| Legros, B., P. Boon, B. Ceulemans, T. Coppens, K. Geens, H. Hauman, L. Lagae, A. Meurs, L. Mol, M. Ossemann, K. van Rijckevorsel, M. Van Zandijcke, P. Vrielynck, D. Wagemans, and T. Grisar. 2012. 'Development of an electronic decision tool to support appropriate treatment choice in adult patients with epilepsy--Epi-Scope()', <i>Seizure</i> , 21: 32-9.                          | Outcome: Preferences not addressed    |
| Lenferink, A., P. Frith, P. van der Valk, J. Buckman, R. Sladek, P. Cafarella, J. van der Palen, and T. Effing. 2013. 'A self-management approach using self-initiated action plans for symptoms with ongoing nurse support in patients with Chronic Obstructive Pulmonary Disease (COPD) and comorbidities: the COPE-III study protocol', <i>Contemporary Clinical Trials</i> , 36: 81-9. | Outcome: Preferences not addressed    |
| Leonardsen, A. L., and L. P. Jelsness-Jorgensen. 2017. 'Patient experiences and predictors in an acute geriatric ward: A cross-sectional study', <i>Journal of Clinical Nursing</i> , 26: 4567-73.                                                                                                                                                                                         | Outcome: Preferences not addressed    |
| Lewis, C. L., C. E. Kistler, H. R. Amick, L. C. Watson, D. L. Bynum, L. C. Walter, and M. P. Pignone. 2006. 'Older adults' attitudes about continuing cancer screening later in life: a pilot study interviewing residents of two continuing care communities', <i>BMC Geriatrics</i> , 6: 10.                                                                                             | Population: Not multimorbid           |
| Lewis, C. L., C. P. DeLeon, M. P. Pignone, and C. E. Golin. 2011. 'Decision support and individualized decision making for colorectal cancer screening in the elderly', <i>Journal of General Internal Medicine</i> , 1): S120-S21.                                                                                                                                                        | Document type: Conference proceedings |
| Lewis, C. L., T. Fried, J. S. Ross, J. Aminawung, L. Werner, C. Kistler, M. Tinetti, K. McKenzie, I. Genao, and C. Gross. 2012. 'Understanding and decision making about screening colonoscopy for older persons with multimorbidity', <i>Journal of General Internal Medicine</i> , 2): S341.                                                                                             | Document type: Conference proceedings |

|                                              |                                                                                                                                                                                                                                                                                                                                                                                                                |                                       |
|----------------------------------------------|----------------------------------------------------------------------------------------------------------------------------------------------------------------------------------------------------------------------------------------------------------------------------------------------------------------------------------------------------------------------------------------------------------------|---------------------------------------|
| 1<br>2<br>3<br>4<br>5                        | Lewis, C., C. P. DeLeon, M. P. Pignone, and C. Golin. 2011. 'Patient and physician discussions after decision support for colorectal cancer screening in the elderly', <i>Journal of General Internal Medicine</i> , 1): S118.                                                                                                                                                                                 | Duplicates                            |
| 6<br>7<br>8                                  | Lewis, E. F., P. A. Johnson, W. Johnson, C. Collins, L. Griffin, and L. W. Stevenson. 2001. 'Preferences for quality of life or survival expressed by patients with heart failure', <i>Journal of Heart and Lung Transplantation</i> , 20: 1016-24.                                                                                                                                                            | Population: Age <60 yrs.              |
| 9<br>10<br>11                                | Liska, J., and A. Beal. 2017. 'One Patient Is Not One Condition: Delivering Patient-Centered Care to Those With Multiple Chronic Conditions', <i>Therapeutic Innovation and Regulatory Science</i> , 51: 468-70.                                                                                                                                                                                               | Document type: Editorials & reviews   |
| 12<br>13<br>14                               | Liu, L. N., C. H. Chen, T. W. Liu, Y. C. Lin, S. C. K. Lee, and S. T. Tang. 2015. 'Preferences for aggressive end-of-life care and their determinants among Taiwanese terminally ill cancer patients', <i>Cancer Nursing</i> , 38: E9-E18.                                                                                                                                                                     | Document type: Conference proceedings |
| 15<br>16<br>17                               | Lo, C., D. Ilic, H. Teede, A. Cass, G. Fulcher, M. Gallagher, G. Johnson, P. G. Kerr, T. Mathew, K. Murphy, K. Polkinghorne, R. Walker, and S. Zoungas. 2016. 'The perspectives of patients on health-care for co-morbid diabetes and chronic kidney disease: A qualitative study', <i>PLoS ONE</i> , 11 (1) (no pagination).                                                                                  | Outcome: Preferences not addressed    |
| 18<br>19<br>20                               | Lo, C., Y. Tran, K. Anderson, A. Craig, and J. Middleton. 2016. 'Functional Priorities in Persons with Spinal Cord Injury: Using Discrete Choice Experiments To Determine Preferences', <i>Journal of Neurotrauma</i> , 33: 1958-68.                                                                                                                                                                           | Population: Age <60 yrs.              |
| 21<br>22<br>23                               | Loffler, C., A. Altiner, W. Streich, C. O. Stolzenbach, A. Fuchs, E. Drewelow, A. Hornung, G. Feldmeier, H. van den Bussche, and H. Kaduszkiewicz. 2015. '[Approaches of general practitioners and patients to multimorbidity. Qualitative study]', <i>Zeitschrift fur Gerontologie und Geriatrie</i> , 48: 452-6.                                                                                             | Outcome: Preferences not addressed    |
| 24<br>25<br>26                               | Loffler, C., E. Drewelow, S. D. Paschka, M. Frankenstein, J. Eger, L. Jatsch, E. C. Reisinger, J. F. Hallauer, B. Drewelow, K. Heidorn, H. Schroder, A. Wollny, G. Kundt, C. Schmidt, and A. Altiner. 2014. 'Optimizing polypharmacy among elderly hospital patients with chronic diseases--study protocol of the cluster randomized controlled POLITE-RCT trial', <i>Implementation science: IS</i> , 9: 151. | Outcome: Preferences not addressed    |
| 27<br>28<br>29                               | Loffler, C., H. Kaduszkiewicz, C. O. Stolzenbach, W. Streich, A. Fuchs, H. van den Bussche, F. Stolper, and A. Altiner. 2012. 'Coping with multimorbidity in old age--a qualitative study', <i>BMC Fam Pract</i> , 13: 45.                                                                                                                                                                                     | Outcome: Preferences not addressed    |
| 30<br>31<br>32                               | Lum, H. D., and R. L. Sudore. 2016. 'Advance Care Planning and Goals of Care Communication in Older Adults with Cardiovascular Disease and Multi-Morbidity', <i>Clinics in Geriatric Medicine</i> , 32: 247-60.                                                                                                                                                                                                | Document type: Editorials & reviews   |
| 33<br>34<br>35                               | Lupari, M., V. Coates, G. Adamson, and G. E. Crealey. 2011. '"We're just not getting it right"--how should we provide care to the older person with multi-morbid chronic conditions?', <i>Journal of Clinical Nursing</i> , 20: 1225-35.                                                                                                                                                                       | Outcome: Preferences not addressed    |
| 36<br>37<br>38                               | MacInnes, J. 2014. 'An exploration of illness representations and treatment beliefs in heart failure', <i>J Clin Nurs</i> , 23: 1249-56.                                                                                                                                                                                                                                                                       | Outcome: Preferences not addressed    |
| 39<br>40<br>41<br>42<br>43<br>44<br>45<br>46 | MacKinnon, H. J., A. L. Clarke, H. L. Young, K. L. Hull, J. O. Burton, and A. C. Smith. 2015. 'Creating a SPARK: Investigating exercise behaviour and preferences in patients with chronic kidney disease to aid the design of exercise programmes', <i>International Journal of Therapy &amp; Rehabilitation</i> , 22: 52-52.                                                                                 | Document type: Conference proceedings |

|                                                                                                                                                                                                                                                                                                                                                                                                                                           |                                       |
|-------------------------------------------------------------------------------------------------------------------------------------------------------------------------------------------------------------------------------------------------------------------------------------------------------------------------------------------------------------------------------------------------------------------------------------------|---------------------------------------|
| Madden, M., G. Furze, and R. J. Lewin. 2011. 'Complexities of patient choice in cardiac rehabilitation: Qualitative findings', <i>Journal of Advanced Nursing</i> , 67: 540-49.                                                                                                                                                                                                                                                           | Population: Not multimorbid           |
| Maeng, D. D., G. R. Martsolf, D. P. Scanlon, and J. B. Christianson. 2012. 'Care coordination for the chronically ill: understanding the patient's perspective', <i>Health Services Research</i> , 47: 1960-79.                                                                                                                                                                                                                           | Population: Age <60 yrs.              |
| Mahler, C., Sjang, K. Hermann, W. E. Haefell, and J. Szecsenyl. 2009. 'Information on medications - How do chronically ill patients assess counselling on drugs in general practice?. [German]', <i>Deutsche Medizinische Wochenschrift</i> , 134: 1620-24.                                                                                                                                                                               | Outcome: Preferences not addressed    |
| Mahmood, S., M. Van Oosterhout, S. De Jong, R. Landewe, P. Van Riel, and L. H. D. Van Tuyl. 2017. 'Evaluating quality of care in rheumatoid arthritis: The patient perspective', <i>RMD Open</i> , 3 (1) (no pagination).                                                                                                                                                                                                                 | Population: Age <60 yrs.              |
| Mahomed, R., W. St John, and E. Patterson. 2012. 'Understanding the process of patient satisfaction with nurse-led chronic disease management in general practice', <i>Journal of Advanced Nursing</i> , 68: 2538-49.                                                                                                                                                                                                                     | Outcome: Preferences not addressed    |
| Maly, R. C., B. Leake, and R. A. Silliman. 2003. 'Health care disparities in older patients with breast carcinoma: Informational support from physicians', <i>Cancer</i> , 97: 1517-27.                                                                                                                                                                                                                                                   | Population: Not multimorbid           |
| Mandelblatt, J. S., V. B. Sheppard, A. Hurria, G. Kimmick, C. Isaacs, K. L. Taylor, A. B. Kornblith, A. M. Noone, G. Luta, M. Tallarico, W. T. Barry, L. Hunegs, R. Zon, M. Naughton, E. Winer, C. Hudis, S. B. Edge, H. J. Cohen, and H. Muss. 2010. 'Breast cancer adjuvant chemotherapy decisions in older women: The role of patient preference and interactions with physicians', <i>Journal of Clinical Oncology</i> , 28: 3146-53. | Population: Not multimorbid           |
| Mandelblatt, J., B. Kreling, M. Figueiredo, and S. Feng. 2006. 'What is the impact of shared decision making on treatment and outcomes for older women with breast cancer?', <i>Journal of Clinical Oncology</i> , 24: 4908-13.                                                                                                                                                                                                           | Outcome: Preferences not addressed    |
| Mandelblatt, J., V. Sheppard, A. Hurria, G. Kimmick, C. Isaacs, K. Taylor, G. Luta, A. Noone, A. Kornblith, and W. Barry. 2009. 'Patient preference as a determinant of breast cancer adjuvant chemotherapy use in older women: CALGB #369901', <i>Journal of Clinical Oncology</i> , 1): 9544.                                                                                                                                           | Document type: Conference proceedings |
| Maneze, D., S. Dennis, H. Y. Chen, J. Taggart, S. Vagholar, J. Bunker, and S. T. Liaw. 2014. 'Multidisciplinary care: experience of patients with complex needs', <i>Aust J Prim Health</i> , 20: 20-6.                                                                                                                                                                                                                                   | Outcome: Preferences not addressed    |
| Mangin, D., G. Stephen, V. Bismah, and C. Risdon. 2016. 'Making patient values visible in healthcare: A systematic review of tools to assess patient treatment priorities and preferences in the context of multimorbidity', <i>BMJ Open</i> , 6 (6) (no pagination).                                                                                                                                                                     | Outcome: Preferences not addressed    |
| Manigault, A. W., I. M. Handley, and S. R. Whillock. 2015. 'Assessment of unconscious decision aids applied to complex patient-centered medical decisions', <i>Journal of medical Internet research</i> , 17: e37.                                                                                                                                                                                                                        | Population: Age <60 yrs.              |
| Markowitz, J. C., K. B. Meehan, E. Petkova, Y. Zhao, P. E. Van Meter, Y. Neria, H. Pessin, and Y. Nazia. 2016. 'Treatment preferences of psychotherapy patients with chronic PTSD', <i>Journal of Clinical Psychiatry</i> , 77: 363-70.                                                                                                                                                                                                   | Population: Age <60 yrs.              |



|    |                                                                                                                                                                                                                                                                                                                                                                                                                                                                                                                                             |                                     |
|----|---------------------------------------------------------------------------------------------------------------------------------------------------------------------------------------------------------------------------------------------------------------------------------------------------------------------------------------------------------------------------------------------------------------------------------------------------------------------------------------------------------------------------------------------|-------------------------------------|
| 1  |                                                                                                                                                                                                                                                                                                                                                                                                                                                                                                                                             |                                     |
| 2  |                                                                                                                                                                                                                                                                                                                                                                                                                                                                                                                                             |                                     |
| 3  |                                                                                                                                                                                                                                                                                                                                                                                                                                                                                                                                             |                                     |
| 4  | Marques, I., D. Petty, T. Raynor, and A. Blenkinsopp. 2017. 'Reducing inappropriate polypharmacy through a patient-centred, shared decision-making model of deprescribing', <i>Pharmacoepidemiology and Drug Safety</i> , 26 (Supplement 1): 12-13.                                                                                                                                                                                                                                                                                         | Document type: Editorials & reviews |
| 5  |                                                                                                                                                                                                                                                                                                                                                                                                                                                                                                                                             |                                     |
| 6  | Marschall-Kehrel, D., R. G. Roberts, and L. Brubaker. 2006. 'Patient-reported outcomes in overactive bladder: the influence of perception of condition and expectation for treatment benefit', <i>Urology</i> , 68: 29-37.                                                                                                                                                                                                                                                                                                                  | Outcome: Preferences not addressed  |
| 7  |                                                                                                                                                                                                                                                                                                                                                                                                                                                                                                                                             |                                     |
| 8  | Mathar, Helle, Pernille Fastholm, Peter Lange, and Niels Sandholm Larsen. 2017. 'Why do patients decline participation in offered pulmonary rehabilitation? A qualitative study', <i>Clinical Rehabilitation</i> , 31: 1674-83.                                                                                                                                                                                                                                                                                                             | Outcome: Preferences not addressed  |
| 9  |                                                                                                                                                                                                                                                                                                                                                                                                                                                                                                                                             |                                     |
| 10 |                                                                                                                                                                                                                                                                                                                                                                                                                                                                                                                                             |                                     |
| 11 | Mayo, N. M., M. Wallhagen, J. Johnson, and B. Miller. 2013. 'Health care decision-making among older adults with mild cognitive impairment', <i>Journal of the American Geriatrics Society</i> , 3): S342.                                                                                                                                                                                                                                                                                                                                  | Outcome: Preferences not addressed  |
| 12 |                                                                                                                                                                                                                                                                                                                                                                                                                                                                                                                                             |                                     |
| 13 |                                                                                                                                                                                                                                                                                                                                                                                                                                                                                                                                             |                                     |
| 14 | McGee, M. A., D. W. Howie, P. Ryan, J. R. Moss, and O. T. Holubowycz. 2002. 'Comparison of patient and doctor responses to a total hip arthroplasty clinical evaluation questionnaire', <i>Journal of Bone &amp; Joint Surgery - American Volume</i> , 84-A: 1745-52.                                                                                                                                                                                                                                                                       | Outcome: Preferences not addressed  |
| 15 |                                                                                                                                                                                                                                                                                                                                                                                                                                                                                                                                             |                                     |
| 16 | McGilton, K. S., S. Vellani, L. Yeung, J. Chishtie, E. Commisso, J. Ploeg, M. K. Andrew, A. P. Ayala, M. Gray, D. Morgan, A. F. Chow, E. Parrott, D. Stephens, L. Hale, M. Keatings, J. Walker, W. P. Wodchis, V. Dube, J. McElhane, and M. Puts. 2018. 'Identifying and understanding the health and social care needs of older adults with multiple chronic conditions and their caregivers: a scoping review', <i>BMC Geriatr</i> , 18: 231.                                                                                             | Document type: Editorials & reviews |
| 17 |                                                                                                                                                                                                                                                                                                                                                                                                                                                                                                                                             |                                     |
| 18 |                                                                                                                                                                                                                                                                                                                                                                                                                                                                                                                                             |                                     |
| 19 |                                                                                                                                                                                                                                                                                                                                                                                                                                                                                                                                             |                                     |
| 20 |                                                                                                                                                                                                                                                                                                                                                                                                                                                                                                                                             |                                     |
| 21 | McHorney, C., N. J. Zhang, and M. Villigran. 2012. 'Temporal-outcome framing preferences for prescription medication information among adults with chronic disease in the United States', <i>Value in Health</i> , 15 (4): A198.                                                                                                                                                                                                                                                                                                            | Population: Not multimorbid         |
| 22 |                                                                                                                                                                                                                                                                                                                                                                                                                                                                                                                                             |                                     |
| 23 | McKenna, R. J., Sr. 1994. 'Clinical aspects of cancer in the elderly. Treatment decisions, treatment choices, and follow-up', <i>Cancer</i> , 74: 2107-17.                                                                                                                                                                                                                                                                                                                                                                                  | Document type: Editorials & reviews |
| 24 |                                                                                                                                                                                                                                                                                                                                                                                                                                                                                                                                             |                                     |
| 25 | McMullen, C. K., M. M. Safford, H. B. Bosworth, S. Phansalkar, A. Leong, M. B. Fagan, A. Trontell, M. Rumptz, M. L. Vandermeer, Education Centers for, Group Research on Therapeutics Patient-Centered Medication Management Workshop Working, W. B. Brinkman, R. Burkholder, L. Frank, K. Hommel, R. Mathews, M. C. Hornbrook, M. Seid, M. Fordis, B. Lambert, N. McElwee, and J. A. Singh. 2015. 'Patient-centered priorities for improving medication management and adherence', <i>Patient Education &amp; Counseling</i> , 98: 102-10. | Population: Age <60 yrs.            |
| 26 |                                                                                                                                                                                                                                                                                                                                                                                                                                                                                                                                             |                                     |
| 27 |                                                                                                                                                                                                                                                                                                                                                                                                                                                                                                                                             |                                     |
| 28 |                                                                                                                                                                                                                                                                                                                                                                                                                                                                                                                                             |                                     |
| 29 |                                                                                                                                                                                                                                                                                                                                                                                                                                                                                                                                             |                                     |
| 30 |                                                                                                                                                                                                                                                                                                                                                                                                                                                                                                                                             |                                     |
| 31 | Meranius, M. S., and L. M. Hammar. 2016. 'How does the healthcare system affect medication self-management among older adults with multimorbidity?', <i>Scand J Caring Sci</i> , 30: 91-8.                                                                                                                                                                                                                                                                                                                                                  | Outcome: Preferences not addressed  |
| 32 |                                                                                                                                                                                                                                                                                                                                                                                                                                                                                                                                             |                                     |
| 33 |                                                                                                                                                                                                                                                                                                                                                                                                                                                                                                                                             |                                     |
| 34 | Merlin, J. S., S. R. Young, M. O. Johnson, M. Saag, W. Demonte, R. Modi, S. Shurbaji, W. A. Anderson, R. Kerns, M. J. Bair, S. Kertesz, S. Davies, and J. M. Turan. 2017. 'Using Patient Perspectives to Inform the Development of a Behavioral Intervention for Chronic Pain in Patients with HIV: A Qualitative Study', <i>Pain medicine (Malden, Mass.)</i> , 18: 879-88.                                                                                                                                                                | Population: Age <60 yrs.            |
| 35 |                                                                                                                                                                                                                                                                                                                                                                                                                                                                                                                                             |                                     |
| 36 |                                                                                                                                                                                                                                                                                                                                                                                                                                                                                                                                             |                                     |
| 37 |                                                                                                                                                                                                                                                                                                                                                                                                                                                                                                                                             |                                     |
| 38 | Mihaylov, S., C. Stark, E. McColl, N. Steen, A. Vanoli, G. Rubin, R. Curless, R. Barton, and J. Bond. 2008. 'Stepped treatment of older adults on laxatives. The STOOL trial', <i>Health Technology Assessment</i> , 12: iii-139.                                                                                                                                                                                                                                                                                                           | Population: Not multimorbid         |
| 39 |                                                                                                                                                                                                                                                                                                                                                                                                                                                                                                                                             |                                     |
| 40 |                                                                                                                                                                                                                                                                                                                                                                                                                                                                                                                                             |                                     |
| 41 |                                                                                                                                                                                                                                                                                                                                                                                                                                                                                                                                             |                                     |
| 42 |                                                                                                                                                                                                                                                                                                                                                                                                                                                                                                                                             |                                     |
| 43 |                                                                                                                                                                                                                                                                                                                                                                                                                                                                                                                                             |                                     |
| 44 |                                                                                                                                                                                                                                                                                                                                                                                                                                                                                                                                             |                                     |
| 45 |                                                                                                                                                                                                                                                                                                                                                                                                                                                                                                                                             |                                     |
| 46 |                                                                                                                                                                                                                                                                                                                                                                                                                                                                                                                                             |                                     |

|                       |                                                                                                                                                                                                                                                                                                                                                                                                              |                                       |
|-----------------------|--------------------------------------------------------------------------------------------------------------------------------------------------------------------------------------------------------------------------------------------------------------------------------------------------------------------------------------------------------------------------------------------------------------|---------------------------------------|
| 1<br>2<br>3<br>4<br>5 | Millman, J., K. Galway, O. Santin, and J. Reid. 2016. 'Cancer and serious mental illness--patient, caregiver and professional perspectives: study protocol', <i>Journal of Advanced Nursing</i> , 72: 217-26.                                                                                                                                                                                                | Document type: Study protocols        |
| 6<br>7<br>8<br>9      | Mishuris, R. G., M. Stewart, G. M. Fix, T. Marcello, D. K. McInnes, T. P. Hogan, J. B. Boardman, and S. R. Simon. 2015. 'Barriers to patient portal access among veterans receiving home-based primary care: a qualitative study', <i>Health expectations : an international journal of public participation in health care and health policy</i> , 18: 2296-305.                                            | Outcome: Preferences not addressed    |
| 10<br>11<br>12<br>13  | Miskulin, D. C., K. B. Meyer, N. V. Athienites, A. A. Martin, N. Terrin, J. V. Marsh, N. E. Fink, J. Coresh, N. R. Powe, M. J. Klag, and A. S. Levey. 2002. 'Comorbidity and other factors associated with modality selection in incident dialysis patients: the CHOICE Study. Choices for Healthy Outcomes in Caring for End-Stage Renal Disease', <i>American Journal of Kidney Diseases</i> , 39: 324-36. | Outcome: Preferences not addressed    |
| 14<br>15              | Mittinty, M. M., A. Marshall, and G. Harvey. 2018. 'What integrated care means from an older person's perspective? A scoping review protocol', <i>BMJ Open</i> , 8 (3) (no pagination).                                                                                                                                                                                                                      | Document type: Study protocols        |
| 16<br>17<br>18        | Mockford, C., Z. Fritz, R. George, R. Court, A. Grove, B. Clarke, R. Field, and G. D. Perkins. 2015. 'Do not attempt cardiopulmonary resuscitation (DNACPR) orders: a systematic review of the barriers and facilitators of decision-making and implementation', <i>Resuscitation</i> , 88: 99-113.                                                                                                          | Outcome: Preferences not addressed    |
| 19<br>20<br>21        | Moise, N., S. Ye, C. Alcantara, K. Davidson, and I. Kronish. 2015. 'Depression and preference for shared decision making amongst patients with uncontrolled hypertension', <i>Psychosomatic Medicine</i> , 77 (3): A28.                                                                                                                                                                                      | Document type: Conference proceedings |
| 22<br>23<br>24        | Montague, L., B. A. Boland, and C. Wright. 2012. 'Use of advance directives in an elderly home-bound population', <i>Journal of General Internal Medicine</i> , 2): S342.                                                                                                                                                                                                                                    | Document type: Conference proceedings |
| 25<br>26<br>27        | Mooijaart, S. P., K. Broekhuizen, S. Trompet, A. J. M. de Craen, J. Gussekloo, A. Oleksik, D. van Heemst, G. J. Blauw, and M. Muller. 2015. 'Evidence-based medicine in older patients: How can we do better?', <i>Netherlands Journal of Medicine</i> , 73: 211-18.                                                                                                                                         | Outcome: Preferences not addressed    |
| 28<br>29              | Moorhouse, P., and L. H. Mallery. 2012. 'Palliative and therapeutic harmonization: A model for appropriate decision-making in frail older adults', <i>Journal of the American Geriatrics Society</i> , 60: 2326-32.                                                                                                                                                                                          | Outcome: Preferences not addressed    |
| 30<br>31<br>32<br>33  | Moraleda Barba, S., M. I. Ballesta Rodriguez, A. L. Delgado Quero, N. Lietor Villajos, A. Moreno Corredor, and M. Delgado Rodriguez. 2015. '[The adaptation and validation to Spanish of the questionnaire Aid to Capacity Evaluation (ACE), for the assessment of the ability of patients in medical decision-making]', <i>Atencion Primaria</i> , 47: 149-57.                                              | Outcome: Preferences not addressed    |
| 34<br>35<br>36        | Morecroft, C., J. Cantrill, and M. P. Tully. 2006. 'Individual patient's preferences for hypertension management: a Q-methodological approach', <i>Patient Educ Couns</i> , 61: 354-62.                                                                                                                                                                                                                      | Population: Age <60 yrs.              |
| 37<br>38<br>39<br>40  | Morgan, J. L., M. Burton, K. Collins, K. J. Lifford, T. G. Robinson, K. L. Cheung, R. Audisio, M. W. Reed, L. Wyld, and Management Bridging Age Gap Trial. 2015. 'The balance of clinician and patient input into treatment decision-making in older women with operable breast cancer', <i>Psycho-Oncology</i> , 24: 1761-66.                                                                               | Population: Not multimorbid           |

41  
42  
43  
44  
45  
46

1  
2  
3  
4  
5  
6  
7  
8  
9  
10  
11  
12  
13  
14  
15  
16  
17  
18  
19  
20  
21  
22  
23  
24  
25  
26  
27  
28  
29  
30  
31  
32  
33  
34  
35  
36  
37  
38  
39  
40  
41  
42  
43  
44  
45  
46

|                                                                                                                                                                                                                                                                                              |                                     |
|----------------------------------------------------------------------------------------------------------------------------------------------------------------------------------------------------------------------------------------------------------------------------------------------|-------------------------------------|
| Morishige, R., H. Nakajima, K. Yoshizawa, J. Mahlich, and R. Sruamsiri. 2017. 'Preferences Regarding Shared Decision-Making in Japanese Inflammatory Bowel Disease Patients', <i>Advances in Therapy</i> , 33: 2242-56.                                                                      | Population: Age <60 yrs.            |
| Morsch, P., A. R. Mirandola, I. C. Caberlon, and A. J. G. Bos. 2017. 'Factors associated with health-related decision-making in older adults from Southern Brazil', <i>Geriatrics &amp; Gerontology International</i> , 17: 798-803.                                                         | Population: Not multimorbid         |
| Mortsiefer, A., A. Altiner, A. Ernst, H. Kadusiewicz, A. Krahe, C. Mellert, I. Schafer, C. O. Stolzenbach, B. Wiese, and C. Loffler. 2017. 'Satisfaction with general practice care in German patients with multimorbidity: A cross-sectional study', <i>Family Practice</i> , 34: 452-58.   | Outcome: Preferences not addressed  |
| Moss, A. H. 2017. 'Integrating Supportive Care Principles Into Dialysis Decision Making: A Primer for Palliative Medicine Providers', <i>Journal of Pain and Symptom Management</i> , 53: 656-+.                                                                                             | Document type: Editorials & reviews |
| Moultry, A. M., and I. O. Poon. 2008. 'Perceived value of a home-based medication therapy management program for the elderly', <i>The Consultant pharmacist : the journal of the American Society of Consultant Pharmacists</i> , 23: 877-85.                                                | Outcome: Preferences not addressed  |
| Muhlbacher, A. C., and M. Nbling. 2010. 'Analysis of patients preferences: Direct assessment and discrete-choice experiment in therapy of adults with attention-deficit hyperactivity disorder', <i>Patient</i> , 3: 285-94.                                                                 | Population: Age <60 yrs.            |
| Muhlbacher, A. C., S. Bethge, S. D. Reed, and K. A. Schulman. 2016. 'Patient Preferences for Features of Health Care Delivery Systems: A Discrete Choice Experiment', <i>Health Services Research</i> , 51: 704-27.                                                                          | Population: Age <60 yrs.            |
| Muhlbacher, A. C., U. Junker, C. Juhnke, E. Stemmler, T. Kohlmann, F. Leverkus, and M. Nubling. 2015. 'Chronic pain patients' treatment preferences: a discrete-choice experiment', <i>European Journal of Health Economics</i> , 16: 613-28.                                                | Population: Age <60 yrs.            |
| Muralidhar, V., B. S. Rose, Y. W. Chen, M. D. Nezoslosky, and P. L. Nguyen. 2016. 'Association Between Travel Distance and Choice of Treatment for Prostate Cancer: Does Geography Reduce Patient Choice?', <i>International Journal of Radiation Oncology Biology Physics</i> , 96: 313-17. | Population: Not multimorbid         |
| Murphy, D. J., D. Burrows, S. Santilli, A. W. Kemp, S. Tenner, B. Kreling, and J. Teno. 1994. 'THE INFLUENCE OF THE PROBABILITY OF SURVIVAL ON PATIENTS PREFERENCES REGARDING CARDIOPULMONARY-RESUSCITATION', <i>New England Journal of Medicine</i> , 330: 545-49.                          | Population: Not multimorbid         |
| Murphy, D. J., G. J. Gahm, S. Santilli, P. North, S. C. N. Oliver, and H. Shapiro. 2002. 'Seniors' preferences for cancer screening and medication use based on absolute risk reduction', <i>Journals of Gerontology Series a-Biological Sciences and Medical Sciences</i> , 57: M100-M05.   | Population: Not multimorbid         |
| Musila, N., M. Underwood, A. W. McCaskie, N. Black, A. Clarke, and J. H. van der Meulen. 2011. 'Referral recommendations for osteoarthritis of the knee incorporating patients' preferences', <i>Family Practice</i> , 28: 68-74.                                                            | Outcome: Preferences not addressed  |
| Mutebi, A., T. L. Warholak, L. E. Hines, R. Plummer, and D. C. Malone. 2013. 'Assessing patients' information needs regarding drug-drug interactions', <i>Journal of the American Pharmacists Association</i> , 53: 39-45.                                                                   | Outcome: Preferences not addressed  |

|                                                                                                                                                                                                                                                                                                                  |                                       |
|------------------------------------------------------------------------------------------------------------------------------------------------------------------------------------------------------------------------------------------------------------------------------------------------------------------|---------------------------------------|
| Nct, University Yale, A. Hartford Foundation The John, Gordon, Foundation Betty Moore, Foundation Robert Wood Johnson, and Institute Patient-Centered Outcomes Research. 2018. "Patient Priorities Care (PPC)." In.                                                                                              | Ongoing study                         |
| Neumiller, J. J., R. Vandermause, B. J. Gates, P. David, M. Altman, K. R. Tuttle, C. Corbett, D. Sunwold, P. Benson, and G. Burton. 2015. 'Medication - Taking practices and preferences in patients with multiple chronic medical conditions (MCMC)', <i>American Journal of Kidney Diseases</i> , 65 (4): A61. | Document type: Conference proceedings |
| Neuner-Jehle, S. 2016. 'How to avoid polypharmacy in practice and hospital? An overview with practical tools. [German]', <i>Gynakologische Praxis</i> , 41: 337-46.                                                                                                                                              | Document type: Editorials & reviews   |
| Neuner-Jehle, S. 2017. 'Systematic approaches to reduce polypharmacy: An overview with practical tools. [German]', <i>Diabetologe</i> , 13: 85-90.                                                                                                                                                               | Document type: Editorials & reviews   |
| Neuner-Jehle, S., S. Zechmann, D. G. Maissen, T. Rosemann, and O. Senn. 2017. 'Patient-provider concordance in the perception of illness and disease: A cross-sectional study among multimorbid patients and their general practitioners in Switzerland', <i>Patient Preference and Adherence</i> , 11: 1451-58. | Outcome: Preferences not addressed    |
| Nguyen, G. C., A. Tuskey, T. M. Bayless, T. A. LaVeist, and S. R. Brant. 2008. 'Community-based health preferences for proctocolectomy: a race comparison', <i>Digestive Diseases &amp; Sciences</i> , 53: 741-6.                                                                                                | Population: Age <60 yrs.              |
| Nilsdotter, A. K., and F. Isaksson. 2010. 'Patient relevant outcome 7 years after total hip replacement for OA - A prospective study', <i>BMC Musculoskeletal Disorders</i> , 11 (no pagination).                                                                                                                | Outcome: Preferences not addressed    |
| Noel, L. 2010. 'An Ethnic/Racial Comparison of Causal Beliefs and Treatment Preferences for the Symptoms of Depression Among Patients with Diabetes', <i>Diabetes Educator</i> , 36: 816-27.                                                                                                                     | Population: Age <60 yrs.              |
| Noel, P., B. C. Frueh, A. C. Larme, and J. A. Pugh. 2005. 'Cottaborative care needs and preferences of primary care patients with multimorbidity', <i>Health Expectations</i> , 8: 54-63.                                                                                                                        | Duplicates                            |
| Nolte, C. H., A. Rakow, B. Landes-Fritzsche, H. Audebert, and P. U. Heuschmann. 2011. 'Improving stroke patients' satisfaction with their education about their disease', <i>Cerebrovascular Diseases</i> , 2): 76.                                                                                              | Outcome: Preferences not addressed    |
| Norberg, E. B., K. Boman, B. Lofgren, and M. Brannstrom. 2014. 'Occupational performance and strategies for managing daily life among the elderly with heart failure', <i>Scand J Occup Ther</i> , 21: 392-9.                                                                                                    | Outcome: Preferences not addressed    |
| Norman, J., E. Phillips, and P. Mehta. 2013. 'Clinician and patient perspective in treatment decisions in MDS', <i>Leukemia Research</i> , 1): S96-S97.                                                                                                                                                          | Outcome: Preferences not addressed    |
| Noroxe, K. B., G. Moth, H. T. Maindal, and P. Vedsted. 2013. 'Could the patient have been seen by a nurse; a questionnaire based survey of GP and patient views in Danish general practice', <i>BMC Fam Pract</i> , 14: 171.                                                                                     | Population: Not multimorbid           |
| O'Hare, A. M., M. K. Song, M. Kurella Tamura, and A. H. Moss. 2017. 'Research priorities for palliative care for older adults with advanced chronic kidney disease', <i>Journal of Palliative Medicine</i> , 20: 453-60.                                                                                         | Document type: Editorials & reviews   |

|                                                                                                                                                                                                                                                                         |                                                                                                                                                                                                                                                                                                                                                   |                                       |
|-------------------------------------------------------------------------------------------------------------------------------------------------------------------------------------------------------------------------------------------------------------------------|---------------------------------------------------------------------------------------------------------------------------------------------------------------------------------------------------------------------------------------------------------------------------------------------------------------------------------------------------|---------------------------------------|
| 1<br>2<br>3<br>4<br>5<br>6<br>7<br>8<br>9<br>10<br>11<br>12<br>13<br>14<br>15<br>16<br>17<br>18<br>19<br>20<br>21<br>22<br>23<br>24<br>25<br>26<br>27<br>28<br>29<br>30<br>31<br>32<br>33<br>34<br>35<br>36<br>37<br>38<br>39<br>40<br>41<br>42<br>43<br>44<br>45<br>46 | Older patients with multiple chronic conditions desire personalized care plans from their providers. AHRQ Research Activities 2009;(344):16-16                                                                                                                                                                                                    | No full-text available                |
|                                                                                                                                                                                                                                                                         | Olsson, K., U. Naslund, J. Nilsson, and A. Hornsten. 2016. 'Patients' Decision Making About Undergoing Transcatheter Aortic Valve Implantation for Severe Aortic Stenosis', The Journal of cardiovascular nursing, 31: 523-28.                                                                                                                    | Population: Not multimorbid           |
|                                                                                                                                                                                                                                                                         | Olveira, G., M. A. Martinez-Olmos, B. F. De Bobadilla, M. Ferrer, N. Virgili, B. Vega, M. Blanco, M. Layola, L. Lizan, and I. Gozalbo. 2018. 'Patients' and professionals' preferences in terms of the attributes of home enteral nutrition products in Spain. A discrete choice experiment', European Journal of Clinical Nutrition, 72: 272-80. | Population: Not multimorbid           |
|                                                                                                                                                                                                                                                                         | Olveira, G., M. A. Martinez-Olmos, B. Fernandez De Bobadilla, M. Ferrer, N. Virgili, B. Vega, M. Blanco, M. Layola, L. Lizan, and M. Tribaldos De Suarez. 2016. 'Preferences for the characteristics of home enteral nutrition (HEN) via tube feeding: A discrete-choice experiment', Value in Health, 19 (7): A472.                              | Document type: Conference proceedings |
|                                                                                                                                                                                                                                                                         | O'Malley, P. G., J. Hanson, D. Becher, and J. L. Jackson. 2012. 'Patient and physician concordance on perceived degree of shared decision making of the same medical encounter', Journal of General Internal Medicine, 2): S264.                                                                                                                  | Document type: Conference proceedings |
|                                                                                                                                                                                                                                                                         | O'Neal, Erica L., Jared R. Adams, Gregory J. McHugo, Aricca D. Van Citters, Robert E. Drake, and Stephen J. Bartels. 2008. 'Preferences of older and younger adults with serious mental illness for involvement in decision-making in medical and psychiatric settings', American Journal of Geriatric Psychiatry, 16: 826-33.                    | Population: Age <60 yrs.              |
|                                                                                                                                                                                                                                                                         | O'Neill, T., C. Jinks, and B. N. Ong. 2007. 'Decision-making regarding total knee replacement surgery: a qualitative meta-synthesis', BMC Health Services Research, 7: 52.                                                                                                                                                                        | Outcome: Preferences not addressed    |
|                                                                                                                                                                                                                                                                         | Ortiz, D. V., R. O. Martinez, and D. V. Espino. 2015. 'Framing Effects on End-of-Life Preferences Among Latino Elders', Social Work in Health Care, 54: 708-24.                                                                                                                                                                                   | Population: Not multimorbid           |
|                                                                                                                                                                                                                                                                         | Osse, B. H., M. J. Vernooij, E. Schade, and R. P. Grol. 2004. 'Towards a new clinical tool for needs assessment in the palliative care of cancer patients: the PNP instrument', Journal of Pain & Symptom Management, 28: 329-41.                                                                                                                 | Population: Age <60 yrs.              |
|                                                                                                                                                                                                                                                                         | Ouanes, I., N. Stambouli, F. Dachraoui, L. Ouanes-Besbes, S. Toumi, F. B. Salem, M. Gahbiche, and F. Abroug. 2012. 'Pattern of end-of-life decisions in two Tunisian intensive care units: The role of culture and intensivists' training', Intensive Care Medicine, 38: 710-17.                                                                  | Population: Not multimorbid           |
|                                                                                                                                                                                                                                                                         | Ozdemir, S., C. Malhotra, T. Jafar, L. Choong, and E. Finkelstein. 2016. 'Preferences for treatment of end-stage renal disease among elderly patients and caregivers in a multi-ethnic population in Singapore', Journal of Pain and Symptom Management, 52 (6): e110-e11.                                                                        | Document type: Conference proceedings |
|                                                                                                                                                                                                                                                                         | Panocchia, N., M. Bossola, and L. Tazza. 2014. 'Decision-making in the implementation or withdrawal of dialysis in the old complex patient', Italian Journal of Medicine, 8: 6-10.                                                                                                                                                                | Document type: Editorials & reviews   |

|                                                                                                                                                                                                                                                                                                                                                                                                                                                                                             |                                       |
|---------------------------------------------------------------------------------------------------------------------------------------------------------------------------------------------------------------------------------------------------------------------------------------------------------------------------------------------------------------------------------------------------------------------------------------------------------------------------------------------|---------------------------------------|
| Paskins, Z., T. Sanders, P. R. Croft, and A. B. Hassell. 2015. 'The Identity Crisis of Osteoarthritis in General Practice: A Qualitative Study Using Video-Stimulated Recall', <i>Annals of Family Medicine</i> , 13: 537-44.                                                                                                                                                                                                                                                               | Outcome: Preferences not addressed    |
| Patel, M. J., M. S. Khan, F. Ali, Z. Kazmi, T. Riaz, S. Awan, and A. L. Sorathia. 2013. 'Patients' Insight of Interpreting Prescriptions and Drug Labels - A Cross Sectional Study', <i>PLoS ONE</i> , 8 (6) (no pagination).                                                                                                                                                                                                                                                               | Outcome: Preferences not addressed    |
| Patel, M., R. Ferris, and C. S. Blaum. 2017. 'Building an evidence base for patient goals directed aligned care: An analysis of the health and retirement study', <i>Journal of the American Geriatrics Society</i> , 65 (Supplement 1): S139.                                                                                                                                                                                                                                              | Document type: Conference proceedings |
| Paterson, B., S. Thorne, and C. Russell. 2002. 'Disease-specific influences on meaning and significance in self-care decision-making in chronic illness', <i>The Canadian journal of nursing research = Revue canadienne de recherche en sciences infirmieres</i> , 34: 61-74.                                                                                                                                                                                                              | Population: Not multimorbid           |
| Patton, D., C. Hughes, C. A. Cadogan, J. Francis, G. J. Gormley, N. Kerse, P. Passmore, and C. Ryan. 2015. 'Using the Theoretical Domains Framework (TDF) to explore barriers and facilitators to adherence to prescribed medicines in community-based older adults', <i>International Journal of Pharmacy Practice</i> , 2): 11-12.                                                                                                                                                        | Document type: Conference proceedings |
| Paxton, R. J., P. Nayak, W. C. Taylor, S. Chang, K. S. Courneya, L. Schover, K. Hodges, and L. A. Jones. 2014. 'African-American breast cancer survivors' preferences for various types of physical activity interventions: a Sisters Network Inc. web-based survey', <i>Journal of Cancer Survivorship</i> , 8: 31-8.                                                                                                                                                                      | Population: Age <60 yrs.              |
| Payne, S., S. Hawker, C. Kerr, D. Seamark, H. Roberts, N. Jarrett, and H. Smith. 2007. 'Experiences of end-of-life care in community hospitals', <i>Health Soc Care Community</i> , 15: 494-501.                                                                                                                                                                                                                                                                                            | Outcome: Preferences not addressed    |
| Peeters, P., W. Van Biesen, N. Veys, W. Lemahieu, B. De Moor, and J. De Meester. 2016. 'External Validation of a risk stratification model to assist shared decision making for patients starting renal replacement therapy', <i>BMC Nephrology</i> , 17 (1) (no pagination).                                                                                                                                                                                                               | Outcome: Preferences not addressed    |
| Petersen, J. J., M. A. Paulitsch, K. Mergenthal, J. Gensichen, H. Hansen, S. Weyerer, S. G. Riedel-Heller, A. Fuchs, W. Maier, H. Bickel, H. H. Konig, B. Wiese, H. van den Bussche, M. Scherer, A. Dahlhaus, and Grp MultiCare Study. 2014. 'Implementation of chronic illness care in German primary care practices - how do multimorbid older patients view routine care? A cross-sectional study using multilevel hierarchical modeling', <i>BMC Health Services Research</i> , 14: 10. | Outcome: Preferences not addressed    |
| Piamjariyakul, U., C. E. Smith, M. Werkowitch, and A. Elyachar. 2012. 'Part I: heart failure home management: patients, multidisciplinary health care professionals and family caregivers' perspectives', <i>Appl Nurs Res</i> , 25: 239-45.                                                                                                                                                                                                                                                | Population: Age <60 yrs.              |
| Piccoli, G. B., M. Nazha, I. Capizzi, F. N. Vigotti, S. Scognamiglio, V. Consiglio, E. Mongilardi, M. Bilocati, P. Avagnina, and E. Versino. 2016. 'Diet as a system: an observational study investigating a multi-choice system of moderately restricted low-protein diets', <i>BMC Nephrology</i> , 17: 1-11.                                                                                                                                                                             | Outcome: Preferences not addressed    |
| Pieters, H. C., M. V. Heilemann, M. Grant, and R. C. Maly. 2011. 'Older women's reflections on accessing care across their breast cancer trajectory: navigating beyond the triple barriers', <i>Oncology Nursing Forum</i> , 38: 175-84.                                                                                                                                                                                                                                                    | Population: Not multimorbid           |

|                                                                                                                                                                                                                                                                                                                                                                                                                                                                         |                                                |
|-------------------------------------------------------------------------------------------------------------------------------------------------------------------------------------------------------------------------------------------------------------------------------------------------------------------------------------------------------------------------------------------------------------------------------------------------------------------------|------------------------------------------------|
| <p>Pileckyte, R., T. Zvirblis, V. Ivanauskaite, I. Klimiene, and L. Griskevicius. 2013. 'Chronic lymphocytic leukemia (CLL): Epidemiology, comorbidities and treatment preference in daily clinical practice', <i>Haematologica</i>, 1): 546.</p>                                                                                                                                                                                                                       | <p>Population: Not multimorbid</p>             |
| <p>Plouvier, A. O. A., T. C. O. Hartman, C. E. M. Verhulst, B. R. Bloem, C. van Weel, and A. L. M. Lagro-Janssen. 2017. 'Parkinson's disease: Patient and general practitioner perspectives on the role of primary care', <i>Family Practice</i>, 34: 227-33.</p>                                                                                                                                                                                                       | <p>Population: Not multimorbid</p>             |
| <p>Politi, M. C., N. George, T. Li, K. M. Korenblat, K. J. Fowler, C. Ho, A. Liapakis, D. Roth, and J. Yee. 2018. 'Project HELP: a study protocol to pilot test a shared decision-making tool about treatment options for patients with hepatitis C and chronic kidney disease', <i>Pilot &amp; Feasibility Studies</i>, 4: 55.</p>                                                                                                                                     | <p>Document type: Study protocols</p>          |
| <p>Pollard, A., C. Llewellyn, V. Cooper, M. Sachikonye, N. Perry, E. Nixon, A. Miners, E. Youssef, and C. Sabin. 2018. 'Patients' perspectives on the development of HIV services to accommodate ageing with HIV: a qualitative study', <i>International Journal of STD and AIDS</i>, 29: 483-90.</p>                                                                                                                                                                   | <p>Population: Age &lt;60 yrs.</p>             |
| <p>Porras, C. J. 2016. 'Proposal of practical "patient based model" for decision making in critical limb ischemia (CLI) patients', <i>Vascular</i>, 24 (1 Supplement 1): 64.</p>                                                                                                                                                                                                                                                                                        | <p>Outcome: Preferences not addressed</p>      |
| <p>Protheroe, J., T. Fahey, A. A. Montgomery, and T. J. Peters. 2000. 'The impact of patients' preferences on the treatment of atrial fibrillation: Observational study of patient based decision analysis', <i>British Medical Journal</i>, 320: 1380-84.</p>                                                                                                                                                                                                          | <p>Population: Not multimorbid</p>             |
| <p>Protheroe, J., T. Fahey, A. A. Montgomery, and T. J. Peters. 2001. 'Effects of patients' preferences on the treatment of atrial fibrillation: Observational study of patient-based decision analysis', <i>Western Journal of Medicine</i>, 174: 311-15.</p>                                                                                                                                                                                                          | <p>Duplicates</p>                              |
| <p>Pujahari, A. K. 2016. 'Day care vs overnight stay after laparoscopic cholecystectomy even with co-morbidity and a possible second surgery: A patient's choice', <i>Journal of Clinical and Diagnostic Research</i>, 10: PC25-PC27.</p>                                                                                                                                                                                                                               | <p>Population: Age &lt;60 yrs.</p>             |
| <p>Puts, M. T. E., B. Tapscott, M. Fitch, D. Howell, J. Monette, D. Wan-Chow-Wah, M. Krzyzanowska, N. B. Leighl, E. Springall, and S. M. Alibhai. 2015. 'A systematic review of factors influencing older adults' decision to accept or decline cancer treatment', <i>Cancer Treatment Reviews</i>, 41: 197-215.</p>                                                                                                                                                    | <p>Document type: Editorials &amp; reviews</p> |
| <p>Puts, M. T., B. Tapscott, M. Fitch, D. Howell, J. Monette, D. Wan-Chow-Wah, M. K. Krzyzanowska, N. B. Leighl, E. Springall, and S. M. Alibhai. 2015. 'A systematic review of factors influencing older adults' hypothetical treatment decisions', <i>European Oncology and Haematology</i>, 11: 19-33.</p>                                                                                                                                                           | <p>Document type: Editorials &amp; reviews</p> |
| <p>Puts, M., S. Novak, D. Howell, M. Fitch, M. Krzyzanowska, N. Leighl, J. Monette, D. Wan-Chow-Wah, E. Springall, and S. M. H. Alibhai. 2013. 'A systematic review of factors influencing older adults' decision to accept or refuse cancer treatment', <i>Supportive Care in Cancer</i>, 1): S202.</p>                                                                                                                                                                | <p>Outcome: Preferences not addressed</p>      |
| <p>Puts, M., S. Sattar, K. McWatters, K. Lee, M. Kulik, M. E. Macdonald, R. W. J. Jang, E. Amir, M. K. Krzyzanowska, N. B. Leighl, M. Fitch, A. M. Joshua, P. R. Warde, A. Tourangeau, and S. M. H. Alibhai. 2016. 'What is the role of comorbidity, frailty, and functional status in the decision-making process for older adults with cancer and their family members, oncologists, and family physician?', <i>Journal of Clinical Oncology. Conference</i>, 34.</p> | <p>Duplicates</p>                              |

|                                                                                                                                                                                                                                                                                                                                                                                                                                                  |                                       |
|--------------------------------------------------------------------------------------------------------------------------------------------------------------------------------------------------------------------------------------------------------------------------------------------------------------------------------------------------------------------------------------------------------------------------------------------------|---------------------------------------|
| <p>Puts, M., S. Sattar, K. McWatters, K. Lee, M. Kulik, M. E. MacDonald, R. Jang, E. Amir, M. Krzyzanowska, N. Leighl, M. Fitch, A. Joshua, P. Warde, A. Tourangeau, and S. Alibhai. 2016. 'What is the role of comorbidity, frailty and functional status in treatment decision-making for older cancer patients and their family members, oncologists, and family physician?', <i>Supportive Care in Cancer</i>, 24 (1 Supplement 1): S45.</p> | Document type: Conference proceedings |
| <p>Quensell, M. L., D. A. Taira, T. B. Seto, K. L. Braun, and T. L. Sentell. 2017. "'I Need my Own Place to get Better": Patient Perspectives on the Role of Housing in Potentially Preventable Hospitalizations', <i>Journal of Health Care for the Poor &amp; Underserved</i>, 28: 784-97.</p>                                                                                                                                                 | Outcome: Preferences not addressed    |
| <p>Radcliff, T. A., M. J. Cote, D. L. Olson, and D. Liebrecht. 2012. 'Rehabilitation Settings After Joint Replacement: An Application of Multiattribute Preference Elicitation', <i>Evaluation and the Health Professions</i>, 35: 182-98.</p>                                                                                                                                                                                                   | Population: Not multimorbid           |
| <p>Rahemi, Z., and C. L. Williams. 2016. 'Older Adults of Underrepresented Populations and Their End-of-Life Preferences An Integrative Review', <i>Advances in Nursing Science</i>, 39: E1-E29.</p>                                                                                                                                                                                                                                             | Document type: Editorials & reviews   |
| <p>Ralphs-Thibodeau, S., F. Knoefel, K. Benjamin, A. Leclerc, S. Pisterman, J. Sohmer, and C. Scrim. 2006. 'Patient choice: An influencing factor on policy-related research to decrease bedrail use as physical restraint', <i>Worldviews on Evidence-Based Nursing</i>, 3: 31-39.</p>                                                                                                                                                          | Outcome: Preferences not addressed    |
| <p>Ramages, M., and G. Cheung. 2018. 'Why do older people refuse resuscitation? A qualitative study examining retirement village residents' resuscitation decisions', <i>Psychogeriatrics</i>, 18: 49-56.</p>                                                                                                                                                                                                                                    | Population: Not multimorbid           |
| <p>Rao, A., F. Caskey, Y. Ben-Shlomo, and L. Biddle. 2016. 'Understanding patients' perspectives influencing participation within equal study in UK-a qualitative study', <i>Nephrology Dialysis Transplantation</i>, 1): i552.</p>                                                                                                                                                                                                              | Outcome: Preferences not addressed    |
| <p>Raven, M. C., C. C. Gillespie, R. DiBennardo, K. Van Busum, and B. Elbel. 2012. 'Vulnerable patients' perceptions of health care quality and quality data', <i>Medical decision making : an international journal of the Society for Medical Decision Making</i>, 32: 311-26.</p>                                                                                                                                                             | Population: Age <60 yrs.              |
| <p>Reeve, E., L. F. Low, and S. N. Hilmer. 2016. 'Beliefs and attitudes of older adults and carers about deprescribing of medications: a qualitative focus group study', <i>British Journal of General Practice</i>, 66: e552-60.</p>                                                                                                                                                                                                            | Outcome: Preferences not addressed    |
| <p>Reeve, E., S. Shakib, I. Hendrix, M. S. Roberts, and M. D. Wiese. 2014. 'Review of deprescribing processes and development of an evidence-based, patient-centred deprescribing process', <i>British Journal of Clinical Pharmacology</i>, 78: 738-47.</p>                                                                                                                                                                                     | Document type: Editorials & reviews   |
| <p>Richter, D., J. Ernst, C. Lehmann, U. Koch, A. Mehnert, and M. Friedrich. 2015. 'Communication Preferences in Young, Middle-Aged, and Elderly Cancer Patients', <i>Oncology Research and Treatment</i>, 38: 590-5.</p>                                                                                                                                                                                                                        | Population: Not multimorbid           |
| <p>Ridgeway, J. L., J. S. Egginton, K. Tiedje, M. Linzer, D. Boehm, S. Poplau, D. R. de Oliveira, L. Odell, V. M. Montori, and D. T. Eton. 2014. 'Factors that lessen the burden of treatment in complex patients with chronic conditions: A qualitative study', <i>Patient Preference and Adherence</i>, 8: 339-51.</p>                                                                                                                         | Population: Age <60 yrs.              |
| <p>Riegel, B., V. V. Dickson, and M. Topaz. 2013. 'Qualitative analysis of naturalistic decision making in adults with chronic heart failure', <i>Nurs Res</i>, 62: 91-8.</p>                                                                                                                                                                                                                                                                    | Outcome: Preferences not addressed    |



|    |                                                                                                                                                                                                                                                                                                                                             |                                       |
|----|---------------------------------------------------------------------------------------------------------------------------------------------------------------------------------------------------------------------------------------------------------------------------------------------------------------------------------------------|---------------------------------------|
| 1  | Riffin, C., P. H. Van Ness, and T. Fried. 2017. 'Patient and caregiver perspectives on managing multiple health conditions', <i>Journal of the American Geriatrics Society</i> , 65 (Supplement 1): S183-S84.                                                                                                                               | Document type: Conference proceedings |
| 2  |                                                                                                                                                                                                                                                                                                                                             |                                       |
| 3  |                                                                                                                                                                                                                                                                                                                                             |                                       |
| 4  | Romo, Rafael Diaz. 2014. 'Decision Making Among Older Adults with a Limited Prognosis', Ph.D.: 162 p-62 p.                                                                                                                                                                                                                                  | Document type: Conference proceedings |
| 5  |                                                                                                                                                                                                                                                                                                                                             |                                       |
| 6  | Rood, J. A., F. J. van Zuuren, F. Stam, T. van der Ploeg, C. Eeltink, I. M. Verdonck-de Leeuw, and P. C. Huijgens. 2015. 'Perceived need for information among patients with a haematological malignancy: associations with information satisfaction and treatment decision-making preferences', <i>Hematological Oncology</i> , 33: 85-98. | Population: Not multimorbid           |
| 7  |                                                                                                                                                                                                                                                                                                                                             |                                       |
| 8  | Rosstad, T., H. Garasen, A. Steinsbekk, O. Sletvold, and A. Grimsmo. 2013. 'Development of a patient-centred care pathway across healthcare providers: a qualitative study', <i>BMC Health Services Research</i> , 13: 121.                                                                                                                 | Outcome: Preferences not addressed    |
| 9  |                                                                                                                                                                                                                                                                                                                                             |                                       |
| 10 | Roth, K., J. Lynn, Z. Zhong, M. Borum, and N. V. Dawson. 2000. 'Dying with end stage liver disease with cirrhosis: insights from SUPPORT. Study to Understand Prognoses and Preferences for Outcomes and Risks of Treatment', <i>Journal of the American Geriatrics Society</i> , 48: S122-30.                                              | Population: Age <60 yrs.              |
| 11 |                                                                                                                                                                                                                                                                                                                                             |                                       |
| 12 | Roy, A. N., S. S. Madhavan, and A. Lloyd. 2015. 'A Discrete Choice Experiment to Elicit Patient Willingness to Pay for Attributes of Treatment-Induced Symptom Relief in Comorbid. Insomnia', <i>Managed care (Langhorne, Pa.)</i> , 24: 42-48.                                                                                             | Population: Age <60 yrs.              |
| 13 |                                                                                                                                                                                                                                                                                                                                             |                                       |
| 14 | Ruggiano, N., and D. Edvardsson. 2013. 'Person-Centeredness in Home- and Community-Based Long-Term Care: Current Challenges and New Directions', <i>Social Work in Health Care</i> , 52: 846-61.                                                                                                                                            | Document type: Editorials & reviews   |
| 15 |                                                                                                                                                                                                                                                                                                                                             |                                       |
| 16 | Ruland, C. M. 1998. 'Integrating patient preferences for self-care capability in nursing care: effects on nurses' care priorities and patient outcomes', Ph.D.: 255 p-55 p.                                                                                                                                                                 | Document type: Conference proceedings |
| 17 |                                                                                                                                                                                                                                                                                                                                             |                                       |
| 18 | Rutecki, G. W., L. Rodriguez, A. Cugino, D. Jarjoura, F. Hastings, and F. C. Whittier. 1994. 'End of life issues in ESRD: A study of three decision variables that affect patient attitudes', <i>ASAIO Journal</i> , 40: M798-M802.                                                                                                         | Outcome: Preferences not addressed    |
| 19 |                                                                                                                                                                                                                                                                                                                                             |                                       |
| 20 | Ryoo, J. J., D. L. Ordin, A. L. M. Antonio, S. M. Oishi, M. K. Gould, S. M. Asch, and J. L. Malin. 2013. 'Patient preference and contraindications in measuring quality of care: What do administrative data miss?', <i>Journal of Clinical Oncology</i> , 31: 2716-23.                                                                     | Population: Not multimorbid           |
| 21 |                                                                                                                                                                                                                                                                                                                                             |                                       |
| 22 | Sales, C., R. Tavares, L. Amado, P. Martins, J. Barros, V. Miranda, A. Santos-Silva, P. Mena-Matos, and E. Costa. 2017. 'Being here is a prison: Patient reported quality of life burdens associated to dialysis', <i>Nephrology Dialysis Transplantation</i> , 32 (Supplement 3): iii713.                                                  | Outcome: Preferences not addressed    |
| 23 |                                                                                                                                                                                                                                                                                                                                             |                                       |
| 24 | Samalin, L., J. B. Genty, L. Boyer, J. Lopez-Castroman, M. Abbar, and P. M. Llorca. 2018. 'Shared Decision-Making: a Systematic Review Focusing on Mood Disorders', <i>Current Psychiatry Reports</i> , 20: 11.                                                                                                                             | Population: Age <60 yrs.              |
| 25 |                                                                                                                                                                                                                                                                                                                                             |                                       |
| 26 | Sanchez-Ballester, F., P. Miranda, I. Lizarraga, J. Rejas, and D. Arumi. 2014. 'Therapeutic benefit in patients switching tolterodine to other novel antimuscarinic agents', <i>Actas urologicas espanolas</i> , 38: 156-63.                                                                                                                | Outcome: Preferences not addressed    |
| 27 |                                                                                                                                                                                                                                                                                                                                             |                                       |
| 28 |                                                                                                                                                                                                                                                                                                                                             |                                       |
| 29 |                                                                                                                                                                                                                                                                                                                                             |                                       |
| 30 |                                                                                                                                                                                                                                                                                                                                             |                                       |
| 31 |                                                                                                                                                                                                                                                                                                                                             |                                       |
| 32 |                                                                                                                                                                                                                                                                                                                                             |                                       |
| 33 |                                                                                                                                                                                                                                                                                                                                             |                                       |
| 34 |                                                                                                                                                                                                                                                                                                                                             |                                       |
| 35 |                                                                                                                                                                                                                                                                                                                                             |                                       |
| 36 |                                                                                                                                                                                                                                                                                                                                             |                                       |
| 37 |                                                                                                                                                                                                                                                                                                                                             |                                       |
| 38 |                                                                                                                                                                                                                                                                                                                                             |                                       |
| 39 |                                                                                                                                                                                                                                                                                                                                             |                                       |
| 40 |                                                                                                                                                                                                                                                                                                                                             |                                       |
| 41 |                                                                                                                                                                                                                                                                                                                                             |                                       |
| 42 |                                                                                                                                                                                                                                                                                                                                             |                                       |
| 43 |                                                                                                                                                                                                                                                                                                                                             |                                       |
| 44 |                                                                                                                                                                                                                                                                                                                                             |                                       |
| 45 |                                                                                                                                                                                                                                                                                                                                             |                                       |
| 46 |                                                                                                                                                                                                                                                                                                                                             |                                       |

|    |                                                                                                                                                                                                                                                                                                                                                                                                                                                           |                                    |
|----|-----------------------------------------------------------------------------------------------------------------------------------------------------------------------------------------------------------------------------------------------------------------------------------------------------------------------------------------------------------------------------------------------------------------------------------------------------------|------------------------------------|
| 1  | Sattar, S., S. M. H. Alibhai, M. Fitch, M. Krzyzanowska, N. Leighl, and M. T. E. Puts. 2018. 'Chemotherapy and radiation treatment decision-making experiences of older adults with cancer: A qualitative study', <i>Journal of Geriatric Oncology</i> , 9: 47-52.                                                                                                                                                                                        | Population: Not multimorbid        |
| 2  |                                                                                                                                                                                                                                                                                                                                                                                                                                                           |                                    |
| 3  |                                                                                                                                                                                                                                                                                                                                                                                                                                                           |                                    |
| 4  | Saunders, C. H., G. Elwyn, K. Kirkland, and M. A. Durand. 2018. 'Serious Choices: A Protocol for an Environmental Scan of Patient Decision Aids for Seriously Ill People at Risk of Death Facing Choices about Life-Sustaining Treatments', 11: 97-106.                                                                                                                                                                                                   | Outcome: Preferences not addressed |
| 5  |                                                                                                                                                                                                                                                                                                                                                                                                                                                           |                                    |
| 6  | Schaarschmidt, M. L., C. Kromer, R. Herr, A. Schmieder, D. Sonntag, S. Goerdts, and W. K. Peitsch. 2015. 'Patient preferences for biologicals in psoriasis: Top priority of safety for cardiovascular patients', <i>PLoS ONE</i> , 10 (12) (no pagination).                                                                                                                                                                                               | Population: Age <60 yrs.           |
| 7  |                                                                                                                                                                                                                                                                                                                                                                                                                                                           |                                    |
| 8  | Schaarschmidt, M. L., C. Kromer, R. Herr, A. Schmieder, S. Goerdts, and W. K. Peitsch. 2015. 'Patient preferences for treatment of psoriasis with biologicals: A discrete choice experiment', <i>Experimental Dermatology</i> , 24 (3): E18.                                                                                                                                                                                                              | Population: Age <60 yrs.           |
| 9  |                                                                                                                                                                                                                                                                                                                                                                                                                                                           |                                    |
| 10 | Schers, H., S. Webster, H. Van Den Hoogen, A. Avery, R. Grol, and W. Van Den Bosch. 2002. 'Continuity of care in general practice: A survey of patients' views', <i>British Journal of General Practice</i> , 52: 459-62.                                                                                                                                                                                                                                 | Population: Age <60 yrs.           |
| 11 |                                                                                                                                                                                                                                                                                                                                                                                                                                                           |                                    |
| 12 | Schmidt, H., S. Boese, K. Lampe, K. Jordan, E. Fiedler, U. Muller-Werdan, and D. Vordermark. 2018. 'Trans sectoral care of geriatric cancer patients - Results of a multicenter study to pilot test a patient-centered interdisciplinary care concept (PIVOG)', <i>Oncology Research and Treatment</i> , 41 (Supplement 1): 81-82.                                                                                                                        | Outcome: Preferences not addressed |
| 13 |                                                                                                                                                                                                                                                                                                                                                                                                                                                           |                                    |
| 14 | Schmidt, H., S. Boese, K. Lampe, K. Jordan, E. Fiedler, U. Muller-Werdan, A. Wienke, and D. Vordermark. 2017. 'Trans sectoral care of geriatric cancer patients based on comprehensive geriatric assessment and patient-reported quality of life - Results of a multicenter study to develop and pilot test a patient-centered interdisciplinary care concept for geriatric oncology patients (PIVOG)', <i>Journal of Geriatric Oncology</i> , 8: 262-70. | Outcome: Preferences not addressed |
| 15 |                                                                                                                                                                                                                                                                                                                                                                                                                                                           |                                    |
| 16 | Schmieder, A., M. L. Schaarschmidt, N. Umar, D. D. Terris, M. Goebeler, S. Goerdts, and W. K. Peitsch. 2012. 'Comorbidities significantly impact patients' preferences for psoriasis treatments', <i>Journal of the American Academy of Dermatology</i> , 67: 363-72.                                                                                                                                                                                     | Population: Age <60 yrs.           |
| 17 |                                                                                                                                                                                                                                                                                                                                                                                                                                                           |                                    |
| 18 | Schmocker, R. K., S. E. Holden, X. Vang, G. E. Levenson, L. M. Cherney Stafford, and E. R. Winslow. 2015. 'Association of Patient-Reported Readiness for Discharge and Hospital Consumer Assessment of Health Care Providers and Systems Patient Satisfaction Scores: A Retrospective Analysis', <i>Journal of the American College of Surgeons</i> , 221: 1073-82.e3.                                                                                    | Outcome: Preferences not addressed |
| 19 |                                                                                                                                                                                                                                                                                                                                                                                                                                                           |                                    |
| 20 | Schneider, A., T. Korner, M. Mehring, M. Wensing, G. Elwyn, and J. Szecsenyi. 2006. 'Impact of age, health locus of control and psychological co-morbidity on patients' preferences for shared decision making in general practice', <i>Patient Education and Counseling</i> , 61: 292-98.                                                                                                                                                                | Population: Age <60 yrs.           |
| 21 |                                                                                                                                                                                                                                                                                                                                                                                                                                                           |                                    |
| 22 | Schoenberg, N. E., S. H. Bardach, K. N. Manchikanti, and A. C. Goodenow. 2011. 'Appalachian residents' experiences with and management of multiple morbidity', <i>Qual Health Res</i> , 21: 601-11.                                                                                                                                                                                                                                                       | Population: Age <60 yrs.           |
| 23 |                                                                                                                                                                                                                                                                                                                                                                                                                                                           |                                    |
| 24 | Schoenborn, N., C. Boyd, M. McNabney, A. Ray, and D. Cayea. 2014. 'Current practices and opportunities in a resident clinic caring for older adults with multimorbidity', <i>Journal of the American Geriatrics Society</i> , 1): S4.                                                                                                                                                                                                                     | Duplicates                         |
| 25 |                                                                                                                                                                                                                                                                                                                                                                                                                                                           |                                    |
| 26 |                                                                                                                                                                                                                                                                                                                                                                                                                                                           |                                    |
| 27 |                                                                                                                                                                                                                                                                                                                                                                                                                                                           |                                    |
| 28 |                                                                                                                                                                                                                                                                                                                                                                                                                                                           |                                    |
| 29 |                                                                                                                                                                                                                                                                                                                                                                                                                                                           |                                    |
| 30 |                                                                                                                                                                                                                                                                                                                                                                                                                                                           |                                    |
| 31 |                                                                                                                                                                                                                                                                                                                                                                                                                                                           |                                    |
| 32 |                                                                                                                                                                                                                                                                                                                                                                                                                                                           |                                    |
| 33 |                                                                                                                                                                                                                                                                                                                                                                                                                                                           |                                    |
| 34 |                                                                                                                                                                                                                                                                                                                                                                                                                                                           |                                    |
| 35 |                                                                                                                                                                                                                                                                                                                                                                                                                                                           |                                    |
| 36 |                                                                                                                                                                                                                                                                                                                                                                                                                                                           |                                    |
| 37 |                                                                                                                                                                                                                                                                                                                                                                                                                                                           |                                    |
| 38 |                                                                                                                                                                                                                                                                                                                                                                                                                                                           |                                    |
| 39 |                                                                                                                                                                                                                                                                                                                                                                                                                                                           |                                    |
| 40 |                                                                                                                                                                                                                                                                                                                                                                                                                                                           |                                    |
| 41 |                                                                                                                                                                                                                                                                                                                                                                                                                                                           |                                    |
| 42 |                                                                                                                                                                                                                                                                                                                                                                                                                                                           |                                    |
| 43 |                                                                                                                                                                                                                                                                                                                                                                                                                                                           |                                    |
| 44 |                                                                                                                                                                                                                                                                                                                                                                                                                                                           |                                    |
| 45 |                                                                                                                                                                                                                                                                                                                                                                                                                                                           |                                    |
| 46 |                                                                                                                                                                                                                                                                                                                                                                                                                                                           |                                    |

|                       |                                                                                                                                                                                                                                                                                                 |                                       |
|-----------------------|-------------------------------------------------------------------------------------------------------------------------------------------------------------------------------------------------------------------------------------------------------------------------------------------------|---------------------------------------|
| 1<br>2<br>3<br>4<br>5 | Schonwetter, R. S., R. M. Walker, M. Solomon, A. Indurkha, and B. E. Robinson. 1996. 'Life values, resuscitation preferences, and the applicability of living wills in an older population', <i>Journal of the American Geriatrics Society</i> , 44: 954-58.                                    | Population: Not multimorbid           |
| 6<br>7                | Schuling, J., R. Sytema, and A. J. Berendsen. 2013. '[Adjusting medication: elderly patient's preference counts]', <i>Ned Tijdschr Geneeskd</i> , 157: A6491.                                                                                                                                   | Document type: Editorials & reviews   |
| 8<br>9                | Schuling, J., R. Sytema, and A. J. Berendsen. 2013. '[Adjusting medication: elderly patient's preference counts]', <i>Ned Tijdschr Geneeskd</i> , 157: A6491.                                                                                                                                   | Duplicates                            |
| 10<br>11<br>12        | Seematter-Bagnoud, L., J. Cornuz, and C. Bula. 2003. '[Screening and prevention in the elderly: which interventions should be proposed, to whom, and up to what age?]', <i>Revue medicale de la Suisse romande</i> , 123: 665-9.                                                                | Document type: Editorials & reviews   |
| 13<br>14<br>15        | Sehouli, J., E. M. Schooning, and S. Mahner. 2011. 'What do elderly patients prefer? - A prospective multicenter study of preference for oral or intravenous treosulfan in elderly patients with recurrent ovarian cancer', <i>Journal of Oncology Pharmacy Practice</i> , 17 (1): 10.          | Population: Not multimorbid           |
| 16<br>17<br>18        | Selten, E. M., J. E. Vrieseckolk, R. Geenen, W. H. van der Laan, R. G. van der Meulen-Dilling, M. W. Nijhof, H. J. Schers, and C. H. van den Ende. 2016. 'Reasons for Treatment Choices in Knee and Hip Osteoarthritis: A Qualitative Study', <i>Arthritis Care and Research</i> , 68: 1260-67. | Population: Age <60 yrs.              |
| 19<br>20<br>21        | Sendur, M. A., K. Silay, S. Aksoy, S. Ozbek, N. Ozdemir, and K. Altundag. 2016. 'Effect of polypharmacy on treatment preferences and outcome in older breast cancer patients', <i>Annals of Oncology</i> . Conference: 41st European Society for Medical Oncology Congress, ESMO, 27.           | Outcome: Preferences not addressed    |
| 22<br>23<br>24        | Sethares, K. A., C. Westlake, and J. Viveiros. 2017. 'Low literacy patients may prefer multi-modal patient education', <i>Journal of Cardiac Failure</i> , 23 (8 Supplement 1): S114.                                                                                                           | Document type: Conference proceedings |
| 25<br>26<br>27        | Sewitch, M. J., M. Abrahamowicz, P. L. Dobkin, and R. Tamblyn. 2003. 'Measuring differences between patients' and physicians' health perceptions: The Patient-Physician Discordance Scale', <i>Journal of Behavioral Medicine</i> , 26: 245-64.                                                 | Population: Age <60 yrs.              |
| 28<br>29              | Seymour, J. 2007. 'Needs and preferences of patients with diseases other than cancer: The UK experience', <i>Progress in Palliative Care</i> , 15: 108-12.                                                                                                                                      | Document type: Editorials & reviews   |
| 30<br>31              | Shadmi, E., C. M. Boyd, C. J. Hsiao, M. Sylvia, A. B. Schuster, and C. Boulton. 2006. 'Morbidity and older persons' perceptions of the quality of their primary care', <i>Journal of the American Geriatrics Society</i> , 54: 330-34.                                                          | Outcome: Preferences not addressed    |
| 32<br>33              | Sherbourne, C. D., R. Sturm, and K. B. Wells. 1999. 'What outcomes matter to patients?', <i>J Gen Intern Med</i> , 14: 357-63.                                                                                                                                                                  | Population: Age <60 yrs.              |
| 34<br>35              | Shigaki, C. L., C. Moore, B. Wakefield, J. Campbell, and J. LeMaster. 2010. 'Nurse partners in chronic illness care: patients' perceptions and their implications for nursing leadership', <i>Nursing administration quarterly</i> , 34: 130-40.                                                | Outcome: Preferences not addressed    |
| 36<br>37<br>38        | Shigemura, J., Y. Sato, A. Yoshino, and S. Nomura. 2008. 'Patient satisfaction with antidepressants: An Internet-based study', <i>Journal of Affective Disorders</i> , 107: 155-60.                                                                                                             | Population: Age <60 yrs.              |

|                                                                                                                                                                                                                                                                                                                                                                                                  |                                       |
|--------------------------------------------------------------------------------------------------------------------------------------------------------------------------------------------------------------------------------------------------------------------------------------------------------------------------------------------------------------------------------------------------|---------------------------------------|
| Sierra, J. A. I., and S. M. Calderon. 1997. 'Health and social services: Needs, preferences and their use by the elderly following hospitalisation. [Spanish]', <i>Revista Espanola de Salud Publica</i> , 71: 281-91.                                                                                                                                                                           | Population: Not multimorbid           |
| Singer, S. J., M. W. Friedberg, M. V. Kiang, T. Dunn, and D. M. Kuhn. 2013. 'Development and preliminary validation of the Patient Perceptions of Integrated Care survey', <i>Medical Care Research and Review</i> , 70: 143-64.                                                                                                                                                                 | Population: Age <60 yrs.              |
| Singh, Jasvinder A., Jeff A. Sloan, Pamela J. Atherton, Tenbroeck Smith, Thomas F. Hack, Mashele M. Huschka, Teresa A. Rummans, Matthew M. Clark, Brent Diekmann, and Lesley F. Degner. 2010. 'Preferred Roles in Treatment Decision Making Among Patients With Cancer: A Pooled Analysis of Studies Using the Control Preferences Scale', <i>American Journal of Managed Care</i> , 16: 688-96. | Document type: Editorials & reviews   |
| Siouta, Eleni, Ulla Hellström Muhli, Berith Hedberg, Anders Broström, Björn Fossum, and Klas Karlgren. 2016. 'Patients' experiences of communication and involvement in decision-making about atrial fibrillation treatment in consultations with nurses and physicians', <i>Scandinavian Journal of Caring Sciences</i> , 30: 535-46.                                                           | Population: Not multimorbid           |
| Skaperdas, E., A. Tuepker, C. Nicolaidis, J. K. Robb, D. Kansagara, and D. H. Hickam. 2014. 'Congestive heart failure self-management among US veterans: The role of personal and professional advocates', <i>Patient Educ Couns</i> , 95: 371-7.                                                                                                                                                | Outcome: Preferences not addressed    |
| Skelton, A. M., E. A. Murphy, R. J. L. Murphy, and T. C. O'Dowd. 1996. 'Patients' views of low back pain and its management in general practice', <i>British Journal of General Practice</i> , 46: 153-56.                                                                                                                                                                                       | Population: Age <60 yrs.              |
| Skilbeck, Julie Kathryn, Antony Arthur, and Jane Seymour. 2018. 'Making sense of frailty: An ethnographic study of the experience of older people living with complex health problems', <i>International Journal of Older People Nursing</i> , 13: 1-1.                                                                                                                                          | Outcome: Preferences not addressed    |
| Slightam, C. A., K. Brandt, E. C. Jenchura, E. T. Lewis, S. M. Asch, and D. M. Zulman. 2018. "'I had to change so much in my life to live with my new limitations": Multimorbid patients' descriptions of their most bothersome chronic conditions', <i>Chronic Illness</i> , 14: 13-24.                                                                                                         | Outcome: Preferences not addressed    |
| Snell, R., T. Langran, and P. Donyai. 2017. 'Patient views about polypharmacy medication review clinics run by clinical pharmacists in GP practices', <i>International Journal of Clinical Pharmacy</i> , 39: 1162-65.                                                                                                                                                                           | Outcome: Preferences not addressed    |
| Sobolewska, J., M. Szewczyk, M. Włodarczyk, A. Sobolewska, J. Kasprzyk, L. Dżiki, and A. Dżiki. 2015. 'Patient perceptions of physician performing the digital rectal examination', <i>United European Gastroenterology Journal</i> , 1): A583.                                                                                                                                                  | Document type: Conference proceedings |
| Solberg, L. I., S. E. Asche, L. H. Anderson, K. Sepucha, N. M. Thygeson, J. E. Madden, L. Morrissey, and K. K. Kraemer. 2009. 'Evaluating preference-sensitive care for uterine fibroids: It's not so simple', <i>Journal of Women's Health</i> , 18: 1071-79.                                                                                                                                   | Population: Age <60 yrs.              |
| Soto-Perez-de-Celis, E., V. Perez-Montessoro, P. Rojo-Castillo, and Y. Chavarri-Guerra. 2018. 'Correction to: Health-Related Information-Seeking Behaviors and Preferences Among Mexican Patients with Cancer', <i>Journal of cancer education : the official journal of the American Association for Cancer Education</i> , 33: 510.                                                            | Population: Not multimorbid           |

|                       |                                                                                                                                                                                                                                                                                                                                                                                                    |                                                    |
|-----------------------|----------------------------------------------------------------------------------------------------------------------------------------------------------------------------------------------------------------------------------------------------------------------------------------------------------------------------------------------------------------------------------------------------|----------------------------------------------------|
| 1<br>2<br>3<br>4<br>5 | Sowerbutts, A. M., J. Griffiths, C. Todd, and K. Lavelle. 2015. 'Why are older women not having surgery for breast cancer? A qualitative study', <i>Psycho-Oncology</i> , 24: 1036-42.                                                                                                                                                                                                             | Population: Not multimorbid                        |
| 6<br>7<br>8           | Stamm, A. W., J. S. Banerji, E. M. Wolff, A. Slee, S. Akapame, K. Dahl, D. M. John, M. C. Soung, K. R. Pittenger, and J. M. Corman. 2017. 'A decision aid versus shared decision making for prostate cancer screening results of a randomized, controlled trial', <i>Canadian Journal of Urology</i> , 24: 8910-17.                                                                                | Outcome: Preferences not addressed                 |
| 9<br>10<br>11         | Stanek, E. J., M. B. Oates, W. F. McGhan, D. Denofrio, and E. Loh. 2000. 'Preferences for treatment outcomes in patients with heart failure: Symptoms versus survival', <i>Journal of Cardiac Failure</i> , 6: 225-32.                                                                                                                                                                             | Population: Age <60 yrs.                           |
| 12<br>13<br>14        | Stegmann, M. E., J. Schuling, T. J. N. Hiltermann, A. K. L. Reyners, H. Burger, M. Y. Berger, and A. J. Berendsen. 2017. 'Study protocol for the OPTion randomised controlled trial on the effect of prioritising treatment goals among older patients with cancer in a palliative setting', <i>Maturitas</i> , 96: 84-88.                                                                         | Document type: Study protocols                     |
| 15<br>16<br>17        | Sternke, E. A., K. Abrahamson, and M. J. Bair. 2016. 'Comorbid Chronic Pain and Depression: Patient Perspectives on Empathy', <i>Pain management nursing : official journal of the American Society of Pain Management Nurses</i> , 17: 363-71.                                                                                                                                                    | Population: Age <60 yrs.                           |
| 18<br>19<br>20        | Stevenson, Lynne W., Anne S. Hellkamp, Carl V. Leier, George Sopko, Todd Koelling, J. Wayne Warnica, William T. Abraham, Edward K. Kasper, Joseph G. Rogers, Robert M. Califf, Elizabeth E. Schramm, and Christopher M. O'Connor. 2008. 'Changing Preferences for Survival After Hospitalization With Advanced Heart Failure', <i>Journal of the American College of Cardiology</i> , 52: 1702-08. | Population: Age <60 yrs.                           |
| 21<br>22<br>23        | Stewart, M., M. Fortin, and Team Patient-Centred Innovations for Persons with Multimorbidity. 2017. 'Patient-Centred Innovations for Persons with Multimorbidity: funded evaluation protocol', <i>CMAJ open</i> , 5: E365-E72.                                                                                                                                                                     | Document type: Study protocols                     |
| 24<br>25<br>26        | Stone, S. C., S. A. Mohanty, and C. D. McClung. 2010. 'Treatment preferences: Impact of risk and benefit in decision-making', <i>Journal of Palliative Medicine</i> , 13: 39-47.                                                                                                                                                                                                                   | Population: Age <60 yrs.                           |
| 27<br>28              | Straand, J., and H. Sandvik. 2001. 'Stopping long-term drug therapy in general practice. How well do physicians and patients agree?', <i>Family Practice</i> , 18: 597-601.                                                                                                                                                                                                                        | Outcome: Preferences not addressed                 |
| 29<br>30<br>31        | Straton, J. B., N. Y. Wang, L. A. Meoni, D. E. Ford, M. J. Klag, D. Casarett, and J. J. Gallo. 2004. 'Physical functioning, depression, and preferences for treatment at the end of life: the Johns Hopkins Precursors Study', <i>Journal of the American Geriatrics Society</i> , 52: 577-82.                                                                                                     | Outcome: Preferences from physicians or caregivers |
| 32<br>33<br>34        | Street, H., M. O'Connor, and H. Robinson. 2007. 'Depression in older adults: exploring the relationship between goal setting and physical health', <i>International Journal of Geriatric Psychiatry</i> , 22: 1115-9.                                                                                                                                                                              | Outcome: Preferences not addressed                 |
| 35<br>36<br>37        | Sturgeon, K. M., C. Fisher, G. McShea, S. K. Sullivan, D. Sataloff, and K. H. Schmitz. 2018. 'Patient preference and timing for exercise in breast cancer care', <i>Supportive Care in Cancer</i> , 26: 507-14.                                                                                                                                                                                    | Population: Age <60 yrs.                           |
| 38<br>39<br>40        | Subramanian, L., M. Quinn, J. Zhao, L. Lachance, J. Zee, and F. Tentori. 2017. 'Coping with kidney disease - qualitative findings from the Empowering Patients on Choices for Renal Replacement Therapy (EPOCH-RRT) study', <i>BMC Nephrology</i> , 18 (1) (no pagination).                                                                                                                        | Outcome: Preferences not addressed                 |

|                                                                                                                                                                                                                                                                                                                                                                                           |                                       |
|-------------------------------------------------------------------------------------------------------------------------------------------------------------------------------------------------------------------------------------------------------------------------------------------------------------------------------------------------------------------------------------------|---------------------------------------|
| <p>Sun Yat-sen, University. 2018. "Impact of a Printed Decision Aid on Cataract Surgery Choice." In.: <a href="https://ClinicalTrials.gov/show/NCT03525015">https://ClinicalTrials.gov/show/NCT03525015</a>.</p>                                                                                                                                                                          | Population: Not multimorbid           |
| <p>Taheri, C., P. Panchal, T. Kakkar, N. Pattathil, and C. Kreamsoulas. 2016. 'Patient perspectives on cardiac care experiences differ according to gender', <i>Circulation</i>. Conference: American Heart Association's, 134.</p>                                                                                                                                                       | Document type: Conference proceedings |
| <p>Tai, W. T., F. W. Porell, and E. K. Adams. 2004. 'Hospital choice of rural Medicare beneficiaries: patient, hospital attributes, and the patient-physician relationship', <i>Health Services Research</i>, 39: 1903-22.</p>                                                                                                                                                            | Population: Not multimorbid           |
| <p>Takahara, M., T. Shiraiwa, N. Ogawa, M. Yamamoto, Y. Kusuda, M. Shindo, S. Hashio, N. Katakami, T. A. Matsuoka, and I. Shimomura. 2017. 'Patient perspectives on combination therapy of a once-weekly oral medication plus daily medication for lifestyle-related chronic diseases', <i>Internal Medicine</i>, 56: 615-20.</p>                                                         | Outcome: Preferences not addressed    |
| <p>Tamura, M. K., J. C. Tan, and A. M. O'Hare. 2012. 'Optimizing renal replacement therapy in older adults: A framework for making individualized decisions', <i>Kidney International</i>, 82: 261-69.</p>                                                                                                                                                                                | Document type: Editorials & reviews   |
| <p>Tang, S. T., F. H. Wen, W. C. Chang, C. H. Hsieh, W. C. Chou, J. S. Chen, and M. M. Hou. 2017. 'Preferences for Life-Sustaining Treatments Examined by Hidden Markov Modeling Are Mostly Stable in Terminally Ill Cancer Patients' Last Six Months of Life', <i>Journal of Pain and Symptom Management</i>, 54: 628-+.</p>                                                             | Population: Age <60 yrs.              |
| <p>Tattersall, M. H. N., L. Venkateswaran, and G. Szonyi. 2012. 'Are age and self-reported health predictors of older incurable cancer patients' preferences for involvement in decisions about palliative chemotherapy and for receiving prognostic information?', <i>Asia-Pacific Journal of Clinical Oncology</i>, 3): 127.</p>                                                        | Document type: Conference proceedings |
| <p>Taylor L.M., J. C. Spence, K. Raine, A. M. Sharma and R. C. Plotnikoff Self-reported physical activity preferences in individuals with prediabetes. <i>The Physician and Sportsmedicine</i>, 39:2, 41-49</p>                                                                                                                                                                           | Population: Age <60 yrs.              |
| <p>Theile, G., and C. A. Muller. 2012. '[Multimorbid general practice patients - what's really important?]', <i>Praxis</i>, 101: 1621-6.</p>                                                                                                                                                                                                                                              | Document type: Editorials & reviews   |
| <p>Thiem, U., G. Theile, U. Junius-Walker, S. Holt, P. Thurmann, T. Hinrichs, P. Platen, C. Diederichs, K. Berger, J. M. Hodek, W. Greiner, S. Berkemeyer, L. Pientka, and H. J. Trampisch. 2011. 'Prerequisites for a new health care model for elderly people with multimorbidity: the PRISCUS research consortium', <i>Zeitschrift fur Gerontologie und Geriatrie</i>, 44: 115-20.</p> | Outcome: Preferences not addressed    |
| <p>Thomson, R. G., M. P. Eccles, I. N. Steen, Jrtsju Scheme, L. Stobbart, M. J. Murtagh, and C. R. May. 2007. 'A patient decision aid to support shared decision-making on anti-thrombotic treatment of patients with atrial fibrillation: randomised controlled trial', <i>Quality &amp; Safety in Health Care</i>, 16: 216-23.</p>                                                      | Population: Not multimorbid           |
| <p>Thorne, Sally, John L. Oliffe, and Kelli I. Stajduhar. 2013. 'Communicating shared decision-making: Cancer patient perspectives', <i>Patient Education and Counseling</i>, 90: 291-96.</p>                                                                                                                                                                                             | Population: Not multimorbid           |

|                                                                                                                                                                                                                                                                         |                                                                                                                                                                                                                                                                                                                                                                                                                                                                                                                                                                                                                                                                                                                                                                                                                                                                                                                                                                                                                                                                                                                                                                                                                                                                                                                                                                                                                                                                                                                                                                                                                                                                                                                                                                                                                                                                                                                                                                                                                                                                                                                                                                                                                                                                                                                                                                                                                                                                                                                                                                                                                                                                                                                                                                                                                                                                                                                                                                                                                                                                                                                                                                                                                                                                                                                                                                                        |                                                                                                                                                                                                                                                                                                                                                                                                                                                                                                                        |
|-------------------------------------------------------------------------------------------------------------------------------------------------------------------------------------------------------------------------------------------------------------------------|----------------------------------------------------------------------------------------------------------------------------------------------------------------------------------------------------------------------------------------------------------------------------------------------------------------------------------------------------------------------------------------------------------------------------------------------------------------------------------------------------------------------------------------------------------------------------------------------------------------------------------------------------------------------------------------------------------------------------------------------------------------------------------------------------------------------------------------------------------------------------------------------------------------------------------------------------------------------------------------------------------------------------------------------------------------------------------------------------------------------------------------------------------------------------------------------------------------------------------------------------------------------------------------------------------------------------------------------------------------------------------------------------------------------------------------------------------------------------------------------------------------------------------------------------------------------------------------------------------------------------------------------------------------------------------------------------------------------------------------------------------------------------------------------------------------------------------------------------------------------------------------------------------------------------------------------------------------------------------------------------------------------------------------------------------------------------------------------------------------------------------------------------------------------------------------------------------------------------------------------------------------------------------------------------------------------------------------------------------------------------------------------------------------------------------------------------------------------------------------------------------------------------------------------------------------------------------------------------------------------------------------------------------------------------------------------------------------------------------------------------------------------------------------------------------------------------------------------------------------------------------------------------------------------------------------------------------------------------------------------------------------------------------------------------------------------------------------------------------------------------------------------------------------------------------------------------------------------------------------------------------------------------------------------------------------------------------------------------------------------------------------|------------------------------------------------------------------------------------------------------------------------------------------------------------------------------------------------------------------------------------------------------------------------------------------------------------------------------------------------------------------------------------------------------------------------------------------------------------------------------------------------------------------------|
| 1<br>2<br>3<br>4<br>5<br>6<br>7<br>8<br>9<br>10<br>11<br>12<br>13<br>14<br>15<br>16<br>17<br>18<br>19<br>20<br>21<br>22<br>23<br>24<br>25<br>26<br>27<br>28<br>29<br>30<br>31<br>32<br>33<br>34<br>35<br>36<br>37<br>38<br>39<br>40<br>41<br>42<br>43<br>44<br>45<br>46 | <p>Tickle, June. 2016. 'Relationships between advance care planning preferences, symptoms, and place of death in older adults with chronic lung disease', Relationships Between Advance Care Planning Preferences, Symptoms &amp; Place of Death in Older Adults with Chronic Lung Disease: 1-1.</p> <p>Tierney, S., H. Elwers, C. Sange, M. Mamas, M. K. Rutter, M. Gibson, L. Neyses, and C. Deaton. 2011. 'What influences physical activity in people with heart failure?: a qualitative study', Int J Nurs Stud, 48: 1234-43.</p> <p>Timpel, P., C. Lang, J. Wens, J. C. Contel, A. Gilis-Januszewska, K. Kemple, P. E. Schwarz, and Grp Manage Care Study. 2017. 'Individualising Chronic Care Management by Analysing Patients' Needs - A Mixed Method Approach', International Journal of Integrated Care, 17: 12.</p> <p>Tinetti, M. E., J. Esterson, R. Ferris, P. Posner, and C. S. Blaum. 2016. 'Patient Priority-Directed Decision Making and Care for Older Adults with Multiple Chronic Conditions', Clinics in Geriatric Medicine, 32: 261-75.</p> <p>Tinsel, I., A. Buchholz, W. Vach, A. Siegel, T. Durk, A. Buchholz, W. Niebling, and K. G. Fischer. 2013. 'Shared decision-making in antihypertensive therapy: a cluster randomised controlled trial', BMC Family Practice, 14: 135.</p> <p>Tomasovic Mrcela, N., J. A. Borovac, D. Vrdoljak, S. Grazio, A. Tikvica Luetic, and S. Tomek-Roksandic. 2015. 'When elders choose: Which factors could influence the decision-making among elderly in the selection of health tourism services?', Medical Hypotheses, 85: 898-904.</p> <p>Tong, A., P. Sainsbury, S. Chadban, R. G. Walker, D. C. Harris, S. M. Carter, B. Hall, C. Hawley, and J. C. Craig. 2009. 'Patients' experiences and perspectives of living with CKD', American Journal of Kidney Diseases, 53: 689-700.</p> <p>Tong, A., S. Jan, G. Wong, J. C. Craig, M. Irving, S. Chadban, A. Cass, N. Marren, and K. Howard. 2012. 'Patient preferences for the allocation of deceased donor kidneys for transplantation: A mixed methods study', BMC Nephrology, 13 (1) (no pagination).</p> <p>Topaz, Maxim. 2014. 'Developing a tool to support decisions on patient prioritization at admission to home health care', Ph.D.: 191 p-91 p.</p> <p>Tordoff, J., K. Simonsen, W. M. Thomson, and P. T. Norris. 2010. "'It's just routine." A qualitative study of medicine-taking amongst older people in New Zealand', Pharm World Sci, 32: 154-61.</p> <p>Townsend, A., P. Adam, L. C. Li, M. McDonald, and C. L. Backman. 2013. 'Exploring eHealth Ethics and Multi-Morbidity: Protocol for an Interview and Focus Group Study of Patient and Health Care Provider Views and Experiences of Using Digital Media for Health Purposes', JMIR Research Protocols, 2: e38.</p> <p>Uldry, Emilie, Markus Schaefer, Alend Saadi, Valentin Rousson, and Nicolas Demartines. 2013. 'Patients' Preferences on Information and Involvement in Decision Making for Gastrointestinal Surgery', World Journal of Surgery, 37: 2162-71.</p> <p>Valaker, Irene, Maj-Britt Råholm, Tone M. Norekvål, Svein Rotevatn, Bengt Fridlund, and Jan Erik Nordrehaug. 2017. 'Continuity of care after percutaneous coronary intervention: The patient's perspective across secondary and primary care settings', European Journal of Cardiovascular Nursing, 16: 444-52.</p> | <p>No full-text available</p> <p>Document type: Editorials &amp; reviews</p> <p>Population: Age &lt;60 yrs.</p> <p>Document type: Editorials &amp; reviews</p> <p>Population: Not multimorbid</p> <p>Document type: Editorials &amp; reviews</p> <p>Population: Age &lt;60 yrs.</p> <p>Population: Age &lt;60 yrs.</p> <p>Outcome: Preferences not addressed</p> <p>Outcome: Preferences not addressed</p> <p>Document type: Study protocols</p> <p>Population: Age &lt;60 yrs.</p> <p>Population: Not multimorbid</p> |
|-------------------------------------------------------------------------------------------------------------------------------------------------------------------------------------------------------------------------------------------------------------------------|----------------------------------------------------------------------------------------------------------------------------------------------------------------------------------------------------------------------------------------------------------------------------------------------------------------------------------------------------------------------------------------------------------------------------------------------------------------------------------------------------------------------------------------------------------------------------------------------------------------------------------------------------------------------------------------------------------------------------------------------------------------------------------------------------------------------------------------------------------------------------------------------------------------------------------------------------------------------------------------------------------------------------------------------------------------------------------------------------------------------------------------------------------------------------------------------------------------------------------------------------------------------------------------------------------------------------------------------------------------------------------------------------------------------------------------------------------------------------------------------------------------------------------------------------------------------------------------------------------------------------------------------------------------------------------------------------------------------------------------------------------------------------------------------------------------------------------------------------------------------------------------------------------------------------------------------------------------------------------------------------------------------------------------------------------------------------------------------------------------------------------------------------------------------------------------------------------------------------------------------------------------------------------------------------------------------------------------------------------------------------------------------------------------------------------------------------------------------------------------------------------------------------------------------------------------------------------------------------------------------------------------------------------------------------------------------------------------------------------------------------------------------------------------------------------------------------------------------------------------------------------------------------------------------------------------------------------------------------------------------------------------------------------------------------------------------------------------------------------------------------------------------------------------------------------------------------------------------------------------------------------------------------------------------------------------------------------------------------------------------------------------|------------------------------------------------------------------------------------------------------------------------------------------------------------------------------------------------------------------------------------------------------------------------------------------------------------------------------------------------------------------------------------------------------------------------------------------------------------------------------------------------------------------------|

|                                                                                                                                                                                                                                                                         |                                                                                                                                                                                                                                                                                                                                                                                                                                                                                                                                                                                                                                                                                                                                                                                                                                                                                                                                                                                                                                                                                                                                                                                                                                                                                                                                                                                                                                                                                                                                                                                                                                                                                                                                                                                                                                                                                                                                                                                                                                                                                                                                                                                                                                                                                                                                                                                                                                                                                                                                                                                                                                                                                                                                                                                                                                                                                                                                                                                                                                                                                                                                                                                                                                                                                                                                                                                                                                                                                                              |                                                                                                                                                                                                                                                                                                                                                                                                                                                                                                                          |
|-------------------------------------------------------------------------------------------------------------------------------------------------------------------------------------------------------------------------------------------------------------------------|--------------------------------------------------------------------------------------------------------------------------------------------------------------------------------------------------------------------------------------------------------------------------------------------------------------------------------------------------------------------------------------------------------------------------------------------------------------------------------------------------------------------------------------------------------------------------------------------------------------------------------------------------------------------------------------------------------------------------------------------------------------------------------------------------------------------------------------------------------------------------------------------------------------------------------------------------------------------------------------------------------------------------------------------------------------------------------------------------------------------------------------------------------------------------------------------------------------------------------------------------------------------------------------------------------------------------------------------------------------------------------------------------------------------------------------------------------------------------------------------------------------------------------------------------------------------------------------------------------------------------------------------------------------------------------------------------------------------------------------------------------------------------------------------------------------------------------------------------------------------------------------------------------------------------------------------------------------------------------------------------------------------------------------------------------------------------------------------------------------------------------------------------------------------------------------------------------------------------------------------------------------------------------------------------------------------------------------------------------------------------------------------------------------------------------------------------------------------------------------------------------------------------------------------------------------------------------------------------------------------------------------------------------------------------------------------------------------------------------------------------------------------------------------------------------------------------------------------------------------------------------------------------------------------------------------------------------------------------------------------------------------------------------------------------------------------------------------------------------------------------------------------------------------------------------------------------------------------------------------------------------------------------------------------------------------------------------------------------------------------------------------------------------------------------------------------------------------------------------------------------------------|--------------------------------------------------------------------------------------------------------------------------------------------------------------------------------------------------------------------------------------------------------------------------------------------------------------------------------------------------------------------------------------------------------------------------------------------------------------------------------------------------------------------------|
| 1<br>2<br>3<br>4<br>5<br>6<br>7<br>8<br>9<br>10<br>11<br>12<br>13<br>14<br>15<br>16<br>17<br>18<br>19<br>20<br>21<br>22<br>23<br>24<br>25<br>26<br>27<br>28<br>29<br>30<br>31<br>32<br>33<br>34<br>35<br>36<br>37<br>38<br>39<br>40<br>41<br>42<br>43<br>44<br>45<br>46 | <p>Van De Pol, M. H. J., C. R. M. G. Fluit, J. Lagro, D. Niessen, M. G. M. O. Rikkert, and A. L. M. Lagro-Janssen. 2015. 'Quality care provision for older people: An interview study with patients and primary healthcare professionals', <i>British Journal of General Practice</i>, 65: e500-e07.</p> <p>van de Pol, M. H. J., C. R. M. G. Fluit, J. Lagro, Y. H. P. Slaats, M. G. M. Olde Rikkert, and A. L. M. Lagro-Janssen. 2016. 'Expert and patient consensus on a dynamic model for shared decision-making in frail older patients', <i>Patient Education and Counseling</i>, 99: 1069-77.</p> <p>van der Aa, M. J., J. R. van den Broeke, K. Stronks, and T. Plochg. 2017. 'Patients with multimorbidity and their experiences with the healthcare process: a scoping review', <i>J Comorb</i>, 7: 11-21.</p> <p>van Dongen, J. J. J., M. de Wit, H. W. H. Smeets, E. Stoffers, M. A. van Bokhoven, and R. Daniels. 2017. '"They Are Talking About Me, but Not with Me": A Focus Group Study to Explore the Patient Perspective on Interprofessional Team Meetings in Primary Care', <i>Patient</i>, 10: 429-38.</p> <p>van Wijmen, M. P. S., H. R. W. Pasman, G. A. M. Widdershoven, and B. D. Onwuteaka-Philipsen. 2015. 'Continuing or forgoing treatment at the end of life? Preferences of the general public and people with an advance directive', <i>Journal of Medical Ethics</i>, 41: 599-606.</p> <p>Vandermause, R., J. J. Neumiller, B. J. Gates, P. David, M. Altman, D. J. Healey, P. Benson, D. Sunwold, G. Burton, K. R. Tuttle, and C. F. Corbett. 2016. 'Preserving Self: Medication-Taking Practices and Preferences of Older Adults With Multiple Chronic Medical Conditions', <i>Journal of Nursing Scholarship</i>, 48: 533-42.</p> <p>Venkateswaran, L. P., M. Tattersall, G. Szonyi, L. Horvath, N. Wilcken, M. Wong, P. Butow, J. Jansen, and R. Hui. 2009. 'Participation preferences in decision-making in cancer treatment - The 'PREDICT' study', <i>Asia-Pacific Journal of Clinical Oncology</i>, 2): A201-A02.</p> <p>Vermunt, N. P. C. A., M. Harmsen, G. P. Westert, M. G. M. Olde Rikkert, and M. J. Faber. 2017. 'Collaborative goal setting with elderly patients with chronic disease or multimorbidity: a systematic review', <i>BMC Geriatrics</i>, 17: 167.</p> <p>Vermunt, N. P., M. Harmsen, G. Elwyn, G. P. Westert, J. S. Burgers, M. G. Olde Rikkert, and M. J. Faber. 2018. 'A three-goal model for patients with multimorbidity: A qualitative approach', <i>Health Expectations</i>, 21: 528-38.</p> <p>Vermunt, Npca, G. P. Westert, M. G. M. Olde Rikkert, and M. J. Faber. 2018. 'Assessment of goals and priorities in patients with a chronic condition: a secondary quantitative analysis of determinants across 11 countries', <i>Scandinavian journal of primary health care</i>, 36: 80-88.</p> <p>Vina, E. R., D. Ran, E. L. Ashbeck, M. Kaur, and C. K. Kwoh. 2017. 'Relationship Between Knee Pain and Patient Preferences for Joint Replacement: Health Care Access Matters', <i>Arthritis Care and Research</i>, 69: 95-103.</p> <p>Voigt, I., J. Wrede, H. Diederichs-Egidi, M. L. Dierks, E. Hummers-Pradier, and U. Junius-Walker. 2010. 'Prüfcheck: Patientenzentrierte behandlungsplanung mit älteren multimorbiden patienten: Methodik und design. = PrefCheck: Patient-centered treatment planning with older multimorbid patients. Method and design', <i>Zeitschrift für Gerontologie und Geriatrie</i>, 43: 303-09.</p> | <p>Population: Not multimorbid</p> <p>Outcome: Preferences not addressed</p> <p>Document type: Editorials &amp; reviews</p> <p>Population: Not multimorbid</p> <p>Population: Not multimorbid</p> <p>Outcome: Preferences not addressed</p> <p>Document type: Conference proceedings</p> <p>Document type: Editorials &amp; reviews</p> <p>Outcome: Preferences from physicians or caregivers</p> <p>Outcome: Preferences not addressed</p> <p>Population: Not multimorbid</p> <p>Outcome: Preferences not addressed</p> |
|-------------------------------------------------------------------------------------------------------------------------------------------------------------------------------------------------------------------------------------------------------------------------|--------------------------------------------------------------------------------------------------------------------------------------------------------------------------------------------------------------------------------------------------------------------------------------------------------------------------------------------------------------------------------------------------------------------------------------------------------------------------------------------------------------------------------------------------------------------------------------------------------------------------------------------------------------------------------------------------------------------------------------------------------------------------------------------------------------------------------------------------------------------------------------------------------------------------------------------------------------------------------------------------------------------------------------------------------------------------------------------------------------------------------------------------------------------------------------------------------------------------------------------------------------------------------------------------------------------------------------------------------------------------------------------------------------------------------------------------------------------------------------------------------------------------------------------------------------------------------------------------------------------------------------------------------------------------------------------------------------------------------------------------------------------------------------------------------------------------------------------------------------------------------------------------------------------------------------------------------------------------------------------------------------------------------------------------------------------------------------------------------------------------------------------------------------------------------------------------------------------------------------------------------------------------------------------------------------------------------------------------------------------------------------------------------------------------------------------------------------------------------------------------------------------------------------------------------------------------------------------------------------------------------------------------------------------------------------------------------------------------------------------------------------------------------------------------------------------------------------------------------------------------------------------------------------------------------------------------------------------------------------------------------------------------------------------------------------------------------------------------------------------------------------------------------------------------------------------------------------------------------------------------------------------------------------------------------------------------------------------------------------------------------------------------------------------------------------------------------------------------------------------------------------|--------------------------------------------------------------------------------------------------------------------------------------------------------------------------------------------------------------------------------------------------------------------------------------------------------------------------------------------------------------------------------------------------------------------------------------------------------------------------------------------------------------------------|



|                                                                                                                                                                                                                                                                                                                    |                                     |
|--------------------------------------------------------------------------------------------------------------------------------------------------------------------------------------------------------------------------------------------------------------------------------------------------------------------|-------------------------------------|
| Vreugdenhil, G. 2018. 'Shared decision-making in palliative care: desires and facts', Supportive Care in Cancer, 26.                                                                                                                                                                                               | Document type: Editorials & reviews |
| Walker, R. C., R. L. Morton, A. Tong, M. R. Marshall, S. Palmer, and K. Howard. 2015. 'Patient and caregiver preferences for home dialysis-the home first study: a protocol for qualitative interviews and discrete choice experiments', BMJ Open, 5: 6.                                                           | Document type: Study protocols      |
| Wallner, L. P., Y. Li, A. K. C. Furgal, C. R. Friese, A. S. Hamilton, K. C. Ward, R. Jaggi, S. J. Katz, and S. T. Hawley. 2017. 'Patient preferences for primary care provider roles in breast cancer survivorship care', Journal of Clinical Oncology, 35: 2942-48.                                               | Population: Not multimorbid         |
| Ward, L., and J. Draper. 2008. 'A review of the factors involved in older people's decision making with regard to influenza vaccination: A literature review', Journal of Clinical Nursing, 17: 5-16.                                                                                                              | Outcome: Preferences not addressed  |
| Washington State, University, and Center Providence Medical Research. 2012. "Medication-taking Preferences & Practices of Patients With Chronic Conditions." In.: <a href="https://ClinicalTrials.gov/show/NCT01614353">https://ClinicalTrials.gov/show/NCT01614353</a> .                                          | Ongoing study                       |
| White, Carolynne, Primrose Lentin, and Louise Farnworth. 2016. 'Multimorbidity and the process of living with ongoing illness', Chronic Illness, 12: 83-97.                                                                                                                                                        | Population: Age <60 yrs.            |
| Whitson, H. E., K. Steinhäuser, N. Ammarell, D. Whitaker, S. W. Cousins, D. Ansah, L. L. Sanders, and H. J. Cohen. 2011. 'Categorizing the effect of comorbidity: a qualitative study of individuals' experiences in a low-vision rehabilitation program', Journal of the American Geriatrics Society, 59: 1802-9. | Outcome: Preferences not addressed  |
| Wilkinson, C., M. Khanji, P. E. Cotter, O. Dunne, and S. T. O'Keefe. 2008. 'Preferences of acutely ill patients for participation in medical decision-making', Quality & Safety in Health Care, 17: 97-100.                                                                                                        | Population: Not multimorbid         |
| Williams, A. 2004. 'Patients with comorbidities: perceptions of acute care services', Journal of Advanced Nursing, 46: 13-22.                                                                                                                                                                                      | Outcome: Preferences not addressed  |
| Williams, A., and E. Manias. 2014. 'Exploring motivation and confidence in taking prescribed medicines in coexisting diseases: a qualitative study', J Clin Nurs, 23: 471-81.                                                                                                                                      | Outcome: Preferences not addressed  |
| Williams, B., A. Shaw, R. Durrant, I. Crinson, C. Pagliari, and S. de Lusignan. 2005. 'Patient perspectives on multiple medications versus combined pills: A qualitative study', QJM - Monthly Journal of the Association of Physicians, 98: 885-93.                                                               | Outcome: Preferences not addressed  |
| Wilson, D. M., and S. Birch. 2018. 'A scoping review of research to assess the frequency, types, and reasons for end-of-life care setting transitions', Scand J Public Health: 1403494818785042.                                                                                                                   | Outcome: Preferences not addressed  |
| Winter, L., M. P. Lawton, and K. Ruckdeschel. 2003. 'Preferences for prolonging life: A prospect theory approach', International Journal of Aging & Human Development, 56: 155-70.                                                                                                                                 | Population: Not multimorbid         |
| Winter, Laraine, and Barbara Parker. 2007. 'Current health and preferences for life-prolonging treatments: An application of prospect theory to end-of-life decision making', Social Science & Medicine, 65: 1695-707.                                                                                             | Population: Not multimorbid         |
| Wittink, M. N., P. Walsh, S. Yilmaz, M. Mendoza, R. L. Street, B. P. Chapman, and P. Duberstein. 2018. 'Patient priorities and the doorknob phenomenon in primary care: Can technology improve disclosure of patient stressors?', Patient Education and Counseling, 101: 214-20.                                   | Population: Age <60 yrs.            |

|                       |                                                                                                                                                                                                                                                                                                                                                                                                         |                                                    |
|-----------------------|---------------------------------------------------------------------------------------------------------------------------------------------------------------------------------------------------------------------------------------------------------------------------------------------------------------------------------------------------------------------------------------------------------|----------------------------------------------------|
| 1<br>2<br>3<br>4<br>5 | Woda, A., R. A. Belknap, K. Haglund, M. Sebern, and A. Lawrence. 2015. 'Factors influencing self-care behaviors of African Americans with heart failure: a photovoice project', <i>Heart Lung</i> , 44: 33-8.                                                                                                                                                                                           | Outcome: Preferences not addressed                 |
| 6<br>7<br>8           | Wrede, J., I. Voigt, J. Bleidorn, E. Hummers-Pradier, M. L. Dierks, and U. Junius-Walker. 2013. 'Complex health care decisions with older patients in general practice: Patient-centeredness and prioritization in consultations following a geriatric assessment', <i>Patient Education and Counseling</i> , 90: 54-60.                                                                                | Outcome: Preferences from physicians or caregivers |
| 9<br>10<br>11<br>12   | Xu, Y., L. Sudharshan, M. A. Hsu, A. Koenig, J. C. Cappelleri, W. Liu, T. Smith, and M. Pasquale. 2017. 'Patient preferences associated with the use of treatments for psoriatic arthritis: Results of a conjoint analysis', <i>Arthritis and Rheumatology</i> . Conference: American College of Rheumatology/Association of Rheumatology Health Professionals Annual Scientific Meeting, ACR/ARHP, 69. | Population: Not multimorbid                        |
| 13<br>14              | Xue, A., S. Mincer, K. Domino, and K. Posner. 2015. 'Predictors of control preferences in the pre-anesthesia clinic', <i>Journal of Investigative Medicine</i> , 63 (1): 199.                                                                                                                                                                                                                           | Document type: Conference proceedings              |
| 15<br>16<br>17<br>18  | Yi, D., M. Ryan, S. Campbell, A. Elliott, N. Torrance, A. Chambers, M. Johnston, P. Hannaford, and B. H. Smith. 2011. 'Using discrete choice experiments to inform randomised controlled trials: an application to chronic low back pain management in primary care', <i>European Journal of Pain</i> , 15: 531.e1-10.                                                                                  | Population: Age <60 yrs.                           |
| 19<br>20              | Youssef, A. T., R. Constantino, Z. K. Chaudhary, A. Lee, D. Wiljer, M. Mylopoulos, and S. Sockalingam. 2017. 'Mapping Evidence of Patients' Experiences in Integrated Care Settings: A Protocol for a Scoping Review', <i>BMJ Open</i> , 7: e018311.                                                                                                                                                    | Document type: Study protocols                     |
| 21<br>22<br>23<br>24  | Youssef, E., V. Cooper, A. Miners, C. Llewellyn, A. Pollard, M. Lagarde, M. Sachikonye, C. Sabin, C. Foreman, N. Perry, E. Nixon, and M. Fisher. 2016. 'Understanding HIV-positive patients' preferences for healthcare services: A protocol for a discrete choice experiment', <i>BMJ Open</i> , 6 (7) (no pagination).                                                                                | Population: Age <60 yrs.                           |
| 25<br>26<br>27        | Yu, C. H., D. Stacey, J. Sale, S. Hall, D. M. Kaplan, N. Ivers, J. Rezmovitz, F. H. Leung, B. R. Shah, and S. E. Straus. 2014. 'Designing and evaluating an interprofessional shared decision-making and goal-setting decision aid for patients with diabetes in clinical care--systematic decision aid development and study protocol', <i>Implementation science : IS</i> , 9: 16.                    | Duplicates                                         |
| 28<br>29<br>30<br>31  | Yu, C. H., N. M. Ivers, D. Stacey, J. Rezmovitz, D. Telner, K. Thorpe, S. Hall, M. Settino, D. M. Kaplan, M. Coons, S. Sodhi, J. Sale, and S. E. Straus. 2015. 'Impact of an interprofessional shared decision-making and goal-setting decision aid for patients with diabetes on decisional conflict--study protocol for a randomized controlled trial', 16: 286.                                      | Document type: Study protocols                     |
| 32<br>33<br>34        | Zarrin, S., K. Patel, N. Thompson, I. Maravilla, and C. Ritchie. 2017. 'Can't teach an older dog new tricks? : CComparing goal setting and completion among younger and older adults with multiple chronic conditions', <i>Journal of the American Geriatrics Society</i> , 65 (Supplement 1): S216-S17.                                                                                                | Document type: Conference proceedings              |
| 35<br>36<br>37<br>38  | Zijlstra, T. J., S. J. Leenman-Dekker, H. K. E. Oldenhuis, H. E. P. Bosveld, and A. J. Berendsen. 2016. 'Knowledge and preferences regarding cardiopulmonary resuscitation: A survey among older patients', <i>Patient Education and Counseling</i> , 99: 160-63.                                                                                                                                       | Population: Not multimorbid                        |

**Supplementary table 1. Preferred Reporting Items for Systematic reviews and Meta-Analyses extension for Scoping Reviews (PRISMA-ScR) Checklist**

| SECTION                           | ITEM | PRISMA-ScR CHECKLIST ITEM                                                                                                                                                                                                                                                 | REPORTED ON PAGE #      |
|-----------------------------------|------|---------------------------------------------------------------------------------------------------------------------------------------------------------------------------------------------------------------------------------------------------------------------------|-------------------------|
| <b>TITLE</b>                      |      |                                                                                                                                                                                                                                                                           |                         |
| Title                             | 1    | Identify the report as a scoping review.                                                                                                                                                                                                                                  | Page 1                  |
| <b>ABSTRACT</b>                   |      |                                                                                                                                                                                                                                                                           |                         |
| Structured summary                | 2    | Provide a structured summary that includes (as applicable): background, objectives, eligibility criteria, sources of evidence, charting methods, results, and conclusions that relate to the review questions and objectives.                                             | Pages 5-6               |
| <b>INTRODUCTION</b>               |      |                                                                                                                                                                                                                                                                           |                         |
| Rationale                         | 3    | Describe the rationale for the review in the context of what is already known. Explain why the review questions/objectives lend themselves to a scoping review approach.                                                                                                  | Pages 8-9               |
| Objectives                        | 4    | Provide an explicit statement of the questions and objectives being addressed with reference to their key elements (e.g., population or participants, concepts, and context) or other relevant key elements used to conceptualise the review questions and/or objectives. | Page 9                  |
| <b>METHODS</b>                    |      |                                                                                                                                                                                                                                                                           |                         |
| Protocol and registration         | 5    | Indicate whether a review protocol exists; state if and where it can be accessed (e.g., a web address); and if available, provide registration information, including the registration number.                                                                            | Page 6                  |
| Eligibility criteria              | 6    | Specify characteristics of the sources of evidence used as eligibility criteria (e.g., years considered, language, and publication status), and provide a rationale.                                                                                                      | Pages 10-11             |
| Information sources*              | 7    | Describe all information sources in the search (e.g., databases with dates of coverage and contact with authors to identify additional sources), as well as the date the most recent search was executed.                                                                 | Page 9-10               |
| Search                            | 8    | Present the full electronic search strategy for at least 1 database, including any limits used, such that it could be repeated.                                                                                                                                           | Page 10; Suppl table 2. |
| Selection of sources of evidence† | 9    | State the process for selecting sources of evidence (i.e., screening and eligibility) included in the scoping review.                                                                                                                                                     | Page 10-11              |
| Data charting process‡            | 10   | Describe the methods of charting data from the included sources of evidence (e.g., calibrated forms, or forms that were tested by the team before being used, and whether data charting was done independently or in                                                      | Page 10                 |

| SECTION                                              | ITEM | PRISMA-ScR CHECKLIST ITEM                                                                                                                                                                                   | REPORTED ON PAGE #                |
|------------------------------------------------------|------|-------------------------------------------------------------------------------------------------------------------------------------------------------------------------------------------------------------|-----------------------------------|
|                                                      |      | duplicate) and any processes for obtaining and confirming data from investigators.                                                                                                                          |                                   |
| Data items                                           | 11   | List and define all variables for which data were sought and any assumptions and simplifications made.                                                                                                      | Page 11                           |
| Critical appraisal of individual sources of evidence | 12   | If applicable, provide a rationale for conducting a critical appraisal of included sources of evidence; describe the methods used and how this information was used in any data synthesis (if appropriate). | Not applicable                    |
| Synthesis of results                                 | 13   | Describe the methods of dealing with and summarising the data that were charted.                                                                                                                            | Page 11-12                        |
| <b>RESULTS</b>                                       |      |                                                                                                                                                                                                             |                                   |
| Selection of sources of evidence                     | 14   | Give numbers of sources of evidence screened, assessed for eligibility, and included in the review, with reasons for exclusions at each stage, ideally using a flow diagram.                                | Page 12; Suppl table 3, Figure 1. |
| Characteristics of sources of evidence               | 15   | For each source of evidence, present characteristics for which data were charted and provide the citations.                                                                                                 | Page 12; Table 1.                 |
| Critical appraisal within sources of evidence        | 16   | If done, present data on critical appraisal of included sources of evidence (see item 12).                                                                                                                  | Not applicable                    |
| Results of individual sources of evidence            | 17   | For each included source of evidence, present the relevant data that were charted that relate to the review questions and objectives.                                                                       | Pages 13-16; Tables 2 and 3.      |
| Synthesis of results                                 | 18   | Summarise and/or present the charting results as they relate to the review questions and objectives.                                                                                                        | Pages 13-16; Figure 2             |
| <b>DISCUSSION</b>                                    |      |                                                                                                                                                                                                             |                                   |
| Summary of evidence                                  | 19   | Summarise the main results (including an overview of concepts, themes, and types of evidence available), link to the review questions and objectives, and consider the relevance to key groups.             | Pages 16-18                       |
| Limitations                                          | 20   | Discuss the limitations of the scoping review process.                                                                                                                                                      | Page 19                           |
| Conclusions                                          | 21   | Provide a general interpretation of the results with respect to the review questions and objectives, as well as potential implications and/or next steps.                                                   | Page 20                           |
| <b>FUNDING</b>                                       |      |                                                                                                                                                                                                             |                                   |
| Funding                                              | 22   | Describe sources of funding for the included sources of evidence, as well as sources of funding for the scoping review. Describe the role of the funders of the scoping review.                             | Page 41                           |

JBI = Joanna Briggs Institute; PRISMA-ScR = Preferred Reporting Items for Systematic reviews and Meta-Analyses extension for Scoping Reviews.

1  
2  
3 \* Where *sources of evidence* (see second footnote) come from, such as bibliographic  
4 databases, social media platforms, and Web sites.

5 † A more inclusive/heterogeneous term used to account for the different types of evidence or  
6 data sources (e.g., quantitative and/or qualitative research, expert opinion, and policy  
7 documents) that may be eligible for inclusion in a scoping review as opposed to only studies.  
8 This is not to be confused with *information sources* (see first footnote).

9 ‡ The frameworks by Arksey and O'Malley (6) and Levac and colleagues (7) and the JBI  
10 guidance (4, 5) refer to the process of data extraction in a scoping review as data charting.

11 § The process of systematically examining research evidence to assess its validity, results, and  
12 relevance before using it to inform a decision. This term is used for items 12 and 19 instead of  
13 "risk of bias" (which is more applicable to systematic reviews of interventions) to include and  
14 acknowledge the various sources of evidence that may be used in a scoping review (e.g.,  
15 quantitative and/or qualitative research, expert opinion, and policy document).  
16  
17  
18  
19  
20

21 *From:* Tricco AC, Lillie E, Zarin W, O'Brien KK, Colquhoun H, Levac D, et al. PRISMA Extension  
22 for Scoping Reviews (PRISMA-ScR): Checklist and Explanation. *Ann Intern Med.*169:467–473.  
23 doi: 10.7326/M18-0850  
24  
25  
26  
27  
28  
29  
30  
31  
32  
33  
34  
35  
36  
37  
38  
39  
40  
41  
42  
43  
44  
45  
46  
47  
48  
49  
50  
51  
52  
53  
54  
55  
56  
57  
58  
59  
60

# BMJ Open

## Health-related preferences of older patients with multimorbidity: an evidence map.

|                                 |                                                                                                                                                                                                                                                                                                                                                                                                                                                                                                                                                                                                                                                                                                                                                                                                                                                                                                                                                                                                                                                                                                                                                                                                                                                                                                                                                                                                                                                                                                                                                                                                                                                                                                                                                                                                                                                                                                                                                                                                                                                                 |
|---------------------------------|-----------------------------------------------------------------------------------------------------------------------------------------------------------------------------------------------------------------------------------------------------------------------------------------------------------------------------------------------------------------------------------------------------------------------------------------------------------------------------------------------------------------------------------------------------------------------------------------------------------------------------------------------------------------------------------------------------------------------------------------------------------------------------------------------------------------------------------------------------------------------------------------------------------------------------------------------------------------------------------------------------------------------------------------------------------------------------------------------------------------------------------------------------------------------------------------------------------------------------------------------------------------------------------------------------------------------------------------------------------------------------------------------------------------------------------------------------------------------------------------------------------------------------------------------------------------------------------------------------------------------------------------------------------------------------------------------------------------------------------------------------------------------------------------------------------------------------------------------------------------------------------------------------------------------------------------------------------------------------------------------------------------------------------------------------------------|
| Journal:                        | <i>BMJ Open</i>                                                                                                                                                                                                                                                                                                                                                                                                                                                                                                                                                                                                                                                                                                                                                                                                                                                                                                                                                                                                                                                                                                                                                                                                                                                                                                                                                                                                                                                                                                                                                                                                                                                                                                                                                                                                                                                                                                                                                                                                                                                 |
| Manuscript ID                   | bmjopen-2019-034485.R1                                                                                                                                                                                                                                                                                                                                                                                                                                                                                                                                                                                                                                                                                                                                                                                                                                                                                                                                                                                                                                                                                                                                                                                                                                                                                                                                                                                                                                                                                                                                                                                                                                                                                                                                                                                                                                                                                                                                                                                                                                          |
| Article Type:                   | Original research                                                                                                                                                                                                                                                                                                                                                                                                                                                                                                                                                                                                                                                                                                                                                                                                                                                                                                                                                                                                                                                                                                                                                                                                                                                                                                                                                                                                                                                                                                                                                                                                                                                                                                                                                                                                                                                                                                                                                                                                                                               |
| Date Submitted by the Author:   | 23-Oct-2019                                                                                                                                                                                                                                                                                                                                                                                                                                                                                                                                                                                                                                                                                                                                                                                                                                                                                                                                                                                                                                                                                                                                                                                                                                                                                                                                                                                                                                                                                                                                                                                                                                                                                                                                                                                                                                                                                                                                                                                                                                                     |
| Complete List of Authors:       | <p>GONZALEZ, ANA; Johann Wolfgang Goethe-Universität Frankfurt am Main, Institute of General Medicine; Red de Investigación en Servicios de Salud en Enfermedades Crónicas</p> <p>Schmucker, Christine; University of Freiburg Faculty of Medicine, Institute for Evidence in Medicine (for Cochrane Germany Foundation), Medical Center - University of Freiburg</p> <p>Nothacker, Julia; University of Freiburg Faculty of Medicine, Institute for Evidence in Medicine (for Cochrane Germany Foundation), Medical Center - University of Freiburg</p> <p>Motschall, Edith ; University of Freiburg Faculty of Medicine, Institute of Medical Biometry and Statistics</p> <p>Nguyen, Truc; Johann Wolfgang Goethe-Universität Frankfurt am Main, Institute of General Practice</p> <p>Brueckle, Maria-Sophie; Johann Wolfgang Goethe-Universität Frankfurt am Main, Institut of General Practice</p> <p>Blom, Jeanet; Leiden University Medical Center, Department of Public Health and Primary Care</p> <p>van den Akker, Marjan; Johann Wolfgang Goethe-Universität Frankfurt am Main, Institute of General Practice; Maastricht University, Department of Family Medicine, Care and Public Health Research Institute (CAPHRI)</p> <p>Röttger, Kristian; Gemeinsamer Bundesausschuss, Patient representative, Federal Joint Committee</p> <p>Wegwarth, Odette; Max-Planck-Institute for Human Development, Center for Adaptative Rationality</p> <p>Hoffmann, Tammy; Bond University Faculty of Health Sciences and Medicine, Institute for Evidence-Based Healthcare</p> <p>Straus, Sharon; University of Toronto, Department of Medicine</p> <p>Gerlach, Ferdinand; Johann Wolfgang Goethe-Universität Frankfurt am Main, Institute of General Medicine</p> <p>Meerpohl, Joerg; University of Freiburg Faculty of Medicine, Institute for Evidence in Medicine (for Cochrane Germany Foundation), Medical Center - University of Freiburg</p> <p>Muth, Christiane; Johann Wolfgang Goethe-Universität Frankfurt am Main, Institut of General Practice</p> |
| <b>Primary Subject Heading</b>: | Geriatric medicine                                                                                                                                                                                                                                                                                                                                                                                                                                                                                                                                                                                                                                                                                                                                                                                                                                                                                                                                                                                                                                                                                                                                                                                                                                                                                                                                                                                                                                                                                                                                                                                                                                                                                                                                                                                                                                                                                                                                                                                                                                              |
| Secondary Subject Heading:      | Evidence based practice                                                                                                                                                                                                                                                                                                                                                                                                                                                                                                                                                                                                                                                                                                                                                                                                                                                                                                                                                                                                                                                                                                                                                                                                                                                                                                                                                                                                                                                                                                                                                                                                                                                                                                                                                                                                                                                                                                                                                                                                                                         |

1  
2  
3  
4  
5  
6  
7  
8  
9  
10  
11  
12  
13  
14  
15  
16  
17  
18  
19  
20  
21  
22  
23  
24  
25  
26  
27  
28  
29  
30  
31  
32  
33  
34  
35  
36  
37  
38  
39  
40  
41  
42  
43  
44  
45  
46  
47  
48  
49  
50  
51  
52  
53  
54  
55  
56  
57  
58  
59  
60

|           |                                                                                 |
|-----------|---------------------------------------------------------------------------------|
| Keywords: | GENERAL MEDICINE (see Internal Medicine), INTERNAL MEDICINE, GERIATRIC MEDICINE |
|           |                                                                                 |

SCHOLARONE™  
Manuscripts

1  
2  
3 1 **TITLE**  
4

5 2 Health-related preferences of older patients with multimorbidity: an evidence map.  
6  
7  
8 3

9  
10 4 **AUTHORS**  
11

12 5 Ana I. González González\*

13  
14 6 Institute of General Practice, Johann Wolfgang Goethe University, Frankfurt / Main, GERMANY.

15  
16 7 Red de Investigación en Servicios de Salud en Enfermedades Crónicas (REDISSEC), Madrid,  
17  
18 8 SPAIN.

19  
20  
21 9 Email: [GonzalezGonzalez@allgemeinmedizin.uni-frankfurt.de](mailto:GonzalezGonzalez@allgemeinmedizin.uni-frankfurt.de)  
22

23 10  
24  
25 11 Christine Schmucker\*

26  
27 12 Institute for Evidence in Medicine (for Cochrane Germany Foundation), Medical Center-

28  
29 13 University of Freiburg, Faculty of Medicine, University of Freiburg, Freiburg, GERMANY.

30  
31 14 Email: [schmucker@ifem.uni-freiburg.de](mailto:schmucker@ifem.uni-freiburg.de)  
32  
33

34 15  
35  
36 16 Julia Nothacker

37  
38 17 Institute for Evidence in Medicine (for Cochrane Germany Foundation), Medical Center-

39  
40 18 University of Freiburg, Faculty of Medicine, University of Freiburg, Freiburg, GERMANY.

41  
42 19 Email: [nothacker@cochrane.de](mailto:nothacker@cochrane.de)  
43  
44

45 20  
46  
47 21 Edith Motschall

48  
49 22 Institute of Medical Biometry and Statistics, Faculty of Medicine, University of Freiburg,

50  
51 23 Freiburg, GERMANY.

52  
53 24 Email: [motschall@imbi.uni-freiburg.de](mailto:motschall@imbi.uni-freiburg.de)  
54  
55

56 25  
57  
58 26 Truc Sophia Nguyen  
59  
60



1  
2  
3 27 Institute of General Practice, Johann Wolfgang Goethe University, Frankfurt / Main, GERMANY.

4  
5 28 Email: [Nguyen@allgemeinmedizin.uni-frankfurt.de](mailto:Nguyen@allgemeinmedizin.uni-frankfurt.de)  
6  
7

8 29

9  
10 30 Maria-Sophie Brueckle

11  
12 31 Institute of General Practice, Johann Wolfgang Goethe University, Frankfurt / Main, GERMANY.

13  
14 32 Email: [brueckle@allgemeinmedizin.uni-frankfurt.de](mailto:brueckle@allgemeinmedizin.uni-frankfurt.de)  
15  
16

17 33

18  
19 34 Jeanet W. Blom

20  
21 35 Department of Public Health and Primary Care, Leiden University Medical Center, Leiden, THE

22  
23 36 NETHERLANDS.

24  
25 37 Email: [J.W.Blom@lumc.nl](mailto:J.W.Blom@lumc.nl)  
26  
27

28 38

29  
30 39 Marjan van den Akker

31  
32 40 Institute of General Practice, Johann Wolfgang Goethe University, Frankfurt / Main, GERMANY.

33  
34 41 Department of Family Medicine, Care and Public Health Research Institute (CAPHRI), Maastricht

35  
36 42 University, Maastricht, THE NETHERLANDS.

37  
38 43 Email: [m.vandenAkker@allgemeinmedizin.uni-frankfurt.de](mailto:m.vandenAkker@allgemeinmedizin.uni-frankfurt.de)  
39  
40

41 44

42  
43 45 Kristian Röttger

44  
45 46 Patient representative, Federal Joint Committee "Gemeinsamer Bundesausschuss", Berlin.

46  
47 47 GERMANY.

48  
49 48 Email: [kristianroettger@aol.de](mailto:kristianroettger@aol.de)  
50  
51

52 49

53  
54 50 Odette Wegwarth

55  
56 51 Center for Adaptive Rationality, Max Planck-Institute for Human Development, Berlin,

57  
58 52 GERMANY.  
59  
60

1  
2  
3 53 Email: [wegwarth@mpib-berlin.mpg.de](mailto:wegwarth@mpib-berlin.mpg.de)  
4

5 54  
6

7 55 Tammy Hoffmann  
8

9 56 Institute for Evidence-Based Healthcare, Faculty of Health Sciences and Medicine, Bond  
10

11 57 University, Gold Coast, AUSTRALIA.  
12

13 58 Email: [thoffman@bond.edu.au](mailto:thoffman@bond.edu.au)  
14

15 59  
16

17 60 Sharon E. Straus  
18

19 61 Department of Medicine, University of Toronto, CANADA.  
20

21 62 Email: [sharon.straus@utoronto.ca](mailto:sharon.straus@utoronto.ca)  
22

23 63  
24

25 64 Ferdinand M. Gerlach  
26

27 65 Institute of General Practice, Johann Wolfgang Goethe University, Frankfurt / Main, GERMANY.  
28

29 66 Email: [gerlach@allgemeinmedizin.uni-frankfurt.de](mailto:gerlach@allgemeinmedizin.uni-frankfurt.de)  
30

31 67  
32

33 68 Joerg J. Meerpohl\*\*  
34

35 69 Institute for Evidence in Medicine (for Cochrane Germany Foundation), Medical Center-  
36

37 70 University of Freiburg, Faculty of Medicine, University of Freiburg, Freiburg, GERMANY.  
38

39 71 Email: [meerpohl@ifem.uni-freiburg.de](mailto:meerpohl@ifem.uni-freiburg.de)  
40

41 72  
42

43 73 Christiane Muth\*\*  
44

45 74 Institute of General Practice, Johann Wolfgang Goethe University, Frankfurt / Main, GERMANY.  
46

47 75 Email: [muth@allgemeinmedizin.uni-frankfurt.de](mailto:muth@allgemeinmedizin.uni-frankfurt.de)  
48

49 76 Corresponding author  
50

51 77 \*both authors contributed equally  
52

53 78 \*\*both authors contributed equally  
54  
55  
56  
57  
58  
59  
60

1  
2  
3 80 **ABSTRACT**  
4

5 81 **Objectives:** To systematically identify knowledge clusters and research gaps in the health-  
6  
7 82 related preferences of older patients with multimorbidity by mapping current evidence.  
8

9  
10 83 **Design:** Evidence map (systematic review variant).  
11

12 84 **Data sources:** MEDLINE, EMBASE, PsycINFO, PSYINDEX, CINAHL and Science Citation  
13  
14 85 Index/Social Science Citation Index/-Expanded from inception to April 2018.  
15

16 86 **Study selection:** Studies reporting primary research on health-related preferences of older  
17  
18 87 patients (mean age  $\geq 60$  years) with multimorbidity ( $\geq 2$  chronic/acute conditions).  
19

20  
21 88 **Data extraction:** Two independent reviewers assessed studies for eligibility, extracted data  
22  
23 89 and clustered the studies using MAXQDA-18<sup>®</sup> content analysis software.  
24

25 90 **Results:** The 152 included studies (62% from North America, 28% from Europe) comprised  
26  
27 91 57,093 patients overall (range 9-9,105). All used an observational design except for one  
28  
29 92 interventional study: 63 (41%) were qualitative (59, cross-sectional, 4 longitudinal), 85 (57%)  
30  
31 93 quantitative (63 cross-sectional, 22 longitudinal), and 3 (2%) used mixed methods. The setting  
32  
33 94 was specialised care in 85 (56%) and primary care in 54 (36%) studies. We identified seven  
34  
35 95 clusters of studies on preferences: end-of-life care (n=51, 34%), self-management (n=34, 22%),  
36  
37 96 treatment (n=32, 21%), involvement in shared decision making (n=25, 17%), health outcome  
38  
39 97 prioritisation/goal setting (n=19, 13%), healthcare service (n=12, 8%) and screening/diagnostic  
40  
41 98 testing (n= 1, 1%). Terminology (e.g. preferences, views, perspectives), and concepts (e.g.  
42  
43 99 trade-offs, decision regret, goal setting) used to describe health-related preferences varied  
44  
45  
46  
47 100 substantially between studies.  
48

49  
50 101 **Conclusion:** Our study provides the first evidence map on the preferences of older patients  
51  
52 102 with multimorbidity. Included studies were mostly conducted in developed countries and  
53  
54 103 covered a broad range of issues. Evidence on patient preferences concerning decision-making  
55  
56 104 on screening and diagnostic testing was scarce. Differences in employed terminology, decision-  
57  
58 105 making components and concepts, as well as the sparsity of intervention studies, are  
59  
60

- 1  
2  
3 106 challenges for future research into evidence-based decision support seeking to elicit the  
4  
5 107 preferences of older patients with multimorbidity and help them construct preferences.  
6  
7 108 **Registration:**  
8  
9 109 Open Science Framework (OSF): DOI 10.17605/OSF.IO/MCRWQ.  
10  
11  
12  
13  
14  
15  
16  
17  
18  
19  
20  
21  
22  
23  
24  
25  
26  
27  
28  
29  
30  
31  
32  
33  
34  
35  
36  
37  
38  
39  
40  
41  
42  
43  
44  
45  
46  
47  
48  
49  
50  
51  
52  
53  
54  
55  
56  
57  
58  
59  
60

For peer review only

1  
2  
3 110 **Strengths and limitations of this study**  
4  
5

6 111 • This evidence map presents a systematic overview of studies addressing a variety of  
7  
8  
9 112 health-related preferences in older patients with multimorbidity.

10  
11  
12 113 • We identified clusters of studies on, for example, health outcome prioritisation and end-  
13  
14 114 of-life care preferences; few studies addressed preference-sensitive decisions on screening  
15  
16 115 and diagnostic testing.

17  
18  
19  
20 116 • The terminology and concepts used to address health-related preferences varied  
21  
22 117 considerably in the included studies, highlighting a need for more standardisation to  
23  
24 118 improve further research.  
25  
26  
27  
28  
29  
30  
31  
32  
33  
34  
35  
36  
37  
38  
39  
40  
41  
42  
43  
44  
45  
46  
47  
48  
49  
50  
51  
52  
53  
54  
55  
56  
57  
58  
59  
60

## 119 INTRODUCTION

120 Multimorbidity, defined as the co-occurrence of medical conditions in a person (1), is a  
121 growing public health concern that affects approximately two-thirds of people over the age of  
122 60 years (2,3). Patients with multimorbidity generally experience a higher burden of disease,  
123 physical disabilities, adverse drug reactions, more frequent hospital admissions, reduced  
124 quality of life, and increased mortality compared to those with a single condition (4,5). As  
125 patients face new and growing demands to organise and coordinate their own care to comply  
126 with treatment regimens, multiple chronic conditions are often associated with high treatment  
127 burden in addition to the burden of the diseases themselves. (6). If patients are overwhelmed  
128 by the burden, they limit their compliance to their preferred tasks (7). Moreover, the care of  
129 patients with multimorbidity is challenging, as treatments for one condition may adversely  
130 affect another (8). Robust evidence supporting decision-making in these patients is scarce (2),  
131 and the use of multiple disease-based guidelines is inappropriate, as they do not adequately  
132 consider potentially interacting conditions and treatments (9,10).

133 The delivery of health care in patients with multimorbidity requires a patient-centred  
134 approach, that is *“respectful of and responsive to individual patient preferences, needs, and  
135 values, and ensuring that patient values guide all clinical decisions”* (11). The *“Ariadne  
136 principles”* (12) stress the importance of physicians and patients sharing realistic treatment  
137 goals, and of individualising management and follow-up by taking patients’ preferences into  
138 consideration when making clinical decisions. Recent clinical guidelines on multimorbidity have  
139 embraced this approach and emphasise the incorporation of patients’ preferences in clinical  
140 decision-making, for example in the selection of appropriate self-management activities and  
141 treatment options, as well as in the prioritisation of health outcomes (13). Similarly, the  
142 consideration of patients' views in the form of patient-reported experiences and care  
143 outcomes have been recognised as critical to the achievement of high-performing health  
144 systems that are responsive to the needs of people with multimorbidity (14).

1  
2  
3 145 It remains unclear how health-related preferences can be elicited from older patients with  
4  
5 146 multimorbidity, as patients may be unfamiliar with the decision elements (15). Moreover,  
6  
7 147 concerns have been raised that patients are often provided with too little information about  
8  
9 148 the benefits and harms of a treatment (16,17), may find it difficult to prioritise health  
10  
11 149 outcomes and make trade-offs, and in consequence, may refrain from participating in the  
12  
13 150 decision making process (18). As evidence maps allow a systematic approach to be used to  
14  
15 151 collate evidence on a broad topic, we used this emerging method to map the health-related  
16  
17 152 preferences of older patients with multimorbidity (19). In particular, we aimed to (i)  
18  
19 153 systematically identify and describe key characteristics of research on health-related  
20  
21 154 preferences of older patients with multimorbidity, (ii) display the landscape of existing  
22  
23 155 research in visual formats, (iii) identify evidence clusters to guide any subsequent knowledge  
24  
25 156 synthesis (systematic reviews and meta-analysis), and (iv) identify evidence gaps and  
26  
27 157 encourage relevant stakeholders and funding agencies to prioritise these in future research.  
28  
29  
30  
31  
32  
33

## 34 159 **METHODS**

### 36 160 **Reporting protocol and guideline**

38  
39 161 We described the methods in a study protocol (20) that has since been subject to no  
40  
41 162 amendments, registered the evidence map in Open Science Framework (OSF, DOI  
42  
43 163 10.17605/OSF.IO/MCRWQ) and adhered to the 'PRISMA Extension for Scoping Reviews  
44  
45 164 (PRISMA-ScR) checklist (21) where possible (see Table S1). [About here: link to Table S1.  
46  
47 165 Preferred Reporting Items for Systematic reviews and Meta-Analyses extension for Scoping  
48  
49 166 Reviews (PRISMA-ScR) Checklist]

50  
51  
52 167

### 54 168 **Systematic literature search**

56  
57 169 We searched the electronic databases MEDLINE and EMBASE (via Wolters Kluwer's search  
58  
59 170 interface Ovid), PsycINFO, PSYINDEX and CINAHL (via EBSCOhost), and Social Science Citation  
60

1  
2  
3 171 Index and Science Citation Index Expanded (via Web of Science from Clarivate Analytics) from  
4  
5 172 inception until April 2018. In our search, we combined medical subject headings (MeSH) with  
6  
7 173 keywords covering old age, multimorbidity, polypharmacy and search terms related to patient  
8  
9 174 preferences. The search strategy was adapted to suit the database under review (see Table S2  
10  
11 175 on Search strategy in MEDLINE - Ovid). [About here: link to Table S2 on Search strategy in  
12  
13 176 MEDLINE (Ovid)]  
14  
15  
16 177 Based on the 32 most relevant studies identified in our initial search (i.e., when keywords  
17  
18 178 provided by the author contained the terms “multimorbidity” and “patient preferences” or  
19  
20 179 “patient priorities” and/ or described a specific method for eliciting patients’ preferences, such  
21  
22 180 as “conjoint analysis”), we also checked the reference lists of included studies (backward  
23  
24 181 citation tracking) and conducted a cited reference search (forward citation tracking) using the  
25  
26 182 Web of Science Core Collection. We checked the reference lists of systematic reviews on  
27  
28 183 related topics for further studies (hand search) and contacted the authors of conference  
29  
30 184 proceedings that had not published a full set of results. We searched for ongoing trials in the  
31  
32 185 Register for Clinical Trials (22) and the WHO International Clinical Trials Registry (23).  
33  
34  
35  
36  
37  
38

### 39 187 **Inclusion and exclusion criteria**

40  
41 188 We included qualitative and quantitative studies involving older patients of 60 years and older  
42  
43 189 with multimorbidity (two or more simultaneous chronic or acute conditions (1)) that  
44  
45 190 addressed health-related patient preferences. We also included studies involving older  
46  
47 191 patients with chronic conditions that are frequently associated with multimorbidity, even if  
48  
49 192 they were not reported in detail (chronic heart failure (CHF), chronic obstructive pulmonary  
50  
51 193 disease (COPD), chronic kidney disease (CKD), advanced cancer and frailty) (24–26).  
52  
53 194 We excluded studies investigating preferences relating to interventions of limited availability  
54  
55 195 or whose legal status was unclear (e.g. euthanasia, which is not legal or available in most  
56  
57 196 countries), studies addressing the preferences of caregivers, family, or medical and/or other  
58  
59  
60



197 professionals as well as case reports, narrative reviews and editorials. We did not apply any  
198 restrictions to the geographical location of the study or language of publication.

199

## 200 **Study selection**

201 Two reviewers (AIG, JN) screened the titles and abstracts of all references identified by  
202 electronic searches. Before screening, stepwise calibration was performed on a sample of 50  
203 studies, with the aim of achieving 80 % agreement between the two reviewers (20). If 80 %  
204 agreement had not been reached, our inclusion and exclusion criteria would have been refined  
205 to reach this cut-off. The new criteria would then have required further calibration using a new  
206 sample of 50 studies until the threshold was reached. We also obtained full texts of potentially  
207 relevant articles, and two reviewers (AIG, JN or CS) independently assessed these for inclusion.  
208 Conflicts were resolved by discussion among reviewers.

209

## 210 **Mapping the evidence**

211 *(i) Data extraction:* Following the calibration of five full text articles, two reviewers (AIG, JN or  
212 CS) independently extracted data on (1) study characteristics including study design  
213 (observational [qualitative, quantitative or mixed-methods, cross-sectional or longitudinal] and  
214 interventional), geographical area, study setting (e.g., primary care), sample size, (2) study aim,  
215 (3) patient population (e.g., definition of multimorbidity, age, sex) and, (4) characteristics of  
216 preferences, such as methods used to elucidate patients' preferences, and definition of  
217 preferences according to the authors.

218 *(ii) Types of preference:* We conducted qualitative relational content analysis (27) to derive  
219 overarching themes. The analysis was based on coding by two independent reviewers (AIG, JN  
220 or CS) using MAXQDA-18<sup>®</sup>, which were further scrutinised by CM, JWB, MvdA, TSN and MSB  
221 (20). The initial step was to scrutinise title and abstract (focusing on the study aim) of the  
222 included studies to gain a general understanding of what the study was about. The full text

1  
2  
3 223 was then read and re-read and codes assigned (e.g. resuscitation preferences (28)), which  
4  
5 224 were later grouped according to overarching themes (e.g. life-sustaining treatment  
6  
7 225 preferences (28)) (27). Reviewers' categorisation of preference types was partly based on a  
8  
9 226 previous classification (i.e. end-of-life preferences, prioritisation of health problems,  
10  
11 227 prioritisation of medication, preferences regarding the role played in decision-making,  
12  
13 228 preferences in surgical treatment methods, prioritisation of treatment goals, determinants of  
14  
15 229 preference, changes in preferences and preferences concerning the organisation of health  
16  
17 230 care) obtained from a pilot study (published elsewhere) of the evidence map.  
18  
19 231 *(iii) Mapping:* We tabulated the identified studies, summarised study and patient  
20  
21 232 characteristics, as well as study publications per year, and used bubble plots to display  
22  
23 233 evidence clusters in terms of preference type and study characteristics.  
24  
25  
26  
27  
28  
29

### 235 **Patient and public involvement**

30  
31 236 A patient representative (KR) from the Federal Joint Committee "Gemeinsamer  
32  
33 237 Bundesausschuss (G-BA)" was involved in the conception and development of the evidence  
34  
35 238 map, in the interpretation of the findings, and in writing the manuscript. KR has considerable  
36  
37 239 expertise in evidence-based medicine in a health care context, and an understanding of the  
38  
39 240 pivotal role of patients' preferences in the provision of effective health care.  
40  
41  
42  
43  
44

## 45 242 **RESULTS**

### 46 243 **Literature search and selection process**

47  
48 244 Among the 9,145 unique screened references, 152 studies (comprising over 57,000 patients)  
49  
50 245 were included in the evidence map. As 80 % agreement between the two reviewers was  
51  
52 246 achieved in the first calibration exercise, inclusion and exclusion criteria remained unchanged.  
53  
54 247 We contacted 48 authors of conference papers (13% answered) and included one further  
55  
56 248 study that had already been identified in our electronic search (Figure 1). Tables S3a-3f show  
57  
58  
59  
60

249 key characteristics of the included studies. Table S4 presents excluded studies and reasons for  
 250 exclusion.

251 [About here Figure 1. Evidence map PRISMA flowchart]

252 [About here: link to Table S3. Key characteristics of the included studies]

253 [About here: link to Table S4. Excluded studies and reasons for exclusion]

254

### 255 **Key characteristics of the included studies and participants**

256 Of the included studies, all but one were observational (151/152), and nearly all were  
 257 conducted in developed countries (147/152) (Table 1, Tables S3a-S3f) and published in 2007 or  
 258 thereafter (128/152) (see Figure S1). All studies were written in English.

259 The sample size ranged from 9 to 9,105 patients and captured both sexes (51% female). The  
 260 mean age of participants ranged from 60 to 85 years. Eight studies (29–36) included different  
 261 age groups but only data from patients aged 60 years and older were included in the evidence  
 262 map. Three studies (36–38) provided no age estimate but were included because they clarified  
 263 that they had only included older patients. In 87 of the included studies, patients with  
 264 multimorbidity (no index disease defined) or comorbidity (index disease defined plus at least  
 265 one other associated condition) were investigated, and in the remaining 65 studies, patients  
 266 with conditions known to be highly associated with multimorbidity were included.

267 [About here: link to Figure S1. Number of studies published per year]

**Table 1. Descriptive summary of included studies**

| Variable                         | Total – n (%) |
|----------------------------------|---------------|
| <i>Study characteristics</i>     |               |
| Geographical location            |               |
| North America                    | 94 (62 %)     |
| Europe                           | 43 (28 %)     |
| Australia & New Zealand          | 10 (7 %)      |
| Asia                             | 5 (3 %)       |
| Setting                          |               |
| Primary care                     | 54 (36 %)     |
| Outpatient specialised           | 59 (39 %)     |
| Hospital (inpatient & emergency) | 26 (17 %)     |

|                                                                                          |                |
|------------------------------------------------------------------------------------------|----------------|
| Nursing homes                                                                            | 5 (3 %)        |
| Interdisciplinary                                                                        | 8 (5 %)        |
| Study design/method                                                                      |                |
| Qualitative (observational)                                                              | 63 (42 %)      |
| Cross-sectional (observational)                                                          | 59 (39 %)      |
| Longitudinal (observational)                                                             | 4 (6 %)        |
| Quantitative                                                                             | 86 (57 %)      |
| Cross-sectional (observational)                                                          | 63 (41 %)      |
| Longitudinal (observational)                                                             | 22 (15 %)      |
| Interventional                                                                           | 1 (1%)         |
| Mixed methods (qualitative and quantitative)                                             | 3 (2 %)        |
| Observational (total)                                                                    | 151 (99 %)     |
| Interventional (total)                                                                   | 1 (1%)         |
| Sample size – median (range)                                                             | 83 (9-9,105)   |
| Observational                                                                            |                |
| Qualitative                                                                              | 30 (9-160)     |
| Quantitative                                                                             | 196 (11-9,105) |
| Mixed methods                                                                            | 50 (32-60)     |
| Interventional                                                                           | 317            |
| <i>Patients' characteristics</i>                                                         |                |
| Type of condition                                                                        |                |
| Studies describing multimorbid patients*                                                 | 58 (38 %)      |
| Studies describing patients with an index disease and comorbidity                        | 29 (19 %)      |
| Diabetes                                                                                 | 7 (5 %)        |
| Hypertension                                                                             | 5 (3 %)        |
| Depression / Mental illness                                                              | 4 (3 %)        |
| Cardiovascular disease                                                                   | 4 (3 %)        |
| Osteoarthritis                                                                           | 3 (2 %)        |
| Other                                                                                    | 6 (4 %)        |
| Studies describing patients with chronic conditions often associated with multimorbidity | 65 (43 %)      |
| Chronic Heart failure                                                                    | 10 (7 %)       |
| Advanced cancer                                                                          | 16 (11 %)      |
| Chronic kidney disease                                                                   | 15 (10 %)      |
| COPD                                                                                     | 4 (3 %)        |
| Mixed (heart failure, COPD...)                                                           | 20 (13 %)      |
| Age (range)**                                                                            | 60-85          |
| Sex (% female)**                                                                         | 28,905 (51 %)  |

\* No further details of included conditions were reported in the majority of studies

\*\*Studies with overlapping population were excluded (n=10) (36,39–47)

1  
2  
3 **268 Types of preference and evidence clusters**  
4

5 269 Content analysis (27) enabled us to identify seven major types of preference (Table 2). We  
6  
7 270 assigned 130 studies (85 %) to one of these types of preference and 22 (15 %) studies (37,48–  
8  
9 271 66) to two types of preference. Terminology (e.g. preferences, views, perspectives), and  
10  
11 272 concepts (e.g. trade-offs, decision regret, goal setting) varied substantially among studies.  
12  
13

14 **Table 2. Description of the type of preferences investigated in the included studies.**  
15

| Types of preferences         | Definition                                                                                                                                                                                                                                                                                                                                                                    | Themes                                  | No. of Studies | References                                                           |
|------------------------------|-------------------------------------------------------------------------------------------------------------------------------------------------------------------------------------------------------------------------------------------------------------------------------------------------------------------------------------------------------------------------------|-----------------------------------------|----------------|----------------------------------------------------------------------|
| End-of-life Care Preferences | Treatment preferences for resuscitation and critical care. Covers all aspects relating to anticipatory decision-making such as advance directives                                                                                                                                                                                                                             | Advanced Care Planning                  | 51             | (28,32–34,36,41–43,45,48,55,59–61,65,67–102)                         |
|                              |                                                                                                                                                                                                                                                                                                                                                                               | - Life-Sustaining Treatment Preferences | 29             | (28,32–34,36,42,45,67,68,70,71,76,77,79,81,83,84,87–90,92–95,98–101) |
| Self-management Preferences* | Preferences related to the ongoing activities that an individual undertakes to maintain or reduce the effect of a disease/s on his or her health status. It includes how and under what circumstances, patients prioritise conditions and adjust self-management practices, how priorities might change over time, and how these are discussed with healthcare professionals. | eHealth Support                         | 2              | (103,104)                                                            |
|                              |                                                                                                                                                                                                                                                                                                                                                                               | Prioritisation of Health Problems       | 20             | (39,40,54,56,63,103,105–118)                                         |
|                              |                                                                                                                                                                                                                                                                                                                                                                               | Medication Self-management              | 8              | (51,52,56,63,119–122)                                                |
|                              |                                                                                                                                                                                                                                                                                                                                                                               | Self-Care Behaviours                    | 3              | (53,64,123)                                                          |
|                              |                                                                                                                                                                                                                                                                                                                                                                               | Revisiting Choices                      | 2              | (29,103)                                                             |
| Treatment Preferences        | Preferences that involve a discrete set of effective treatment options (e.g., radical mastectomy vs lumpectomy with radiation for localised breast cancer). The treatment options can                                                                                                                                                                                         | Medication                              | 13             | (37,44,50–52,56,58,62,63,124–126)                                    |
|                              |                                                                                                                                                                                                                                                                                                                                                                               | Dialysis                                | 6              | (46,57,127–130)                                                      |
|                              |                                                                                                                                                                                                                                                                                                                                                                               | Surgery                                 | 4              | (131–134)                                                            |
|                              |                                                                                                                                                                                                                                                                                                                                                                               | Chemotherapy                            | 5              | (35,66,135–137)                                                      |
|                              |                                                                                                                                                                                                                                                                                                                                                                               | Non-pharmacological / conservative      | 3              | (138–140)                                                            |

|                                                                |                                                                                                                                                                                                                                                                    |                                           |    |                             |
|----------------------------------------------------------------|--------------------------------------------------------------------------------------------------------------------------------------------------------------------------------------------------------------------------------------------------------------------|-------------------------------------------|----|-----------------------------|
|                                                                | include any intervention with a therapeutic aim.                                                                                                                                                                                                                   | Medication Device                         | 1  | (141)                       |
| Involvement in the Shared Decision Making Process Preferences* | Preferences regarding the degree of involvement in discussions with health professionals about the options for treatment, the benefits and harms of each therapy, and making collaborative decisions about how to proceed.                                         | Patterns of engagement                    | 21 | (37,50,55,57–61,66,142–151) |
|                                                                |                                                                                                                                                                                                                                                                    | Patient Decision Aid                      | 1  | (65)                        |
|                                                                |                                                                                                                                                                                                                                                                    | Information                               | 4  | (48,61,146,152)             |
|                                                                |                                                                                                                                                                                                                                                                    | Communication with Providers              | 1  | (49)                        |
| Healthcare Service Preferences                                 | Preferences related to the quality of care and the planning and delivery of the services the health system provides.                                                                                                                                               | Processes of care                         | 10 | (54,153–161)                |
|                                                                |                                                                                                                                                                                                                                                                    |                                           | 2  | (156,160)                   |
|                                                                |                                                                                                                                                                                                                                                                    | - Site of care                            | 1  | (157)                       |
|                                                                |                                                                                                                                                                                                                                                                    | - Type of social support                  | 3  | (153,156,161)               |
|                                                                |                                                                                                                                                                                                                                                                    | - Type of caregiver / provider            | 5  | (54,153–155)                |
|                                                                |                                                                                                                                                                                                                                                                    | - Continuity and Access                   | 1  | (159)                       |
|                                                                |                                                                                                                                                                                                                                                                    | - Guiding principles                      |    |                             |
|                                                                |                                                                                                                                                                                                                                                                    | Service models                            | 2  | (31,162)                    |
|                                                                |                                                                                                                                                                                                                                                                    | - Chronic Care Model                      | 1  | (31)                        |
|                                                                |                                                                                                                                                                                                                                                                    | - Cardiac Rehabilitation                  | 1  | (162)                       |
| Health Outcome Prioritisation & Goal Setting                   | Preferences regarding personal health and life outcomes (e.g., function, social activities, and symptom relief) that people hope to achieve through their health care. Health outcome goals that patients prioritise within the context of their care preferences. | Life & Health Goals                       | 6  | (53,64,163–166)             |
|                                                                |                                                                                                                                                                                                                                                                    | Health Outcome Prioritisation             | 10 | (47,62,75,167–171)          |
|                                                                |                                                                                                                                                                                                                                                                    | - Preferred tools                         | 1  | (167)                       |
|                                                                |                                                                                                                                                                                                                                                                    | Collaborative Goal Setting                | 3  | (123,172,173)               |
|                                                                |                                                                                                                                                                                                                                                                    | - Patient, physician, caregiver agreement | 1  | (172)                       |
| Screening & Diagnostic Tests Preferences                       | Preferences that involve the decision whether or not to undergo a screening or diagnostic test.                                                                                                                                                                    | Screening Test                            | 1  | (174)                       |
|                                                                |                                                                                                                                                                                                                                                                    | - Cancer Screening                        | 1  | (174)                       |

\*Three studies are listed twice as they were assigned two different codes

273 *End-of-life care preferences*

274 The largest evidence cluster comprised the 51 studies (34 %) addressing end-of-life care  
275 preferences, most of which were in specialised care settings (41/51 studies) (Figure 2). Content  
276 analysis of this preference revealed that advance care planning (51), in which multimorbid  
277 patients with advanced chronic diseases were asked how they would like to be cared for in the  
278 final months of their lives, was the main theme (Table 2). The most common theme within this  
279 cluster concerned preferences for specific life-sustaining treatments (29/51) (28,32–  
280 34,36,42,45,67,68,70,71,76,77,79,81,83,84,87–90,92–95,98–101), such as cardiopulmonary  
281 resuscitation or mechanical ventilation. Additional topics in this cluster addressed themes such  
282 as the preferred place of death (e.g. home versus hospice) (67).

284 *Self-management preferences*

285 The second largest evidence cluster included 34 studies (22 %) and addressed patients' self-  
286 management priorities, defined as activities that an individual undertakes to maintain or reduce  
287 the effect of a disease/s on their health status (175). Most studies about self-management  
288 preferences were conducted in primary care (21/34). The only intervention study in the  
289 evidence map (113) used a cluster-randomised design to evaluate whether structured priority-  
290 setting consultations led to a sustainable reconciliation of diverging physician-patient views on  
291 the importance of health problems. Overall, content analysis of this evidence cluster revealed  
292 five key themes: (i) patients' prioritisation of their multiple health problems (20/34)  
293 (39,40,54,56,63,103,105–118), as an example of which patients were asked how they prioritised  
294 their osteoarthritis over their other conditions (117), (ii) patients' preferences regarding self-  
295 management of their medications (8/34) (51,52,56,63,119–122) and, for instance, its  
296 association with treatment adherence (51), (iii) patients' self-care behaviours (3/34) (53,64,123)

1  
2  
3 297 aimed at accomplishing their life goals (53), (iv) characteristics of eHealth support tools (2/34)  
4  
5 298 (30,104) to help patients self-manage their multiple health conditions (104) and (v) changes in  
6  
7 299 patients' choices resulting from changing circumstances (2/34) (29,30).  
8  
9

10 300

11 301 *Treatment preferences*

12 302 Thirty-two studies (22 %) investigated a variety of treatment preferences concerning (i)  
13  
14 303 medication (13/32) (37,44,50–52,56,58,62,63,124–126), perhaps for a specific blood pressure-  
15  
16 304 lowering drug due to its characteristics (e.g. effects and dose schedule) (124), (ii) dialysis as a  
17  
18 305 treatment option in end-stage renal disease (6/32) (46,57,127–130), (iii) surgery (4/32) (131–  
19  
20 306 134), such as a decision in favour of implantable cardioverter-defibrillators or joint  
21  
22 307 replacement, (iv) chemotherapy (5/32) (35,66,135–137), for which studies may have examined  
23  
24 308 preferences in adjuvant cancer treatments and, (v) non-pharmacological / conservative  
25  
26 309 interventions (3/32) (138–140), such as studies exploring preferences for activity interventions  
27  
28 310 (138).  
29  
30  
31  
32  
33

34 311

35 312 *Involvement in the shared decision making process*

36  
37 313 Twenty-five (17 %) studies explored how patients preferred to be involved in the shared  
38  
39 314 decision making process. Studies in this cluster investigated preferred (i) patterns of  
40  
41 315 engagement (21/25) (37,50,143–151,55,57–61,66,142), (ii) information (4/25) (48,61,146,152),  
42  
43 316 (iii) communication with providers (1/25) (49) and, (iv) patient decision aids (1/25) (65).  
44  
45  
46  
47  
48

49 317

50 318 *Healthcare service preferences*

51  
52 319 Twelve studies (8 %) focused on preferences for certain healthcare services, and specifically (i)  
53  
54 320 preferred care processes (10/12) (54,153–161), such as continuity of care, accessibility and  
55  
56 321 acceptance of the substitution of a physician by nurses and, (ii) service models (2/12) (31,162),  
57  
58  
59  
60



1  
2  
3 322 perhaps asking patients about their preferences regarding Chronic Care Model

4  
5 323 recommendations (31).

6  
7 324

8  
9 325 *Health outcome prioritisation and goal setting*

10 326 Nineteen studies (13 %) investigated health outcome prioritisation and goal setting. These may

11  
12 327 have been (i) patients' holistic goals for their lives or with respect to their various diseases

13  
14 328 (6/19) (53,64,163–166), (ii) health outcome prioritisation (10/19) (47,62,75,167–171,176,177) -

15  
16 329 one study in particular addressed the tools patients preferred to use to prioritise health

17  
18 330 outcomes (167) and (iii) collaborative goal setting among patients, physicians and caregivers

19  
20 331 (3/19) (123,172,173).

21  
22 332

23  
24 333 *Screening and diagnostic tests*

25  
26 334 One study (174) investigated cancer screening preferences among patients with

27  
28 335 multimorbidity.

29  
30 336

31  
32 337 [About here: Figure 2 Types of preference investigated in the included studies by setting and

33  
34 338 study design]

35  
36 339

37  
38 340 **DISCUSSION AND CONCLUSION**

39  
40 341 This work provides a systematic overview of research on health-related preferences of older

41  
42 342 patients with multimorbidity.

43  
44 343

45  
46 344 **Evidence clusters**

47  
48 345 We identified 152 studies, most of which were published within the last decade and conducted

49  
50 346 in developed countries. The vast majority of studies included in the evidence map used a

51  
52 347 qualitative or cross-sectional quantitative design (126/152).

1  
2  
3 348 Our clustering approach revealed that studies of patient preference focused on seven areas:  
4  
5 349 end-of life care, self-management, treatment, involvement in shared decision making, health  
6  
7 350 outcome prioritisation/goal setting, healthcare service delivery and screening/diagnostic  
8  
9 351 testing. The size of the evidence clusters varied widely (from 1 to 51 studies) and the research  
10  
11 352 objectives and settings differed considerably.

12  
13  
14 353 The largest and most homogenous cluster was of end-of-life preferences (51/152 studies) and  
15  
16 354 was largely confined to specialised care (41/51). Furthermore, the study objectives revealed  
17  
18 355 one overarching theme (advance care planning) and were relatively uniform compared with  
19  
20 356 the other clusters.

21  
22  
23 357 Self-management and treatment preferences were the second (34/51) and third (32/51)  
24  
25 358 largest clusters respectively. Although studies about self-management preferences were  
26  
27 359 relatively homogeneous in terms of study setting (they were mostly conducted in primary care  
28  
29 360 (21/34)), we found considerable variability in the overarching themes. Treatment preferences  
30  
31 361 were rather heterogeneous, with the cluster containing a variety of settings and themes.

32  
33  
34 362 Overall, we identified clusters of evidence. However, as evidence maps do not permit the  
35  
36 363 critical appraisal of the robustness of evidence, the evidence clusters (i.e. studies) still require  
37  
38 364 verification (19).

39  
40  
41 365

#### 42 43 366 **Evidence gaps**

44  
45 367 Longitudinal studies were rare and the few that did observe changes in preference over time  
46  
47 368 generally concerned end-of-life care preferences (33,43,45,71,76,79). The only intervention  
48  
49 369 study we identified (113) highlighted the fragility of prioritisation processes over time, and  
50  
51 370 showed that health priorities shared by patients and physicians were often not sustainable  
52  
53 371 two weeks after an intervention. Preferences tend to change when chronic conditions worsen  
54  
55 372 (33,43,45,71,76,79), additional diagnoses are made that lead patients to prioritise a new  
56  
57 373 condition over existing ones (103), or new information about treatment options is obtained  
58  
59  
60

1  
2  
3 374 (37). However, although crucial in clinical decision making, it is unclear how and why patient  
4  
5 375 preferences change significantly over time. High quality longitudinal studies are needed to  
6  
7 376 help physicians deal with changing preferences and to reassess preference-sensitive decisions.  
8  
9 377 We identified a further research gap in a lack of studies in older patients with multimorbidity  
10  
11 378 that test the effectiveness (i) of interventions using different methods to elicit/construct  
12  
13 379 preferences, and (ii) of (complex) interventions that proactively consider patient preferences  
14  
15 380 among patient-relevant outcomes.  
16  
17 381 The smallest cluster (containing only one study) concerned the preferences of older patients  
18  
19 382 with multimorbidity with respect to screening or diagnostic tests (174). This finding is  
20  
21 383 surprising, as the additional health-related burden of screening and diagnostic tests can be  
22  
23 384 substantial, and it is well-known that the risk-benefit ratio of such tests can be highly  
24  
25 385 preference-sensitive (13).

26  
27 386 It is worthy of note that end-of-life care preferences were mostly assessed in specialised  
28  
29 387 ambulatory care. As palliative care is a core task in primary care, we would have expected  
30  
31 388 more studies to address such end-of-life preferences in this setting (178).  
32  
33  
34  
35

36  
37 389

### 39 **Comparison with other studies**

40  
41 391 This is the first evidence map of health-related preferences in older patients with  
42  
43 392 multimorbidity. Although previously published evidence summaries, such as scoping or  
44  
45 393 systematic reviews, partially addressed specific topics relating to some of the clusters  
46  
47 394 identified in this evidence map, none focused on older patients with multimorbidity.  
48  
49 395 Four systematic reviews explored preferences in end-of-life care (as well as other preferences,  
50  
51 396 such as involvement in shared decision making and goal setting): (i) Puts et al. (179,180)  
52  
53 397 systematically reviewed factors influencing older adults' (not necessarily multimorbid) decision  
54  
55 398 to accept or refuse cancer treatment, (ii) de Decker et al. (181) confirmed an association of the  
56  
57 399 wish not to be resuscitated with multimorbidity, (iii) Singh et al. (182) conducted a meta-  
58  
59  
60

1  
2  
3 400 analysis on the roles cancer patients (not necessarily multimorbid) prefer to play in treatment  
4  
5 401 decision-making, and (iv) Vermunt et al. (183) evaluated studies of the effects of interventions  
6  
7 402 that support collaborative goal setting in elderly people with a chronic health condition or  
8  
9 403 multimorbidity, including our only intervention study (113).  
10  
11 404 Most of the evidence summaries of health-related preferences focused on end-of-life care  
12  
13 405 preferences , and specifically its determinants(179–181). Further research should concentrate  
14  
15 406 on the clusters and gaps identified in our evidence map in order to enhance our understanding  
16  
17 407 of the preferences of older patients with multimorbidity.  
18  
19  
20  
21  
22

408

### 409 **Strengths and limitations**

23  
24  
25 410 A major strength of our approach is that we used a sensitive strategy that combined controlled  
26  
27 411 terms (i.e. a defined vocabulary to index and retrieve information from the included electronic  
28  
29 412 databases) and free-text searches in all relevant databases. Furthermore, we did not apply any  
30  
31 413 restrictions to publication language, design, or geographical location of the studies.  
32  
33

34 414 Additionally, we searched for unpublished studies in registries and contacted authors of  
35  
36 415 conference papers.

37  
38 416 However, we addressed a broad topic with incomplete indexing (both, multimorbidity and  
39  
40 417 patient preferences) and may have missed studies. In particular, we did not include search  
41  
42 418 terms for specific measures of preference (e.g., analytic hierarchy process, discrete choice  
43  
44 419 experiment, conjoint analyses) in electronic searches, because test searches including them  
45  
46 420 did not increase sensitivity. Furthermore, we did not search grey literature, as this approach  
47  
48 421 would not have identified additional relevant studies that could have justified the enormous  
49  
50 422 effort involved (184).  
51  
52

53  
54 423 Despite the experience gathered in the pilot study (published elsewhere), the use of a lower  
55  
56 424 age limit of at least 60 years was difficult to operationalise, as studies often included a wide  
57  
58  
59  
60

1  
2  
3 425 age range but did not always report separate results for older patients. When the age group  
4  
5 426 was unclear, we did not include the study.  
6  
7 427 Furthermore, we used an iterative process to develop our evidence clusters and the identified  
8  
9 428 clusters and their definitions were agreed on by all authors. However, inherent to the methods  
10  
11 429 used, we cannot rule out some subjectivity.  
12  
13

14 430

### 16 431 **Conclusions and further research outlook**

18 432 This evidence map provides the first systematic overview of empirical investigations  
19  
20 433 concerning health-related preferences of older patients with multimorbidity. Their objectives  
21  
22 434 addressed a broad range of relevant topics across all settings and used predominantly cross-  
23  
24 435 sectional and observational qualitative and quantitative methods. Our evidence map also  
25  
26 436 revealed gaps, both in general – such as the scarcity of longitudinal studies to investigate  
27  
28 437 changes in preferences over time, and of intervention studies, which, with one exception  
29  
30 438 (113), failed to develop and test interventions to support the construction of health-related  
31  
32 439 preferences in this population. More specifically, we found a remarkably low number of  
33  
34 440 studies addressing preferences concerning end-of-life care in a primary care setting, as well as  
35  
36 441 preferences related to screening and diagnostic testing. Furthermore, the included studies  
37  
38 442 varied considerably in terms of terminology (e.g. preferences, priorities, views, perceptions)  
39  
40 443 and decision-making components and concepts (e.g. trade-offs, decision regret, goal setting).  
41  
42 444 These require further elucidation.  
43  
44  
45  
46  
47

48 445

### 50 446 **FULL REFERENCES**

- 51  
52 447 1. van den Akker M, Buntinx F, Knottnerus JA. Comorbidity or multimorbidity: what's in a  
53  
54 448 name? A review of literature. *Eur J Gen Pract.* 1996 Jan 11;2(2):65–70.  
55  
56 449 2. Weiss CO, Varadhan R, Puhan MA, Vickers A, Bandeen-Roche K, Boyd CM, et al.  
57  
58 450 Multimorbidity and evidence generation. *J Gen Intern Med.* 2014;29(4):653–60.  
59  
60

- 1  
2  
3 451 3. Fortin M, Bravo G, Hudon C, Vanasse A, Lapointe L. Prevalence of multimorbidity  
4  
5 452 among adults seen in family practice. *Ann Fam Med*. 2005;3(3):223–8.
- 6  
7 453 4. Vogeli C, Shields AE, Lee TA, Gibson TB, Marder WD, Weiss KB, et al. Multiple Chronic  
8  
9 454 Conditions: Prevalence, Health Consequences, and Implications for Quality, Care  
10  
11 455 Management, and Costs. *J Gen Intern Med*. 2007 Dec 16;22(S3):391–5.
- 12  
13  
14 456 5. N’Goran AA, Déruaz-Luyet A, Haller DM, Zeller A, Rosemann T, Streit S, et al. Comparing  
15  
16 457 the self-perceived quality of life of multimorbid patients and the general population  
17  
18 458 using the EQ-5D-3L. Liu C, editor. *PLoS One*. 2017 Dec 19;12(12):e0188499.
- 19  
20  
21 459 6. May CR, Eton DT, Boehmer K, Gallacher K, Hunt K, MacDonald S, et al. Rethinking the  
22  
23 460 patient: using Burden of Treatment Theory to understand the changing dynamics of  
24  
25 461 illness. *BMC Health Serv Res*. 2014 Dec 26;14(1):281.
- 26  
27  
28 462 7. Sav A, King MA, Whitty JA, Kendall E, McMillan SS, Kelly F, et al. Burden of treatment for  
29  
30 463 chronic illness: a concept analysis and review of the literature. *Heal Expect*. 2015  
31  
32 464 Jun;18(3):312–24.
- 33  
34  
35 465 8. Zulman DM, Asch SM, Martins SB, Kerr EA, Hoffman BB, Goldstein MK. Quality of care  
36  
37 466 for patients with multiple chronic conditions: the role of comorbidityinterrelatedness. *J*  
38  
39 467 *Gen Intern Med*. 2013;29(3):529–37.
- 40  
41  
42 468 9. Boyd CM, Darer J, Boulton C, Fried LP, Boulton L, Wu AW. Clinical Practice Guidelines and  
43  
44 469 Quality of Care for Older Patients. *N Engl J Med*. 2014;294(6):716–24.
- 45  
46  
47 470 10. Muth C, Kirchner H, van den Akker M, Scherer M, Glasziou PP. Current guidelines poorly  
48  
49 471 address multimorbidity: pilot of the interaction matrix method. *J Clin Epidemiol*. 2014  
50  
51 472 Nov;67(11):1242–50.
- 52  
53  
54 473 11. Institute of Medicine. *Crossing the quality chasm: a new health system for the 21st*  
55  
56 474 *century*. Washington DC: National Academy Press; 2001.
- 57  
58  
59 475 12. Muth C, van den Akker M, Blom JW, Mallen CD, Rochon J, Schellevis FG, et al. The  
60  
476 *Ariadne principles: how to handle multimorbidity in primary care consultations*. *BMC*

- 1  
2  
3 477 Med. 2014 Dec 8;12(1):223.  
4  
5 478 13. Muth C, Blom JW, Smith SM, Johnell K, Gonzalez-Gonzalez AI, Nguyen TS, et al.  
6  
7 479 Evidence supporting the best clinical management of patients with multimorbidity and  
8  
9 480 polypharmacy: a systematic guideline review and expert consensus. *J Intern Med*.  
10  
11 481 2019;283(3):272–88.  
12  
13  
14 482 14. Valderas JM, Gangannagaripalli J, Nolte E, Boyd C, Roland M, Sarria-Santamera A, et al.  
15  
16 483 Quality of care assessment for people with multimorbidity. *J Intern Med* [Internet].  
17  
18 484 2019 Feb 5;joim.12881. Available from:  
19  
20 485 <https://onlinelibrary.wiley.com/doi/abs/10.1111/joim.12881>  
21  
22  
23 486 15. Lichtenstein S, Slovic P. *The Construction of Preference*. Cambridge; New York:  
24  
25 487 Cambridge University Press; 2006.  
26  
27 488 16. Wegwarth O, Gigerenzer G. Statistical illiteracy in doctors. In: Gigerenzer G, Muir Gray J,  
28  
29 489 editors. *Better doctors, better patients, better decisions: Envisioning health care 2020*  
30  
31 490 *Strüngmann Forum Report*. 1st Editio. Cambridge, UK: MIT Press; 2011. p. 137–51.  
32  
33  
34 491 17. Hoffmann TC, Del Mar C. Patients' Expectations of the Benefits and Harms of  
35  
36 492 Treatments, Screening, and Tests. *JAMA Intern Med*. 2015 Feb 1;175(2):274.  
37  
38  
39 493 18. Tinetti ME, Fried TR, Boyd CM. Designing Health Care for the Most Common Chronic  
40  
41 494 Condition—Multimorbidity. *JAMA*. 2012 Jun 20;307(23).  
42  
43 495 19. Miake-Lye IM, Hempel S, Shanman R, Shekelle PG. What is an evidence map? A  
44  
45 496 systematic review of published evidence maps and their definitions, methods, and  
46  
47 497 products. *Syst Rev*. 2016;5(1):28.  
48  
49  
50 498 20. González-González AI, Schmucker C, Blom J, van den Akker M, Nguyen TS, Nothacker J,  
51  
52 499 et al. Health-related preferences of older patients with multimorbidity: the protocol for  
53  
54 500 an evidence map. *BMJ Open*. 2019 Sep 3;9(9):e029724.  
55  
56  
57 501 21. Tricco AC, Lillie E, Zarin W, O'Brien KK, Colquhoun H, Levac D, et al. PRISMA Extension  
58  
59 502 for Scoping Reviews (PRISMA-ScR): Checklist and Explanation. *Ann Intern Med*. 2018  
60

- 1  
2  
3 503 Oct 2;169(7):467.  
4  
5 504 22. U.S.National Library of Medicine. ClinicalTrials.gov [Internet]. Available from:  
6  
7 505 <http://clinicaltrials.gov/>  
8  
9  
10 506 23. World Health Organization. International Clinical Trials Registry Platform (ICTRP)  
11  
12 507 [Internet]. Available from: <http://www.who.int/ictrp/en/>  
13  
14 508 24. Holland AE, Harrison SL, Brooks D. Multimorbidity, frailty and chronic obstructive  
15  
16 509 pulmonary disease. *Chron Respir Dis*. 2016 Nov 26;13(4):372–82.  
17  
18 510 25. Chamberlain AM, St Sauver JL, Gerber Y, Manemann SM, Boyd CM, Dunlay SM, et al.  
19  
20 511 Multimorbidity in Heart Failure: A Community Perspective. *Am J Med*. 2016;128(1):38–  
21  
22 512 45.  
23  
24 513 26. Fraser S, Taal M. Multimorbidity in people with chronic kidney disease: implications for  
25  
26 514 outcomes and treatment. *Curr Opin Nephrol Hypertens*. 2016;25(6):465–72.  
27  
28 515 27. Erlingsson C, Brysiewicz P. A hands-on guide to doing content analysis. *African J Emerg*  
29  
30 516 *Med* [Internet]. 2017 Sep;7(3):93–9. Available from:  
31  
32 517 <https://linkinghub.elsevier.com/retrieve/pii/S2211419X17300423>  
33  
34 518 28. Brunner-La Rocca H-P, Rickenbacher P, Muzzarelli S, Schindler R, Maeder MT, Jeker U,  
35  
36 519 et al. End-of-life preferences of elderly patients with chronic heart failure. *Eur Heart J*.  
37  
38 520 2012;33:752–9.  
39  
40 521 29. Baxter K. Changing choices: disabled and chronically ill people’s experiences of  
41  
42 522 reconsidering choices. *Chronic Illn*. 2012;9(2):116–32.  
43  
44 523 30. Morris RL, Sanders C, Kennedy AP, Rogers A. Shifting priorities in multimorbidity: a  
45  
46 524 longitudinal qualitative study of patient’s prioritization of multiple conditions. *Chronic*  
47  
48 525 *Illn*. 2011 Jun 22;7(2):147–61.  
49  
50 526 31. Krucien N, Le Vaillant M, Pelletier-Fleury N. What are the patients’ preferences for the  
51  
52 527 Chronic Care Model? An application to the obstructive sleep apnoea syndrome. *Heal*  
53  
54 528 *Expect*. 2015 Dec;18(6):2536–48.  
55  
56  
57  
58  
59  
60



- 1  
2  
3 529 32. Krumholz HM, Phillips RS, Hamel MB, Teno JM, Bellamy P, Broste SK, et al.  
4  
5 530 Resuscitation Preferences Among Patients With Severe Congestive Heart Failure.  
6  
7 531 Circulation. 1998;98:648–55.  
8  
9  
10 532 33. Tang ST, Wen F, Hsieh C, Chou W. Preferences for Life-Sustaining Treatments and  
11  
12 533 Associations With Accurate Prognostic Awareness and Depressive Symptoms in  
13  
14 534 Terminally Ill Cancer Patients' Last Year of Life. J Pain Symptom Manage. 2016;51(1):41-  
15  
16 535 51.e1.  
17  
18 536 34. Wright AA, Mack JW, Kritek PA, Balboni TA. Influence of Patients' Preferences and  
19  
20 537 Treatment Site on Cancer Patients' End-of-Life Care. Cancer. 2010;116:4656–63.  
21  
22  
23 538 35. Zafar SY, Malin JL, Grambow SC, Abbot DH, Kolimaga, Jane T, Zullig LL, Weeks JC, et al.  
24  
25 539 Chemotherapy Use and Patient Treatment Preferences in Advanced Colorectal Cancer.  
26  
27 540 Cancer. 2013;119:854–62.  
28  
29  
30 541 36. Hamel MB, Lynn J, Teno JM, Covinsky KE, Wu AW, Galanos A, et al. Age-Related  
31  
32 542 Differences in Care Preferences, Treatment Decisions, and Clinical Outcomes of  
33  
34 543 Seriously Ill Hospitalized Adults: Lessons from SUPPORT. J Am Geriatr Soc. 2000  
35  
36 544 May;48(S1):S176–82.  
37  
38  
39 545 37. Ainslie N, Beisecker A. Changes in Decision by Elderly Persons Based on Treatment  
40  
41 546 Description. Arch Intern Med. 1994;154:2225–33.  
42  
43 547 38. Fried TR, Tinetti ME, Towle V, O'Leary JR, Iannone L. Effects of Benefits and Harms on  
44  
45 548 Older Persons' Willingness to Take Medication for Primary Cardiovascular Prevention.  
46  
47 549 Arch Intern Med. 2011 May 23;171(10).  
48  
49  
50 550 39. Beverly EA. Incorporating comorbidity, values and preferences into clinical care  
51  
52 551 guidelines designed for older adults living with type 2 diabetes. The Pennsylvania State  
53  
54 552 University; 2008.  
55  
56  
57 553 40. Cheraghi-Sohi S, Bower P, Kennedy A, Morden A, Rogers A, Richardson J, et al. Patient  
58  
59 554 Priorities in Osteoarthritis and Comorbid Conditions: A Secondary Analysis of  
60

- 1  
2  
3 555 Qualitative Data. *Arthritis Care Res (Hoboken)*. 2013;65(6):920–7.  
4  
5 556 41. Fried TR, Bradley EH, Towle VR, Allore H. Understanding the Treatment Preferences of  
6  
7 557 Seriously Ill Patients. *N Engl J Med*. 2002 Apr 4;346(14):1061–6.  
8  
9 558 42. Fried TR, Bradley EH, Towle VR, Emanuel EJ, Emanuel LL. Assessment of Patient  
10  
11 559 Preferences: Integrating Treatments and Outcomes. *J Gerontol*. 2002;57(6):348–54.  
12  
13 560 43. Fried TR, Byers AL, Gallo WT, Ness PH Van, Towle VR, Leary JRO, et al. Prospective Study  
14  
15 561 of Health Status Preferences and Changes in Preferences Over Time in Older Adults.  
16  
17 562 *Arch Intern Med*. 2006;166:890–5.  
18  
19 563 44. Rothman MD, Ness PH Van, Leary JRO, Fried TR. Refusal of Medical and Surgical  
20  
21 564 Interventions by Older Persons with Advanced Chronic Disease. *Soc Gen Intern Med*.  
22  
23 565 2007;22:982–7.  
24  
25 566 45. Fried TR, O’Leary J, Van Ness P, Fraenkel L. Inconsistency Over Time in the Preferences  
26  
27 567 of Older Persons with Advanced Illness for Life-Sustaining Treatment. *J Am Geriatr Soc*  
28  
29 568 [Internet]. 2007 Jul;55(7):1007–14. Available from:  
30  
31 569 <http://doi.wiley.com/10.1111/j.1532-5415.2007.01232.x>  
32  
33 570 46. Morton RL, Snelling P, Webster AC. Dialysis Modality Preference of Patients With CKD  
34  
35 571 and Family Caregivers: A Discrete-Choice Study. *AJKD*. 2012;60(1):102–11.  
36  
37 572 47. van Summeren JJ, Schuling J, Haaijer-Ruskamp FM, Denig P. Outcome prioritisation tool  
38  
39 573 for medication review in older patients with multimorbidity: a pilot study in general  
40  
41 574 practice. *Br J Gen Pract*. 2017 Jul;67(660):e501–6.  
42  
43 575 48. Caldwell PH, Arthur HM, Demers C. Preferences of patients with heart failure for  
44  
45 576 prognosis communication. *Can J Cardiol*. 2007;23(10):791–6.  
46  
47 577 49. Linsky A, Simon SR, Bokhour B. Patient Education and Counseling Patient perceptions of  
48  
49 578 proactive medication discontinuation. *Patient Educ Couns*. 2015;98(2):220–5.  
50  
51 579 50. Linsky A, Simon SR, Stolzmann K, Meterko M. Patient Perceptions of Deprescribing  
52  
53 580 Survey Development and Psychometric Assessment. *Med Care*. 2017;55:306–13.  
54  
55  
56  
57  
58  
59  
60

- 1  
2  
3 581 51. McKillop G, Joy J. Patients' experience and perceptions of polypharmacy in chronic  
4  
5 582 kidney disease and its impact on adherent behaviour. *J Ren Care*. 2013 Dec;39(4):200–  
6  
7 583 7.  
8  
9  
10 584 52. Milic M, Foster A, Rihawi K, Anthony A, Twelves C. ScienceDirect 'Tablet burden' in  
11  
12 585 patients with metastatic breast cancer. *Eur J Cancer*. 2016;55:1–6.  
13  
14 586 53. Morrow AS, Haidet P, Skinner J, Naik AD. Integrating diabetes self-management with  
15  
16 587 the health goals of older adults: A qualitative exploration. *Patient Educ Couns*.  
17  
18 588 2008;72:418–23.  
19  
20  
21 589 54. Noël PH, Frueh BC, Larme AC, Pugh JA. Collaborative care needs and preferences of  
22  
23 590 primary care patients with multimorbidity. *Heal Expect*. 2005 Mar;8(1):54–63.  
24  
25 591 55. Pardon K, Deschepper R, Vander R, Bernheim J, Mortier F, Deliens L. Patient Education  
26  
27 592 and Counseling Preferences of advanced lung cancer patients for patient-centred  
28  
29 593 information and decision-making: A prospective multicentre study in 13 hospitals in  
30  
31 594 Belgium. *Patient Educ Couns*. 2009;77:421–9.  
32  
33  
34 595 56. Rifkin DE, Laws MB, Rao M, Balakrishnan V, Sarnak MJ, Wilson IB. Medication  
35  
36 596 Adherence Behavior and Priorities Among Older Adults With CKD: A Semistructured  
37  
38 597 Interview Study. *Am J Kidney Dis*. 2010;56(3):439–46.  
39  
40  
41 598 57. Song M, Lin F, Gilet CA, Arnold RM, Bridgman JC. Patient perspectives on informed  
42  
43 599 decision-making surrounding dialysis initiation. *Nephrol Dial*. 2013;28:2815–23.  
44  
45 600 58. Tariman JD, Doorenbos A, Schepp KG, Becker PS. Patient, Physician and Contextual  
46  
47 601 Factors Are Influential in the Treatment Decision Making of Older Adults Newly  
48  
49 602 Diagnosed with Symptomatic Myeloma. *Cancer Treat Commun*. 2014;2(2–3):34–47.  
50  
51  
52 603 59. Chiu C, Feuz MA, McMahan RD, Miao Y, Sudore RL. "Doctor, Make My Decisions":  
53  
54 604 Decision Control Preferences, Advance Care Planning, and Satisfaction With  
55  
56 605 Communication Among Diverse Older Adults. *J Pain Symptom Manage*. 2016;51(1):33–  
57  
58 606 40.  
59  
60

- 1  
2  
3 607 60. Clover A, Browne J, Mcerlain P, Vandenberg B. Patient approaches to clinical  
4  
5 608 conversations in the palliative care setting. *J Adv Nurs*. 2004;48(4):333–41.  
6  
7 609 61. Efficace F, Gaidano G, Sprangers M, Cottone F, Breccia M, Voso MT, et al. Preference  
8  
9 610 for involvement in treatment decisions and request for prognostic information in newly  
10  
11 611 diagnosed patients with higher-risk myelodysplastic syndromes. *Ann Oncol*.  
12  
13 612 2014;25:1258–65.  
14  
15  
16 613 62. Fried TR, McGraw S, Agostini J V, Tinetti ME. Views of older persons with multiple  
17  
18 614 morbidities on competing outcomes and clinical decision-making. *J Am Geriatr Soc*.  
19  
20 615 2008;56(10):1839–44.  
21  
22  
23 616 63. Hopper I, Fracp M, Silva C De, Beds RN, Skiba M, Sec B, et al. Attitudes of Patients and  
24  
25 617 Prescribing Clinicians to Polypharmacy and Medication Withdrawal in Heart Failure. *J*  
26  
27 618 *Card Fail*. 2016;22(9):9–10.  
28  
29  
30 619 64. Huang ES, Gorawara-bhat R, Chin MH. Self-Reported Goals of Older Patients with Type  
31  
32 620 2 Diabetes Mellitus. *J Am Geriatr Soc*. 2005;53:306–11.  
33  
34  
35 621 65. Jones J, Nowels C, Kutner JS, Matlock DD. Shared decision making and the use of a  
36  
37 622 patient decision aid in advanced serious illness: provider and patient perspectives. *Heal*  
38  
39 623 *Expect*. 2014;18:3236–47.  
40  
41  
42 624 66. Jorgensen ML, Young JM, Solomon MJ. Adjuvant chemotherapy for colorectal cancer:  
43  
44 625 age differences in factors influencing patients' treatment decisions. *Patient Prefer*  
45  
46 626 *Adherence*. 2013;7:827–34.  
47  
48 627 67. Casarett D, Ness ÅPH Van, Leary JRO, Fried TR. Are Patient Preferences for Life-  
49  
50 628 Sustaining Treatment Really a Barrier to Hospice Enrollment for Older Adults with  
51  
52 629 Serious. *J Am Geriatr Soc*. 2006;54:472–8.  
53  
54  
55 630 68. Cosgriff JA, Pisani M, Bradley EH, Leary JRO, Fried TR. The Association between  
56  
57 631 Treatment Preferences and Trajectories of Care at the End-of-Life Description of  
58  
59 632 Participants. *J Gen Intern Med*. 2007;22(11):1566–71.  
60

- 1  
2  
3 633 69. Davison SN. End-of-Life Care Preferences and Needs : Perceptions of Patients with  
4  
5 634 Chronic Kidney Disease. *Clin J Am Soc Nephrol*. 2010;5:195–204.  
6  
7 635 70. Downey L, Au DH, Curtis JR, Engelberg RA. Life-Sustaining Treatment Preferences:  
8  
9 636 Matches and Mismatches Between Patients’ Preferences and Clinicians’ Perceptions. *J*  
10  
11 637 *Pain Symptom Manage* [Internet]. 2013;46(1):9–19. Available from:  
12  
13 638 <http://dx.doi.org/10.1016/j.jpainsymman.2012.07.002>  
14  
15  
16 639 71. Dunlay SM, Swetz KM, Redfield MM. Resuscitation Preferences in Community Patients  
17  
18 640 with Heart Failure. *Circ Cardiovasc Qual Outcomes*. 2014;7(3):353–9.  
19  
20 641 72. Elie D, Marino A, Torres-Platas SG, Noohi S, Semeniuk T, Segal M, et al. End-of-Life Care  
21  
22 642 Preferences in Patients with Severe and Persistent Mental Illness and Chronic Medical  
23  
24 643 Conditions: A Comparative Cross-Sectional Study. *Am J Geriatr Psychiatry*. 2018  
25  
26 644 Jan;26(1):89–97.  
27  
28 645 73. Etkind SN, Bristowe K, Bailey K, Selman LE, Murtagh FEM. How does uncertainty shape  
29  
30 646 patient experience in advanced illness? A secondary analysis of qualitative data. *Palliat*  
31  
32 647 *Med*. 2017;31(2):171–80.  
33  
34  
35 648 74. Fried TR, Gillick MR. Medical Decision-Making in the Last Six Months of Life: Choices  
36  
37 649 about Limitation of Care. *J Am Geriatr Soc*. 1994;42:303–7.  
38  
39 650 75. Fried TR, Bradley EH. What Matters to Seriously Ill Older Persons Making End-of-Life  
40  
41 651 Treatment Decisions?: A Qualitative Study. *J Palliat Med*. 2003;6(2):237–44.  
42  
43  
44 652 76. Fried TR, Ness PH Van, Byers AL, Towle VR, Leary JRO, Dubin JA. Changes in Preferences  
45  
46 653 for Life-Sustaining Treatment Among Older Persons with Advanced Illness. *Soc Gen*  
47  
48 654 *Intern Med*. 2007;22:495–501.  
49  
50  
51 655 77. Hamel MB, Teno JM, Goldman L, Lynn J, Davis RB, Galanos AN, et al. Patient Age and  
52  
53 656 Decisions To Withhold Life-Sustaining Treatments from Seriously Ill, Hospitalized Adults.  
54  
55 657 *Ann Intern Med*. 1999;130:116–25.  
56  
57  
58 658 78. Janssen D, Curtis JR, Au DH, Spruit MA, Downey L, Engelberg RA. Patient–clinician  
59  
60

- 1  
2  
3 659 communication about end-of-life care for Dutch and US patients with COPD. *Eur Respir*  
4  
5 660 *J*. 2011;38(2):268–76.  
6  
7 661 79. Janssen DJA, Spruit MA, Schols JMGA, Cox B, Nawrot TS, Curtis JR, et al. Predicting  
8  
9 662 Changes in Preferences for Life-Sustaining Treatment Among Patients With Advanced  
10  
11 663 Chronic Organ Failure. *Chest*. 2012 May;141(5):1251–9.  
12  
13  
14 664 80. Janssen DJA, Spruit MA, Schols JMGA. Insight Into Advance Care Planning for Patients  
15  
16 665 on Dialysis. *J Pain Symptom Manage*. 2013;45(1):104–13.  
17  
18 666 81. Klindtworth K, Oster P, Hager K, Krause O, Bleidorn J, Schneider N. Living with and dying  
19  
20 667 from advanced heart failure: understanding the needs of older patients at the end of  
21  
22 668 life. *BMC Geriatr*. 2015;15:125.  
23  
24  
25 669 82. Lee JSW, Lam LCW, Tang CSH. Attitudes of Demented and Non-demented Chinese  
26  
27 670 Elderly Subjects Towards End-of-life Decision Making. *Hong Kong J Psychiatry*.  
28  
29 671 2006;16(2):45–9.  
30  
31  
32 672 83. Li W, Ng HL, Li W, Piano AN, Karim SA, Dip A. Treatment Preferences at the End-of-Life  
33  
34 673 in Parkinson' s Disease Patients. *Mov Disord Clin Pract*. 2016;3(5):483–9.  
35  
36  
37 674 84. Lynn J, Ely EW, Zhong Z, Landrum K, Mph M, Dawson N V, et al. Living and Dying with  
38  
39 675 Chronic Obstructive Pulmonary Disease. *J Am Geriatr Soc*. 2000;48:S91–100.  
40  
41 676 85. Maida V, Peck J, Ennis M, Brar N, Maida AR. Preferences for active and aggressive  
42  
43 677 intervention among patients with advanced cancer. *BMC Cancer*. 2010;10:592.  
44  
45  
46 678 86. McPherson CJ, Hadjistavropoulos T, Devereaux A, Lobchuk MM. A qualitative  
47  
48 679 investigation of the roles and perspectives of older patients with advanced cancer and  
49  
50 680 their family caregivers in managing pain in the home. *BMC Palliat Care*. 2014 Dec  
51  
52 681 8;13(1):39.  
53  
54  
55 682 87. Moss AH, Hozayen O, King K, Holley JL, Schmidt RJ. Attitudes of Patients Toward  
56  
57 683 Cardiopulmonary Resuscitation in the Dialysis Unit. *Am J Kidney Dis*. 2001;38(4):847–  
58  
59 684 52.  
60

- 1  
2  
3 685 88. Obrien LA, Grisso JA, Maislin G, Lapann K, Karol P, Greco PJ, et al. Nursing Home  
4  
5 686 Residents' Preferences for Life-Sustaining Treatments. *JAMA*. 2015;274:1775–9.  
6  
7 687 89. Ostermann ME, Nelson SR. Haemodialysis patients' views on their resuscitation status.  
8  
9 688 *Nephrol Dial Transpl*. 2003;18:1644–7.  
10  
11  
12 689 90. Parr JD, Zhang B, Nilsson ME, Paulk E, Prigerson HG, Ph D. The Influence of Age on the  
13  
14 690 Likelihood of Receiving. *J Palliat Med*. 2010;13(6):719–26.  
15  
16 691 91. Piamjariyakul U, Myers S, Werkowitch M, Smith CE. End-of-life preferences and  
17  
18 692 presence of advance directives among ethnic populations with severe chronic  
19  
20 693 cardiovascular illnesses. *Eur J Cardiovasc Nurs*. 2014;13(2):185–9.  
21  
22  
23 694 92. Rahemi Z, Williams CL, Tappen RM, Engstrom GA. Health-Related Decisions for Serious  
24  
25 695 Illness Among Ethnically Diverse Older Adults. *Adv Nurs Sci*. 2018;41(1):84–97.  
26  
27 696 93. Reinke LF, Slatore CG, Udris EM, Moss BR, Johnson EA, Au DH. The Association of  
28  
29 697 Depression and Preferences for Life-Sustaining Treatments in Veterans with Chronic  
30  
31 698 Obstructive Pulmonary Disease. *J Pain Symptom Manage*. 2011;41(2):402–11.  
32  
33  
34 699 94. Sharma R, Jayathissa S, Weatherall M. Cardiopulmonary resuscitation knowledge and  
35  
36 700 opinions on end of life decision making of older adults admitted to an acute medical  
37  
38 701 service. *NZMJ*. 2016;129(1428):25–35.  
39  
40  
41 702 95. Stapleton RD, Nielsen EL, Engelberg RA. Association of Depression and Life- Sustaining  
42  
43 703 Treatment Preferences in Patients With COPD. *Chest*. 2005;127(1):328–34.  
44  
45 704 96. Sudore RL, Schillinger D, Knight SJ, Fried TR, Sudore RL, Schillinger D, et al. Uncertainty  
46  
47 705 About Advance Care Planning Treatment Preferences Among Diverse Older Adults  
48  
49 706 Uncertainty About Advance Care Planning Treatment Preferences Among Diverse Older  
50  
51 707 Adults. *J Health Commun*. 2010;15:159–71.  
52  
53  
54 708 97. Tamura MK, Goldstein MK, Eliseo JP. Preferences for dialysis withdrawal and  
55  
56 709 engagement in advance care planning within a diverse sample of dialysis patients.  
57  
58 710 *Nephrol Dial Transpl*. 2010;25:237–42.  
59  
60

- 1  
2  
3 711 98. Tang ST, Liu T, Wen F, Hsu C. A Decade of Changes in Preferences for Life-Sustaining  
4  
5 712 Treatments Among Terminally Ill Patients With Cancer. *J Natl Compr Canc Netw*.  
6  
7 713 2015;13(12):1510–8.  
8  
9 714 99. Teno JM, Fisher E, Hamel B. Decision-Making and Outcomes of Prolonged ICU Stays in  
10  
11 715 Seriously Ill Patients. *JAGS*. 2000;48:70–4.  
12  
13 716 100. Uhlmann RF, Robert A. Perceived Quality of Life and Preferences for Treatment in Older  
14  
15 717 Adults Life-Sustaining. *Arch Intern Med*. 1991;151:80–2.  
16  
17 718 101. Weeks JC, Cook EF, Day SJO, Peterson LM, Wenger N, Reding D, et al. Relationship  
18  
19 719 Between Cancer Patients' Predictions of Prognosis and Their Treatment Preferences.  
20  
21 720 *JAMA*. 1998;279(21):1709–11.  
22  
23 721 102. Strachan PH, Carroll SL, Laats S De, Arthur HM. Patients' Perspectives on End-of-Life  
24  
25 722 Issues and Implantable Cardioverter Defibrillators. *J Palliat Care*. 2011;27(1):6–11.  
26  
27 723 103. Morris RL, Sanders C, Kennedy AP, Rogers A, Morris RL, Sanders C, et al. Shifting  
28  
29 724 priorities in multimorbidity: a longitudinal qualitative study of patient's prioritization of  
30  
31 725 multiple conditions. *Chronic Illn*. 2011;7:147.  
32  
33 726 104. Zulman DM, Jenchura EC, Cohen DM, Lewis ET, Ph D, Houston TK, et al. How Can  
34  
35 727 eHealth Technology Address Challenges Related to Multimorbidity? Perspectives from  
36  
37 728 Patients with Multiple Chronic Conditions. *J Gen Intern Med*. 2015;30(8):1063–70.  
38  
39 729 105. Junius-Walker U, Stolberg D, Steinke P, Theile G, Hummers-Pradier E, Dierks M-L.  
40  
41 730 Health and treatment priorities of older patients and their general practitioners: a  
42  
43 731 cross-sectional study. *Qual Prim Care*. 2011;19:67–76.  
44  
45 732 106. Kerr EA, Heisler M, Krein SL, Kabeto M, Langa KM, Weir D, et al. Beyond Comorbidity  
46  
47 733 Counts: How Do Comorbidity Type and Severity Influence Diabetes Patients' Treatment  
48  
49 734 Priorities. *J Gen Intern Med*. 2007;22(12):1635–40.  
50  
51 735 107. Lindsay S. Prioritizing illness: Lessons in Self-managing Multiple Chronic Diseases. *Can J*  
52  
53 736 *Sociol*. 2009;34(4):983–1002.  
54  
55  
56  
57  
58  
59  
60



- 1  
2  
3 737 108. McDonald VM, Higgins I, Simpson JL, Gibson PG. The importance of clinical  
4  
5 738 management problems in older people with COPD and asthma: do patients and  
6  
7 739 physicians agree? *Prim Care Respir J* [Internet]. 2011 Mar 29;20(4):389–95. Available  
8  
9 740 from: <http://www.nature.com/articles/pcrj201125>  
11  
12 741 109. Richardson LM, Hill JN, Smith BM, Bauer E, Weaver FM, Gordon HS, et al. Patient  
13  
14 742 prioritization of comorbid chronic conditions in the Veteran population: Implications for  
15  
16 743 patient-centered care. *SAGE Open Med*. 2016;4:1–11.  
17  
18 744 110. Zulman DM, Kerr EA, Hofer TP, Heisler M, Zikmund-fisher BJ. Patient-Provider  
19  
20 745 Concordance in the Prioritization of Health Conditions Among Hypertensive Diabetes  
21  
22 746 Patients. *J Gen Intern Med*. 2010;25(5):408–14.  
23  
24 747 111. Schoenberg NE, Leach C, Edwards W. “It’s a toss up between my hearing, my heart, and  
25  
26 748 my hip”: Prioritizing and Accommodating Multiple Morbidities by Vulnerable Older  
27  
28 749 Adults. *J Heal Care Poor Underserved*. 2009;20(1):134–51.  
29  
30 750 112. Fix GM, Cohn ES, Solomon JL, Corte DE, Mueller N, Kressin NR, et al. The role of  
31  
32 751 comorbidities in patients’ hypertension self-management. *Chronic Illn*. 2014;10(2):81–  
33  
34 752 92.  
35  
36 753 113. Junius-Walker U, Ma IV, Hofmann W, Hummers-pradier E, Dierks ML. Impact of a  
37  
38 754 priority-setting consultation on doctor – patient agreement after a geriatric  
39  
40 755 assessment: cluster randomised controlled trial in German general practices. *Qual Prim*  
41  
42 756 *Care*. 2012;20:321–34.  
43  
44 757 114. Proctor EK, Hasche L, Morrow-Howell N, Shumway M, Snell G. Perceptions About  
45  
46 758 Competing Psychosocial Problems and Treatment Priorities Among Older Adults With  
47  
48 759 Depression. *Psychiatr Serv*. 2008;59(6):670–5.  
49  
50 760 115. Beverly E, Wray L, Chiu C, Weinger K. Perceived challenges and priorities in co-  
51  
52 761 morbidity management of older patients with Type 2 diabetes. *Diabet Med*.  
53  
54 762 2011;28(7):781–4.  
55  
56  
57  
58  
59  
60

- 1  
2  
3 763 116. Bower P, Harkness E, Macdonald W, Coventry P, Bundy C, Moss-Morris R. Illness  
4  
5 764 representations in patients with multimorbid long-term conditions : Qualitative study.  
6  
7 765 Psychol Health. 2012;27(10):1211–26.  
8  
9  
10 766 117. Cheraghi-Sohi S, Morden A, Bower P, Kennedy A, Rogers A, Richardson J, et al. Exploring  
11  
12 767 patient priorities among long-term conditions in multimorbidity: A qualitative  
13  
14 768 secondary analysis. SAGE Open Med. 2013 Jan 25;1:205031211350395.  
15  
16 769 118. Hansen H, Pohontsch N, van den Bussche H, Scherer M, Schäfer I. Reasons for  
17  
18 770 disagreement regarding illnesses between older patients with multimorbidity and their  
19  
20 771 GPs – a qualitative study. BMC Fam Pract. 2015 Dec 2;16(1):68.  
21  
22  
23 772 119. Haverhals LM, Lee CA, Siek KA, Darr CA, Linnebur SA, Ruscini JM, et al. Older Adults with  
24  
25 773 Multi-Morbidity: Medication Management Processes and Design Implications for  
26  
27 774 Personal Health Applications. J Med Internet Res. 2011;13(2):1–12.  
28  
29  
30 775 120. Manias E, Claydon-Platt K, McColl GJ, Bucknall TK, Brand CA. Managing Complex  
31  
32 776 Medication Regimens: Perspectives of Consumers with Osteoarthritis and Healthcare  
33  
34 777 Professionals. Pain Manag. 2007;41:764–71.  
35  
36  
37 778 121. Moen J, Bohm A, Tillenius T, Antonov K, Nilsson JLG, Ring L. Patient Education and  
38  
39 779 Counseling ““ I don ’ t know how many of these [ medicines ] are necessary ..” — A  
40  
41 780 focus group study among elderly users of multiple medicines. 2009;74:135–41.  
42  
43 781 122. Pagès-Puigdemont N, Mangues MA, Masip M, Gabriele G, Fernández-Maldonado L,  
44  
45 782 Blancafort S, et al. Patients’ Perspective of Medication Adherence in Chronic  
46  
47 783 Conditions: A Qualitative Study. Adv Ther. 2016;33:1740–54.  
48  
49  
50 784 123. Brown VA, Bartholomew LK, Naik AD. Management of chronic hypertension in older  
51  
52 785 men: An exploration of patient goal-setting. Patient Educ Couns. 2007;69:93–9.  
53  
54 786 124. de Vries ST, de Vries FM, Dekker T, Haaijer-ruskamp FM. The Role of Patients’ Age on  
55  
56 787 Their Preferences for Choosing Additional Blood Pressure-Lowering Drugs: A Discrete  
57  
58 788 Choice Experiment in Patients with Diabetes. PLoS One. 2015;10(10):1–15.  
59  
60

- 1  
2  
3 789 125. Dinapoli EA, Cinna C, Whiteman KL, Fox L, Appelt CJ. Mental health treatment  
4  
5 790 preferences and challenges of living with multimorbidity from the veteran perspective.  
6  
7 791 Int J Geriatr Psychiatry. 2016;31:1097–104.  
8  
9  
10 792 126. Caughey GE, Tait K, Vitry AI, Shakib S. Influence of medication risks and benefits on  
11  
12 793 treatment preferences in older patients with multimorbidity. *Partient Prefer*  
13  
14 794 *Adherence*. 2017;11:131–40.  
15  
16 795 127. Chanouzas D, Ng KP, Fallouh B, Baharani J. What influences patient choice of treatment  
17  
18 796 modality at the pre-dialysis stage ? *Nephrol Dial Transpl*. 2012;27:1542–7.  
19  
20  
21 797 128. Morton RL, Snelling P, Webster AC, Rose J, Masterson R, Johnson DW, et al. Factors  
22  
23 798 influencing patient choice of dialysis versus conservative care to treat end-stage kidney  
24  
25 799 disease. *CMJA*. 2012;184(5):277–83.  
26  
27  
28 800 129. Seah AST, Tan iona T, Srinivas S, Wu HY, Griva K. Opting out of dialysis – Exploring  
29  
30 801 patients’ decisions to forego dialysis in favour of conservative non-dialytic  
31  
32 802 management for end-stage renal disease. *Heal Expect*. 2013;18:1018–29.  
33  
34  
35 803 130. Visser A, Dijkstra G, Kuiper D, de Jong PE, Franssen C, Gansevoort RT, et al. Accepting or  
36  
37 804 declining dialysis Accepting or declining dialysis: considerations taken into account by  
38  
39 805 elderly patients with end-stage renal disease. *J Nephrol*. 2009;22(6):794–9.  
40  
41  
42 806 131. Green AR, Boyd CM, Rickard J, Gomon R, Leff B. Attitudes of older adults with serious  
43  
44 807 competing health risks toward their implantable cardioverter-defibrillators: a pilot  
45  
46 808 study. *BMC Geriatr*. 2015;15:173.  
47  
48  
49 809 132. Green AR, Jenkins AMY, Masoudi FA, Magid DJ, Kutner JS, Leff B, et al. Decision-Making  
50  
51 810 Experiences of Patients with Implantable Cardioverter Defibrillators. *PACE*.  
52  
53 811 2016;39:1061–9.  
54  
55 812 133. Parks ML, Hebert-beirne J, Rojas M, Tuzzio L, Nelson CL, Boutin-foster C. A Qualitative  
56  
57 813 Study of Factors Underlying Decision Making for Joint Replacement among African  
58  
59 814 Americans and Latinos with Osteoarthritis. *J Long Term Eff Med Implant*.

- 1  
2  
3 815 2014;24(0):205–12.  
4  
5 816 134. Suggs PD, Holliday TL, Thompson SN. Factors Affecting Choice of Treatment for Early-  
6  
7 817 Stage Breast Cancer in West Virginia: A 10-Year Experience from a Rural Tertiary Care  
8  
9 818 Center. *Am Surg*. 2013;83:13–6.  
10  
11 819 135. Gironés R, Torregrosa D, Inma JG, Jose M, Tenias M, Rosell R. Lung cancer  
12  
13 820 chemotherapy decisions in older patients: the role of patient preference and  
14  
15 821 interactions with physicians. *Clin Transl Oncol*. 2012;14:183–9.  
16  
17 822 136. Hamelinck VC, Bastiaannet E, Pieterse AH, Glas NA De, Portielje JEA, Merkus JWS, et al.  
18  
19 823 Original Study A Prospective Comparison of Younger and Older Patients' Preferences  
20  
21 824 for Adjuvant Chemotherapy and Hormonal Therapy in Early Breast Cancer. *Clin Breast*  
22  
23 825 *Cancer*. 2016;(October):379–88.  
24  
25 826 137. Puts MTE, Sattar S, Mcwatters K, Lee K, Kulik M, Macdonald M, et al. Chemotherapy  
26  
27 827 treatment decision-making experiences of older adults with cancer , their family  
28  
29 828 members , oncologists and family physicians: a mixed methods study. *Support Care*  
30  
31 829 *Cancer*. 2017;25:879–86.  
32  
33 830 138. Fox MT, Sidani S, Brooks D, Mccague H. Perceived acceptability and preferences for  
34  
35 831 low-intensity early activity interventions of older hospitalized medical patients exposed  
36  
37 832 to bed rest: a cross sectional study. *BMC Geriatr*. 2018;18:53.  
38  
39 833 139. Lyle S, Williamson E, Darton F, Griffiths F, Lamb E, Lyle S, et al. A qualitative study of  
40  
41 834 older people' s experience of living with neurogenic claudication to inform the  
42  
43 835 development of a physiotherapy intervention. *Disabil Rehabil*. 2017;39(10):1009–17.  
44  
45 836 140. O'Dell KK, Jacelon C, Morse AN. 'I 'd Rather Just Go On as I Am' – Pelvic Floor Care  
46  
47 837 Preferences Residential Care. *Urol Nurs*. 2008;28(1):36–47.  
48  
49 838 141. Adams R, May H, Swift L, Bhattacharya D. Do older patients find multi-compartment  
50  
51 839 medication devices easy to use and which are the easiest? *Age Ageing*. 2013;42:715–  
52  
53 840 20.  
54  
55  
56  
57  
58  
59  
60

- 1  
2  
3 841 142. Bravo RL. Medical Decision-Making among Foreign-Born Latino Elders with Multiple  
4  
5 842 Chronic Conditions. 2016.  
6  
7 843 143. Chi WC, Wolff J, Greer R, Dy S. Multimorbidity and Decision-Making Preferences Among  
8  
9 844 Older Adults. *Ann Fam Med*. 2017;15:546–51.  
10  
11 845 144. Collins M, Crowley R, Karlawish JHT, Casarett DJ. Are Depressed Patients More Likely to  
12  
13 846 Share. *J Palliat Med*. 2004;7(4):527–32.  
14  
15  
16 847 145. Ekdahl AW, Andersson L, Friedrichsen M. "They do what they think is the best for me."  
17  
18 848 Frail elderly patients' preferences for participation in their care during hospitalization.  
19  
20 849 *Patient Educ Couns*. 2010;80(2):233–40.  
21  
22  
23 850 146. Ekdahl AW, Andersson L, Wiréhn A, Friedrichsen M. Are elderly people with co-  
24  
25 851 morbidities involved adequately in medical decision making when hospitalised? A cross-  
26  
27 852 sectional survey. *BMC Geriatr*. 2011;11(1):46.  
28  
29  
30 853 147. Moise N, Ye S, Alcántara C, Davidson KW, Kronish I. Depressive symptoms and decision-  
31  
32 854 making preferences in patients with comorbid illnesses. *J Psychosom Res*. 2017;92:63–  
33  
34 855 6.  
35  
36 856 148. Naik AD, Street RL, Castillo D, Abraham NS. Patient Education and Counseling Health  
37  
38 857 literacy and decision making styles for complex antithrombotic therapy among older  
39  
40 858 multimorbid adults. *Patient Educ Couns*. 2011;85(3):499–504.  
41  
42  
43 859 149. Perret-Guillaume C, Genet C, Herrmann R, Benetos A. Attitudes and Approaches to  
44  
45 860 Decision Making About Antihypertensive Treatment in Elderly Patients. *J Am Med Dir*  
46  
47 861 *Assoc*. 2011;12:121–8.  
48  
49  
50 862 150. Weir K, Nickel B, Naganathan V, Bonner C, McCaffery K, Carter SM, et al. Decision-  
51  
52 863 Making Preferences and Deprescribing: Perspectives of Older Adults and Companions  
53  
54 864 About Their Medicines. *Journals Gerontol Ser B*. 2018 Sep 20;73(7):e98–107.  
55  
56  
57 865 151. Belcher VN, Fried TR, Agostini J V, Tinetti ME. Views of Older Adults on Patient  
58  
59 866 Participation in Medication-related Decision Making. *J Gen Intern Med*. 2006;21:298–  
60

- 1  
2  
3 867 303.  
4  
5 868 152. Morrow D, Weiner M, Deer MM, Young JM, Dunn S, Mcguire P, et al. Patient-Centered  
6  
7 869 Instructions for Medications Prescribed for the Treatment o f Heart Failure. Am J  
8  
9 870 Geriatr Pharmacother. 2004;2(1):2–5.  
10  
11 871 153. Bayliss EA, Edwards AE, Steiner JF, Main DS. Processes of care desired by elderly  
12  
13 872 patients with multimorbidities. Fam Pract. 2008 Aug;25(4):287–93.  
14  
15 873 154. Browne S, Macdonald S, May CR, Macleod U, Mair FS. Patient, Carer and Professional  
16  
17 874 Perspectives on Barriers and Facilitators to Quality Care in Advanced Heart Failure. PLoS  
18  
19 875 One. 2014;9(3):e93288.  
20  
21 876 155. Ehman KM, Deyo-svendsen M, Merten Z, Kramlinger AM, Garrison GM. How  
22  
23 877 Preferences for Continuity and Access Differ Between Multimorbidity and Healthy  
24  
25 878 Patients in a Team Care Setting. J Prim Care Community Health. 2017;8(4):319–23.  
26  
27 879 156. Gum AM, Ph D, Iser L, Petkus A. Behavioral Health Service Utilization and Preferences of  
28  
29 880 Older Adults Receiving Home-Based Aging Services. Am J Geriatr Psychiatry.  
30  
31 881 2010;18(6):491–501.  
32  
33 882 157. Naganathan G, Kuluski K, Gill A, Jaakkimainen RL, Upshur R, Wodchis WP. Perceived  
34  
35 883 value of support for older adults coping with multi-morbidity : patient , informal care-  
36  
37 884 giver and family physician perspectives. Ageing Soc. 2016;36:1891–914.  
38  
39 885 158. Pandhi N, Schumacher J, Flynn KE, Smith M. Patients’ perceptions of safety if  
40  
41 886 interpersonal continuity of care were to be disrupted. Heal Expect. 2008;11:400–8.  
42  
43 887 159. Schoenborn NL, Boyd CM, Mcnabney M, Cayea D. Current Practices and Opportunities  
44  
45 888 in a Resident Clinic Regarding the Care of Older Adults with Multimorbidity. J Am  
46  
47 889 Geriatr Soc. 2015;63:1645–51.  
48  
49 890 160. Utens CM, MA GL, van Schayck OC, Rutten-van Mólken MP, van Litsenburg W, Janssen  
50  
51 891 A, et al. Patient preference and satisfaction in hospital-at-home and usual hospital care  
52  
53 892 for COPD exacerbations: Results of a randomised controlled trial. Int J Nurs Stud.  
54  
55  
56  
57  
58  
59  
60

- 1  
2  
3 893 2013;50:1537–49.  
4  
5 894 161. Wieldraaijer T, Duineveld LAM, Donkervoort SC, Busschers WB, M VWHCP, Wind J.  
6  
7 895 Colorectal cancer patients' preferences for type of caregiver during survivorship care.  
8  
9 896 Scand J Prim Health Care. 2018;36(1):14–9.  
10  
11  
12 897 162. BATTERY AK, Carr-white G, Martin FC, Glaser K, Lowton K. Cardiac rehabilitation for heart  
13  
14 898 failure: Do older people want to attend and are they referred? Eur Geriatr Med.  
15  
16 899 2014;5(4):246–51.  
17  
18 900 163. Lim CY, Des M, Berry ABL, Hirsch T, Hartzler AL, Wagner EH, et al. Understanding What  
19  
20 901 Is Most Important to Individuals with Multiple Chronic Conditions: A Qualitative Study  
21  
22 902 of Patients' Perspectives. JGIM. 2017;32(12):1278–84.  
23  
24  
25 903 164. Naik AD, Martin LA, Moye J, Karel MJ. Health Values and Treatment Goals of Older,  
26  
27 904 Multimorbid Adults Facing Life-Threatening Illness. J Am Geriatr Soc. 2016;64:625–31.  
28  
29  
30 905 165. Robben SHM, Heinen M, Melis RJF. Care-related goals of community-dwelling frail older  
31  
32 906 adults. JAGS. 2011;59(8):1552–4.  
33  
34 907 166. Schellinger SE, Anderson EW, Frazer MS, Cain CL. Patient Self-Defined Goals : Essentials  
35  
36 908 of Person-Centered Care for Serious Illness. Am J Hosp Palliat Med. 2018;35(1):159–65.  
37  
38  
39 909 167. Case SM, Fried TR, Leary JO. How to ask: Older adults' preferred tools in health  
40  
41 910 outcome prioritization. Patient Educ Couns. 2013;91:29–36.  
42  
43 911 168. Janssen IM, Gerhardus A, Baldamus CA, Schaller M, Barth C. Preferences of patients  
44  
45 912 undergoing hemodialysis – results from a questionnaire-based study with. Patient  
46  
47 913 Prefer Adherence. 2015;9:847–55.  
48  
49  
50 914 169. Karel MJ, Mulligan EA, Ms AW, Martin LA, Moye J, Naik AD. Valued life abilities among  
51  
52 915 veteran cancer survivors. Heal Expect. 2015;19:679–90.  
53  
54 916 170. Tinetti ME, Mcavay ÆGJ, Fried ÆTR, Allore ÆHG, Joanna Æ, Salmon C, et al. Health  
55  
56 917 Outcome Priorities Among Competing Cardiovascular, Fall Injury, and Medication-  
57  
58 918 Related Symptom Outcomes. J Am Geriatr Soc. 2008;56:1409–16.  
59  
60

- 1  
2  
3 919 171. van Summeren JJGT, Haaijer-ruskamp FM, Schuling J. Eliciting Preferences of  
4  
5 920 Multimorbid Elderly Adults in Family Practice Using an Outcome Prioritization Tool. *J*  
6  
7 921 *Am Geriatr Soc.* 2016;64:143–8.
- 8  
9 922 172. Kuluski K, Gill A, Naganathan G, Upshur R, Jaakkimainen RL, Wodchis WP. A qualitative  
10  
11 923 descriptive study on the alignment of care goals between older persons with multi-  
12  
13 924 morbidities, their family physicians and informal caregivers. *BMC Fam Pract.*  
14  
15 925 2013;14(1):133.
- 16  
17 926 173. Toto PE, Skidmore ER, Terhorst L, Rosen J, Weiner DK. Goal Attainment Scaling (GAS) in  
18  
19 927 geriatric primary care: A feasibility study. *Arch Gerontol Geriatr.* 2015;60(1):16–21.
- 20  
21 928 174. Gross CP, Fried TR, Tinetti ME, Ross JS, Genao I, Hossain S, et al. Decision-making and  
22  
23 929 cancer screening: A qualitative study of older adults with multiple chronic conditions. *J*  
24  
25 930 *Geriatr Oncol.* 2014;6(2):93–100.
- 26  
27 931 175. Bratzke LC, Muehrer RJ, Kehl KA, Lee KS, Ward EC, Kwekkeboom KL. Self-management  
28  
29 932 priority setting and decision-making in adults with multimorbidity: a narrative review of  
30  
31 933 literature. *Int J Nurs Stud.* 2015 Mar;52(3):744–55.
- 32  
33 934 176. Fried TR, Tinetti M, Iannone L, O’Leary JR, Towle V, Van Ness PH. Health Outcome  
34  
35 935 Prioritization as a Tool for Decision Making Among Older Persons With Multiple Chronic  
36  
37 936 Conditions. *Arch Intern Med.* 2011;171(20):1854–6.
- 38  
39 937 177. Fried TR, Tinetti M, Agostini J, Iannone L, Towle V. Health outcome prioritization to  
40  
41 938 elicit preferences of older persons with multiple health conditions. *Patient Educ Couns.*  
42  
43 939 2011;83(2):278–82.
- 44  
45 940 178. World Health Organization. Why palliative care is an essential function of primary  
46  
47 941 health care [Internet]. 2018. Available from: [https://www.who.int/docs/default-](https://www.who.int/docs/default-source/primary-health-care-conference/palliative.pdf?sfvrsn=ecab9b11_2)  
48  
49 942 [source/primary-health-care-conference/palliative.pdf?sfvrsn=ecab9b11\\_2](https://www.who.int/docs/default-source/primary-health-care-conference/palliative.pdf?sfvrsn=ecab9b11_2)
- 50  
51 943 179. Puts MTE, Tapscott B, Fitch M, Howell D, Monette J, Wan-chow-wah D, et al. A  
52  
53 944 systematic review of factors influencing older adults’ decision to accept or decline  
54  
55  
56  
57  
58  
59  
60



- 1  
2  
3 945 cancer treatment. *Cancer Treat Rev.* 2015;41(2):197–215.  
4  
5 946 180. Puts MT, Tapscott B, Fitch M, Howell D, Monette J, Wan-chow-wah D, et al. A  
6  
7 947 Systematic Review of Factors Influencing Older Adults' Hypothetical Treatment  
8  
9 948 Decisions. *Oncol Hematol Rev.* 2015;11(1):19–33.  
10  
11 949 181. de Decker L, Annweiler C, Launay C, Fantino B, Beauchet O. Do not resuscitate orders  
12  
13 950 and aging: impact of multimorbidity on the decision-making process. *J Nutr Health*  
14  
15 951 *Aging.* 2014;18(3):330–5.  
16  
17 952 182. Singh JA, Sloan JA, Atherton PJ, Smith T, Hack TF, Huschka MM, et al. Preferred Roles in  
18  
19 953 Treatment Decision Making Among Patients With Cancer: A Pooled Analysis of Studies  
20  
21 954 Using the Control Preferences Scale. *Am J Manag Care.* 2011;16(9):688–96.  
22  
23 955 183. Vermunt NPCA, Harmsen M, Westert GP, Rikkert MGMO, Faber MJ. Collaborative goal  
24  
25 956 setting with elderly patients with chronic disease or multimorbidity: a systematic  
26  
27 957 review. *BMC Geriatr.* 2017;17:167.  
28  
29 958 184. Benzie KM, Premji S, Hayden KA, Serrett K. State-of-the-Evidence Reviews: Advantages  
30  
31 959 and Challenges of Including Grey Literature. *Worldviews Evidence-Based Nurs*  
32  
33 960 [Internet]. 2006 Jun;3(2):55–61. Available from: <http://doi.wiley.com/10.1111/j.1741->  
34  
35 961 [6787.2006.00051.x](http://doi.wiley.com/10.1111/j.1741-6787.2006.00051.x)  
36  
37  
38  
39  
40  
41  
42

### 963 **ACKNOWLEDGMENTS**

964 The authors would like to thank Katharina Wollmann for her support in the literature screening  
965 process, as well as Jessica Comilang for her assistance in providing full texts of the screened  
966 studies and Pauline Philipp for her support in contacting authors of conference proceedings  
967 manuscripts.

### 968 **CONTRIBUTORS**

1  
2  
3 969 AIG wrote the initial draft of the manuscript. CM is the guarantor of the review. CS and JM  
4  
5 970 provided methodological guidance and revisions to the manuscript. EM developed and carried  
6  
7 971 out the search strategy. CS and JN assisted in the identification of databases and the search  
8  
9 972 strategy. AIG and JN screened the studies, extracted the data and performed content analysis.  
10  
11 973 AIG summarised descriptives, and TN, MSB and JN assisted with figures. JB, MvA, TN, MSB,  
12  
13 974 OW, KR, TH, FG and SS are co-supervisors of this project, provided advice at all stages of the  
14  
15 975 development of the protocol, and contributed to the revision of the manuscript. All authors  
16  
17 976 read and approved the final manuscript.  
18  
19

20  
21 977 **FUNDING**  
22

23  
24 978 This work was supported by the German Federal Ministry of Education and Research, grant  
25  
26 979 number 01GL1729.  
27  
28

29  
30 980 **DISCLAIMER**  
31

32  
33 981 The funder had no role in developing the protocol or obtaining the results for this review.  
34  
35

36  
37 982 **COMPETING INTERESTS**  
38

39 983 None declared  
40  
41

42 984 **DATA SHARING**  
43

44  
45 985 No additional data available.  
46  
47

48  
49 986 **PATIENT AND PUBLIC INVOLVEMENT**  
50

51  
52 987 Not required.  
53  
54

55 988 **WORD COUNT**  
56

57  
58 989 3502  
59  
60

1  
2  
3  
4  
5  
6  
7  
8  
9  
10  
11  
12  
13  
14  
15  
16  
17  
18  
19  
20  
21  
22  
23  
24  
25  
26  
27  
28  
29  
30  
31  
32  
33  
34  
35  
36  
37  
38  
39  
40  
41  
42  
43  
44  
45  
46  
47  
48  
49  
50  
51  
52  
53  
54  
55  
56  
57  
58  
59  
60

990

For peer review only

1  
2  
3 991 **FIGURE LEGENDS**  
4

5 992 **Figure 1. Evidence map PRISMA flowchart**  
6

7 993 **Figure 2. Types of preference by setting and study design\***  
8

9  
10 994 Circle size represents the number of studies; pattern coding represents the study design. \*The  
11  
12 995 bubble plot displays more than the total number of included studies (n=174 vs. n=152) because  
13  
14 996 22 studies were assigned to two different types of preference.  
15  
16  
17  
18  
19  
20  
21  
22  
23  
24  
25  
26  
27  
28  
29  
30  
31  
32  
33  
34  
35  
36  
37  
38  
39  
40  
41  
42  
43  
44  
45  
46  
47  
48  
49  
50  
51  
52  
53  
54  
55  
56  
57  
58  
59  
60

1  
2  
3  
4  
5  
6  
7  
8  
9  
10  
11  
12  
13  
14  
15  
16  
17  
18  
19  
20  
21  
22  
23  
24  
25  
26  
27  
28  
29  
30  
31  
32  
33  
34  
35  
36  
37  
38  
39  
40  
41  
42  
43  
44  
45  
46  
47  
48  
49  
50  
51  
52  
53  
54  
55  
56  
57  
58  
59  
60

For peer review only

Figure 1. Evidence map PRISMA flowchart (21)

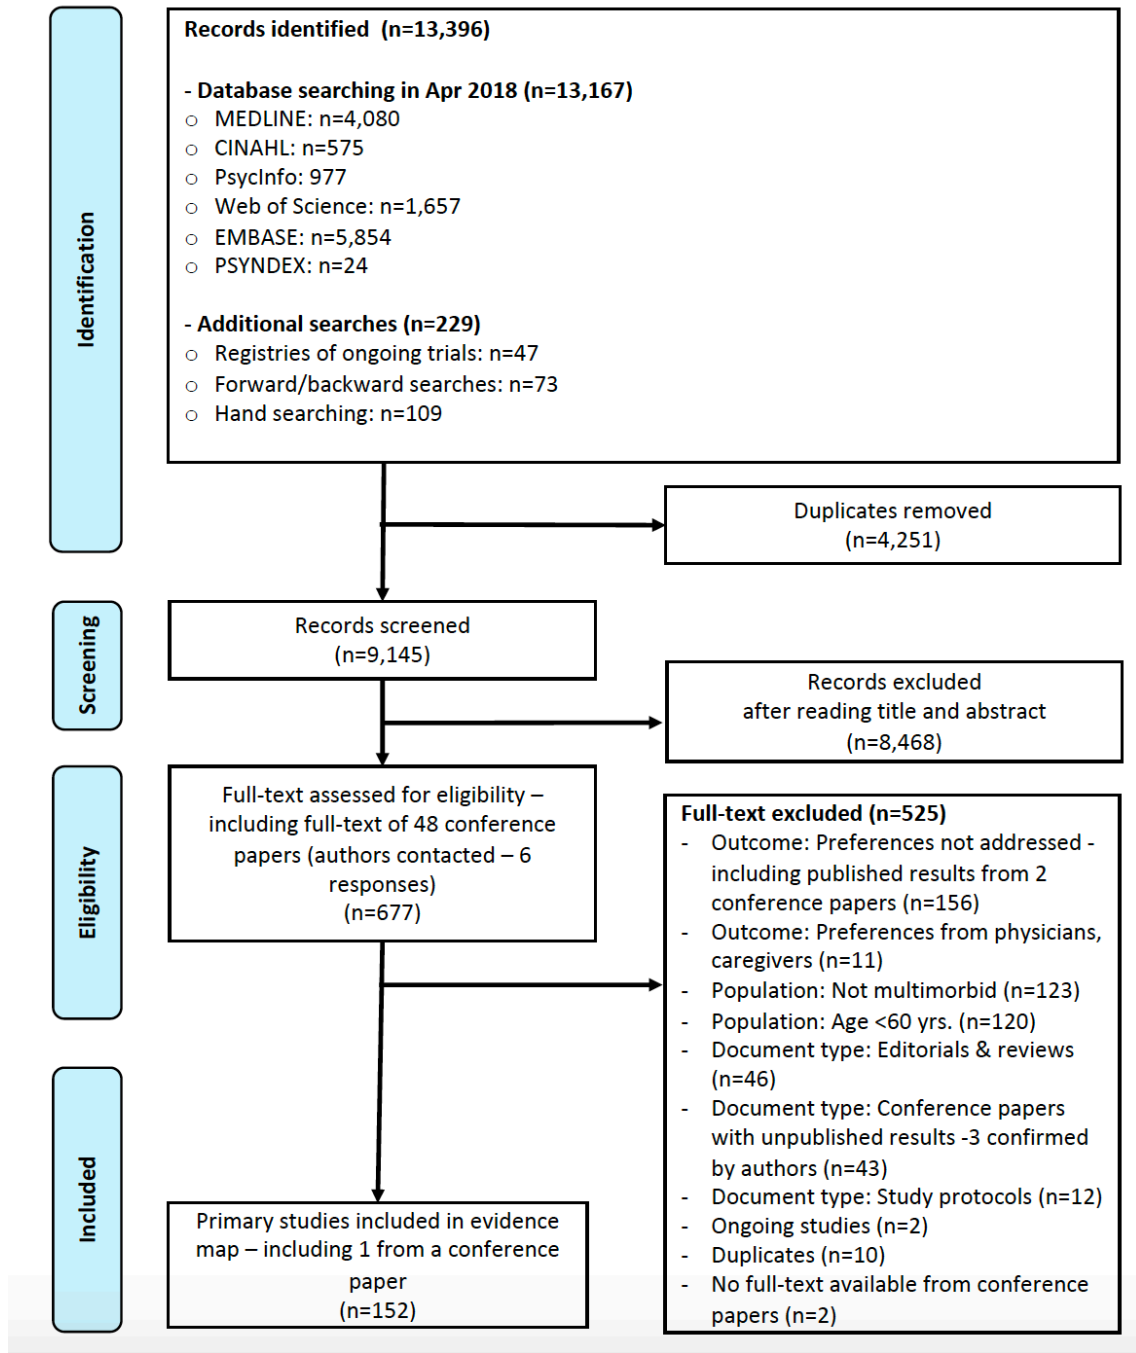

Figure 2. Types of preferences investigated in the included studies by setting and study design\*

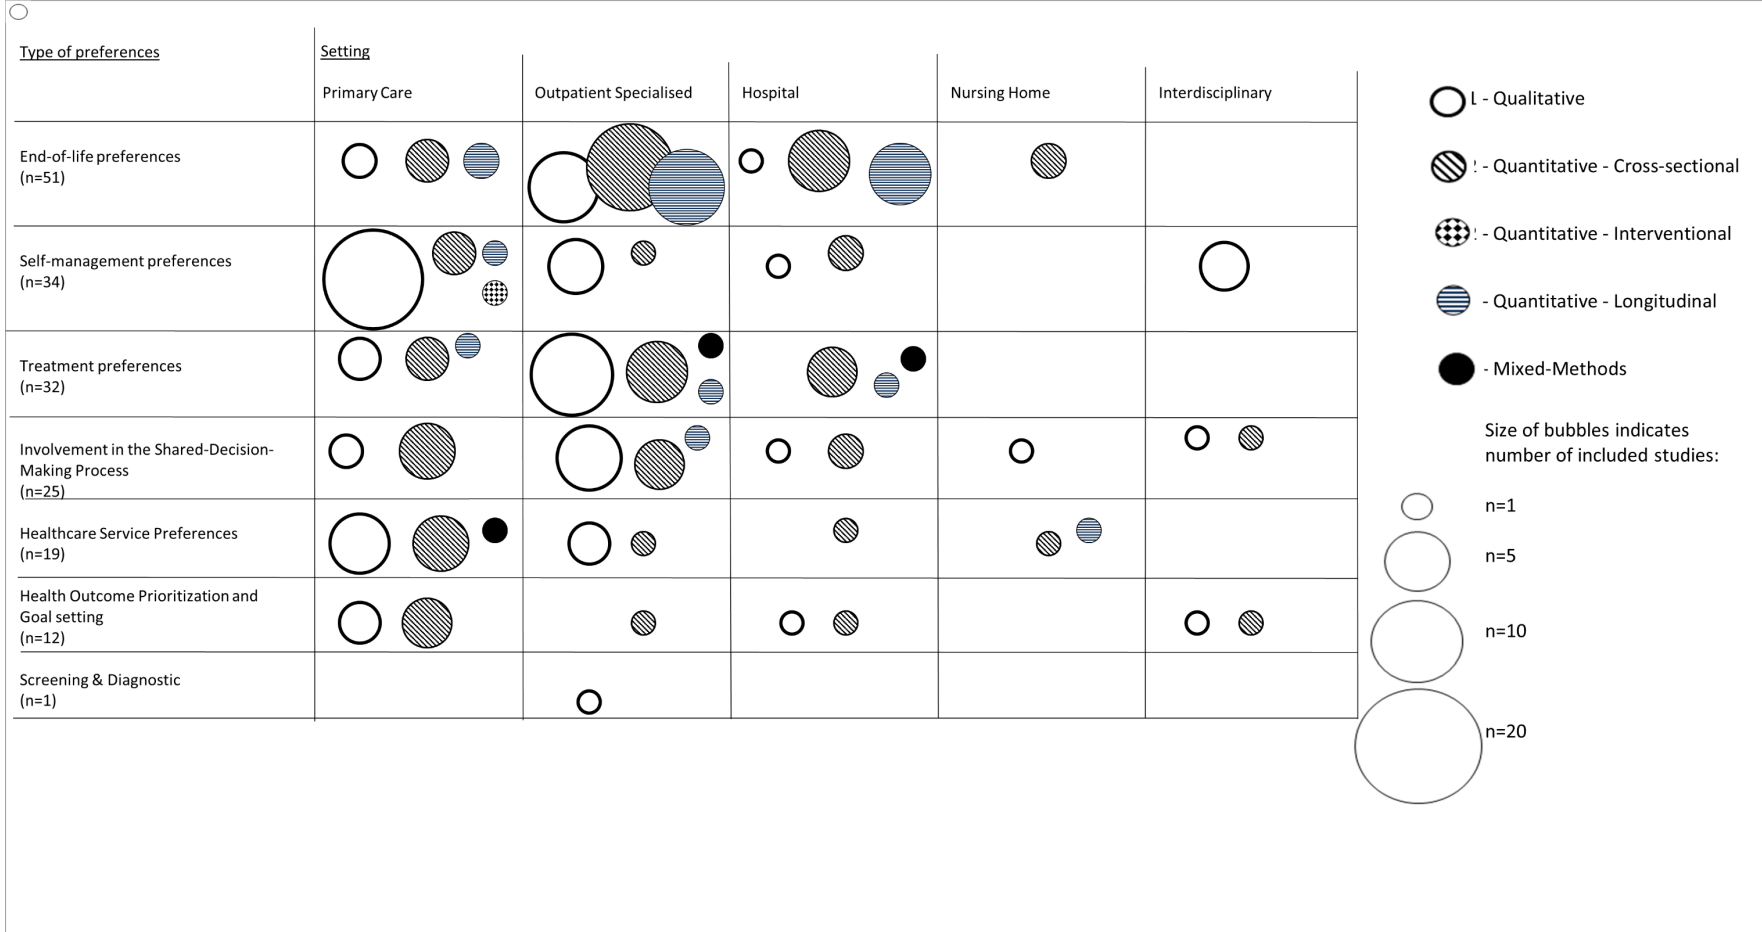

Size of the circles represent number of studies; pattern coding represents study design. \*The bubble plot depicts more than the total number of included studies (n=174 vs. n=152) because 22 studies were assigned to two different types of preferences.

Figure S1. Number of studies published per year.

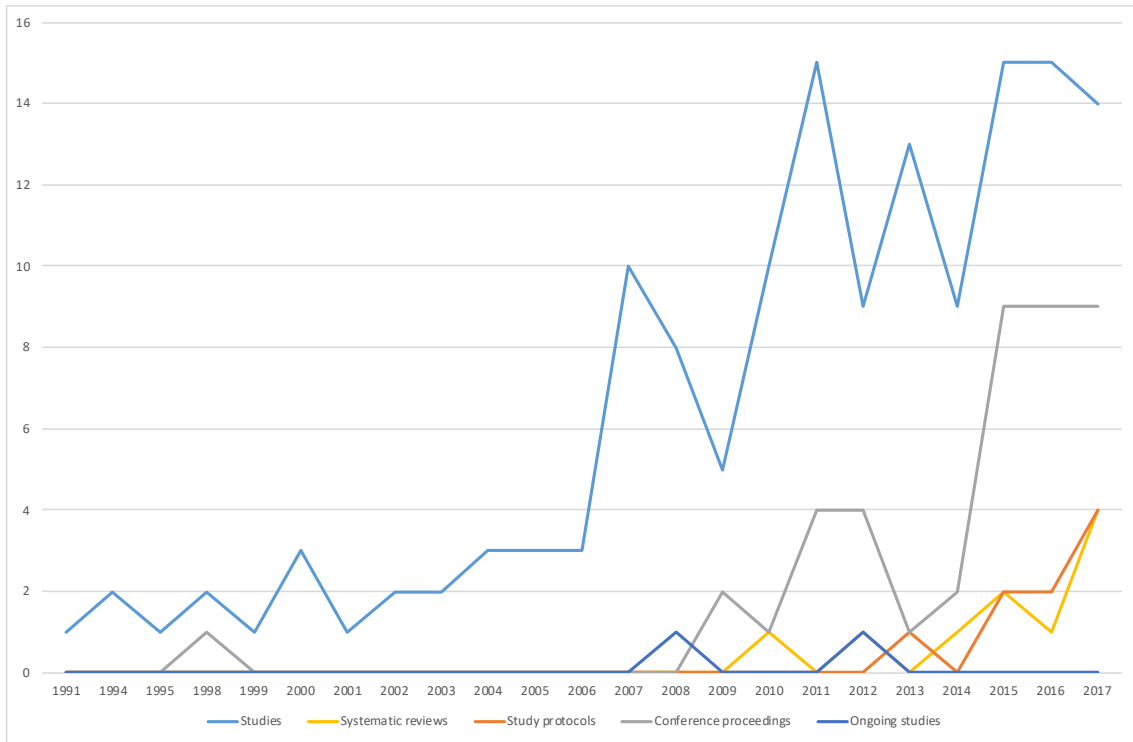



**Table S1. Preferred Reporting Items for Systematic reviews and Meta-Analyses extension for Scoping Reviews (PRISMA-ScR) Checklist**

| SECTION                           | ITEM | PRISMA-ScR CHECKLIST ITEM                                                                                                                                                                                                                                                 | REPORTED ON PAGE #      |
|-----------------------------------|------|---------------------------------------------------------------------------------------------------------------------------------------------------------------------------------------------------------------------------------------------------------------------------|-------------------------|
| <b>TITLE</b>                      |      |                                                                                                                                                                                                                                                                           |                         |
| Title                             | 1    | Identify the report as a scoping review.                                                                                                                                                                                                                                  | Page 1                  |
| <b>ABSTRACT</b>                   |      |                                                                                                                                                                                                                                                                           |                         |
| Structured summary                | 2    | Provide a structured summary that includes (as applicable): background, objectives, eligibility criteria, sources of evidence, charting methods, results, and conclusions that relate to the review questions and objectives.                                             | Pages 5-6               |
| <b>INTRODUCTION</b>               |      |                                                                                                                                                                                                                                                                           |                         |
| Rationale                         | 3    | Describe the rationale for the review in the context of what is already known. Explain why the review questions/objectives lend themselves to a scoping review approach.                                                                                                  | Pages 8-9               |
| Objectives                        | 4    | Provide an explicit statement of the questions and objectives being addressed with reference to their key elements (e.g., population or participants, concepts, and context) or other relevant key elements used to conceptualise the review questions and/or objectives. | Page 9                  |
| <b>METHODS</b>                    |      |                                                                                                                                                                                                                                                                           |                         |
| Protocol and registration         | 5    | Indicate whether a review protocol exists; state if and where it can be accessed (e.g., a web address); and if available, provide registration information, including the registration number.                                                                            | Page 6                  |
| Eligibility criteria              | 6    | Specify characteristics of the sources of evidence used as eligibility criteria (e.g., years considered, language, and publication status), and provide a rationale.                                                                                                      | Pages 10-11             |
| Information sources*              | 7    | Describe all information sources in the search (e.g., databases with dates of coverage and contact with authors to identify additional sources), as well as the date the most recent search was executed.                                                                 | Page 9-10               |
| Search                            | 8    | Present the full electronic search strategy for at least 1 database, including any limits used, such that it could be repeated.                                                                                                                                           | Page 10; Suppl table 2. |
| Selection of sources of evidence† | 9    | State the process for selecting sources of evidence (i.e., screening and eligibility) included in the scoping review.                                                                                                                                                     | Page 10-11              |
| Data charting process‡            | 10   | Describe the methods of charting data from the included sources of evidence (e.g., calibrated forms, or forms that were tested by the team before being used, and whether data charting was done independently or in                                                      | Page 10                 |

| SECTION                                              | ITEM | PRISMA-ScR CHECKLIST ITEM                                                                                                                                                                                   | REPORTED ON PAGE #                |
|------------------------------------------------------|------|-------------------------------------------------------------------------------------------------------------------------------------------------------------------------------------------------------------|-----------------------------------|
|                                                      |      | duplicate) and any processes for obtaining and confirming data from investigators.                                                                                                                          |                                   |
| Data items                                           | 11   | List and define all variables for which data were sought and any assumptions and simplifications made.                                                                                                      | Page 11                           |
| Critical appraisal of individual sources of evidence | 12   | If applicable, provide a rationale for conducting a critical appraisal of included sources of evidence; describe the methods used and how this information was used in any data synthesis (if appropriate). | Not applicable                    |
| Synthesis of results                                 | 13   | Describe the methods of dealing with and summarising the data that were charted.                                                                                                                            | Page 11-12                        |
| <b>RESULTS</b>                                       |      |                                                                                                                                                                                                             |                                   |
| Selection of sources of evidence                     | 14   | Give numbers of sources of evidence screened, assessed for eligibility, and included in the review, with reasons for exclusions at each stage, ideally using a flow diagram.                                | Page 12; Suppl table 3, Figure 1. |
| Characteristics of sources of evidence               | 15   | For each source of evidence, present characteristics for which data were charted and provide the citations.                                                                                                 | Page 12; Table 1.                 |
| Critical appraisal within sources of evidence        | 16   | If done, present data on critical appraisal of included sources of evidence (see item 12).                                                                                                                  | Not applicable                    |
| Results of individual sources of evidence            | 17   | For each included source of evidence, present the relevant data that were charted that relate to the review questions and objectives.                                                                       | Pages 13-16; Tables 2 and 3.      |
| Synthesis of results                                 | 18   | Summarise and/or present the charting results as they relate to the review questions and objectives.                                                                                                        | Pages 13-16; Figure 2             |
| <b>DISCUSSION</b>                                    |      |                                                                                                                                                                                                             |                                   |
| Summary of evidence                                  | 19   | Summarise the main results (including an overview of concepts, themes, and types of evidence available), link to the review questions and objectives, and consider the relevance to key groups.             | Pages 16-18                       |
| Limitations                                          | 20   | Discuss the limitations of the scoping review process.                                                                                                                                                      | Page 19                           |
| Conclusions                                          | 21   | Provide a general interpretation of the results with respect to the review questions and objectives, as well as potential implications and/or next steps.                                                   | Page 20                           |
| <b>FUNDING</b>                                       |      |                                                                                                                                                                                                             |                                   |
| Funding                                              | 22   | Describe sources of funding for the included sources of evidence, as well as sources of funding for the scoping review. Describe the role of the funders of the scoping review.                             | Page 41                           |

JBI = Joanna Briggs Institute; PRISMA-ScR = Preferred Reporting Items for Systematic reviews and Meta-Analyses extension for Scoping Reviews.

1  
2  
3 \* Where *sources of evidence* (see second footnote) come from, such as bibliographic  
4 databases, social media platforms, and Web sites.

5 † A more inclusive/heterogeneous term used to account for the different types of evidence or  
6 data sources (e.g., quantitative and/or qualitative research, expert opinion, and policy  
7 documents) that may be eligible for inclusion in a scoping review as opposed to only studies.  
8 This is not to be confused with *information sources* (see first footnote).

9 ‡ The frameworks by Arksey and O'Malley (6) and Levac and colleagues (7) and the JBI  
10 guidance (4, 5) refer to the process of data extraction in a scoping review as data charting.

11 § The process of systematically examining research evidence to assess its validity, results, and  
12 relevance before using it to inform a decision. This term is used for items 12 and 19 instead of  
13 "risk of bias" (which is more applicable to systematic reviews of interventions) to include and  
14 acknowledge the various sources of evidence that may be used in a scoping review (e.g.,  
15 quantitative and/or qualitative research, expert opinion, and policy document).  
16  
17  
18  
19  
20

21 *From:* Tricco AC, Lillie E, Zarin W, O'Brien KK, Colquhoun H, Levac D, et al. PRISMA Extension  
22 for Scoping Reviews (PRISMA-ScR): Checklist and Explanation. *Ann Intern Med.*169:467–473.  
23 doi: 10.7326/M18-0850  
24  
25  
26  
27  
28  
29  
30  
31  
32  
33  
34  
35  
36  
37  
38  
39  
40  
41  
42  
43  
44  
45  
46  
47  
48  
49  
50  
51  
52  
53  
54  
55  
56  
57  
58  
59  
60

1 **Table S2. Search strategy used for MEDLINE database (search interface: Ovid; Host: Wolters Kluwer)**

2 MEDLINE 1946 to the third week of April, 2018,

3 MEDLINE Daily Update April 26, 2018,

4 MEDLINE In-Process & Other Non-Indexed Citations April 26, 2018,

5 MEDLINE Epub Ahead of Print April 26, 2018

6 Search date (yyyy-mm-dd): 2018-04-27

| #  | Searches                                                                                                                             | Results | Annotations                          |
|----|--------------------------------------------------------------------------------------------------------------------------------------|---------|--------------------------------------|
| 1  | exp aged/                                                                                                                            | 2800655 | #1 to #8:<br>Aspect Aged             |
| 2  | Geriatrics/                                                                                                                          | 28648   |                                      |
| 3  | (old*3 adj2 (adult*2 or people or person* or patient* or age*2 or man or men or wom#n or client* or residen*)).ti,ab,kf.             | 551680  |                                      |
| 4  | (elder* or geriat* or geronto* or frail* or senior? or agedly).ti,ab,kf.                                                             | 314577  |                                      |
| 5  | (high*3 age*2 or late* life* or late* live*).ti,ab,kf.                                                                               | 21918   |                                      |
| 6  | ((liv* or life*) adj2 long*3 adj2 (adult* or people or person* or patient* or man or men or wom?n or client* or residen*)).ti,ab,kf. | 2540    |                                      |
| 7  | advanced in years.ti,ab,kf. or betagt*.ot.                                                                                           | 162     |                                      |
| 8  | or/1-7                                                                                                                               | 3248520 |                                      |
| 9  | comorbidity/                                                                                                                         | 92917   | #9 to #21:<br>Aspect Multi-morbidity |
| 10 | Multiple Chronic Conditions/                                                                                                         | 178     |                                      |
| 11 | exp chronic disease/ and (multi or multiple or concurren* or complex*).ti,ab,kf.                                                     | 20443   |                                      |

|    |                                                                                                            |        |                          |
|----|------------------------------------------------------------------------------------------------------------|--------|--------------------------|
| 12 | (comorbid* or co-morbid*).ti,ab,kf,ot. or (komorbid* or ko-morbid*).ot.                                    | 140228 |                          |
| 13 | (multimorbid* or multi*-morbid*).ti,ab,kf,ot.                                                              | 4057   |                          |
| 14 | (polymorbid* or poly morbid*).ti,ab,kf,ot.                                                                 | 292    |                          |
| 15 | multidisease*.ti,ab,kf.                                                                                    | 39     |                          |
| 16 | ((multi or multiple) adj2 (ill or illness* or condition* or disorder* or syndrom* or disease*)).ti,ab,kf.  | 30204  |                          |
| 17 | (complex* adj2 (patient* or disease* or ill or illness* or condition* or disorder*)).ti,ab,kf.             | 42426  |                          |
| 18 | (concurrent* adj2 (disease* or ill or illness* or condition* or disorder*)).ti,ab,kf.                      | 4305   |                          |
| 19 | (multimedica* or multi*-medica* or polymedica* or poly-medica* or polypharmac* or poly-pharmac*).ti,ab,kf. | 8133   |                          |
| 20 | Polypharmacy/                                                                                              | 3790   |                          |
| 21 | or/9-20                                                                                                    | 297020 |                          |
| 22 | 8 and 21                                                                                                   | 110795 | Aged AND Multi-morbidity |
| 23 | exp patient centered care/                                                                                 | 16400  | #23 to #49:              |
| 24 | exp patient satisfaction/                                                                                  | 78556  | Aspect patient-centered  |
| 25 | decision making/                                                                                           | 83248  | care                     |
| 26 | choice behaviour/                                                                                          | 28960  |                          |
| 27 | Health Priorities/                                                                                         | 10119  |                          |
| 28 | ((patient? or client? or person*2) adj2 prefer*).ti,ab,kf.                                                 | 18606  |                          |

|    |                                                                                        |       |
|----|----------------------------------------------------------------------------------------|-------|
| 29 | ((patient? or client? or person*2) adj2 priorit*).ti,ab,kf.                            | 2490  |
| 30 | (treatment adj2 (goal? or preference? or priorit*).ti,ab,kf.                           | 11750 |
| 31 | goal attainment.ti,ab,kf.                                                              | 1550  |
| 32 | (goal oriented* or goaloriented*).ti,ab,kf.                                            | 1425  |
| 33 | goals/                                                                                 | 14804 |
| 34 | (patient cent* adj2 (care or approach* or therap* or treatment or medic*).ti,ab,kf.    | 9128  |
| 35 | (person cent* adj2 (care or approach* or therap* or treatment or medic*).ti,ab,kf.     | 2349  |
| 36 | (client cent* adj2 (care or approach* or therap* or treatment or medic*).ti,ab,kf.     | 556   |
| 37 | (patient oriented adj2 (care or approach* or therap* or treatment or medic*).ti,ab,kf. | 375   |
| 38 | (person oriented adj2 (care or approach* or therap* or treatment or medic*).ti,ab,kf.  | 114   |
| 39 | (client oriented adj2 (care or approach* or therap* or treatment or medic*).ti,ab,kf.  | 19    |
| 40 | (patient cent?redness or client cent?redness or person cent?redness).ti,ab,kf.         | 1408  |
| 41 | (patientcent* or clientcent* or personcent*).ti,ab,kf.                                 | 24    |
| 42 | (patientoriented* or clientoriented* or personoriented*).ti,ab,kf.                     | 4     |

|                                                    |    |                                                                                                                                  |        |                                                                 |
|----------------------------------------------------|----|----------------------------------------------------------------------------------------------------------------------------------|--------|-----------------------------------------------------------------|
| 1<br>2<br>3<br>4<br>5<br>6<br>7<br>8<br>9          | 43 | ((patient*orientier* or klient*orientier* or patient*zentrier* or klient*zentrier* or person*orientier* or person*zentrier*).ot. | 179    |                                                                 |
| 10<br>11<br>12<br>13<br>14                         | 44 | ((patient* or klient* or person*) adj (zentrier* or orientier*)).ot.                                                             | 24     |                                                                 |
| 15<br>16<br>17<br>18<br>19                         | 45 | ((goal* or priorit* or target* or value* or preference*) adj2 (patient* or individual* or person* or client*)).ti,ab,kf.         | 63093  |                                                                 |
| 20<br>21<br>22<br>23<br>24                         | 46 | ((goal* or priorit* or target* or preference*) adj2 treatment*).ti,ab,kf.                                                        | 32182  |                                                                 |
| 25<br>26<br>27<br>28<br>29                         | 47 | ((patient* or client* or person*) adj2 choice*).ti,ab,kf.                                                                        | 9970   |                                                                 |
| 30<br>31<br>32                                     | 48 | shared decision making.ti,ab,kf.                                                                                                 | 5495   |                                                                 |
| 33<br>34<br>35<br>36<br>37<br>38<br>39             | 49 | or/23-48                                                                                                                         | 326625 |                                                                 |
| 40<br>41<br>42<br>43<br>44                         | 50 | 22 and 49                                                                                                                        | 4208   | Aged AND Multi-morbidity AND patient-centered care              |
| 45<br>46<br>47<br>48<br>49<br>50<br>51             | 51 | protocol.ti.                                                                                                                     | 35122  | Textword protocol in title                                      |
| 52<br>53<br>54<br>55<br>56<br>57<br>58<br>59<br>60 | 52 | 21 and 49 and 51                                                                                                                 | 89     | Multi-morbidity AND patient-centered care AND protocol in title |
|                                                    | 53 | 50 or 52                                                                                                                         | 4259   | (Aged AND Multi-morbidity AND patient-centred care)<br>OR       |

|    |                           |         |                                                                  |
|----|---------------------------|---------|------------------------------------------------------------------|
|    |                           |         | (Multi-morbidity AND patient-centred care AND protocol in title) |
| 54 | exp animals/ not humans/  | 4450254 | Exclusion of animals                                             |
| 55 | 53 not 54                 | 4258    |                                                                  |
| 56 | case reports.pt.          | 1875801 | Exclusion of editorials and case reports                         |
| 57 | (case? adj3 report).ti.   | 302363  |                                                                  |
| 58 | editorial.pt.             | 456208  |                                                                  |
| 59 | editorial.ti.             | 34313   |                                                                  |
| 60 | or/56-59                  | 2443711 |                                                                  |
| 61 | 55 not 60                 | 4111    |                                                                  |
| 62 | remove duplicates from 61 | 4080    | Exclusion of duplicates.<br><b>Final result</b>                  |

7

8 / = Medical Subject Heading (MeSH)

9 Exp = exploded Mesh term

10 \* = truncation, any number of characters

11 \*2, \*3 = truncation: from 0 to 2, 0 to 3 characters

12 ? = 0 or 1 character

13 # = 1 character

14 .ti,ab,kf. = title, abstract, keyword heading word

15 .ti. = title

16 .ot. = original title



1  
2  
3  
4  
5  
6  
7  
8  
9  
10  
11  
12  
13  
14  
15  
16  
17  
18  
19  
20  
21  
22  
23  
24  
25  
26  
27  
28  
29  
30  
31  
32  
33  
34  
35  
36  
37  
38  
39  
40  
41  
42  
43  
44  
45  
46  
47  
48  
49  
50  
51  
52  
53  
54  
55  
56  
57  
58  
59  
60

- 17 .mp. = title, abstract, original title, name of substance word, subject heading word, keyword heading
- 18 word, protocol supplementary concept word, rare disease supplementary concept word, unique
- 19 identifier
- 20 .pt. = publication type
- 21 *adjn* = Search terms within *n* words in any order

For peer review only

**Table S3. Key characteristics of the included studies.****Table S3a. Key characteristics – Qualitative cross-sectional studies**

| Source              | Study methods                                                                                                                                                          |                                                |                 | Patient population                       |                 |                       |                 |
|---------------------|------------------------------------------------------------------------------------------------------------------------------------------------------------------------|------------------------------------------------|-----------------|------------------------------------------|-----------------|-----------------------|-----------------|
|                     | Study aim                                                                                                                                                              | Setting, country                               | Data collection | Def of MM                                | Sample (number) | Age: Mean (SD); range | Sex (% females) |
| Bayliss, 2008 (136) | To explore processes of care desired by elderly patients with MM, and that may present competing demands for patients and providers                                    | Population based; USA                          | ssl (f2f)       | ≥ 2 chronic conditions                   | 26              | 65-84                 | 50              |
| Belcher, 2006 (134) | To explore the views of older adults regarding participation in medication decision-making                                                                             | GP & Hospital (outpatient) & Nursing home; USA | ssl (f2f)       | ≥ 2 chronic conditions + ≥ 1 medications | 51              | 77; 65-89             | 63              |
| Beverly, 2008 (94)  | To define, identify, and rank the values and preferences that older adults express in their diabetes care                                                              | Population based; USA                          | FG              | Type 2 diabetes + ≥ 1 comorbidity        | 35              | 75; 60-88             | 57              |
| Beverly, 2011 (95)  | To explore the perceived impact of chronic co-morbid conditions on type 2 diabetes self-management in older patients                                                   | Population based; USA                          | FG              | Type 2 diabetes + ≥ 1 comorbidity        | 32              | 75 (7); 60-88         | 56              |
| Bower, 2012 (96)    | To examine patients' representations of multimorbid long-term conditions and assess how models of illness representation might need modification in the presence of MM | GP; UK                                         | ssl (f2f)       | ≥ 2 chronic conditions                   | 28              | Median 66; 39-89      | 43              |
| Bravo, 2017 (125)   | To identify typologies of decision-making with foreign-born Latino elders with MM who have enrolled in an integrative geriatric health care program                    | Nursing home; USA                              | ssl (f2f)       | ≥ 2 chronic conditions                   | 13              | 75; 65-85             | 77              |
| Brown, 2007 (104)   | To describe how goals for the self-management of hypertension are developed and whether or not they conform to the characteristics of effective goal-setting           | Hospital (outpatient); USA                     | I (f2f)         | Hypertension + comorbidities             | 30              | 70 (9); 50-87         | 100             |

|                            |                                                                                                                                                                                                                                                                     |                                  |                |                                                                   |    |                        |    |
|----------------------------|---------------------------------------------------------------------------------------------------------------------------------------------------------------------------------------------------------------------------------------------------------------------|----------------------------------|----------------|-------------------------------------------------------------------|----|------------------------|----|
| Browne, 2014 (137)         | To examine patient, carer, and professional perspectives on current management of advanced CHF, as well as barriers and facilitators to improved care                                                                                                               | GP & Hospital (inpatient); UK    | FG & ssl (f2f) | CHF (severe)                                                      | 30 | 72; 60-86              | 27 |
| Caldwell, 2007 (39)        | To identify the preferences of patients with advanced CHF regarding communication about their prognosis and its implications                                                                                                                                        | Hospital (outpatient); Canada    | I (f2f)        | CHF (severe)                                                      | 20 | 68; 50-84              | 30 |
| Caughey, 2017 (108)        | To examine how older patients with MM and clinicians balance benefits and harms associated with a medication and in the presence of competing health outcomes                                                                                                       | Hospital (outpatient); Australia | I (f2f)        | ≥2 chronic conditions                                             | 15 | Median; IQR: 79; 73-86 | 53 |
| Cheraghi-Sohi, 2013 a (97) | To explore how patients prioritise their osteoarthritis among all their conditions, which factors underlie this prioritisation, and whether and why these priorities change over time                                                                               | Hospital (outpatient); UK        | 2a             | ≥ 2 chronic conditions<br>Osteoarthritis                          | 30 | 69; 55-86              | 60 |
| Cheraghi-Sohi, 2013 b (98) | To explore how and why people with MM prioritise some long-term conditions over others, what the potential implications may be for self-management activity, and, in turn, suggest how such information may help clinicians negotiate the management of MM patients | GP; UK                           | 2a             | ≥ 2 chronic conditions<br>Osteoarthritis                          | 41 | 68; 39-83              | 44 |
| Clover, 2004 (51)          | To report on a study exploring patients' understanding of their discussions about end-of-life care with nurses in a palliative care setting                                                                                                                         | Hospital (outpatient); Australia | I (f2f)        | Terminal illness                                                  | 11 | 74; 57-85              | 36 |
| DiNapoli, 2016 (106)       | To explore middle-aged and older veterans' current disease-management practices, mental health treatment preferences, and challenges they face in living with MM                                                                                                    | GP; USA                          | ssl (f2f)      | ≥2 score (cumulative Illness Rating Scale for Geriatrics)         | 28 | 64 (6)                 | 21 |
| Ekdahl, 2010 (128)         | To deepen the knowledge of frail elderly patients' preferences for participation in medical decision-making during hospitalisation                                                                                                                                  | Hospital (inpatient); Sweden     | ssl (f2f)      | ≥ 3 chronic conditions                                            | 15 | 84; 75-96              | 67 |
| Etkind, 2017 (170)         | To understand patient experiences of uncertainty in advanced illness and develop a typology of patients' responses and preferences to inform practice                                                                                                               | Hospital (outpatient); UK        | 2a             | Seriously ill patients<br>CHF, COPD, CKD, liver disease or cancer | 30 | 75; 43-95              | 40 |

|                                 |                          |                                                                                                                                                                                                                                  |                                                     |                   |                                                                             |    |                                                        |    |
|---------------------------------|--------------------------|----------------------------------------------------------------------------------------------------------------------------------------------------------------------------------------------------------------------------------|-----------------------------------------------------|-------------------|-----------------------------------------------------------------------------|----|--------------------------------------------------------|----|
| 1<br>2<br>3<br>4<br>5<br>6<br>7 | Fix, 2014<br>(92)        | To understand barriers to hypertension self-management in patients with hypertension and comorbidities                                                                                                                           | GP;<br>USA                                          | ssl (f2f)         | Hypertension<br>+ $\geq 1$ comorbidity                                      | 48 | 60 (10)                                                | 10 |
| 8<br>9<br>10<br>11              | Fried, 2003<br>(151)     | To elicit from patients themselves the aspects of treatment decision-making that are most important to them when making end-of-life treatment decisions                                                                          | Hospital<br>(outpatient);<br>USA                    | FG & ssl<br>(f2f) | Seriously ill<br>patients<br>CHF, COPD, CKD or<br>cancer                    | 23 | 70; 60-84                                              | 35 |
| 12<br>13<br>14<br>15<br>16      | Fried, 2008<br>(53)      | To examine the ways in which older persons with MM think about potentially competing outcomes in order to gain insight into how processes to elicit values regarding these outcomes can be grounded in the patient's perspective | Community;<br>USA                                   | FG                | $\geq 5$ medications                                                        | 66 | 75 (6)                                                 | 67 |
| 17<br>18<br>19<br>20<br>21      | Green, 2015<br>(115)     | To examine older adults' attitudes towards ICD implantation in the context of competing health risks and to explore the determinants of ICD decision-making among a group of patients who had faced the decision in the past     | Hospital<br>(outpatient);<br>USA                    | ssl (tel.)        | ICD +<br>comorbidities +<br>Geriatric<br>syndromes mean<br>(SD): 6.9 (2.7). | 44 | 78 (5)                                                 | 29 |
| 22<br>23<br>24<br>25<br>26      | Gross, 2015<br>(161)     | To understand how older persons with MM approach decisions about cancer screening                                                                                                                                                | Hospital<br>(outpatient),<br>USA                    | ssl (f2f)         | $\geq 2$ chronic<br>conditions<br>+ $\geq 5$ medications                    | 28 | 65-75: 57%<br>76-85: 4%<br>>86: 21%<br>Unknown:<br>18% | 82 |
| 27<br>28<br>29                  | Hansen,<br>2015 (99)     | To identify reasons for disagreement between patients and their GPs on illnesses                                                                                                                                                 | GP;<br>Germany                                      | FG                | $\geq 3$ chronic<br>conditions                                              | 21 | 77; 70-88                                              | 48 |
| 30<br>31<br>32<br>33            | Haverhals,<br>2011 (100) | To understand the medication self-management issues faced by older adults and caregivers that can be addressed by an electronic personal health application                                                                      | Hospital<br>(outpatient) &<br>Nursing homes;<br>USA | FG & ssl<br>(f2f) | $\geq 2$ chronic<br>condition<br>+ $\geq 3$ medications                     | 32 | 82; 73-90                                              | 60 |
| 34<br>35<br>36<br>37<br>38      | Huang, 2005<br>(55)      | To explore self-reported healthcare goals, factors influencing these goals, and self-care practices of older patients with diabetes mellitus                                                                                     | GP; USA                                             | ssl (f2f)         | T2 diabetes<br>+ hypertension or<br>hypercholesterole<br>mia                | 28 | 74; 65-88                                              | 57 |

1  
2  
3  
4  
5  
6  
7  
8  
9  
10  
11  
12  
13  
14  
15  
16  
17  
18  
19  
20  
21  
22  
23  
24  
25  
26  
27  
28  
29  
30  
31  
32  
33  
34  
35  
36  
37  
38  
39  
40  
41  
42  
43  
44  
45  
46

|                       |                                                                                                                                                                                                                                   |                                                        |                |                                                   |    |                                |    |
|-----------------------|-----------------------------------------------------------------------------------------------------------------------------------------------------------------------------------------------------------------------------------|--------------------------------------------------------|----------------|---------------------------------------------------|----|--------------------------------|----|
| Jones, 2015 (56)      | To assess barriers and facilitators to the use of a patient decision aid designed for serious illness                                                                                                                             | Hospital (outpatient); USA                             | FG             | Seriously ill patients                            | 12 | 66; 28-96                      | 66 |
| Kuluski, 2013 (159)   | To compare goals across each patient, caregiver and physician triad to determine alignment                                                                                                                                        | GP; Canada                                             | ssl (f2f)      | ≥ 2 chronic conditions                            | 27 | 82 (8)                         | 44 |
| Lim, 2017 (146)       | To identify what patients with MM describe as most important to their well-being and health                                                                                                                                       | GP; USA                                                | ssl (f2f)      | Type 1 or 2 diabetes + ≥ 2 chronic conditions     | 31 | 69                             | 45 |
| Lindsay, 2009 (86)    | To examine how patients self-manage MM and especially how they prioritise their conditions                                                                                                                                        | GP; UK                                                 | FG             | Mean conditions: 3.3 (2–8)                        | 53 | 63                             | 45 |
| Linsky, 2015 (40)     | To identify patient perspectives on intentional medication discontinuation in order to optimise medication use                                                                                                                    | GP; USA                                                | FG & ssl (f2f) | ≥ 5 medications                                   | 27 | 66                             | 19 |
| Lyle, 2017 (123)      | To explore older people's experiences of living with neurogenic claudication, their preferences for physiotherapy treatment provision and associated outcomes in order to inform an intervention to be tested in a clinical trial | Hospital (outpatient); UK                              | ssl (f2f)      | Lumbar spinal stenosis + comorbidities            | 15 | 75; 69-80                      | 40 |
| Manias, 2007 (101)    | To investigate perceptions of and experiences with managing drug regimens from the perspectives of patients with osteoarthritis and coexisting chronic conditions and of healthcare professionals from diverse backgrounds        | Hospital outpatient & consumer organisation; Australia | FG             | Osteoarthritis + comorbidities                    | 34 | male: 75 (4)<br>female: 67 (9) | 79 |
| McKillop, 2013 (42)   | To explore attitudes towards medicines, polypharmacy and adherence in patients with CKD                                                                                                                                           | Hospital (outpatient); UK                              | ssl (f2f)      | CKD                                               | 10 | 60; 29-82                      | 50 |
| McPherson, 2014 (171) | To explore and describe patients' and caregivers' perspectives and roles concerning pain management at home                                                                                                                       | Community; Canada                                      | ssl (f2f)      | Advanced cancer receiving palliative care at home | 18 | 78 (9)                         | 56 |
| Moen, 2009 (102)      | To conduct an exploratory study describing multiple medicine use from the elderly patient's perspective                                                                                                                           | Population based; Sweden                               | FG             | ≥ 5 medications                                   | 59 | 76; 67-88                      | 51 |
| Morrow, 2004 (135)    | To describe patient-centred instructions for taking CHF medications that were developed as part of a multifaceted pharmacy-based intervention to improve                                                                          | GP; USA                                                | FG             | CHF                                               | 16 | 64                             | 69 |

|                              |                                                                                                                                                                 |                              |           |                                                                                           |     |                                                                       |     |
|------------------------------|-----------------------------------------------------------------------------------------------------------------------------------------------------------------|------------------------------|-----------|-------------------------------------------------------------------------------------------|-----|-----------------------------------------------------------------------|-----|
|                              | medication adherence and health-related outcomes among older adults with CHF                                                                                    |                              |           |                                                                                           |     |                                                                       |     |
| Morrow, 2008 (44)            | To investigate the life and health goals of older adults with diabetes, and to explore the factors that influence their diabetes self-management                | GP; USA                      | ssl (f2f) | Diabetes + hypertension + comorbidities                                                   | 24  | 69                                                                    | 38  |
| Naganathan, 2016 (140)       | To understand how patients, informal caregivers and family physicians perceive the value of various formal and informal supports for older adults with MM       | GP; Canada                   | ssl (f2f) | ≥ 2 chronic conditions                                                                    | 27  | 82 (8)                                                                | 43  |
| Naik, 2016 (147)             | To identify a taxonomy of health-related values that frame goals of care of older, MM adults who recently faced cancer diagnosis and treatment                  | Hospital (outpatient); USA   | I (n.a.)  | Colorectal, head and neck, gastric, or oesophageal cancers<br>Deyo comorbidity index 6.85 | 146 | 65                                                                    | 2   |
| Noël, 2005 (45)*             | To explore collaborative care needs and preferences in primary care patients with MM                                                                            | GP; USA                      | FG        | ≥ 2 chronic conditions                                                                    | 60  | 30-80                                                                 | 20  |
| O'Dell, 2008 (124)           | To increase understanding of the views of frail elderly women in residential care related to quality of life, values, and preferences for pelvic floor care     | Hospital (outpatient); USA   | ssl (f2f) | "Assisted living or long-term care"                                                       | 25  | Assisted living participants: 87; 73-96;<br>Long term care: 81; 65-89 | 100 |
| Pages-Puigdemont, 2016 (103) | To explore factors that impact on drug compliance and to identify strategies to improve it from the perspective of patients with at least one chronic condition | Hospital (outpatient); Spain | FG        | ≥ 1 chronic condition<br>Mean comorbidities: 2.3 (1.7)                                    | 36  | 65; 39-90                                                             | 53  |
| Parks, 2014 (117)            | To explore sociocultural factors that might influence African American and Hispanic patients' decisions regarding joint replacement                             | Hospital (outpatient); USA   | ssl (f2f) | Osteoarthritis + comorbidities                                                            | 36  | 68 (10)                                                               | 80  |
| Piamjariyakul, 2014 (172)    | To explore end-of-life preferences and determine the presence of signed end-of-life advanced directives                                                         | Community; USA               | I (f2f)   | Cardiovascular disease (severe) + comorbidities                                           | 30  | 70                                                                    | 67  |

|                                      |                         |                                                                                                                                                                                                                                               |                                  |            |                                                          |     |                   |    |
|--------------------------------------|-------------------------|-----------------------------------------------------------------------------------------------------------------------------------------------------------------------------------------------------------------------------------------------|----------------------------------|------------|----------------------------------------------------------|-----|-------------------|----|
| 1<br>2<br>3<br>4<br>5<br>6<br>7<br>8 | Proctor, 2008 (93)      | To examine older adults' perceptions of depression among co-occurring social, medical, and functional problems and to compare the priority of depression with that of other problems                                                          | Community; USA                   | ssl (f2f)  | Depression + comorbidities (86%)                         | 40  | 74 (6)            | 90 |
| 9<br>10<br>11                        | Richardson, 2016 (89)   | To identify and elaborate a range of factors that influence how and why patients with comorbid chronic conditions prioritise their conditions                                                                                                 | GP & Hospital (outpatient); USA  | ssl (f2f)  | Comorbidities mean (range): 6 (3-11)                     | 33  | 61-70: 67%        | 6  |
| 12<br>13<br>14                       | Rifkin, 2010 (47)       | To find out how patients prioritise their medical conditions or decide which medications to take                                                                                                                                              | Hospital (outpatient); USA       | ssl (f2f)  | CKD (stages 3-5D)                                        | 20  | 72; 55-84         | 60 |
| 15<br>16<br>17<br>18<br>19           | Ruggiano, 2017 (173)    | To expand current knowledge in the area of chronic health self-management, this study examined perceptions of transportation and health self-management among older adults with chronic conditions (i.e., chronic illnesses and disabilities) | Community; USA                   | ssl (f2f)  | ≥2 chronic conditions (82%)                              | 37  | 77; 60-97         | 68 |
| 20<br>21<br>22<br>23                 | Schellinger, 2018 (149) | To examine whole-person goals of patients with serious illness identified during their last 2 to 3 years of life                                                                                                                              | Community; USA                   | I (f2f)    | CHF, cancer and dementia comorbidity score (SD): 5 (1.5) | 160 | 79 (11)           | 48 |
| 24<br>25<br>26<br>27                 | Schoenberg, 2009 (91)   | Focusing on elders with two or more chronic conditions and low socioeconomic status, to investigate which morbidities older adults prioritise, why, and how they accommodate these conditions.                                                | Community; USA                   | ssl (f2f)  | ≥2 chronic conditions                                    | 41  | 70; 55-90         | 85 |
| 28<br>29<br>30                       | Schoenborn, 2015 (142)  | To characterise current practice and opportunities for improvement in the care of older adults with MM in an internal medicine residency clinic                                                                                               | Hospital (inpatient); USA        | I (f2f)    | ≥2 chronic conditions                                    | 30  | 74 (7)            | 73 |
| 31<br>32<br>33                       | Seah, 2015 (113)        | To gain insight into the decision-making process leading to opting out of dialysis and experience with conservative non-dialytic management from the patients' perspective                                                                    | Hospital (outpatient); Singapore | ssl (f2f)  | CKD (end-stage)                                          | 9   | Median: 81; 61-84 | 44 |
| 34<br>35<br>36<br>37                 | Song, 2013 (48)         | To address patient perspectives on the extent of information provided and how decisions to start dialysis are made                                                                                                                            | Hospital (outpatient); USA       | ssl (tel.) | CKD (dialysis) + CCI ≥ 5-6                               | 99  | 61 (12); 28-89    | 53 |

|                      |                                                                                                                                                                                                      |                                        |           |                          |     |            |    |
|----------------------|------------------------------------------------------------------------------------------------------------------------------------------------------------------------------------------------------|----------------------------------------|-----------|--------------------------|-----|------------|----|
| Stapleton, 2005 (72) | To understand how the association between preferences for life-sustaining treatment and depression or quality of life is important in providing care                                                 | Hospital (outpatient); USA             | I (f2f)   | COPD (Oxygen-prescribed) | 101 | 67; 59-74  | 23 |
| Strachan, 2011 (174) | To examine patients' perspectives on related end-of-life issues                                                                                                                                      | Hospital (outpatient); Canada          | I (f2f)   | ICD + comorbidities      | 30  | 63; 26-87  | 20 |
| Tariman, 2014 (49)   | To examine patient perspectives with regard to the personal and contextual factors relevant to treatment decision-making                                                                             | Hospital (outpatient); USA             | ssl (f2f) | Multiple Myeloma         | 20  | 65 (8)     | 60 |
| Visser, 2009 (114)   | To explore the considerations taken into account by patients making decisions concerning renal replacement therapy                                                                                   | Hospital (outpatient); The Netherlands | I (f2f)   | CKD + comorbidities      | 14  | 77 (7)     | 43 |
| Walker, 2012 (175)   | To explore the experiences of patients attempting to integrate lifestyle changes into their lives                                                                                                    | Hospital (outpatient); UK              | ssl (f2f) | CKD (Stage 4)            | 9   | 76         | 56 |
| Weir, 2017 (133)     | To explore decision-making about polypharmacy among older adults and their companions                                                                                                                | Hospital (outpatient); Australia       | ssl (f2f) | CCI 1-5+: 80%            | 30  | 83; 75-85+ | 63 |
| Zulman, 2015 (105)*  | To understand self-management and health care navigation challenges that patients face due to MM and to identify opportunities to support these patients through new and enhanced eHealth technology | GP; USA                                | FG        | ≥ 3 chronic conditions   | 53  | 59 (11)    | 26 |

**Table S3b. Key characteristics – Qualitative longitudinal studies**

| Source             | Study methods                                                                                                                                                      |                                       |                 | Patient population            |                 |                         |                 |
|--------------------|--------------------------------------------------------------------------------------------------------------------------------------------------------------------|---------------------------------------|-----------------|-------------------------------|-----------------|-------------------------|-----------------|
|                    | Study aim                                                                                                                                                          | Setting, country                      | Data collection | Def of MM                     | Sample (number) | Age: Mean (SD) or range | Sex (% females) |
| Baxter, 2012 (29)* | To increase understanding of disabled and chronically ill people's experiences of revisiting choices by considering events that prompted people to reconsider them | Hospital (outpatient) & Community; UK | I (f2f)         | Chronic conditions + disabled | 20              | 65+: 35%                | 75              |



|                                      |                                                                                                                                                                                                                |                                            |                                      |                                      |                                      |                                      |                                      |
|--------------------------------------|----------------------------------------------------------------------------------------------------------------------------------------------------------------------------------------------------------------|--------------------------------------------|--------------------------------------|--------------------------------------|--------------------------------------|--------------------------------------|--------------------------------------|
| 1<br>2<br>3<br>4<br>5<br>6<br>7<br>8 | 1<br>2<br>3<br>4<br>5<br>6<br>7<br>8                                                                                                                                                                           | 1<br>2<br>3<br>4<br>5<br>6<br>7<br>8       | 1<br>2<br>3<br>4<br>5<br>6<br>7<br>8 | 1<br>2<br>3<br>4<br>5<br>6<br>7<br>8 | 1<br>2<br>3<br>4<br>5<br>6<br>7<br>8 | 1<br>2<br>3<br>4<br>5<br>6<br>7<br>8 | 1<br>2<br>3<br>4<br>5<br>6<br>7<br>8 |
| Klindtworth, 2015 (62)               | To understand how old and very old patients with advanced CHF perceive their disease and to identify their medical, psychosocial and information needs, focusing on the last stages of life                    | Hospital (inpatient & outpatient); Germany | I (f2f)                              | CHF (severe)                         | 25                                   | 85;71-98                             | 56                                   |
| Morris, 2011 (30)*                   | To examine what influences self-management priorities in individuals with multiple long-term conditions and how these change over time                                                                         | GP; UK                                     | ssl (f2f, tel.)                      | ≥ 3 chronic conditions               | 21                                   | 50; 36-84                            | 48                                   |
| Pardon, 2009 (46)                    | To identify preferences of advanced lung cancer patients to receive information and participate in decision-making concerning treatment options, health-care-setting transfers and end-of-life decision-making | Hospital (outpatient); Belgium             | ssl (f2f)                            | Advanced lung cancer                 | 128                                  | 64; 41-86                            | 20                                   |

17  
18  
19  
20  
21  
22  
23  
24  
25  
26  
27  
28  
29  
30  
31  
32  
33  
34  
35  
36  
37  
38  
39  
40  
41  
42  
43  
44  
45  
46

**Table S3c. Key characteristics – Quantitative cross-sectional studies (observational)**

| Source                | Study methods                                                                                                                                                                                                                   |                           |                 | Patient population     |                 |                                      |                 |
|-----------------------|---------------------------------------------------------------------------------------------------------------------------------------------------------------------------------------------------------------------------------|---------------------------|-----------------|------------------------|-----------------|--------------------------------------|-----------------|
|                       | Study aim                                                                                                                                                                                                                       | Setting, country          | Data collection | Def of MM              | Sample (number) | Age: Mean (SD) or range              | Sex (% females) |
| Ainslie, 1994 (37)**  | To examine hypotheses that elderly persons refusing minimally described treatment might choose nonaggressive treatment if options were described, and that persons refusing treatment would want an active decision-making role | Community; USA            | S               | ≥2 chronic conditions  | 116             | [older patients]                     | 75              |
| Buttery, 2014 (145)   | To investigate older CHF patients' preferences from hospital, community and home-based service models, and sociodemographic and clinical factors associated with these preferences                                              | Hospital (inpatient); UK  | S               | CHF (moderate-severe)  | 106             | 78 (7)                               | 38              |
| Chanouzas, 2012 (110) | To examine how patient choice of different treatment modalities [haemodialysis, peritoneal dialysis and conservative management] is influenced by personal and demographic parameters                                           | Hospital (outpatient); UK | S               | CKD (pre-dialysis)     | 118             | 67 (14)                              | 48              |
| Chi, 2017 (126)       | To explore preferences for health care decision making among older adults, and identify MM profiles associated                                                                                                                  | Population based; USA     | S               | ≥ 2 chronic conditions | 2,017           | 65-74: 55%<br>75-84: 34%<br>≥85: 12% | 57              |

|                      |                                                                                                                                                                                                                                                            |                               |          |                                   |                   |                           |                   |
|----------------------|------------------------------------------------------------------------------------------------------------------------------------------------------------------------------------------------------------------------------------------------------------|-------------------------------|----------|-----------------------------------|-------------------|---------------------------|-------------------|
|                      | with preferring less active, i.e., passive, participation among older US adults                                                                                                                                                                            |                               |          |                                   |                   |                           |                   |
| Chiu, 2016 (50)      | To determine the Decision Control Preferences (DCP) of diverse, older adults and whether DCPs are associated with participant characteristics, advance care planning, and communication satisfaction                                                       | Hospital (outpatient); USA    | S        | ≥ 2 chronic conditions            | 146               | 71 (10)                   | 41                |
| Collins, 2004 (127)  | To determine whether psychological variables, particularly depression, influence patients' willingness to share medical decisions with family members or friends                                                                                           | Hospital (outpatient); USA    | Ic (f2f) | Seriously ill patients<br>CCI ≥ 5 | 95                | 70; 44-85                 | 2                 |
| Davison, 2010 (176)  | To evaluate end-of-life care preferences of CKD patients to help identify gaps between current end-of-life care practice and patients' preferences and to help prioritise and guide future innovation in end of-life care policy                           | Hospital (outpatient); Canada | S        | CKD (stage 4 and 5)               | 584               | 68 (14)                   | 46                |
| De Vries, 2015 (109) | To assess whether patients' willingness to add a blood pressure-lowering drug and the importance they attach to specific treatment characteristics differ among age groups in patients with type 2 diabetes                                                | Community; The Netherlands    | S        | Diabetes + Hypertension           | 151               | 68 (9)                    | 42                |
| Downey, 2013 (79)    | To investigate patient preferences for life-sustaining therapies, clinicians' accuracy in understanding those preferences, and predictors of patient preference and clinician error                                                                        | GP; USA                       | S        | COPD                              | 196               | 69 (10); 39-91            | 0                 |
| Ehman, 2017 (138)    | To test if multimorbidity patients may value continuity more highly than healthy patients, and thus may prefer to wait to see their primary care physician (PCP)                                                                                           | GP; USA                       | S        | MM<br>Tier score: 3 or 4          | 193               | 62 (65+: 119)             | 58                |
| Ekdahl, 2011 (129)   | To investigate the preferred and the actual degree of control, i.e. the role elderly people with co-morbidities wish to assume and actually had with regard to information and participation in medical decision making during their last stay in hospital | Hospital (inpatient); Sweden  | S        | ≥ 3 chronic conditions            | 156               | 83; 76-98                 | 51                |
| Elie, 2018 (177)     | To compare SPMI and CMI patients' end-of-life care preferences and comfort level with end-of-life care discussions, and identify potential predictors of interest in medical assistance in dying                                                           | Hospital (outpatient); Canada | S        | SPMI and CMI                      | SPMI; 106; CMI 95 | SPMI 66 (13); CMI 63 (13) | SPMI: 63; CMI: 60 |

|                      |                                                                                                                                                                                                                                                            |                                        |          |                                                                     |       |                                      |    |
|----------------------|------------------------------------------------------------------------------------------------------------------------------------------------------------------------------------------------------------------------------------------------------------|----------------------------------------|----------|---------------------------------------------------------------------|-------|--------------------------------------|----|
| Flynn, 2007 (178)    | To explore relationships between five factors of personality and four preference types that account for multiple components of the health care decision-making process (information exchange, deliberation, and selection of treatment choice)             | Population based; USA                  | S        | Mean OARS conditions: 3.8 (2.5);<br>Mean medications: 2.8 (2.5)     | 5,830 | 64 (1)                               | 54 |
| Fox, 2018 (122)      | To explore older hospitalised patients' perceived acceptability of, and preference for, two low-intensity early activity interventions (bed-to-sitting and sitting-to-walking), and characteristics associated with perceived acceptability and preference | Hospital (inpatient); Canada           | S        | ≥2 chronic conditions                                               | 60    | 79 (8)                               | 53 |
| Fried, 1994 (179)    | To characterise the limitation of care in routine geriatric practice in advance of and at the time of a patient's final episode of illness.                                                                                                                | GP; USA                                | Chart    | Seriously ill patients<br>CHF, COPD, CKD or cancer                  | 59    | 84 (8)                               | 85 |
| Fried, 2002a (180)   | To examine the effects of the burden of treatment and a variety of possible outcomes on the preferences for care expressed by older patients with serious illnesses                                                                                        | Hospital (inpatient & outpatient); USA | lc (f2f) | Seriously ill patients<br>CHF, COPD, CKD or cancer                  | 226   | 73 (7)                               | 43 |
| Fried, 2002b (81)    | To develop a patient-centred measure of treatment preference applicable across a range of diseases and treatment decisions                                                                                                                                 | Hospital (inpatient & outpatient); USA | Survey   | Seriously ill patients<br>CHF, COPD, CKD or cancer                  | 125   | 73 (7)                               | 43 |
| Fried, 2011a (181)** | To explore the use of a simple tool to elicit older persons' health outcome priorities                                                                                                                                                                     | GP; USA                                | lc (f2f) | ≥ 4 chronic conditions (69%)<br>+ ≥ 4 medications (49%)             | 357   | [older patients]                     | 75 |
| Fried, 2011b (153)   | To develop and test a simple tool to elicit the preferences of older persons based on prioritisation of universal health outcomes                                                                                                                          | Community housing; USA                 | lc (f2f) | Hypertension + fall risk<br>Mean chronic conditions (SD): 2.9 (1.1) | 81    | 65-74: 16%<br>75-84: 54%<br>85+: 30% | 69 |
| Girones, 2012 (119)  | To examine the relationships between preferences and chemotherapy use in this group of patients                                                                                                                                                            | Hospital (inpatient); Spain            | S        | Lung cancer + comorbidities (84%).                                  | 83    | 77; 70-91                            | 24 |

|                       |                                                                                                                                                                                                                                |                                              |   |                                                                                          |       |                                     |                      |
|-----------------------|--------------------------------------------------------------------------------------------------------------------------------------------------------------------------------------------------------------------------------|----------------------------------------------|---|------------------------------------------------------------------------------------------|-------|-------------------------------------|----------------------|
| Green, 2016 (116)     | To explore patients' perceptions of their decision-making experiences related to ICDs                                                                                                                                          | Hospital (outpatient); USA                   | S | ICD + comorbidities (71%)                                                                | 295   | 65-74: 25%<br>75-84: 23%<br>85+: 3% | 22                   |
| Gum, 2010 (139)       | To examine use of behavioural health services, treatment preferences, and facilitators and barriers to service use in older adults receiving home-based services within the aging network                                      | Aging network agencies; USA                  | S | ≥ 2 chronic conditions<br>No medication group: 4.4 (2.1);<br>Medication group: 5.7 (2.8) | 142   | 75 (8)                              | 80                   |
| Hamelinck, 2016 (120) | To examine patients' preferences for adjuvant chemotherapy and adjuvant hormonal therapy, factors related to minimally required benefit, and patients' self-reported motivations                                               | Hospital (outpatient); The Netherlands       | S | Advanced cancer + comorbidities                                                          | 81    | Median: 61;<br>42-86                | 100                  |
| Hopper, 2016 (54)     | Use questionnaires to examine the attitudes of patients and prescribing clinicians to medication withdrawal                                                                                                                    | Hospital (inpatient & outpatient); Australia | S | CHF + ≥ 5 medications                                                                    | 85    | 61 (12)                             | 27                   |
| Janssen, 2011 (182)   | To assess life-sustaining treatment preferences, advance care planning, and the quality of end-of-life care communication in Dutch outpatients with clinically stable but severe COPD or CHF                                   | Hospital (outpatient); The Netherlands       | S | COPD or CHF (severe)                                                                     | 185   | COPD 66 (9); CHF: 76 (8)            | COPD: 38;<br>CHF: 32 |
| Janssen, 2013 (183)   | To understand the preferences for life-sustaining treatments of outpatients on dialysis and to study the quality of patient-physician communication about end-of-life care and barriers and facilitators to this communication | Hospital (outpatient); The Netherlands       | S | CKD (Dialysis)                                                                           | 80    | 62 (16)                             | 40                   |
| Janssen, 2015 (154)   | To rate the relative importance of different outcomes for haemodialysis patients and to analyse whether the relative importance differed among subgroups of patients                                                           | Hospital (outpatient); Germany               | S | CKD (Dialysis)                                                                           | 4,518 | 67 (14)                             | 42                   |
| Jorgensen, 2013 (57)  | To identify potential barriers to adjuvant chemotherapy, use in older patients by examining the associations between patient age, factors influencing chemotherapy                                                             | Hospital (outpatient); Australia             | S | Colon cancer + ≥1 chronic condition                                                      | 35    | 74 (5)                              | 47                   |

|                           |                                                                                                                                                                                                   |                                  |          |                                                                            |       |                                    |    |
|---------------------------|---------------------------------------------------------------------------------------------------------------------------------------------------------------------------------------------------|----------------------------------|----------|----------------------------------------------------------------------------|-------|------------------------------------|----|
|                           | treatment decisions, and preferences for information and decision-making involvement                                                                                                              |                                  |          |                                                                            |       |                                    |    |
| Junius-Walker, 2011 (84)  | To disclose patients' and doctors' perspectives on individual health and treatment priorities                                                                                                     | GP; Germany                      | Ic (f2f) | Mean health problems (SD): 11.9 (5.4)                                      | 123   | 78 (5)                             | 67 |
| Junius-Walker, 2015 (184) | To examine older patients' perceived burden of their health problems                                                                                                                              | GP; Germany                      | S        | Median of health problems (IQR): 11 (8-15)                                 | 836   | 79 (4)                             | 61 |
| Karel, 2015 (155)         | To examine the individual variability, thematic content, and sociodemographic correlates of valued life abilities and activities among MM veterans diagnosed with life-altering cancer            | Hospital (outpatient); USA       | Ic (f2f) | Head and neck, oesophageal, gastric, or colorectal cancer; CCI 6.85 (4.41) | 144   | 0-70: 51%<br>>70: 23%              | 2  |
| Kerr, 2007 (85)           | To understand how the number, type, and severity of comorbidities influence diabetes patients' self-management and treatment priorities                                                           | Community; USA                   | S        | Diabetes + comorbidities                                                   | 1,191 | <65: 30%<br>65-74: 40%<br>>74: 30% | 53 |
| Krucien, 2015 (31)*       | To identify the preferences of patients with MM for recommendations of the Chronic Care Model                                                                                                     | GP; France                       | S        | ≥ 1 chronic condition + obstructive sleep apnoea syndrome                  | 150   | 61-69: 42%<br>≥ 70: 23%            | 29 |
| Krumholz, 1998 (32)*      | To describe the resuscitation preferences of patients hospitalised with an exacerbation of severe CHF, perceptions of those preferences by their physicians, and the stability of the preferences | Hospital (inpatient); USA        | Ic (f2f) | CHF (severe)                                                               | 936   | 65-74: 28%<br>> 75: 26%            | 48 |
| Lee, 2006 (185)           | To compare attitudes towards making end-of-life decisions in non-demented and mildly demented Chinese subjects                                                                                    | Nursing home; China              | S        | Dementia / no dementia + comorbidities                                     | 56    | 82 (6)                             | 95 |
| Li, 2016 (63)             | To understand treatment preferences of Parkinson patients with regard to end-of-life care                                                                                                         | Hospital (outpatient); Singapore | S        | ≥ 2 chronic conditions<br>Parkinson 54%                                    | 136   | 63                                 | 38 |
| Linsky, 2017 (41)         | To develop a survey instrument that assesses patients' experience with and attitudes toward deprescribing                                                                                         | GP; USA                          | S        | ≥ 5 medications                                                            | 790   | 66-75: 43%,<br>≥ 76: 19%           | 15 |

|                      |                                                                                                                                                                                                                                                      |                                       |          |                                                                                            |     |                                                                  |     |
|----------------------|------------------------------------------------------------------------------------------------------------------------------------------------------------------------------------------------------------------------------------------------------|---------------------------------------|----------|--------------------------------------------------------------------------------------------|-----|------------------------------------------------------------------|-----|
| Maida, 2010 (186)    | To evaluate the correlations that exist between preferences for pursuing active and aggressive medical interventions                                                                                                                                 | Hospital (outpatient); Canada         | S        | Advanced cancer                                                                            | 380 | 73; 19-99                                                        | 56  |
| McDonald, 2011 (87)  | To assess patients' and physicians' perceived importance of clinical problems and to describe the level of concordance between patients and physicians in relation to these problems                                                                 | Hospital (outpatient); Australia      | Ic (f2f) | COPD & asthma                                                                              | 52  | 70 (8); 55-87                                                    | 60  |
| Milic, 2016 (43)     | To (quantify tablet burden in women with metastatic breast cancer, establish which groups of drugs contribute most to this burden and gain insight into patients' attitudes towards oral anti-cancer treatment                                       | Hospital (inpatient & outpatient); UK | S        | Metastatic breast cancer with polypharmacy                                                 | 100 | 60; 31-95                                                        | 100 |
| Moise, 2017 (130)    | To assess whether elevated depressive symptoms are associated with decision-making preference in patients with comorbid chronic illness                                                                                                              | GP; USA                               | S        | Hypertension + depression. CCI: 3.2 (2.4)                                                  | 195 | 64 (9)                                                           | 72  |
| Morton, 2012 a (112) | To quantify pre-dialysis patients' and pre-dialysis caregivers' preferences for treatment-related attributes of kidney dialysis and the trade-offs they were willing to accept in making a choice between the different dialysis modalities          | Hospital (outpatient); Australia      | S        | CKD (end stage)                                                                            | 105 | Median: 63; 55-71                                                | 44  |
| Morton, 2012 b (111) | To determine the most important characteristics of dialysis and the trade-offs patients were willing to make in choosing dialysis instead of conservative care                                                                                       | Hospital (outpatient); Australia      | S        | CKD (end stage)                                                                            | 105 | Median: 63; 55-71                                                | 44  |
| Moss, 2001 (65)      | To examine the attitudes of dialysis patients toward CPR in the dialysis unit                                                                                                                                                                        | Hospital (outpatient); USA            | Ic (f2f) | CKD                                                                                        | 469 | 61 (16)                                                          | 54  |
| Naik, 2011 (131)     | To evaluate the effect of functional health literacy on decision-making preferences; and among those initially preferring a passive decision-making role, to explore how preferences change if their physician actively encourages their involvement | Hospital (outpatient); USA            | S        | Cardiovascular disease<br>Comorbidities: active style 5.98 (1.67); passive style 5.0 (2.1) | 100 | 71 (6) active decision-making;<br>75 (6) passive decision-making | 100 |
| Obrien, 1995 (66)    | To determine life-sustaining treatment preferences among nursing home residents, whether information                                                                                                                                                 | Nursing home; USA                     | Ic (f2f) | > 5 chronic conditions (60%)                                                               | 421 | < 70: 11%<br>70-79: 25%                                          | 80  |

|                              |                                                                                                                                                                                                                                                                                                                                                                                                                           |                                      |          |                                        |       |                           |    |
|------------------------------|---------------------------------------------------------------------------------------------------------------------------------------------------------------------------------------------------------------------------------------------------------------------------------------------------------------------------------------------------------------------------------------------------------------------------|--------------------------------------|----------|----------------------------------------|-------|---------------------------|----|
|                              | regarding CPR affected these preferences, and with whom treatment preferences had been discussed, and to identify factors associated with CPR preferences                                                                                                                                                                                                                                                                 |                                      |          |                                        |       | 80-89: 45%<br>90-103: 19% |    |
| Pandhi, 2008 (141)           | To determine if patients vary in perceptions of safety if interpersonal continuity is disrupted. If so, which characteristics are associated with feeling unsafe?                                                                                                                                                                                                                                                         | Community;<br>USA,                   | S        | Chronic conditions + polypharmacy >80% | 6,827 | 64; 63-66                 | 54 |
| Perret-Guillaume, 2011 (132) | To investigate elderly patients' willingness to accept antihypertensive therapy and their desire for information and for participation in medical decisions                                                                                                                                                                                                                                                               | Hospital (inpatient);<br>Switzerland | S        | Hypertension + comorbidities           | 120   | 84 (7)                    | 80 |
| Rahemi, 2018 (69)            | To investigate the influence of sociodemographic factors, acculturation, ethnicity, health status, and spirituality on older adults' health-related decisions when confronted with a choice between competing options                                                                                                                                                                                                     | Population based;<br>USA             | S        | Seriously ill patients                 | 451   | 75 (8)                    | 32 |
| Reinke, 2011 (70)            | To assess whether a history of depression or active depressive symptoms is associated with preferences for life-sustaining therapies among veterans with COPD                                                                                                                                                                                                                                                             | Hospital (outpatient);<br>USA        | S        | COPD & depression                      | 376   | 70 (10)                   | 3  |
| Robben, 2011 (148)           | To know what a particular patient values most and what his or her care-related goals are                                                                                                                                                                                                                                                                                                                                  | Community;<br>The Netherlands        | Chart    | Frail                                  | 336   | 81; 61-99                 | 70 |
| Rodriguez, 2008 (187)        | To assess patients' preferred role and perceived level of involvement in medical decision making and test the effects of patients' age and role preference on perceived involvement in medical decision making                                                                                                                                                                                                            | GP & Hospital (outpatient);<br>USA   | S (tel.) | CHF (advanced)                         | 90    | 70; 42-88                 | 6  |
| Sharma, 2016 (71)            | To determine knowledge of the CPR process, preference for CPR, and desire to participate in end-of-life decision making amongst older hospitalised patients                                                                                                                                                                                                                                                               | Hospital (inpatient);<br>New Zealand | S        | ≥ 2 chronic conditions<br>CCI 5 (4-10) | 100   | 82; 65-98                 | 50 |
| Sudore, 2010 (188)           | To examine the prevalence of uncertainty concerning advance decisions about life sustaining treatment among chronically ill, racially=ethnically diverse older adults with varying levels of health literacy; and to assess the associations between literacy and race=ethnicity with decisional uncertainty, hypothesising that low literacy and minority status would each be independently associated with uncertainty | Hospital (outpatient);<br>USA        | Ic (f2f) | ≥ 2 chronic conditions                 | 205   | 61 (8)                    | 53 |

|                          |                                                                                                                                                                                         |                                                 |   |                                                                                                       |       |                                       |    |
|--------------------------|-----------------------------------------------------------------------------------------------------------------------------------------------------------------------------------------|-------------------------------------------------|---|-------------------------------------------------------------------------------------------------------|-------|---------------------------------------|----|
| Tamura, 2010 (189)       | To explore preferences for withdrawal and engagement in advance care planning also in terms of age, race and ethnicity                                                                  | Hospital (outpatient); USA                      | S | CKD (end stage)                                                                                       | 61    | 62 (15)                               | 26 |
| Tang, 2015 (73)          | To explore heterogeneity and changes in patterns of life sustaining treatment preferences among 2 independent cohorts of terminally ill patients with cancer recruited a decade apart   | Hospital (outpatient); Taiwan                   | S | Advanced cancer                                                                                       | 4,353 | 65-74: 50%<br>75-85: 20%<br>> 85: 13% | 44 |
| Tinetti, 2008 (156)      | To determine the priority that older adults with coexisting hypertension and fall risk give to optimising cardiovascular outcomes versus fall- and medication symptom- related outcomes | Nursing home; USA                               | S | Hypertension + fall risk (frail patients)                                                             | 123   | 82 (6)                                | 71 |
| Toto, 2015 (160)         | To evaluate the feasibility of generating patient-centred goals using goal attainment scale with older adults who have MM and were recruited through primary care                       | GP; USA                                         | S | ≥ 2 chronic conditions (Geriatric and / or Psychiatry)                                                | 27    | 77 (6)                                | 70 |
| Uhlmann, 1991 (75)       | To investigate whether perceived quality of life is associated with preferences for life-sustaining treatment in older adults                                                           | Hospital (outpatient); USA                      | S | Seriously ill patients                                                                                | 258   | 74                                    | 54 |
| Utens, 2013 (143)        | To investigate patient preference for treatment place, associated factors and patient satisfaction with a community-based hospital-at-home scheme for COPD exacerbations                | Hospital & home care organisations; Netherlands | S | COPD + acute exacerbation<br>CCI > 1: Usual hospital care 27 (39%); Early assisted discharge 32 (46%) | 139   | 68 (11)                               | 62 |
| van Summeren, 2017 (158) | To determine proposed and observed medication changes when using an outcome prioritisation tool during a medication review in general practice                                          | GP; The Netherlands                             | S | ≥ 2 chronic conditions (one cardiovascular disease) + ≥ 5 medications                                 | 59    | Median: 83; 81-86                     | 51 |
| Wieldraaijer, 2018 (144) | To assess what caregivers patients prefer to contact when faced with symptoms during survivorship care, what patient factors are associated with a preferred                            | Hospital (outpatient); Netherlands              | S | Colorectal cancer + comorbidities                                                                     | 260   | 67; 32-94                             | 46 |



|  |                                                                                     |  |  |  |  |  |  |
|--|-------------------------------------------------------------------------------------|--|--|--|--|--|--|
|  | caregiver, and whether the type of symptom is associated with a preferred caregiver |  |  |  |  |  |  |
|--|-------------------------------------------------------------------------------------|--|--|--|--|--|--|

**Table S3d. Key characteristics – Quantitative longitudinal studies (observational)**

| Source                     | Study methods                                                                                                                                                                                                                         |                                        |                 | Patient population                                               |                 |                         |                 |
|----------------------------|---------------------------------------------------------------------------------------------------------------------------------------------------------------------------------------------------------------------------------------|----------------------------------------|-----------------|------------------------------------------------------------------|-----------------|-------------------------|-----------------|
|                            | Study aim                                                                                                                                                                                                                             | Setting, country                       | Data collection | Def of MM                                                        | Sample (number) | Age: Mean (SD) or range | Sex (% females) |
| Brunner-LaRocca, 2012 (28) | To investigate end-of-life and CPR preferences in elderly CHF patients. In addition, predictive factors for willingness to trade survival time for better quality of life, and for wanting resuscitation if necessary, were evaluated | Hospital (outpatient); Switzerland     | S               | CHF (severe)                                                     | 622             | 77 (8)                  | 41              |
| Casarett, 2006 (77)        | To determine whether patient preferences are a barrier to hospice enrolment                                                                                                                                                           | Hospital (inpatient & outpatient); USA | lc (f2f)        | Seriously ill patients CHF, COPD, CKD or cancer                  | 203             | 73; 60-93               | 43              |
| Case, 2013 (150)           | To assess older adults' attitudes toward eliciting health outcome priorities                                                                                                                                                          | Nursing home; USA                      | S               | ≥ 4 chronic conditions (69%), ≥ 1 IADLs (26%) + depression (28%) | 356             | 76 (7)                  | 75              |
| Cosgriff, 2007 (78)        | To determine the association of preferences with end-of-life care                                                                                                                                                                     | Hospital (outpatient); USA             | lc (f2f)        | Seriously ill patients CHF, COPD, CKD or cancer                  | 118             | 73 (7)                  | 42              |
| Dunlay, 2014 (80)          | To evaluate the resuscitation preferences of patients at study enrolment, to describe changes in resuscitation preferences over time, and to assess how resuscitation preferences relate to survival                                  | Hospital (outpatient); USA             | S               | CHF (severe)                                                     | 608             | 74                      | 45              |
| Efficace, 2014 (52)        | To assess preferences for involvement in treatment decisions and requests for prognostic information in newly diagnosed higher-risk MDS patients                                                                                      | Hospital (outpatient); Italy           | S               | MDS with IPSS risk score of intermediate or high risk            | 280             | 70; 32-89               | 37              |

|                      |                                                                                                                                                                                                                                                     |                                        |          |                                                    |       |                  |    |
|----------------------|-----------------------------------------------------------------------------------------------------------------------------------------------------------------------------------------------------------------------------------------------------|----------------------------------------|----------|----------------------------------------------------|-------|------------------|----|
| Fried, 2006 (162)    | To examine changes over time in end-of-life treatment preferences, measured in terms of willingness to undergo treatment based on the health state that would result from the treatment, in a cohort of older persons with advanced chronic illness | Hospital (inpatient & outpatient); USA | Ic (f2f) | Seriously ill patients<br>CHF, COPD, CKD or cancer | 226   | 73 (7)           | 53 |
| Fried, 2007 a (59)   | To determine whether preferences for future life-sustaining treatments change over time in a consistent and predictable manner                                                                                                                      | Community; USA                         | Ic (f2f) | Seriously ill patients<br>CHF, COPD, CKD or cancer | 189   | 73 (7)           | 45 |
| Fried, 2007 b (58)   | To examine changes in treatment preferences over time                                                                                                                                                                                               | GP; USA                                | S        | Seriously ill patients<br>CHF, COPD, CKD or cancer | 226   | 73 (7)           | 43 |
| Hamel, 1999 (60)     | To determine the effect of age on decisions to withhold life-sustaining therapies                                                                                                                                                                   | Hospital (inpatient); USA              | Ic (f2f) | Seriously ill patients                             | 9,105 | Median: 63       | 44 |
| Hamel, 2000 (36)*,** | To review previously published findings about how patient age influenced patterns of care for seriously ill patients                                                                                                                                | Hospital (inpatient); USA              | Ic (f2f) | Seriously ill patients                             | 9,105 | [older patients] | nr |
| Janssen, 2012 (61)   | To investigate 1-year stability of preferences regarding CPR and mechanical ventilation in outpatients with advanced COPD, CHF, or CKD and to identify predictors of changes in preferences                                                         | Hospital (outpatient); The Netherlands | Ic (f2f) | Advanced COPD, CHF or CKD                          | 265   | 67 (13)          | 36 |
| Lynn, 2000 (64)      | To characterise COPD over patients' last 6 months of life                                                                                                                                                                                           | Hospital (inpatient); USA              | Ic (f2f) | COPD + ≥ 3 comorbidities                           | 416   | 72               | 75 |
| Ostermann, 2003 (67) | To ascertain the initial views of a haemodialysis cohort in the UK in terms of their CPR status in the event of an in-hospital cardiac arrest unrelated to dialysis                                                                                 | Hospital (outpatient); UK              | Ic (f2f) | CKD (Haemodialysis)                                | 11    | 74 (10); 46-81   | 50 |
| Parr, 2010 (68)      | To understand age differences in advanced cancer patients' end-of-life experiences                                                                                                                                                                  | Hospital (inpatient); USA              | Ic (f2f) | Advanced cancer<br>CCI: 10.0 (2.7)                 | 126   | 72 (6)           | 50 |

|                     |                                                                                                                                                                                                                                                           |                              |          |                                                                             |       |                           |     |
|---------------------|-----------------------------------------------------------------------------------------------------------------------------------------------------------------------------------------------------------------------------------------------------------|------------------------------|----------|-----------------------------------------------------------------------------|-------|---------------------------|-----|
| Rothman, 2007 (107) | To assess the frequency of, reasons for, factors associated with, and outcomes of treatment refusal among older persons with advanced chronic disease                                                                                                     | Hospital (outpatient); UK    | Ic (f2f) | Advanced cancer, CHF or COPD                                                | 226   | 74 (7)                    | 43  |
| Suggs, 2017 (118)   | To analyse factors associated with selection of the following treatment modalities (breast conservation surgery, mastectomy, and contralateral prophylactic mastectomy) in a rural West Virginia tertiary care hospital                                   | Hospital (outpatient); USA   | Chart    | Breast Cancer (early stage)<br>CCI mean (SD):<br>BCS 2.2 (0.5); M 2.4 (0.7) | 226   | 74 (7)                    | 43  |
| Tang, 2016 (33)*    | To explore longitudinal changes in life sustaining treatment preferences and their associations with accurate prognostic awareness, physician-patient end-of-life care discussions, and depressive symptoms in terminally ill cancer patients' final year | Hospital (inpatient); Taiwan | Ic (f2f) | Advanced cancer                                                             | 302   | >65: 32%                  | 43  |
| Teno, 2000 (74)     | To evaluate decision-making and outcomes in seriously ill patients with an intensive care unit stay of at least 14 days                                                                                                                                   | Community; USA               | Ic (f2f) | Seriously ill patients                                                      | 1,264 | BCS:62 (12)<br>M: 61 (13) | 100 |
| Weeks, 1998 (76)    | To test the hypothesis that among terminally ill cancer patients an accurate understanding of prognosis is associated with a preference for therapy that focuses on comfort over attempts at life extension                                               | Hospital (inpatient); USA    | Ic (f2f) | Advanced cancer                                                             | 917   | 62                        | 38  |
| Wright, 2010 (34)*  | To examine whether patients' desire for life extending therapy was associated with their end-of-life care                                                                                                                                                 | Hospital (outpatient); USA   | S        | Advanced cancer                                                             | 301   | 60-69: 28%<br>> 70: 21%   | 47  |
| Zafar, 2013 (35)*   | To determine how patient's preferences guide the course of palliative chemotherapy for advanced colorectal cancer                                                                                                                                         | Hospital (outpatient); USA   | S        | Metastatic colorectal cancer                                                | 702   | 65-74: 25%<br>75: 27%     | 38  |
| Zulman, 2010 (90)   | To understand patterns of patient-provider concordance in the prioritisation of health conditions in patients with MM                                                                                                                                     | GP; USA                      | S        | Diabetes + hypertension + comorbidities                                     | 1,169 | 65 (11)                   | nr  |

Table 3e. Key characteristics – Quantitative study (interventional)

| Source | Patient population |
|--------|--------------------|
|--------|--------------------|

|                          | Study aim                                                                                                                                           | Setting, country | Intervention                             | Randomisation                | Data collection | Def of MM                  | Sample (number)         | Age: Mean (SD) or range | Sex (% females) |
|--------------------------|-----------------------------------------------------------------------------------------------------------------------------------------------------|------------------|------------------------------------------|------------------------------|-----------------|----------------------------|-------------------------|-------------------------|-----------------|
| Junius-Walker, 2012 (83) | To investigate whether a structured priority-setting consultation reconciles the often-differing doctor-patient views on the importance of problems | GP; Germany      | Structured priority-setting consultation | CRT (randomisation unit=GPs) | S               | Mean health problems: 11.4 | 317*** (IG=174; CG=143) | 78                      | 67              |

**Table S3f. Key characteristics – Mixed-methods studies**

| Source                   | Study aim                                                                                                                                                                                                                                | Setting, country              | Data collection | Patient population                                                    |                 |                                     |                 |
|--------------------------|------------------------------------------------------------------------------------------------------------------------------------------------------------------------------------------------------------------------------------------|-------------------------------|-----------------|-----------------------------------------------------------------------|-----------------|-------------------------------------|-----------------|
|                          |                                                                                                                                                                                                                                          |                               |                 | Def of MM                                                             | Sample (number) | Age: Mean (SD) or range             | Sex (% females) |
| Adams, 2013 (190)        | To investigate the ease with which patients of differing functional ability use three types of multi-compartment medication device and whether some types are easier to use than others                                                  | Hospital (inpatient); USA     | S & I (f2f)     | 1 - 15 medications (median 5)                                         | 50              | Median: 85; 77-98                   | 76              |
| Puts, 2017 (121)         | To better understand the treatment decision process from all perspectives                                                                                                                                                                | Hospital (outpatient); Canada | S & I (f2f)     | Advanced cancer                                                       | 32              | 63–69: 9%<br>70–79: 56%<br>80+: 34% | 31              |
| van Summeren, 2016 (157) | To explore an outcome prioritisation tool in eliciting individuals' preferred health outcomes (remaining alive, maintaining independence, reducing pain, reducing other symptoms) in the context of medication review in family practice | GP; The Netherlands           | S & I (f2f)     | ≥ 2 chronic conditions (one cardiovascular disease) + ≥ 5 medications | 60              | 84 (4)                              | 52              |

CCI=Charlson Comorbidity Index; CHF=Chronic Heart Failure; CKD=Chronic Kidney Disease; CMI=Chronic Medically Ill; COPD=Chronic Obstructive Pulmonary Disease; CPR=CardioPulmonary Resuscitation; CRT=Cluster Randomised Controlled Trial; f2f=face-to-face; FG=Focus Groups; GPs=General Practice; IADL=Instrumental Activity of Daily Living; ICD=Implantable Cardioverter Defibrillator; I=open-ended questions interview; Ic=closed-ended questions

1  
2  
3  
4  
5  
6  
7  
8  
9  
10  
11  
12  
13  
14  
15  
16  
17  
18  
19  
20  
21  
22  
23  
24  
25  
26  
27  
28  
29  
30  
31  
32  
33  
34  
35  
36  
37  
38  
39  
40  
41  
42  
43  
44  
45  
46

interview; IPSS=International Prognostic Scoring System; IQR=Interquartile Range; MDS=Myelodysplastic Syndromes; MM=Multimorbidity; n=number; nr=not reported; OARS=Older Americans Resources and Services; S=Survey; SD=Standard Deviation; SPMI=Severe and Persistent Mental Illness; ssl=semi-structured interviews; ssl (tel.) = semi-structured interviews (telephone); UK=United Kingdom; USA=United States of America; 2a=Secondary analysis.

\* The study included a larger sample based on different (younger) age groups. In the present evidence map, only data from patients of 60 years of age or older were considered. Studies are included if preferences of older patients are addressed separately in the study, even when they included younger populations.

\*\*The study did not report descriptives of age but mentions the included population are "older patients".

\*\*\*Number of patients analysed.

For peer review only

**Table S4. Excluded studies and reasons for exclusion.**

| Source                                                                                                                                                                                                                                                                                               | Reason for exclusion                |
|------------------------------------------------------------------------------------------------------------------------------------------------------------------------------------------------------------------------------------------------------------------------------------------------------|-------------------------------------|
| ———. 2014. 'Abstracts of Papers Presented at the Health Services Research and Pharmacy Practice Conference, HSRPP 2014', International Journal of Pharmacy Practice. Conference: Health Services Research and Pharmacy Practice Conference, HSRPP, 22.                                               | Document type: Editorials & reviews |
| ———. 2018. 'Poster Abstracts - Post Acute and Long Term Care Medicine 2018', Journal of the American Medical Directors Association. Conference: Society for Post Acute and Long Term Care Medicine Annual Conference, 19.                                                                            | Document type: Editorials & reviews |
| Adams, E. K., R. Houchens, G. E. Wright, and J. Robbins. 1991. 'Predicting hospital choice for rural Medicare beneficiaries: the role of severity of illness', Health Services Research, 26: 583-612.                                                                                                | Population: Not multimorbid         |
| Adeniji, C., C. Kenning, P. A. Coventry, and P. Bower. 2015. 'What are the core predictors of 'hassles' among patients with multimorbidity in primary care? A cross sectional study', BMC Health Services Research, 15: 255.                                                                         | Outcome: Preferences not addressed  |
| Aikens, J. E., D. E. Nease Jr, and M. S. Klinkman. 2008. 'Explaining patients' beliefs about the necessity and harmfulness of antidepressants', Annals of Family Medicine, 6: 23-29.                                                                                                                 | Population: Age <60 yrs.            |
| Akpan, A., C. Roberts, G. Turner, and J. Banerjee. 2017. 'Developing an internationally agreed standard set of health outcome measures for older people', Age and Ageing, 46 (Supplement 1): i35.                                                                                                    | Outcome: Preferences not addressed  |
| Al Onazi, M., M. Al Jondeby, M. Azeem, and A. Al Sayyari. 2011. 'Factors affecting Saudi hemodialysis patients' perception of healthcare providers' empathy', Arab journal of nephrology and transplantation, 4: 71-76.                                                                              | Outcome: Preferences not addressed  |
| Alami, S., D. Desjeux, M. M. Lefevre-Colau, A. S. Boisgard, E. Bocard, F. Rannou, and S. Poiraudau. 2011. 'Management of pain induced by exercise and mobilization during physical therapy programs: views of patients and care providers', BMC Musculoskeletal Disorders, 12: 172.                  | Population: Age <60 yrs.            |
| Albada, A., and M. Triemstra. 2009. 'Patients' priorities for ambulatory hospital care centres. A survey and discrete choice experiment among elderly and chronically ill patients of a Dutch hospital', Health Expect, 12: 92-105.                                                                  | Population: Age <60 yrs.            |
| Alderman, A. K., S. T. Hawley, J. Waljee, M. Mujahid, M. Morrow, and S. J. Katz. 2008. 'Understanding the impact of breast reconstruction on the surgical decision-making process for breast cancer', Cancer, 112: 489-94.                                                                           | Population: Age <60 yrs.            |
| Allen, D., V. Badro, L. Denyer-Willis, M. Ellen Macdonald, A. Pare, T. Hutchinson, P. Barre, R. Beauchemin, H. Bocti, A. Broadbent, and S. R. Cohen. 2015. 'Fragmented care and whole-person illness: Decision-making for people with chronic end-stage kidney disease', Chronic Illness, 11: 44-55. | Outcome: Preferences not addressed  |
| AlRuthia, Yazed Sulaiman. 2016. 'The value of online medication rating systems to older adults and their association with self-reported outcomes', 76.                                                                                                                                               | Outcome: Preferences not addressed  |

1  
2  
3  
4  
5  
6  
7  
8  
9  
10  
11  
12  
13  
14  
15  
16  
17  
18  
19  
20  
21  
22  
23  
24  
25  
26  
27  
28  
29  
30  
31  
32  
33  
34  
35  
36  
37  
38  
39  
40  
41  
42  
43  
44  
45  
46

|                                                                                                                                                                                                                                                                                                                                                              |                                       |
|--------------------------------------------------------------------------------------------------------------------------------------------------------------------------------------------------------------------------------------------------------------------------------------------------------------------------------------------------------------|---------------------------------------|
| Alsinnawi, M., A. E. Slee, J. S. Banerji, K. L. Dahl, S. Akapame, Iii J. D. Massman, E. M. Wolff, and J. M. Corman. 2016. 'Does a clear understanding of life expectancy increase decisional conflict and anxiety for men with newly diagnosed prostate cancer?', <i>Journal of Urology</i> , 1): e31.                                                       | Document type: Conference proceedings |
| Amblas-Novellas, J., J. Espauella, L. Rexach, B. Fontecha, M. Inzitari, C. Blay, and X. Gomez-Batiste. 2015. 'Frailty, severity, progression and shared decision-making: A pragmatic framework for the challenge of clinical complexity at the end of life', <i>European Geriatric Medicine</i> , 6: 189-94.                                                 | Population: Age <60 yrs.              |
| Anonymous. 2013. '2013 CAEP/ACMU Scientific Abstracts, CAEP 2013', <i>Canadian Journal of Emergency Medicine</i> , 15 (Suppl 1): S1.                                                                                                                                                                                                                         | Document type: Editorials & reviews   |
| Apkarian, A. Vania, Yamaya Sosa, Beth R. Krauss, P. Sebastian Thomas, Bruce E. Fredrickson, Robert E. Levy, R. Norman Harden, and Dante R. Chialvo. 2004. 'Chronic pain patients are impaired on an emotional decision-making task', <i>Pain</i> , 108: 129-36.                                                                                              | Population: Age <60 yrs.              |
| Arain, A., M. Tammaa, F. Chaudhary, S. Gill, S. Yousuf, N. Bangalore-Vittal, P. Singh, S. Jabeen, S. Ali, Y. Song, and N. J. Azar. 2016. 'Communicating the diagnosis of psychogenic nonepileptic seizures: The patient perspective', <i>Journal of Clinical Neuroscience</i> , 28: 67-70.                                                                   | Population: Age <60 yrs.              |
| Arends, R. Y., C. Bode, E. Taal, and M. A. Van de Laar. 2013. 'The role of goal management for successful adaptation to arthritis', <i>Patient Education &amp; Counseling</i> , 93: 130-8.                                                                                                                                                                   | Population: Not multimorbid           |
| Arora, N. K., B. B. Reeve, R. D. Hays, S. B. Clauser, and I. Oakley-Girvan. 2011. 'Assessment of quality of cancer-related follow-up care from the cancer survivor's perspective', <i>Journal of Clinical Oncology</i> , 29: 1280-9.                                                                                                                         | Population: Not multimorbid           |
| Aspinall, P. A., Z. K. Johnson, A. Azuara-Blanco, A. Montarzino, R. Brice, and A. Vickers. 2008. 'Evaluation of quality of life and priorities of patients with glaucoma', <i>Investigative Ophthalmology and Visual Science</i> , 49: 1907-15.                                                                                                              | Population: Not multimorbid           |
| Audulv, Å, K. Norbergh, K. Asplund, and Å Hörnsten. 2009. 'An ongoing process of inner negotiation -- a Grounded Theory study of self-management among people living with chronic illness', <i>Journal of Nursing &amp; Healthcare of Chronic Illnesses</i> , 1: 283-93.                                                                                     | Population: Age <60 yrs.              |
| Auerbach, A. D., R. Katz, S. Z. Pantilat, R. Bernacki, J. Schnipper, P. Kaboli, T. Wetterneck, D. Gonzales, V. Arora, J. Zhang, and D. Meltzer. 2008. 'Factors associated with discussion of care plans and code status at the time of hospital admission: Results from the Multicenter Hospitalist Study', <i>Journal of Hospital Medicine</i> , 3: 437-45. | Outcome: Preferences not addressed    |
| Bagge, M., J. Tordoff, P. Norris, and S. Heydon. 2013. 'Older people's attitudes towards their regular medicines', <i>J Prim Health Care</i> , 5: 234-42.                                                                                                                                                                                                    | Outcome: Preferences not addressed    |
| Baijal, G., T. Gupta, C. Hotwani, S. G. Laskar, A. Budrukkar, V. Murthy, and J. P. Agarwal. 2012. 'Impact of comorbidity on therapeutic decision-making in head and neck cancer: audit from a comprehensive cancer center in India', <i>Head &amp; Neck</i> , 34: 1251-4.                                                                                    | Population: Age <60 yrs.              |
| Baker, Tamara A., Melissa L. O'Connor, Rosalyn Roker, and Jessica L. Krok. 2013. 'Satisfaction With Pain Treatment in Older Cancer Patients', <i>Journal of Hospice &amp; Palliative Nursing</i> , 15: 455-63.                                                                                                                                               | Outcome: Preferences not addressed    |

|                            |                                                                                                                                                                                                                                                                                                   |                                       |
|----------------------------|---------------------------------------------------------------------------------------------------------------------------------------------------------------------------------------------------------------------------------------------------------------------------------------------------|---------------------------------------|
| 1<br>2<br>3<br>4<br>5      | Ballantyne, P. J., M. A. M. Gignac, and G. A. Hawker. 2007. 'A patient-centered perspective on surgery avoidance for hip or knee arthritis: Lessons for the future', <i>Arthritis Care and Research</i> , 57: 27-34.                                                                              | Outcome: Preferences not addressed    |
| 6<br>7<br>8                | Bardai, A., S. H. M. Brown, U. Hafeez, and A. H. Abdelhafiz. 2013. 'Survey exploring elderly patients' viewpoints of the multi-compartment compliance aids', <i>Age and Ageing</i> , 2): ii5.                                                                                                     | Document type: Conference proceedings |
| 9<br>10<br>11              | Barron, J., M. Bedra, J. Wood, and J. Finkelstein. 2014. 'Exploring three perspectives on feasibility of a patient portal for older adults', <i>Studies in health technology and informatics</i> , 202: 181-84.                                                                                   | Outcome: Preferences not addressed    |
| 12<br>13<br>14             | Bartlett Ellis, Rebecca J., and Janet L. Welch. 2017. 'Medication-taking behaviours in chronic kidney disease with multiple chronic conditions: a meta-ethnographic synthesis of qualitative studies', <i>Journal of Clinical Nursing</i> , 26: 586-98.                                           | Document type: Editorials & reviews   |
| 15<br>16<br>17             | Bayliss, E. A., J. F. Steiner, D. H. Fernald, L. A. Crane, and D. S. Main. 2003. 'Descriptions of barriers to self-care by persons with comorbid chronic diseases', <i>Ann Fam Med</i> , 1: 15-21.                                                                                                | Outcome: Preferences not addressed    |
| 18<br>19<br>20             | Beaulaurier, R. L., M. J. Mintzer, D. T. D'Amore, and M. Torres. 2016. 'Social factors in non-urgent use of an emergency department by the elderly', <i>Journal of the American Geriatrics Society</i> , 1): S191-S92.                                                                            | Document type: Conference proceedings |
| 21<br>22<br>23             | Bell, S. P., and A. Saraf. 2014. 'Risk stratification in very old adults: How to best gauge risk as the basis of management choices for patients aged over 80', <i>Progress in Cardiovascular Diseases</i> , 57: 197-203.                                                                         | Outcome: Preferences not addressed    |
| 24<br>25<br>26             | Benham-Hutchins, M., N. Staggers, M. Mackert, A. H. Johnson, and D. deBronkart. 2017. "'I want to know everything": a qualitative study of perspectives from patients with chronic diseases on sharing health information during hospitalization', <i>BMC Health Services Research</i> , 17: 529. | Population: Age <60 yrs.              |
| 27<br>28<br>29             | Bennahum, D. A., W. B. Forman, B. Vellas, and I. L. Albaredo. 1997. 'Life expectancy, comorbidity, and quality of life - A framework of reference for medical decisions', <i>Clinics in Geriatric Medicine</i> , 13: 33-&.                                                                        | Document type: Editorials & reviews   |
| 30<br>31<br>32             | Benson, J., and N. Britten. 2002. 'Patients' decisions about whether or not to take antihypertensive drugs: qualitative study', <i>British Medical Journal</i> , 325: 873-76A.                                                                                                                    | Population: Not multimorbid           |
| 33<br>34<br>35             | Bergin, R., J. Emery, R. Bollard, and V. White. 2017. 'How rural and urban patients in Australia with colorectal or breast cancer experience choice of treatment provider: A qualitative study', <i>European Journal of Cancer Care</i> , 26: n/a-n/a.                                            | Population: Not multimorbid           |
| 36<br>37<br>38             | Berna, F., A. S. Goritz, P. M. Llorca, P. Vidailhet, G. Fond, and S. Moritz. 2017. 'Would I take antipsychotics, if I had psychotic symptoms? Examining determinants of the decision to take antipsychotics', <i>Progress in Neuro-Psychopharmacology and Biological Psychiatry</i> , 77: 155-63. | Population: Age <60 yrs.              |
| 39<br>40<br>41             | Berner, Y. N. 2018. '[Patient Oriented Care in Chronic Conditions]', <i>Harefuah</i> , 157: 228-31.                                                                                                                                                                                               | Outcome: Preferences not addressed    |
| 42<br>43<br>44<br>45<br>46 | Beverly, E. A., L. A. Wray, C. J. Chiu, and C. L. LaCoe. 2014. 'Older Adults' Perceived Challenges With Health Care Providers Treating Their Type 2 Diabetes and Comorbid Conditions', <i>Cd (Clinical Diabetes)</i> , 32: 12-7.                                                                  | Outcome: Preferences not addressed    |



|                       |                                                                                                                                                                                                                                                                                                                                                                                                 |                                     |
|-----------------------|-------------------------------------------------------------------------------------------------------------------------------------------------------------------------------------------------------------------------------------------------------------------------------------------------------------------------------------------------------------------------------------------------|-------------------------------------|
| 1<br>2<br>3<br>4<br>5 | Blackhall, L. J., S. T. Murphy, G. Frank, V. Michel, and S. Azen. 1995. 'ETHNICITY AND ATTITUDES TOWARD PATIENT AUTONOMY', <i>Jama-Journal of the American Medical Association</i> , 274: 820-25.                                                                                                                                                                                               | Population: Not multimorbid         |
| 6<br>7<br>8           | Bleicher, R. J., P. Abrahamse, S. T. Hawley, S. J. Katz, and M. Morrow. 2008. 'The influence of age on the breast surgery decision-making process', <i>Annals of Surgical Oncology</i> , 15: 854-62.                                                                                                                                                                                            | Population: Not multimorbid         |
| 9<br>10<br>11         | Blom, J. W., M. El Azzi, D. M. Wopereis, L. Glynn, C. Muth, and M. L. van Driel. 2015. 'Reporting of patient-centred outcomes in heart failure trials: are patient preferences being ignored?', <i>Heart Failure Reviews</i> , 20: 385-92.                                                                                                                                                      | Outcome: Preferences not addressed  |
| 12<br>13<br>14        | Blome, C., A. Costanzo, E. Dauden, C. Ferrandiz, G. Girolomoni, R. Gniadecki, L. Iversen, A. Menter, K. Michaelis-Wittern, A. Morita, H. Nakagawa, K. Reich, and M. Augustin. 2016. 'Patient-relevant needs and treatment goals in nail psoriasis', <i>Quality of Life Research: An International Journal of Quality of Life Aspects of Treatment, Care &amp; Rehabilitation</i> , 25: 1179-88. | Population: Age <60 yrs.            |
| 15<br>16<br>17        | Boehmer, K. R., A. Abu Dabrh, M. R. Gionfriddo, P. Erwin, and V. M. Montori. 2018. 'Does the chronic care model meet the emerging needs of people living with multimorbidity? A systematic review and thematic synthesis', <i>PLoS ONE</i> , 13: 17.                                                                                                                                            | Document type: Editorials & reviews |
| 18<br>19<br>20        | Boeni, F., K. E. Hersberger, and I. Arnet. 2014. 'Multidrug punch cards in primary care: A mixed methods study on patients' preferences and impact on adherence', <i>Frontiers in Pharmacology</i> , 5 (SEP) (no pagination).                                                                                                                                                                   | Outcome: Preferences not addressed  |
| 21<br>22              | Bokhof, B., and U. Junius-Walker. 2016. 'Reducing Polypharmacy from the Perspectives of General Practitioners and Older Patients: A Synthesis of Qualitative Studies', <i>Drugs and Aging</i> , 33: 249-66.                                                                                                                                                                                     | Document type: Editorials & reviews |
| 23<br>24<br>25<br>26  | Bonney, A., S. C. Jones, and D. Iverson. 2012. 'The older patient, the general practitioner and the trainee: patients' attitudes and implications for training', <i>Education for primary care : an official publication of the Association of Course Organisers, National Association of GP Tutors, World Organisation of Family Doctors</i> , 23: 186-95.                                     | Population: Not multimorbid         |
| 27<br>28              | Bonney, A., S. C. Jones, L. Phillipson, and D. Iverson. 2010. 'General practice registrars - attitudes of older patients', <i>Australian Family Physician</i> , 39: 419-24.                                                                                                                                                                                                                     | Population: Not multimorbid         |
| 29<br>30<br>31<br>32  | Borgsteede, S. D., L. Deliens, C. Graafland-Riedstra, A. L. Francke, G. van der Wal, and D. L. Willems. 2007. 'Communication about euthanasia in general practice: opinions and experiences of patients and their general practitioners', <i>Patient Educ Couns</i> , 66: 156-61.                                                                                                               | Outcome: Preferences not addressed  |
| 33<br>34<br>35        | Borum, M. L., J. Lynn, and Z. Zhong. 2000. 'Blood transfusion administration in seriously ill patients: an evaluation of SUPPORT data. Study to Understand Prognoses and Preferences for Outcomes and Risks of Treatments', <i>Journal of the American Geriatrics Society</i> , 48: S39-43.                                                                                                     | Population: Not multimorbid         |
| 36<br>37<br>38        | Bove, A. M., A. D. Lynch, C. Ammendolia, and M. Schneider. 2018. 'Patients' experience with nonsurgical treatment for lumbar spinal stenosis: a qualitative study', <i>Spine Journal: Official Journal of the North American Spine Society</i> , 18: 639-47.                                                                                                                                    | Population: Not multimorbid         |
| 39<br>40<br>41<br>42  | Bower, P. 2013. 'Multimorbidity in patients with arthritis: Experience of care and self-management', <i>Rheumatology (United Kingdom)</i> , 1): i3.                                                                                                                                                                                                                                             | Duplicates                          |

|                                                                                                                                                                                                                                                                                                                                                         |                                       |
|---------------------------------------------------------------------------------------------------------------------------------------------------------------------------------------------------------------------------------------------------------------------------------------------------------------------------------------------------------|---------------------------------------|
| Bower, P., M. Hann, J. Rick, K. Rowe, J. Burt, M. Roland, J. Protheroe, G. Richardson, and D. Reeves. 2013. 'Multimorbidity and delivery of care for long-term conditions in the English National Health Service: baseline data from a cohort study', <i>Journal of health services research &amp; policy</i> , 18: 29-37.                              | Outcome: Preferences not addressed    |
| Bowling, A., and S. Ebrahim. 2001. 'Measuring patients' preferences for treatment and perceptions of risk', <i>Quality in Health Care</i> , 10: I2-I8.                                                                                                                                                                                                  | Document type: Editorials & reviews   |
| Brabers, A. E. M., T. E. M. van Esch, P. P. Groenewegen, K. Hek, P. Mullenders, L. van Dijk, and J. D. de Jong. 2018. 'Is there a conflict between general practitioners applying guidelines for antibiotic prescribing and including their patients' preferences?', <i>Patient Preference and Adherence</i> , 12: 9-19.                                | Population: Age <60 yrs.              |
| Bratzke, L. C., R. J. Muehrer, K. A. Kehl, K. S. Lee, E. C. Ward, and K. L. Kwekkeboom. 2015. 'Self-management priority setting and decision-making in adults with multimorbidity: A narrative review of literature', <i>International Journal of Nursing Studies</i> , 52: 744-55.                                                                     | Document type: Editorials & reviews   |
| Brazier, J. E., D. Rowen, I. Mavranouzouli, A. Tsuchiya, T. Young, Y. Yang, M. Barkham, and R. Ibbotson. 2012. 'Developing and testing methods for deriving preference-based measures of health from condition-specific measures (and other patient-based measures of outcome)', <i>Health technology assessment (Winchester, England)</i> , 16: 1-114. | Population: Not multimorbid           |
| Bridges, J., J. Hughes, N. Farrington, and A. Richardson. 2015. 'Cancer treatment decision-making processes for older patients with complex needs: a qualitative study', <i>BMJ Open</i> , 5: e009674.                                                                                                                                                  | Population: Age <60 yrs.              |
| Brimblecombe, C., D. Crosbie, W. K. Lim, and B. Hayes. 2014. 'The goals of patient care project: Implementing a proactive approach to patient-centred decision-making', <i>Internal Medicine Journal</i> , 44: 961-66.                                                                                                                                  | Outcome: Preferences not addressed    |
| Burke, J. A., M. Earley, L. D. Dixon, A. Wilke, and S. Puczynski. 2006. 'Patients with diabetes speak: Exploring the implications of patients' perspectives for their diabetes appointments', <i>Health Communication</i> , 19: 103-14.                                                                                                                 | Population: Age <60 yrs.              |
| Burkiewicz, J. S., K. S. Vesta, and A. L. Hume. 2008. 'Improving effectiveness in communicating risk to patients', <i>Consultant Pharmacist</i> , 23: 37-43.                                                                                                                                                                                            | Outcome: Preferences not addressed    |
| Burton, M., F. Armitage, K. Collins, P. Richards, A. Nettleship, K. Lifford, and L. Wyld. 2016. 'The development of an on-line decision tool for health care professionals to aid collaborative decision making with older women with breast cancer', <i>European Journal of Cancer</i> , 2): S136.                                                     | Outcome: Preferences not addressed    |
| Buttery, A., K. Lowton, K. Glaser, and G. Carr-White. 2011. 'Older heart failure patients' preferences for cardiac rehabilitation service models', <i>European Heart Journal</i> , 1): 159.                                                                                                                                                             | Document type: Conference proceedings |
| Calpin, P., A. Imran, and D. Harmon. 2017. 'A Comparison of Expectations of Physicians and Patients with Chronic Pain for Pain Clinic Visits', <i>Pain Practice</i> , 17: 305-11.                                                                                                                                                                       | Population: Age <60 yrs.              |
| Camacho, D., E. Estrada, I. T. Lagomasino, and J. Green. 2015. 'Depression treatment adherence and preferences among older latinos in a specialty geriatric clinic', <i>American Journal of Geriatric Psychiatry</i> , 1): S136-S37.                                                                                                                    | Document type: Conference proceedings |

|                                                                                                                                                                                                                                                                                                                                                                                                                                                                                                          |                                       |
|----------------------------------------------------------------------------------------------------------------------------------------------------------------------------------------------------------------------------------------------------------------------------------------------------------------------------------------------------------------------------------------------------------------------------------------------------------------------------------------------------------|---------------------------------------|
| Campbell, S. M., C. Gately, and L. Gask. 2007. 'Identifying the patient perspective of the quality of mental healthcare for common chronic problems: A qualitative study', <i>Chronic Illness</i> , 3: 46-65.                                                                                                                                                                                                                                                                                            | Population: Age <60 yrs.              |
| Carlin, C. S., J. B. Christianson, P. Keenan, and M. Finch. 2012. 'Chronic illness and patient satisfaction', <i>Health Services Research</i> , 47: 2250-72.                                                                                                                                                                                                                                                                                                                                             | Population: Age <60 yrs.              |
| Caron-Flinterman, J. F., J. E. W. Broerse, J. Teerling, and J. F. G. Bunders. 2005. 'Patients' priorities concerning health research: The case of asthma and COPD research in the Netherlands', <i>Health Expectations</i> , 8: 253-63.                                                                                                                                                                                                                                                                  | Population: Age <60 yrs.              |
| Case, S. M., J. O'Leary, N. Kim, M. E. Tinetti, and T. R. Fried. 2014. 'Relationship between universal health outcome priorities and willingness to take medication for primary prevention of myocardial infarction', <i>Journal of the American Geriatrics Society</i> , 62: 1753-58.                                                                                                                                                                                                                   | Outcome: Preferences not addressed    |
| Case, S. M., V. R. Towle, and T. R. Fried. 2013. 'Considering the balance: Development of a scale to assess patient views on trade-offs in competing health outcomes', <i>Journal of the American Geriatrics Society</i> , 61: 1331-36.                                                                                                                                                                                                                                                                  | Outcome: Preferences not addressed    |
| Cassimatis, Mandy, David J. Kavanagh, and Anthony C. Smith. 2014. 'Perceived needs for supported self-management of type 2 diabetes: A qualitative investigation of the potential for a web-based intervention', <i>Australian Psychologist</i> , 49: 75-85.                                                                                                                                                                                                                                             | Population: Age <60 yrs.              |
| Caughey, G. E., E. Huynh, S. Shakib, J. M. Rose, and J. Swait. 2017. 'Influence of medication risks and benefits on patient and clinician preferences for treatment in multimorbidity: A discrete-choice experiment', <i>Pharmacoepidemiology and Drug Safety</i> , 26 (Supplement 2): 447.                                                                                                                                                                                                              | Document type: Conference proceedings |
| Chang, Wenhong, and Changxiang Chen. 2016. 'Survey of medical treatment and medication status and satisfaction of elderly patients with chronic diseases in Hebei province', <i>Chinese Nursing Research</i> , 30: 22-26.                                                                                                                                                                                                                                                                                | Outcome: Preferences not addressed    |
| Charette, Susan L., Maristela Baruz Garcia, David B. Reuben, Benjamin A. Bensadon, and Benjamin A. Bensadon. 2015. 'Goal-oriented care': 1-19.                                                                                                                                                                                                                                                                                                                                                           | Document type: Editorials & reviews   |
| Chekerov, R., P. Harter, S. Fuxius, L. C. Haker, L. Woelber, L. Muller, P. Klare, W. Abenhardt, Y. Nedkova, I. Yalcinkaya, G. Heinrich, H. Sommer, S. Mahner, P. Wimberger, D. Koensgen-Mustea, R. Richter, G. Oskay-Oezcelik, and J. Sehouli. 2017. 'Preference of elderly patients' to oral or intravenous chemotherapy in heavily pre-treated recurrent ovarian cancer: final results of a prospective multicenter trial', <i>Gynecologic Oncology Research and Practice</i> , 4 (1) (no pagination). | Population: Not multimorbid           |
| Chen, H., W. E. Haley, B. E. Robinson, and R. S. Schonwetter. 2003. 'Decisions for hospice care in patients with advanced cancer', <i>Journal of the American Geriatrics Society</i> , 51: 789-97.                                                                                                                                                                                                                                                                                                       | Population: Not multimorbid           |
| Chen, T. T., T. H. Tung, Y. S. Hsueh, M. H. Tsai, H. M. Liang, K. L. Li, K. P. Chung, and C. H. Tang. 2015. 'Measuring Preferences for a Diabetes Pay-for-Performance for Patient (P4P4P) Program using a Discrete Choice Experiment', <i>Value in Health</i> , 18: 578-86.                                                                                                                                                                                                                              | Population: Not multimorbid           |
| Cheong, L. H., C. L. Armour, and S. Z. Bosnic-Anticevich. 2013. 'Multidisciplinary collaboration in primary care: through the eyes of patients', <i>Australian Journal of Primary Health</i> , 19: 190-7.                                                                                                                                                                                                                                                                                                | Population: Age <60 yrs.              |

|                                                                                                                                                                                                                                                                                                                                    |                                                    |
|------------------------------------------------------------------------------------------------------------------------------------------------------------------------------------------------------------------------------------------------------------------------------------------------------------------------------------|----------------------------------------------------|
| Chia, Y., X. H. Low, A. Chan, and K. Yap. 2012. 'Improving drug-related problems in oncology through technology: Preferences of Asian patients with cancer', <i>International Journal of Pharmacy Practice</i> , 2): 32.                                                                                                           | Population: Not multimorbid                        |
| Chow, A., J. Presseau, I. Perelman, L. Sikora, and D. Fergusson. 2018. 'Personal goal-setting among women living with breast cancer: protocol for a scoping review', <i>Syst Rev</i> , 7: 132.                                                                                                                                     | Population: Not multimorbid                        |
| Chow, A., J. Presseau, I. Perelman, L. Sikora, and D. Fergusson. 2018. 'Personal goal-setting among women living with breast cancer: protocol for a scoping review', <i>Syst Rev</i> , 7: 132.                                                                                                                                     | Document type: Study protocols                     |
| Chung, G. S., R. E. Lawrence, F. A. Curlin, V. Arora, and D. O. Meltzer. 2012. 'Predictors of hospitalised patients' preferences for physician-directed medical decision-making', <i>Journal of Medical Ethics</i> , 38: 77-82.                                                                                                    | Population: Age <60 yrs.                           |
| Clancy, C. M., R. D. Cebul, and S. V. Williams. 1988. 'GUIDING INDIVIDUAL DECISIONS - A RANDOMIZED, CONTROLLED TRIAL OF DECISION-ANALYSIS', <i>American Journal of Medicine</i> , 84: 283-88.                                                                                                                                      | Outcome: Preferences from physicians or caregivers |
| Clarke, G., E. Fistein, A. Holland, M. Barclay, P. Theimann, and S. Barclay. 2017. 'Preferences for care towards the end of life when decision-making capacity may be impaired: A large scale cross-sectional survey of public attitudes in Great Britain and the United States', <i>PLoS ONE</i> , 12: 18.                        | Population: Not multimorbid                        |
| Clarke, L. H., E. V. Bennett, and A. Korotchenko. 2014. 'Negotiating vulnerabilities: how older adults with multiple chronic conditions interact with physicians', <i>Canadian journal on aging = La revue canadienne du vieillissement</i> , 33: 26-37.                                                                           | Outcome: Preferences not addressed                 |
| Clarke, M. G., K. P. Kennedy, and R. P. MacDonagh. 2008. 'Discussing life expectancy with surgical patients: Do patients want to know and how should this information be delivered?', <i>BMC Medical Informatics and Decision Making</i> , 8 (no pagination).                                                                      | Population: Not multimorbid                        |
| Clausen, G., M. Borchelt, C. Janssen, S. Loos, L. Mull, and H. Pfaff. 2006. '[Patient satisfaction and geriatric care - an empirical study]', <i>Zeitschrift fur Gerontologie und Geriatrie</i> , 39: 48-56.                                                                                                                       | Population: Not multimorbid                        |
| Clement, N. D., and R. Burnett. 2013. 'Patient satisfaction after total knee arthroplasty is affected by their general physical well-being', <i>Knee Surgery, Sports Traumatology, Arthroscopy</i> , 21: 2638-46.                                                                                                                  | Outcome: Preferences not addressed                 |
| Clement, N. D., D. Macdonald, R. Burnett, A. H. R. W. Simpson, and C. R. Howie. 2017. 'A patient's perception of their hospital stay influences the functional outcome and satisfaction of total knee arthroplasty', <i>Archives of Orthopaedic and Trauma Surgery</i> , 137: 693-700.                                             | Outcome: Preferences not addressed                 |
| Clever, S. L., L. Jin, W. Levinson, and D. O. Meltzer. 2008. 'Does doctor-patient communication affect patient satisfaction with hospital care? Results of an analysis with a novel instrumental variable', <i>Health Services Research</i> , 43: 1505-19.                                                                         | Population: Age <60 yrs.                           |
| Clough-Gorr, K. M., L. Noti, P. Brauchli, R. Cathomas, M. R. Fried, G. Roberts, A. E. Stuck, F. Hitz, and U. Mey. 2013. 'The SAKK cancer-specific geriatric assessment (C-SGA): a pilot study of a brief tool for clinical decision-making in older cancer patients', <i>BMC Medical Informatics and Decision Making</i> , 13: 93. | Outcome: Preferences not addressed                 |

|                                                                                                                                                                                                                                                                                                                                                                                                                                                                                       |                                       |
|---------------------------------------------------------------------------------------------------------------------------------------------------------------------------------------------------------------------------------------------------------------------------------------------------------------------------------------------------------------------------------------------------------------------------------------------------------------------------------------|---------------------------------------|
| Clyne, B., J. A. Cooper, F. Boland, C. M. Hughes, T. Fahey, S. M. Smith, and team Opti-Script study. 2017. 'Beliefs about prescribed medication among older patients with polypharmacy: a mixed methods study in primary care', <i>British Journal of General Practice</i> , 67: e507-e18.                                                                                                                                                                                            | Outcome: Preferences not addressed    |
| Col, N. F., L. Ngo, J. M. Fortin, R. J. Goldberg, and A. M. O'Connor. 2007. 'Can computerized decision support help patients make complex treatment decisions? A randomized controlled trial of an individualized menopause decision aid', <i>Medical Decision Making</i> , 27: 585-98.                                                                                                                                                                                               | Population: Age <60 yrs.              |
| Combes, G., K. Sein, and K. Allen. 2017. 'How does pre-dialysis education need to change? Findings from a qualitative study with staff and patients', <i>BMC Nephrology</i> , 18 (1) (no pagination).                                                                                                                                                                                                                                                                                 | Population: Not multimorbid           |
| Commisso, E., K. S. McGilton, A. P. Ayala, M. K. Andrew, H. Bergman, L. Beaudet, V. Dube, M. Gray, L. Hale, M. Keatings, E. G. Marshall, J. McElhaney, D. Morgan, E. Parrott, J. Ploeg, T. Sampalli, D. Stephens, I. Vedel, J. Walker, W. P. Wodchis, and M. T. E. Puts. 2017. 'Identifying and understanding the health and social care needs of older adults with multiple chronic conditions and their caregivers: a protocol for a scoping review', <i>BMJ Open</i> , 7: e018247. | Document type: Study protocols        |
| Cooper, V., J. Clatworthy, E. Youssef, C. Llewellyn, A. Miners, M. Lagarde, M. Sachikonye, N. Perry, E. Nixon, A. Pollard, C. Sabin, C. Foreman, and M. Fisher. 2016. 'Which aspects of health care are most valued by people living with HIV in high-income countries? A systematic review', <i>BMC Health Services Research</i> , 16: 677.                                                                                                                                          | Population: Age <60 yrs.              |
| Cooper, V., J. Clatworthy, E. Youssef, N. Perry, E. Nixon, M. Fisher, A. Pollard, C. Llewellyn, A. Miners, M. Lagarde, M. Sachikonye, C. Sabin, and C. Foreman. 2015. 'What aspects of health care are most valued by people living with HIV? Results of a systematic review', <i>HIV Medicine</i> , 2): 74.                                                                                                                                                                          | Population: Age <60 yrs.              |
| Courtin, S., T. Hughes, E. Giovannetti, J. Wolff, C. Rand, and C. Boyd. 2011. 'Experiences of treatment burden in community-dwelling multimorbid older adults and caregivers', <i>Journal of the American Geriatrics Society</i> , 1): S88.                                                                                                                                                                                                                                           | Document type: Conference proceedings |
| Coventry, P. A., N. Small, M. Panagioti, I. Adeyemi and P. Bee. 2015. 'Living with complexity; marshalling resources: a systematic review and qualitative meta-synthesis of lived experience of mental and physical multimorbidity', <i>BMC Family Practice</i> , 16):171                                                                                                                                                                                                             | Document type: Editorials & reviews   |
| Coxon, D., M. Frisher, C. Jinks, K. Jordan, Z. Paskins, and G. Peat. 2015. 'The relative importance of perceived doctor's attitude on the decision to consult for symptomatic osteoarthritis: a choice-based conjoint analysis study', <i>BMJ Open</i> , 5: e009625.                                                                                                                                                                                                                  | Population: Not multimorbid           |
| Coyle, J., and B. Williams. 2001. 'Valuing people as individuals: development of an instrument through a survey of person-centredness in secondary care', <i>Journal of Advanced Nursing</i> , 36: 450-59.                                                                                                                                                                                                                                                                            | Population: Age <60 yrs.              |
| Craftman, A. G., M. Westerbotn, E. von Strauss, P. Hilleras, and L. M. Hammar. 2015. 'Older people's experience of utilisation and administration of medicines in a health- and social care context', <i>Scandinavian Journal of Caring Sciences</i> , 29: 760-68.                                                                                                                                                                                                                    | Outcome: Preferences not addressed    |
| Cybulski, M., L. Cybulski, E. Krajewska-Kulak, M. Orzechowska, and U. Cwalina. 2018. 'Preferences and attitudes of older adults of Bialystok, Poland toward the use of over-the-counter drugs', <i>Clinical Interventions in Aging</i> , 13: 623-32.                                                                                                                                                                                                                                  | Population: Not multimorbid           |

|                                                          |                                                                                                                                                                                                                                                                                                                                                                                                   |                                       |
|----------------------------------------------------------|---------------------------------------------------------------------------------------------------------------------------------------------------------------------------------------------------------------------------------------------------------------------------------------------------------------------------------------------------------------------------------------------------|---------------------------------------|
| 1<br>2<br>3<br>4<br>5<br>6                               | Cykert, S., P. Dilworth-Anderson, M. H. Monroe, P. Walker, F. R. McGuire, G. Corbie-Smith, L. J. Edwards, and A. J. Bunton. 2010. 'Factors associated with decisions to undergo surgery among patients with newly diagnosed early-stage lung cancer', <i>JAMA</i> , 303: 2368-76.                                                                                                                 | Population: Not multimorbid           |
| 7<br>8<br>9                                              | Damm, K., J. Volk, A. Horn, J. P. Allam, N. Troensegaard-Petersen, N. Serup-Hansen, T. Winkler, I. Thiessen, K. Borchert, E. G. Wustenberg, and T. Mittendorf. 2016. 'Patient preferences in allergy immunotherapy (AIT) in Germany - a discrete-choice-experiment', <i>Health Economics Review</i> , 6 (1) (no pagination).                                                                      | Population: Age <60 yrs.              |
| 10<br>11<br>12                                           | Danis, M., J. Garrett, R. Harris, and D. L. Patrick. 1994. 'STABILITY OF CHOICES ABOUT LIFE-SUSTAINING TREATMENTS', <i>Annals of Internal Medicine</i> , 120: 567-73.                                                                                                                                                                                                                             | Population: Not multimorbid           |
| 13<br>14<br>15                                           | Dattalo, M., C. E. Boulton, S. Wegener, E. Rand-Giovanetti, L. Reider, and K. Frey. 2010. 'Individual and contextual factors that influence multi-morbid older adults' participation in chronic disease self-management (CDSM) programs', <i>Journal of the American Geriatrics Society</i> , 1): S167.                                                                                           | Document type: Conference proceedings |
| 16<br>17<br>18<br>19                                     | Dattalo, M., E. R. Giovanetti, D. Scharfstein, C. Boulton, S. Wegener, J. L. Wolff, B. Leff, K. D. Frick, L. Reider, K. Frey, G. Noronha, and C. Boyd. 2012. 'Who participates in Chronic Disease Self-management (CDSM) programs? Differences between participants and nonparticipants in a population of multimorbid older adults', <i>Medical Care</i> , 50: 1071-75.                          | Outcome: Preferences not addressed    |
| 20<br>21<br>22<br>23                                     | Dattalo, M., K. Kennealy, E. Chapman, A. Gilmore-Bykovskyi, J. Loosen, E. Schmitz, M. F. Wyman, N. Rogus-Pulia, N. Werner, A. J. Kind, and B. Bowers. 2016. "'I'm not a textbook patient": How being listened to can affect health care trajectories for older adults with multiple chronic conditions and frequent hospitalizations', <i>Journal of General Internal Medicine</i> , 1): S85-S86. | Document type: Conference proceedings |
| 24<br>25<br>26                                           | Dautzenberg, P. L., P. D. Bezemer, S. A. Duursma, R. Schonwetter, and C. Hooyer. 1994. 'The frequency of "do-not-resuscitate" order in aged in-patients: effect of patient- and non-patient-related factors', <i>Netherlands Journal of Medicine</i> , 44: 78-83.                                                                                                                                 | Outcome: Preferences not addressed    |
| 27<br>28                                                 | Dautzenberg, P. L., S. A. Duursma, P. D. Bezemer, C. Van Engen, R. S. Schonwetter, and C. Hooyer. 1993. 'Resuscitation decisions on a Dutch geriatric ward', <i>Quarterly Journal of Medicine</i> , 86: 535-42.                                                                                                                                                                                   | Outcome: Preferences not addressed    |
| 29<br>30<br>31<br>32                                     | Davison, Sara N., Seija K. Kromm, and Gillian R. Currie. 2010. 'Patient and health professional preferences for organ allocation and procurement, end-of-life care and organization of care for patients with chronic kidney disease using a discrete choice experiment', <i>Nephrology Dialysis Transplantation</i> , 25: 2334-41.                                                               | Population: Age <60 yrs.              |
| 33<br>34<br>35<br>36                                     | De Celis, E. S. P., E. Baltazar-Avalos, L. A. Guadalupe Rocha-Rojo, P. Rojo-Castillo, and Y. C. Guerra. 2016. 'Health information seeking preferences of Mexican cancer survivors: Creating an evidence base for the design of high-quality communication programs', <i>Journal of Clinical Oncology</i> . Conference: ASCO's Quality Care Symposium, 34.                                         | Document type: Conference proceedings |
| 37<br>38<br>39<br>40<br>41<br>42<br>43<br>44<br>45<br>46 | de Decker, L., C. Annweiler, C. Launay, B. Fantino, and O. Beauchet. 2014. 'Do not resuscitate orders and aging: impact of multimorbidity on the decision-making process', <i>Journal of Nutrition, Health &amp; Aging</i> , 18: 330-5.                                                                                                                                                           | Document type: Editorials & reviews   |

|                                                                                                                                                                                                                                                                                                                                                                                                                                         |                                                    |
|-----------------------------------------------------------------------------------------------------------------------------------------------------------------------------------------------------------------------------------------------------------------------------------------------------------------------------------------------------------------------------------------------------------------------------------------|----------------------------------------------------|
| de Vos, R., R. W. Koster, and R. J. de Haan. 1998. 'Impact of survival probability, life expectancy, quality of life and patient preferences on do-not-attempt-resuscitation orders in a hospital. Resuscitation Committee', <i>Resuscitation</i> , 39: 15-21.                                                                                                                                                                          | Population: Age <60 yrs.                           |
| De Vos, R., W. Koster R, and R. J. De Haan. 1998. 'Impact of survival probability, life expectancy, quality of life and patient preferences on do-not-attempt-resuscitation orders in a hospital', <i>Resuscitation</i> , 39: 15-21.                                                                                                                                                                                                    | Duplicates                                         |
| Degner, L. F., and J. A. Sloan. 1992. 'DECISION-MAKING DURING SERIOUS ILLNESS - WHAT ROLE DO PATIENTS REALLY WANT TO PLAY', <i>Journal of Clinical Epidemiology</i> , 45: 941-50.                                                                                                                                                                                                                                                       | Population: Age <60 yrs.                           |
| Desbiens, N. A., A. W. Wu, S. K. Broste, N. S. Wenger, A. F. Connors, Jr., J. Lynn, Y. Yasui, R. S. Phillips, and W. Fulkerson. 1996. 'Pain and satisfaction with pain control in seriously ill hospitalized adults: findings from the SUPPORT research investigations. For the SUPPORT investigators. Study to Understand Prognoses and Preferences for Outcomes and Risks of Treatment', <i>Critical Care Medicine</i> , 24: 1953-61. | Outcome: Preferences not addressed                 |
| Deschler, B., T. de Witte, R. Mertelsmann, and M. Lubbert. 2006. 'Treatment decision-making for older patients with high-risk myelodysplastic syndrome or acute myeloid leukemia: problems and approaches', <i>Haematologica</i> , 91: 1513-22.                                                                                                                                                                                         | Outcome: Preferences from physicians or caregivers |
| Dev, S., R. M. Clare, G. M. Felker, M. Fiuzat, L. Warner Stevenson, and C. M. O'Connor. 2012. 'Link between decisions regarding resuscitation and preferences for quality over length of life with heart failure', <i>European Journal of Heart Failure</i> , 14: 45-53.                                                                                                                                                                | Population: Age <60 yrs.                           |
| Dierckx, K., M. Deveugele, P. Roosen, and I. Devisch. 2013. 'Implementation of shared decision making in physical therapy: observed level of involvement and patient preference', <i>Phys Ther</i> , 93: 1321-30.                                                                                                                                                                                                                       | Population: Age <60 yrs.                           |
| Dima, A., G. T. Lewith, P. Little, R. Moss-Morris, N. E. Foster, and F. L. Bishop. 2013. 'Identifying patients' beliefs about treatments for chronic low back pain in primary care: a focus group study', <i>British Journal of General Practice</i> , 63: e490-8.                                                                                                                                                                      | Population: Not multimorbid                        |
| Dinsmore, J., C. Hannigan, E. Murphy, J. Kuiper, A. Jacobs, S. Smith, and J. Doyle. 2017. 'The impact of carer 'shared (disease management) responsibility' on 'shared decision making' for older persons managing multimorbidity', <i>European Journal of Neurology</i> , 24 (Supplement 1): 763.                                                                                                                                      | Document type: Conference proceedings              |
| Ditto, Peter H., Jill A. Jacobson, William D. Smucker, Joseph H. Danks, and Angela Fagerlin. 2006. 'Context changes choices: A prospective study of the effects of hospitalization on life-sustaining treatment preferences', <i>Medical Decision Making</i> , 26: 313-22.                                                                                                                                                              | Population: Not multimorbid                        |
| Donyai, P., R. Snell, and T. Langran. 2017. 'An evaluation of patient satisfaction with a polypharmacy medication review service conducted by pharmacists in GP practices', <i>International Journal of Pharmacy Practice</i> , 25 (Supplement 1): 45.                                                                                                                                                                                  | Document type: Conference proceedings              |
| Downar, J., T. Luk, R. W. Sibbald, T. Santini, J. Mikhael, H. Berman, and L. Hawryluck. 2011. 'Why do patients agree to a "Do not resuscitate" or "Full code" order? Perspectives of medical inpatients', <i>Journal of General Internal Medicine</i> , 26: 582-7.                                                                                                                                                                      | Population: Not multimorbid                        |
| Drks, and Familien-und Präventivmedizin Paracelsus Medizinische Privatuniversität Institut für Allgemein. 2017. "Pilot-testing of a simple Prioritization-table for managing polypharmacy in Primary Care Patients." In.                                                                                                                                                                                                                | Outcome: Preferences not addressed                 |

|                                                                                                                                                                                                                                                                                                                                                                               |                                                    |
|-------------------------------------------------------------------------------------------------------------------------------------------------------------------------------------------------------------------------------------------------------------------------------------------------------------------------------------------------------------------------------|----------------------------------------------------|
| Drks, and Rehabilitationsforschung Sektion Versorgungsforschung und. 2018. "Availability and Quality of Assessment Instruments on Patient-Centeredness in the Multimorbid Elderly." In.                                                                                                                                                                                       | Outcome: Preferences not addressed                 |
| Ekdahl, A. W., I. Hellstrom, L. Andersson, and M. Friedrichsen. 2012. 'Too complex and time-consuming to fit in! Physicians' experiences of elderly patients and their participation in medical decision making: a grounded theory study', <i>BMJ Open</i> , 2: 7.                                                                                                            | Outcome: Preferences from physicians or caregivers |
| Ekerstad, N., R. Lofmark, D. Andersson, and P. Carlsson. 2011. 'A tentative consensus-based model for priority setting: an example from elderly patients with myocardial infarction and multi-morbidity', <i>Scandinavian journal of public health</i> , 39: 345-53.                                                                                                          | Outcome: Preferences from physicians or caregivers |
| Ernst, J., S. Berger, G. Weißflog, C. Schröder, A. Körner, D. Niederwieser, E. Brähler, and S. Singer. 2013. 'Patient participation in the medical decision-making process in haemato-oncology—A qualitative study', <i>European Journal of Cancer Care</i> , 22: 684-90.                                                                                                     | Population: Age <60 yrs.                           |
| Evans, K. E., T. Kalsi, G. Babic-Illman, and D. Harari. 2014. 'Comorbidities and patient choice are poorly documented in older people undergoing treatment for cancer', <i>European Geriatric Medicine</i> , 1): S143.                                                                                                                                                        | Outcome: Preferences not addressed                 |
| Falun, N., B. Fridlund, M. A. Schaufel, E. Schei, and T. M. Norekval. 2016. 'Patients' goals, resources, and barriers to future change: A qualitative study of patient reflections at hospital discharge after myocardial infarction', <i>European Journal of Cardiovascular Nursing</i> , 15: 495-503.                                                                       | Population: Not multimorbid                        |
| Farin, E., L. Gramm, and E. Schmidt. 2013. 'The patient-physician relationship in patients with chronic low back pain as a predictor of outcomes after rehabilitation', <i>Journal of Behavioral Medicine</i> , 36: 246-58.                                                                                                                                                   | Population: Age <60 yrs.                           |
| Farin, E., L. Gramm, and E. Schmidt. 2013. 'The patient-physician relationship in patients with chronic low back pain as a predictor of outcomes after rehabilitation', <i>Journal of Behavioral Medicine</i> , 36: 246-58.                                                                                                                                                   | Outcome: Preferences not addressed                 |
| Fausser, Michael C. 1999. 'Hospice patient perspectives regarding the implementation of advanced directives', 60: 0410-10.                                                                                                                                                                                                                                                    | Outcome: Preferences not addressed                 |
| Federman, A. D., A. Sanchez-Munoz, L. Jandorf, C. Salmon, M. S. Wolf, and J. Kannry. 2017. 'Patient and clinician perspectives on the outpatient after-visit summary: a qualitative study to inform improvements in visit summary design', <i>Journal of the American Medical Informatics Association : JAMIA</i> , 24: e61-e68.                                              | Population: Not multimorbid                        |
| Fernstrom, K. M., N. D. Shippee, A. L. Jones, and H. R. Britt. 2016. 'Development and validation of a new patient experience tool in patients with serious illness', <i>BMC Palliative Care</i> , 15: 99.                                                                                                                                                                     | Outcome: Preferences not addressed                 |
| Ferris, R., C. Blaum, E. Kiwak, J. Austin, J. Esterson, G. Harkless, G. Oftedahl, M. Parchman, P. H. Van Ness, and M. E. Tinetti. 2017. 'Perspectives of Patients, Clinicians, and Health System Leaders on Changes Needed to Improve the Health Care and Outcomes of Older Adults With Multiple Chronic Conditions', <i>Journal of Aging &amp; Health</i> : 898264317691166. | Outcome: Preferences not addressed                 |
| Filardo, G., A. Roffi, G. Merli, T. Marcacci, F. B. Ceroni, D. Raboni, E. Kon, and M. Marcacci. 2017. 'Patients control preferences and results in knee arthroplasty', <i>Knee Surgery Sports Traumatology Arthroscopy</i> , 25: 552-58.                                                                                                                                      | Population: Not multimorbid                        |



|    |                                                                                                                                                                                                                                                                                                                                              |                                                    |
|----|----------------------------------------------------------------------------------------------------------------------------------------------------------------------------------------------------------------------------------------------------------------------------------------------------------------------------------------------|----------------------------------------------------|
| 1  |                                                                                                                                                                                                                                                                                                                                              |                                                    |
| 2  |                                                                                                                                                                                                                                                                                                                                              |                                                    |
| 3  |                                                                                                                                                                                                                                                                                                                                              |                                                    |
| 4  | Finkelstein, E., C. Malhotra, J. Chay, S. Ozdemir, A. Chopra, and R. Kanesvaran. 2016. 'Impact of Treatment Subsidies and Cash Payouts on Treatment Choices at the End of Life', <i>Value in Health</i> , 19: 788-94.                                                                                                                        | Population: Age <60 yrs.                           |
| 5  |                                                                                                                                                                                                                                                                                                                                              |                                                    |
| 6  | Finney Rutten, L. J., B. W. Hesse, J. L. St. Sauver, P. Wilson, N. Chawla, D. B. Hartigan, R. P. Moser, S. Taplin, R. Glasgow, and N. K. Arora. 2016. 'Health Self-Efficacy Among Populations with Multiple Chronic Conditions: the Value of Patient-Centered Communication', <i>Advances in Therapy</i> , 33: 1440-51.                      | Outcome: Preferences not addressed                 |
| 7  |                                                                                                                                                                                                                                                                                                                                              |                                                    |
| 8  |                                                                                                                                                                                                                                                                                                                                              |                                                    |
| 9  | Fischer, M., A. Visser, B. Voerman, B. Garssen, G. van Anandel, and J. Bensing. 2006. 'Treatment decision making in prostate cancer: Patients' participation in complex decisions', <i>Patient Education and Counseling</i> , 63: 308-13.                                                                                                    | Population: Not multimorbid                        |
| 10 |                                                                                                                                                                                                                                                                                                                                              |                                                    |
| 11 |                                                                                                                                                                                                                                                                                                                                              |                                                    |
| 12 | Fitch, M. 2017. 'Perspectives of older adults regarding decision-making about chemotherapy', <i>Psycho-Oncology</i> , 26 (Supplement 3): 102.                                                                                                                                                                                                | Document type: Conference proceedings              |
| 13 |                                                                                                                                                                                                                                                                                                                                              |                                                    |
| 14 | Florin, Jan, Anna Ehrenberg, and Margareta Ehnfors. 2006. 'Patient participation in clinical decision-making in nursing: A comparative study of nurses' and patients' perceptions', <i>Journal of Clinical Nursing</i> , 15: 1498-508.                                                                                                       | Population: Age <60 yrs.                           |
| 15 |                                                                                                                                                                                                                                                                                                                                              |                                                    |
| 16 |                                                                                                                                                                                                                                                                                                                                              |                                                    |
| 17 | Florin, Jan, Anna Ehrenberg, and Margareta Ehnfors. 2006. 'Patient participation in clinical decision-making in nursing: A comparative study of nurses' and patients' perceptions', <i>Journal of Clinical Nursing</i> , 15: 1498-508.                                                                                                       | Population: Not multimorbid                        |
| 18 |                                                                                                                                                                                                                                                                                                                                              |                                                    |
| 19 |                                                                                                                                                                                                                                                                                                                                              |                                                    |
| 20 | Fortin, M., C. Hudon, F. Gallagher, A. L. Ntetu, D. Maltais, and H. Soubhi. 2010. 'Nurses joining family doctors in primary care practices: perceptions of patients with multimorbidity', <i>BMC Family Practice</i> , 11: 84.                                                                                                               | Outcome: Preferences not addressed                 |
| 21 |                                                                                                                                                                                                                                                                                                                                              |                                                    |
| 22 |                                                                                                                                                                                                                                                                                                                                              |                                                    |
| 23 | Fradgley, E. A., C. L. Paul, J. Bryant, I. A. Roos, F. A. Henskens, and D. J. Paul. 2014. 'Consumer participation in quality improvements for chronic disease care: development and evaluation of an interactive patient-centered survey to identify preferred service initiatives', <i>Journal of medical Internet research</i> , 16: e292. | Population: Age <60 yrs.                           |
| 24 |                                                                                                                                                                                                                                                                                                                                              |                                                    |
| 25 |                                                                                                                                                                                                                                                                                                                                              |                                                    |
| 26 | Fraenkel, L., D. R. Wittink, J. Concato, and T. Fried. 2004. 'Are preferences for cyclooxygenase-2 inhibitors influenced by the certainty effect?', <i>Journal of Rheumatology</i> , 31: 591-93.                                                                                                                                             | Population: Not multimorbid                        |
| 27 |                                                                                                                                                                                                                                                                                                                                              |                                                    |
| 28 |                                                                                                                                                                                                                                                                                                                                              |                                                    |
| 29 | Fraenkel, L., S. T. Bogardus, J. Concato, and D. R. Wittink. 2004. 'Treatment options in knee osteoarthritis - The patient's perspective', <i>Archives of Internal Medicine</i> , 164: 1299-304.                                                                                                                                             | Population: Not multimorbid                        |
| 30 |                                                                                                                                                                                                                                                                                                                                              |                                                    |
| 31 |                                                                                                                                                                                                                                                                                                                                              |                                                    |
| 32 | Fraenkel, Liana, Barbara Gulanski, and Dick R. Wittink. 2006. 'Preference for hip protectors among older adults at high risk for osteoporotic fractures', <i>Journal of Rheumatology</i> , 33: 2064-68.                                                                                                                                      | Population: Not multimorbid                        |
| 33 |                                                                                                                                                                                                                                                                                                                                              |                                                    |
| 34 |                                                                                                                                                                                                                                                                                                                                              |                                                    |
| 35 | Franco, M. R., K. Howard, C. Sherrington, P. H. Ferreira, J. Rose, J. L. Gomes, and M. L. Ferreira. 2015. 'Eliciting older people's preferences for exercise programs: a best-worst scaling choice experiment', <i>Journal of Physiotherapy</i> , 61: 34-41.                                                                                 | Population: Not multimorbid                        |
| 36 |                                                                                                                                                                                                                                                                                                                                              |                                                    |
| 37 |                                                                                                                                                                                                                                                                                                                                              |                                                    |
| 38 | Fried, T. R., M. E. Tinetti, and L. Iannone. 2011. 'Primary care clinicians' experiences with treatment decision making for older persons with multiple conditions', <i>Archives of Internal Medicine</i> , 171: 75-80.                                                                                                                      | Outcome: Preferences from physicians or caregivers |
| 39 |                                                                                                                                                                                                                                                                                                                                              |                                                    |
| 40 |                                                                                                                                                                                                                                                                                                                                              |                                                    |
| 41 |                                                                                                                                                                                                                                                                                                                                              |                                                    |
| 42 |                                                                                                                                                                                                                                                                                                                                              |                                                    |
| 43 |                                                                                                                                                                                                                                                                                                                                              |                                                    |
| 44 |                                                                                                                                                                                                                                                                                                                                              |                                                    |
| 45 |                                                                                                                                                                                                                                                                                                                                              |                                                    |
| 46 |                                                                                                                                                                                                                                                                                                                                              |                                                    |

|                       |                                                                                                                                                                                                                                                                                                                                       |                                       |
|-----------------------|---------------------------------------------------------------------------------------------------------------------------------------------------------------------------------------------------------------------------------------------------------------------------------------------------------------------------------------|---------------------------------------|
| 1<br>2<br>3<br>4<br>5 | Frost, D. W., D. J. Cook, D. K. Heyland, and R. A. Fowler. 2011. 'Patient and healthcare professional factors influencing end-of-life decision-making during critical illness: A systematic review', <i>Critical Care Medicine</i> , 39: 1174-89.                                                                                     | Outcome: Preferences not addressed    |
| 6<br>7<br>8           | Fuller, L. M., B. Button, B. Tarrant, C. R. Battistuzzo, M. Braithwaite, G. Snell, and A. E. Holland. 2014. 'Patients' expectations and experiences of rehabilitation following lung transplantation', <i>Clinical Transplantation</i> , 28: 252-8.                                                                                   | Population: Age <60 yrs.              |
| 9<br>10<br>11         | Fuller, R., N. Dudley, and J. Blacktop. 2004. 'Avoidance hierarchies and preferences for anticoagulation-semi-qualitative analysis of older patients' views about stroke prevention and the use of warfarin', <i>Age and Ageing</i> , 33: 608-11.                                                                                     | Population: Not multimorbid           |
| 12<br>13<br>14        | Fuller, S. M., K. A. Koester, R. R. Guinness, and W. T. Steward. 2017. 'Patients' Perceptions and Experiences of Shared Decision-Making in Primary HIV Care Clinics', <i>The Journal of the Association of Nurses in AIDS Care: JANAC</i> , 28: 75-84.                                                                                | Population: Age <60 yrs.              |
| 15<br>16<br>17        | Fung, C. H., C. M. Setodji, F. Y. Kung, J. Keeseey, S. M. Asch, J. Adams, and E. A. McGlynn. 2008. 'The relationship between multimorbidity and patients' ratings of communication', <i>J Gen Intern Med</i> , 23: 788-93.                                                                                                            | Population: Age <60 yrs.              |
| 18<br>19<br>20        | Furber, L., S. Bonas, G. Murtagh, and A. Thomas. 2015. 'Patients' experiences of an initial consultation in oncology: knowing and not knowing', <i>British journal of health psychology</i> , 20: 261-73.                                                                                                                             | Population: Age <60 yrs.              |
| 21<br>22<br>23        | Gainer, R. A., J. Curran, K. J. Buth, J. G. David, J. F. Legare, and G. M. Hirsch. 2017. 'Toward Optimal Decision Making among Vulnerable Patients Referred for Cardiac Surgery: A Qualitative Analysis of Patient and Provider Perspectives', <i>Medical Decision Making</i> , 37: 600-10.                                           | Population: Not multimorbid           |
| 24<br>25<br>26        | Gainer, R., J. Begum, E. Wilson-Pease, and G. Hirsch. 2016. 'A formalized shared decision making process with individualized decision aids improves comprehension and decisional quality among frail, elderly cardiac surgery patients', <i>Canadian Journal of Cardiology</i> , 32 (10 Supplement 1): S266-S67.                      | Population: Age <60 yrs.              |
| 27<br>28<br>29        | Gallacher, K., C. R. May, V. M. Montori, and F. S. Mair. 2011. 'Understanding patients' experiences of treatment burden in chronic heart failure using normalization process theory', <i>Ann Fam Med</i> , 9: 235-43.                                                                                                                 | Outcome: Preferences not addressed    |
| 30<br>31<br>32        | Gallagher, J. J., C. C. Lewis, A. Ruane, R. Buckmaster, F. Doyle, S. Sears, T. Morgan, N. Pender, R. G. Sheahan, and B. McAdam. 2015. 'Targeting device acceptance in patients with an ICD: The role of insomnia, PTSD and patients' support preferences', <i>European Journal of Heart Failure</i> , 1): 428.                        | Document type: Conference proceedings |
| 33<br>34<br>35        | Garrett, J. M., R. P. Harris, J. K. Norburn, D. L. Patrick, and M. Danis. 1993. 'LIFE-SUSTAINING TREATMENTS DURING TERMINAL ILLNESS - WHO WANTS WHAT', <i>Journal of General Internal Medicine</i> , 8: 361-68.                                                                                                                       | Population: Not multimorbid           |
| 36<br>37<br>38        | Garrido, M. M., S. T. Harrington, and H. G. Prigerson. 2014. 'End-of-Life Treatment Preferences: A Key to Reducing Ethnic/Racial Disparities in Advance Care Planning?', <i>Cancer</i> , 120: 3981-86.                                                                                                                                | Population: Age <60 yrs.              |
| 39<br>40<br>41        | Gazzard, B., S. Ali, A. Muhlbacher, N. Ghafouri, F. Maggiolo, C. Golics, S. Nozza, M. J. Fuster, A. Antela, J. J. Parienti, N. Dang, S. R. Bregigeon, A. Benzie, and M. Murray. 2014. 'Patient preferences for characteristics of antiretroviral therapies: results from five European countries', <i>J Int AIDS Soc</i> , 17: 19540. | Population: Age <60 yrs.              |

|                                  |                                                                                                                                                                                                                                                                                                                  |                                       |
|----------------------------------|------------------------------------------------------------------------------------------------------------------------------------------------------------------------------------------------------------------------------------------------------------------------------------------------------------------|---------------------------------------|
| 1<br>2<br>3<br>4<br>5<br>6       | Geok Ling, Lee, Teo Irene, and Ravindran Kanesvaran. 2018. 'The Complexities of Doctor-Patient-Family Communication in an Asian Oncology Setting: Concordance and Discordance Among Patient Preferences, Family Preferences, and Perceived and Actual Communication', <i>Health Communication</i> , 33: 95-101.  | Population: Not multimorbid           |
| 7<br>8<br>9                      | Gill, S. D., T. Dunning, F. McKinnon, D. Cook, and J. Bourke. 2014. 'Understanding the experience of inpatient rehabilitation: insights into patient-centred care from patients and family members', <i>Scandinavian Journal of Caring Sciences</i> , 28: 264-72.                                                | Outcome: Preferences not addressed    |
| 10<br>11                         | Gillick, M., S. Berkman, and L. Cullen. 1999. 'A patient-centered approach to advance medical planning in the nursing home', <i>Journal of the American Geriatrics Society</i> , 47: 227-30.                                                                                                                     | Population: Not multimorbid           |
| 12<br>13<br>14                   | Gjerset, G. M., S. D. Fossa, K. S. Courneya, E. Skovlund, A. B. Jacobsen, and L. Thorsen. 2011. 'Interest and preferences for exercise counselling and programming among Norwegian cancer survivors', <i>European Journal of Cancer Care</i> , 20: 96-105.                                                       | Population: Age <60 yrs.              |
| 15<br>16<br>17                   | Glynn, L. G., A. MacFarlane, and A. W. Murphy. 2007. 'The complexity of patients' satisfaction with out-of-hours care: a qualitative study', <i>European Journal of General Practice</i> , 13: 83-8.                                                                                                             | Population: Age <60 yrs.              |
| 18<br>19                         | Gordon, E. J. 2001. 'Patients' decisions for treatment of end-stage renal disease and their implications for access to transplantation', <i>Social Science &amp; Medicine</i> , 53: 971-87.                                                                                                                      | Population: Age <60 yrs.              |
| 20<br>21<br>22                   | Gordon, Janet, Kenneth Rockwood, and Colin Powell. 2000. 'Assessing patients' views of clinical changes', <i>JAMA: Journal of the American Medical Association</i> , 283: 1824-25.                                                                                                                               | Document type: Editorials & reviews   |
| 23<br>24<br>25                   | Grace, S. L., J. McDonald, D. Fishman, and V. Caruso. 2005. 'Patient preferences for home-based versus hospital-based cardiac rehabilitation', <i>Journal of Cardiopulmonary Rehabilitation</i> , 25: 24-29.                                                                                                     | Population: Not multimorbid           |
| 26<br>27                         | Granas, A. G., and I. Bates. 2005. 'Patients' understanding and management of their illnesses and prescribed medicines--a descriptive study', <i>Pharmacy World &amp; Science</i> , 27: 321-8.                                                                                                                   | Outcome: Preferences not addressed    |
| 28<br>29<br>30                   | Greenhalgh, T., J. Wherton, P. Sugarhood, S. Hinder, R. Procter, and R. Stones. 2013. 'What matters to older people with assisted living needs? A phenomenological analysis of the use and non-use of telehealth and telecare', <i>Social Science &amp; Medicine</i> , 93: 86-94.                                | Outcome: Preferences not addressed    |
| 31<br>32                         | Grudniewicz, A., M. Nelson, K. Kuluski, V. Lui, H. V. Cunningham, J. X. Nie, H. Colquhoun, W. P. Wodchis, S. Taylor, M. Loganathan, and R. E. Upshur. 2016. 'Treatment goal setting for complex patients: Protocol for a scoping review', <i>BMJ Open</i> , 6 (5) (no pagination).                               | Document type: Study protocols        |
| 33<br>34<br>35<br>36             | Grudzen, C., S. Stone, S. Mohanty, K. A. Lorenz, J. Torres, J. Ortiz, and S. Timmermans. 2011. '"I want to be taking my own last breath": Patients' reflections on illness when presenting to an emergency department at the end of life (723)', <i>Journal of Pain and Symptom Management</i> , 41 (1): 285-86. | Document type: Conference proceedings |
| 37<br>38<br>39<br>40<br>41<br>42 | Grundberg, A., B. Ebbeskog, S. A. Gustafsson, and D. Religa. 2014. 'Mental health-promoting dialogues from the perspective of community-dwelling seniors with multimorbidity', <i>J Multidiscip Healthc</i> , 7: 189-99.                                                                                         | Outcome: Preferences not addressed    |

|                       |                                                                                                                                                                                                                                                                                                                                            |                                                    |
|-----------------------|--------------------------------------------------------------------------------------------------------------------------------------------------------------------------------------------------------------------------------------------------------------------------------------------------------------------------------------------|----------------------------------------------------|
| 1<br>2<br>3<br>4<br>5 | Gunturi, N. 2018. 'Patient-centered goals of care: Using the Chronic Care Management (CCM) code towards cooperative goal setting in the multimorbid elderly', <i>Journal of the American Medical Directors Association</i> , 19 (3): B20.                                                                                                  | Document type: Conference proceedings              |
| 6<br>7<br>8           | Hackshaw, M. D., M. Holmes, M. Lankford, M. Thomas, A. Ogbonnaya, and M. Eaddy. 2016. 'Prescribing Preferences in the First-Line Treatment for Patients With Metastatic Renal Cell Carcinoma in the United States', <i>Clinical Genitourinary Cancer</i> , 14: e479-e87.                                                                   | Outcome: Preferences from physicians or caregivers |
| 9<br>10               | Hall, A. M., P. H. Ferreira, C. G. Maher, J. Latimer, and M. L. Ferreira. 2010. 'The influence of the therapist-patient relationship on treatment outcome in physical rehabilitation: a systematic review', <i>Physical Therapy</i> , 90: 1099-110.                                                                                        | Population: Age <60 yrs.                           |
| 11<br>12<br>13        | Hamann, J., B. Neuner, J. Kasper, A. Vodermaier, A. Loh, A. Deinzer, C. Heesen, W. Kissling, R. Busch, R. Schmieder, C. Spies, C. Caspari, and M. Harter. 2007. 'Participation preferences of patients with acute and chronic conditions', <i>Health Expectations</i> , 10: 358-63.                                                        | Population: Age <60 yrs.                           |
| 14<br>15<br>16<br>17  | Hamel, M. B., J. Lynn, J. M. Teno, K. E. Covinsky, A. W. Wu, A. Galanos, N. A. Desbiens, and R. S. Phillips. 2000. 'Age-related differences in care preferences, treatment decisions, and clinical outcomes of seriously ill hospitalized adults: Lessons from SUPPORT', <i>Journal of the American Geriatrics Society</i> , 48: S176-S82. | Document type: Conference proceedings              |
| 18<br>19<br>20        | Hamelinck, V. C., E. Bastiaannet, A. H. Pieterse, C. J. H. van de Velde, G. J. Liefers, and A. M. Stiggelbout. 2018. 'Preferred and Perceived Participation of Younger and Older Patients in Decision Making About Treatment for Early Breast Cancer: A Prospective Study', <i>Clin Breast Cancer</i> , 18: e245-e53.                      | Population: Not multimorbid                        |
| 21<br>22<br>23        | Harder, H., R. Ballinger, C. Langridge, A. Ring, and L. J. Fallowfield. 2013. 'Adjuvant chemotherapy in elderly women with breast cancer: patients' perspectives on information giving and decision making', <i>Psycho-Oncology</i> , 22: 2729-35.                                                                                         | Population: Not multimorbid                        |
| 24<br>25<br>26        | Hauber, A. B., H. Nguyen, J. Posner, I. Kalsekar, and J. Ruggles. 2016. 'A discrete-choice experiment to quantify patient preferences for frequency of glucagon-like peptide-1 receptor agonist injections in the treatment of type 2 diabetes', <i>Current Medical Research &amp; Opinion</i> , 32: 251-62.                               | Population: Not multimorbid                        |
| 27<br>28<br>29        | Hawkins, M., S. D. Gill, R. Batterham, G. R. Elsworth, and R. H. Osborne. 2017. 'The Health Literacy Questionnaire (HLQ) at the patient-clinician interface: a qualitative study of what patients and clinicians mean by their HLQ scores', <i>BMC Health Services Research</i> , 17: 309.                                                 | Population: Age <60 yrs.                           |
| 30<br>31<br>32        | Hawkins, N. A., P. H. Ditto, J. H. Danks, and W. D. Smucker. 2005. 'Micromanaging death: Process preferences, values, and goals in end-of-life medical decision making', <i>Gerontologist</i> , 45: 107-17.                                                                                                                                | Population: Not multimorbid                        |
| 33<br>34<br>35        | Hawley, S. T., and R. Morrison. 2012. 'Achieving high-quality surgical treatment decisions: The perspective of older breast cancer patients', <i>Aging Health</i> , 8: 589-99.                                                                                                                                                             | Outcome: Preferences not addressed                 |
| 36<br>37              | Hayes, R. P., and J. T. Fitzgerald. 2009. 'Perceptions and attitudes are primary contributors to insulin delivery system satisfaction in people with type 2 diabetes', <i>Diabetes Technology and Therapeutics</i> , 11: 419-26.                                                                                                           | Population: Age <60 yrs.                           |
| 38<br>39<br>40        | Hedman M., U. Pöder, A.G. Mamhidir A.G., A. Nilsson, M.L. Kristofferzon and E. Häggström. Life memories and the ability to act: the meaning of autonomy and participation for older people when living with chronic illness. <i>Scand J Caring Sci</i> ; 2015; 29; 824–833                                                                 | Population: Not multimorbid                        |

1  
2  
3  
4  
5  
6  
7  
8  
9  
10  
11  
12  
13  
14  
15  
16  
17  
18  
19  
20  
21  
22  
23  
24  
25  
26  
27  
28  
29  
30  
31  
32  
33  
34  
35  
36  
37  
38  
39  
40  
41  
42  
43  
44  
45  
46

|                            |                                                                                                                                                                                                                                                                                                                                                                                                                                                               |                                     |
|----------------------------|---------------------------------------------------------------------------------------------------------------------------------------------------------------------------------------------------------------------------------------------------------------------------------------------------------------------------------------------------------------------------------------------------------------------------------------------------------------|-------------------------------------|
| 1<br>2<br>3<br>4<br>5      | Heid, A. R., R. Pruchno, and M. Wilson-Genderson. 2018. 'Illness Representations of Multiple Chronic Conditions and Self-Management Behaviors in Older Adults: A Pilot Study', <i>International Journal of Aging &amp; Human Development</i> , 87: 90-106.                                                                                                                                                                                                    | Outcome: Preferences not addressed  |
| 6<br>7                     | Heisler, M. 2017. 'Eliciting Personal Values of Patients with Multiple Chronic Conditions: Why and How', <i>Journal of General Internal Medicine</i> , 32: 1273-74.                                                                                                                                                                                                                                                                                           | Document type: Editorials & reviews |
| 8<br>9<br>10<br>11         | Herber, Oliver Rudolf, Bettina Bücken, Maria-Inti Metzendorf, and Julie Barroso. 2017. 'A qualitative meta-summary using Sandelowski and Barroso's method for integrating qualitative research to explore barriers and facilitators to self-care in heart failure patients', <i>European Journal of Cardiovascular Nursing</i> , 16: 662-77.                                                                                                                  | Document type: Editorials & reviews |
| 12<br>13<br>14             | Hershkovitz, A., B. M. Rothschild, J. H. Rose, T. Hornick, and E. E. O'Toole. 2001. 'Medical care perceptions in elderly patients with musculoskeletal complaints', <i>Israel Medical Association Journal</i> , 3: 822-27.                                                                                                                                                                                                                                    | Outcome: Preferences not addressed  |
| 15<br>16<br>17             | Hjelm, M., G. Holst, A. Willman, D. Bohman, and J. Kristensson. 2015. 'The work of case managers as experienced by older persons (75+) with multi-morbidity - a focused ethnography', <i>BMC Geriatrics</i> , 15: 168.                                                                                                                                                                                                                                        | Outcome: Preferences not addressed  |
| 18<br>19<br>20             | Hofman, C. S., P. Makai, H. Boter, B. M. Buurman, A. J. de Craen, M. G. M. Rikkert, R. Donders, and R. J. F. Melis. 2015. 'The influence of age on health valuations: the older olds prefer functional independence while the younger olds prefer less morbidity', <i>Clinical Interventions In Aging</i> , 10: 9.                                                                                                                                            | Population: Not multimorbid         |
| 21<br>22<br>23             | Hogden, A., D. Greenfield, P. Nugus, and M. C. Kiernan. 2015. 'Development of a model to guide decision making in amyotrophic lateral sclerosis multidisciplinary care', <i>Health expectations: an international journal of public participation in health care and health policy</i> , 18: 1769-82.                                                                                                                                                         | Population: Not multimorbid         |
| 24<br>25<br>26             | Holmes, E., P. Crome, and A. Arora. 2018. 'Patients' preferences and existential perspective: what to consider and how should patient's expectations be guided?', <i>Aging Clinical and Experimental Research</i> , 30: 271-75.                                                                                                                                                                                                                               | Document type: Editorials & reviews |
| 27                         | Holmes, H. M., and A. Todd. 2017. 'The Role of Patient Preferences in Deprescribing', <i>Clinics in Geriatric Medicine</i> , 33: 165-75.                                                                                                                                                                                                                                                                                                                      | Document type: Editorials & reviews |
| 28<br>29<br>30             | Hope, K., M. Ferguson, D. P. Reidlinger, and E. Agarwal. 2017. "'I don't eat when I'm sick": Older people's food and mealtime experiences in hospital', <i>Maturitas</i> , 97: 6-13.                                                                                                                                                                                                                                                                          | Population: Not multimorbid         |
| 31<br>32                   | Hopp, F. P., N. Thornton, L. Martin, and R. Zalenski. 2012. 'Life disruption, life continuation: contrasting themes in the lives of African-American elders with advanced heart failure', <i>Soc Work Health Care</i> , 51: 149-72.                                                                                                                                                                                                                           | Outcome: Preferences not addressed  |
| 33<br>34<br>35             | Hopton, A., J. Eldred, and H. MacPherson. 2014. 'Patients' experiences of acupuncture and counselling for depression and comorbid pain: a qualitative study nested within a randomised controlled trial', <i>BMJ Open</i> , 4: e005144.                                                                                                                                                                                                                       | Population: Age <60 yrs.            |
| 36<br>37<br>38<br>39<br>40 | Hsu, Tina, Matthew Loscalzo, Rupal Ramani, Stephen Forman, Leslie Popplewell, Karen Clark, Vani Katheria, R. E. X. Strowbridge, Redmond Rinehart, D. A. N. Smith, Keith Matthews, Jeff Dillehunt, Feng Tao, David Smith, Canlan Sun, and Arti Hurria. 2017. 'Are Disagreements in Caregiver and Patient Assessment of Patient Health Associated with Increased Caregiver Burden in Caregivers of Older Adults with Cancer?', <i>Oncologist</i> , 22: 1383-91. | Outcome: Preferences not addressed  |

|                                                                                                                                                                                                                                                                                                                         |                                       |
|-------------------------------------------------------------------------------------------------------------------------------------------------------------------------------------------------------------------------------------------------------------------------------------------------------------------------|---------------------------------------|
| Huang, S. H. 2013. 'Challenges in managing elderly cancer patients: A systematic review', <i>Journal of Medical Imaging and Radiation Sciences</i> , 44 (1): 50.                                                                                                                                                        | Outcome: Preferences not addressed    |
| Hullfish, K. L., V. E. Bovbjerg, and W. D. Steers. 2004. 'Patient-centered goals for pelvic floor dysfunction surgery: Long-term follow-up', <i>American Journal of Obstetrics and Gynecology</i> , 191: 201-05.                                                                                                        | Population: Not multimorbid           |
| Hurwitz, L. M., J. Cullen, S. Elsamanoudi, D. J. Kim, J. Hudak, M. Colston, J. Travis, H. C. Kuo, C. R. Porter, and I. L. Rosner. 2016. 'A prospective cohort study of treatment decision-making for prostate cancer following participation in a multidisciplinary clinic', <i>Urologic Oncology</i> , 34: 233.e17-25. | Population: Not multimorbid           |
| Husain, L. S., K. Collins, M. Reed, and L. Wyld. 2008. 'Choices in cancer treatment: a qualitative study of the older women's (>70 years) perspective', <i>Psycho-Oncology</i> , 17: 410-6.                                                                                                                             | Population: Not multimorbid           |
| Ickowicz, E. 2012. 'Patient-centered care for older adults with multiple chronic conditions: A stepwise approach from the American Geriatrics Society: American Geriatrics Society expert panel on the care of older adults with multimorbidity', <i>Journal of the American Geriatrics Society</i> , 60: 1957-68.      | Document type: Editorials & reviews   |
| Isaacs, C. G., C. Kistler, K. M. Hunold, G. F. Pereira, M. Buchbinder, M. A. Weaver, S. A. McLean, and T. F. Platts-Mills. 2013. 'Shared decision-making in the selection of outpatient analgesics for older individuals in the emergency department', <i>Journal of the American Geriatrics Society</i> , 61: 793-98.  | Outcome: Preferences not addressed    |
| Isacson, D., K. Bingefors, and M. Lindberg. 2004. 'Self-reported Dermatological Problems and Preferences for Health: An Epidemiological Survey', <i>Acta Dermato-Venereologica</i> , 84: 27-31.                                                                                                                         | Population: Age <60 yrs.              |
| Itaya, T., Y. Murakami, A. Ota, E. Nomura, T. Fukushima, and M. Nishigaki. 2018. 'Factors influencing home discharge preference of inpatients with acute cerebral infarction: A retrospective cohort study', <i>Stroke</i> . Conference: American Heart Association/American Stroke Association, 49.                    | Document type: Conference proceedings |
| Iturria Sierra, J. A., and S. Marquez Calderon. 1997. '[Health and social services: needs, preferences and their use by the elderly following hospitalization]', <i>Revista Espanola de Salud Publica</i> , 71: 281-91.                                                                                                 | Population: Not multimorbid           |
| Jacobson, Kristin K. 2014. 'The older adult's experience of treatment and communication with primary care physicians in the medical encounter', 75.                                                                                                                                                                     | Outcome: Preferences not addressed    |
| Jansen, J., J. van Weert, S. van Dulmen, T. Heeren, and J. Bensing. 2007. 'Patient education about treatment in cancer care: an overview of the literature on older patients' needs', <i>Cancer Nursing</i> , 30: 251-60.                                                                                               | Population: Not multimorbid           |
| Jansons, P. S., L. Robins, T. P. Haines, and L. O'Brien. 2018. 'Barriers and enablers to ongoing exercise for people with chronic health conditions: Participants' perspectives following a randomized controlled trial of two interventions', <i>Archives of Gerontology and Geriatrics</i> , 76: 92-99.               | Outcome: Preferences not addressed    |
| Janssen, D. J. A., J. R. Curtis, D. H. Au, M. A. Spruit, L. Downey, J. M. G. A. Schols, E. F. M. Wouters, and R. A. Engelberg. 2011. 'Patient-clinician communication about end-of-life care for Dutch and US patients with COPD', <i>European Respiratory Journal</i> , 38: 268-76.                                    | Outcome: Preferences not addressed    |

|                                                                                                                                                                                                                                                                                                    |                                                    |
|----------------------------------------------------------------------------------------------------------------------------------------------------------------------------------------------------------------------------------------------------------------------------------------------------|----------------------------------------------------|
| Janssen, I. M., A. Gerhardus, G. D. von Gersdorff, C. A. Baldamus, M. Schaller, C. Barth, and F. Scheibler. 2015. 'Preferences of patients undergoing hemodialysis - Results from a questionnaire-based study with 4,518 patients', <i>Patient Preference and Adherence</i> , 9: 847-55.           | Population: Not multimorbid                        |
| Jayanti, A., M. Neuvonen, A. Wearden, J. Morris, P. Foden, P. Brenchley, S. Mitra, G. Wood, J. Mason, S. Reddy, and P. Ande. 2015. 'Healthcare decision-making in end stage renal disease-patient preferences and clinical correlates', <i>BMC Nephrology</i> , 16 (1) (no pagination).            | Population: Age <60 yrs.                           |
| Jennings, L. A., A. Palimaru, M. G. Corona, X. E. Cagigas, K. D. Ramirez, T. Zhao, R. D. Hays, N. S. Wenger, and D. B. Reuben. 2017. 'Patient and caregiver goals for dementia care', <i>Quality of Life Research</i> , 26: 685-93.                                                                | Outcome: Preferences from physicians or caregivers |
| Jerant, A. F., M. M. von Friederichs-Fitzwater, and M. Moore. 2005. 'Patients' perceived barriers to active self-management of chronic conditions', <i>Patient Educ Couns</i> , 57: 300-7.                                                                                                         | Outcome: Preferences not addressed                 |
| Joly, D., D. Anglicheau, C. Alberti, A. T. Nguyen, M. Touam, J. P. Grunfeld, and P. Jungers. 2003. 'Octogenarians reaching end-stage renal disease: Cohort study of decision-making and clinical outcomes', <i>Journal of the American Society of Nephrology</i> , 14: 1012-21.                    | Outcome: Preferences not addressed                 |
| Joubert, A., A. Kidd-Taylor, G. Christopher, J. Nanda, R. Warren, I. Lindong, and Y. Bronner. 2010. 'Complementary and alternative medical practice: self-care preferred vs. practitioner-based care among patients with asthma', <i>Journal of the National Medical Association</i> , 102: 562-9. | Population: Age <60 yrs.                           |
| Kamradt, M., J. Krisam, M. Kiel, M. Qreini, W. Besier, J. Szecsenyi, and D. Ose. 2017. 'Health-Related Quality of Life in Primary Care: Which Aspects Matter in Multimorbid Patients with Type 2 Diabetes Mellitus in a Community Setting?', 12: e0170883.                                         | Outcome: Preferences not addressed                 |
| Kangovi, S., N. Mitra, R. A. Smith, R. Kulkarni, L. Turr, H. Huo, K. Glanz, D. Grande, and J. A. Long. 2017. 'Decision-making and goal-setting in chronic disease management: Baseline findings of a randomized controlled trial', <i>Patient Education &amp; Counseling</i> , 100: 449-55.        | Population: Age <60 yrs.                           |
| Kaplan, A. L., C. M. Crespi, J. D. Saucedo, S. E. Connor, M. S. Litwin, and C. S. Saigal. 2014. 'Decisional conflict in economically disadvantaged men with newly diagnosed prostate cancer: Baseline results from a shared decision-making trial', <i>Cancer</i> , 120: 2721-27.                  | Population: Not multimorbid                        |
| Kaplan, A. L., C. M. Crespi, J. Saucedo, E. Dahan, S. Lambrechts, R. Kaplan, and C. Saigal. 2014. 'Predictors of decisional conflict in men with newly diagnosed prostate cancer: Baseline results from a shared decision-making trial', <i>Journal of Urology</i> , 1): e144-e45.                 | Duplicates                                         |
| Karlawish, J. H., A. Zbrozek, B. Kinosian, A. Gregory, A. Ferguson, and H. A. Glick. 2008. 'Preference-based quality of life in patients with Alzheimer's disease', <i>Alzheimer's and Dementia</i> , 4: 193-202.                                                                                  | Population: Not multimorbid                        |
| Karlsson, V., I. Bergbom, M. Ringdal, and A. Jonsson. 2016. 'After discharge home: a qualitative analysis of older ICU patients' experiences and care needs', <i>Scandinavian Journal of Caring Sciences</i> , 30: 749-56.                                                                         | Population: Not multimorbid                        |
| Karoff, M., W. Muller-Fahrnow, J. Kittel, H. O. Vetter, H. Gulker, and C. Spyra. 2002. '[Outpatient cardiological rehabilitation--acceptance and conditions related to choice of setting]', <i>Rehabilitation</i> , 41: 167-74.                                                                    | Population: Not multimorbid                        |

|                                                                                                                                                                                                                                                                         |                                                                                                                                                                                                                                                                                                                                                                                                                                                                                                                                                                                                                                                                                                                                                                                                                                                                                                                                                                                                                                                                                                                                                                                                                                                                                                                                                                                                                                                                                                                                                                                                                                                                                                                                                                                                                                                                                                                                                                                                                                                                                                                                                                                                                                                                                                                                                                                                                                                                                                                                                                                                                                                                                                                                                                                                                                                                                                                                                                                                                                                                                                                                                                                                                                                     |                                                                                                                                                                                                                                                                                                                                                                                                                                                                                                                                              |
|-------------------------------------------------------------------------------------------------------------------------------------------------------------------------------------------------------------------------------------------------------------------------|-----------------------------------------------------------------------------------------------------------------------------------------------------------------------------------------------------------------------------------------------------------------------------------------------------------------------------------------------------------------------------------------------------------------------------------------------------------------------------------------------------------------------------------------------------------------------------------------------------------------------------------------------------------------------------------------------------------------------------------------------------------------------------------------------------------------------------------------------------------------------------------------------------------------------------------------------------------------------------------------------------------------------------------------------------------------------------------------------------------------------------------------------------------------------------------------------------------------------------------------------------------------------------------------------------------------------------------------------------------------------------------------------------------------------------------------------------------------------------------------------------------------------------------------------------------------------------------------------------------------------------------------------------------------------------------------------------------------------------------------------------------------------------------------------------------------------------------------------------------------------------------------------------------------------------------------------------------------------------------------------------------------------------------------------------------------------------------------------------------------------------------------------------------------------------------------------------------------------------------------------------------------------------------------------------------------------------------------------------------------------------------------------------------------------------------------------------------------------------------------------------------------------------------------------------------------------------------------------------------------------------------------------------------------------------------------------------------------------------------------------------------------------------------------------------------------------------------------------------------------------------------------------------------------------------------------------------------------------------------------------------------------------------------------------------------------------------------------------------------------------------------------------------------------------------------------------------------------------------------------------------|----------------------------------------------------------------------------------------------------------------------------------------------------------------------------------------------------------------------------------------------------------------------------------------------------------------------------------------------------------------------------------------------------------------------------------------------------------------------------------------------------------------------------------------------|
| 1<br>2<br>3<br>4<br>5<br>6<br>7<br>8<br>9<br>10<br>11<br>12<br>13<br>14<br>15<br>16<br>17<br>18<br>19<br>20<br>21<br>22<br>23<br>24<br>25<br>26<br>27<br>28<br>29<br>30<br>31<br>32<br>33<br>34<br>35<br>36<br>37<br>38<br>39<br>40<br>41<br>42<br>43<br>44<br>45<br>46 | <p>Kates, Jeannette M. 2015. 'Treatment-related decisional conflict, quality of life, and comorbid illness in older adults with cancer', 75.</p> <p>Kaur, M., E. Ashbeck, D. Ran, C. K. Kwoh, and E. Vina. 2016. 'Knee pain and patient preference for knee replacement: Healthcare access matters', <i>Arthritis and Rheumatology</i>, 68 (Supplement 10): 1589-90.</p> <p>Keizer, J., I. Jzerman M.J, J. A. Van Til, and A. M. Wymenga. 2016. 'An a priori decision criteria elicitation method for treatment decision-making in elderly colorectal cancer patients', <i>Value in Health</i>, 19 (7): A392.</p> <p>Kelly, K. N., K. Noyes, J. Dolan, F. Fleming, J. R. Monson, M. Gonzalez, N. Sevdalis, and A. Dozier. 2016. 'Patient perspective on care transitions after colorectal surgery', <i>Journal of Surgical Research</i>, 203: 103-12.</p> <p>Khan, I. H., A. M. Garratt, A. Kumar, D. J. Cody, G. R. D. Catto, N. Edward, and A. M. MacLeod. 1995. 'Patients' perception of health on renal replacement therapy: Evaluation using a new instrument', <i>Nephrology Dialysis Transplantation</i>, 10: 684-89.</p> <p>Khokhar, O. S., and J. H. Lewis. 2007. 'Reasons why patients infected with chronic hepatitis C virus choose to defer treatment: Do they alter their decision with time?', <i>Digestive Diseases and Sciences</i>, 52: 1168-76.</p> <p>Kim, C., F. C. Wright, N. J. Look Hong, G. Groot, L. Helyer, P. Meiers, M. L. Quan, R. Urquhart, R. Warburton, and A. R. Gagliardi. 2018. 'Patient and provider experiences with active surveillance: A scoping review', <i>PLoS ONE</i>, 13 (2) (no pagination).</p> <p>Kim, D. H., and M. W. Rich. 2016. 'Patient-Centred Care of Older Adults With Cardiovascular Disease and Multiple Chronic Conditions', <i>Canadian Journal of Cardiology</i>, 32: 1097-107.</p> <p>Kim, J., S. Kim, S. W. Hong, S. W. Kang, and M. An. 2017. 'Validation of the Decisional Conflict Scale for Evaluating Advance Care Decision Conflict in Community-dwelling Older Adults', <i>Asian Nursing Research</i>, 11: 297-303.</p> <p>Kimmel, A. L., J. C. Wang, R. K. Scott, L. Briggs, and M. E. Lyon. 2015. 'Family CEntered (FACE) advance care planning: Study design and methods for a patient-centered communication and decision-making intervention for patients with HIV/AIDS and their surrogate decision-makers', <i>Contemporary Clinical Trials</i>, 43: 172-78.</p> <p>King Jr, J. T., M. A. Styn, J. Tsevat, and M. S. Roberts. 2003. "'Perfect health" versus "disease free": The impact of anchor point choice on the measurement of preferences and the calculation of disease-specific disutilities', <i>Medical Decision Making</i>, 23: 212-25.</p> <p>Kjoenniksen, I., M. Lindbaek, and A. G. Granas. 2006. 'Patients' attitudes towards and experiences of generic drug substitution in Norway', <i>Pharmacy World and Science</i>, 28: 284-89.</p> <p>Knight, S. J., D. P. Nathan, A. K. Siston, M. W. Kattan, A. S. Elstein, K. M. Collela, M. S. Wolf, N. S. Slimack, C. L. Bennett, and R. M. Golub. 2002. 'Pilot study of a utilities-based treatment decision intervention for prostate cancer patients', <i>Clinical Prostate Cancer</i>, 1: 105-14.</p> | <p>Outcome: Preferences not addressed</p> <p>Population: Not multimorbid</p> <p>Outcome: Preferences from physicians or caregivers</p> <p>Population: Age &lt;60 yrs.</p> <p>Outcome: Preferences not addressed</p> <p>Population: Age &lt;60 yrs.</p> <p>Population: Not multimorbid</p> <p>Document type: Editorials &amp; reviews</p> <p>Population: Not multimorbid</p> <p>Population: Age &lt;60 yrs.</p> <p>Outcome: Preferences not addressed</p> <p>Outcome: Preferences not addressed</p> <p>Outcome: Preferences not addressed</p> |
|-------------------------------------------------------------------------------------------------------------------------------------------------------------------------------------------------------------------------------------------------------------------------|-----------------------------------------------------------------------------------------------------------------------------------------------------------------------------------------------------------------------------------------------------------------------------------------------------------------------------------------------------------------------------------------------------------------------------------------------------------------------------------------------------------------------------------------------------------------------------------------------------------------------------------------------------------------------------------------------------------------------------------------------------------------------------------------------------------------------------------------------------------------------------------------------------------------------------------------------------------------------------------------------------------------------------------------------------------------------------------------------------------------------------------------------------------------------------------------------------------------------------------------------------------------------------------------------------------------------------------------------------------------------------------------------------------------------------------------------------------------------------------------------------------------------------------------------------------------------------------------------------------------------------------------------------------------------------------------------------------------------------------------------------------------------------------------------------------------------------------------------------------------------------------------------------------------------------------------------------------------------------------------------------------------------------------------------------------------------------------------------------------------------------------------------------------------------------------------------------------------------------------------------------------------------------------------------------------------------------------------------------------------------------------------------------------------------------------------------------------------------------------------------------------------------------------------------------------------------------------------------------------------------------------------------------------------------------------------------------------------------------------------------------------------------------------------------------------------------------------------------------------------------------------------------------------------------------------------------------------------------------------------------------------------------------------------------------------------------------------------------------------------------------------------------------------------------------------------------------------------------------------------------------|----------------------------------------------------------------------------------------------------------------------------------------------------------------------------------------------------------------------------------------------------------------------------------------------------------------------------------------------------------------------------------------------------------------------------------------------------------------------------------------------------------------------------------------------|



|                                                                                                                                                                                                                                                                                                                                                                   |                                       |
|-------------------------------------------------------------------------------------------------------------------------------------------------------------------------------------------------------------------------------------------------------------------------------------------------------------------------------------------------------------------|---------------------------------------|
| Ko, Eunjeong, and Jaehoon Lee. 2014. 'End-of-life treatment preference among low-income older adults: A race/ethnicity comparison study', <i>Journal of Health Care for the Poor and Underserved</i> , 25: 1021-33.                                                                                                                                               | Population: Not multimorbid           |
| Ko, J., E. Fox, P. Wicks, P. DasMahapatra, K. Kendall, W. Hong, E. Burton, K. Hawker, I. Kosoy, D. Liakhovitski, J. Park, and V. Herrera. 2016. 'Treatment preference in relapsing-remitting multiple sclerosis: An online choice study in patients and neurologists', <i>Neurology</i> . Conference: 68th American Academy of Neurology Annual Meeting, AAN, 86. | Population: Not multimorbid           |
| Ko, J., H. F. Kennecke, H. J. Lim, S. Gill, R. Woods, C. Speers, and W. Y. Cheung. 2012. 'Reasons for and outcomes of adjuvant chemotherapy choices in elderly patients with resected stage III colon cancer', <i>Journal of Clinical Oncology</i> . Conference, 30.                                                                                              | Outcome: Preferences not addressed    |
| Konig, H. H., S. Bernert, and M. C. Angermeyer. 2005. '[Measuring preferences for depressive health states]', <i>Psychiatrische Praxis</i> , 32: 122-31.                                                                                                                                                                                                          | Population: Age <60 yrs.              |
| Kromer, C., M. L. Schaarschmidt, A. Schmieder, R. Herr, S. Goerd, and W. K. Peitsch. 2014. 'Patient preferences for treatment of psoriasis with biologics: A discrete choice experiment', <i>British Journal of Dermatology</i> , 171 (6): e125.                                                                                                                  | Population: Age <60 yrs.              |
| Kruschinski, C., A. Klaassen, A. Breull, A. Broll, and E. Hummers-Pradier. 2010. 'Priorities of elderly dizzy patients in general practice. Findings and psychometric properties of the "Dizziness Needs Assessment" (DiNA)', <i>Zeitschrift fur Gerontologie und Geriatrie</i> , 43: 317-23.                                                                     | Population: Not multimorbid           |
| Kubacka, R. T., and R. P. Juhl. 1985. 'Attitudes of patients with hypertension or arthritis toward the frequency of medication administration', <i>Am J Hosp Pharm</i> , 42: 2499-501.                                                                                                                                                                            | Population: Not multimorbid           |
| Laakkonen, M. L., K. H. Pitkala, T. E. Strandberg, S. Berglind, and R. S. Tilvis. 2005. 'Older people's reasoning for resuscitation preferences and their role in the decision-making process', <i>Resuscitation</i> , 65: 165-71.                                                                                                                                | Population: Not multimorbid           |
| Laba, T. L., J. A. Brien, and S. Jan. 2012. 'Understanding rational non-adherence to medications. A discrete choice experiment in a community sample in Australia', <i>BMC Family Practice</i> , 13: 61.                                                                                                                                                          | Population: Age <60 yrs.              |
| LaDonna, K. A., J. Bates, G. R. Tait, A. McDougall, V. Schulz, and L. Lingard. 2017. "'Who is on your health-care team?' Asking individuals with heart failure about care team membership and roles', <i>Health expectations : an international journal of public participation in health care and health policy</i> , 20: 198-210.                               | Outcome: Preferences not addressed    |
| Lærum, Even, Siri Steine, Arnstein Finset, and Sverre Lundevall. 1998. 'Complex health problems in general practice: Do we need an instrument for consultation improvement and patient involvement? Theoretical foundation, development and user evaluation of the Patient Perspective Survey (PPS)', <i>Family Practice</i> , 15: 172-81.                        | Outcome: Preferences not addressed    |
| Laiteerapong, N., E. S. Huang, M. H. Chin, and N. Y. Acad Sci Annals. 2011. 'Prioritization of care in adults with diabetes and comorbidity', 1243: 69-87.                                                                                                                                                                                                        | Outcome: Preferences not addressed    |
| Lane, H., S. A. McLachlan, and J. Philip. 2014. 'Decision making factors in consultations between older people and their oncologists', <i>Asia-Pacific Journal of Clinical Oncology</i> , 9): 128-29.                                                                                                                                                             | Document type: Conference proceedings |

|                                                                                                                                                                                                                                                                                                                                                                                            |                                    |
|--------------------------------------------------------------------------------------------------------------------------------------------------------------------------------------------------------------------------------------------------------------------------------------------------------------------------------------------------------------------------------------------|------------------------------------|
| Lang, V., S. Walter, J. Fessler, M. J. Koester, D. Ruetters, and J. Huebner. 2017. 'The role of the general practitioner in cancer care: a survey of the patients' perspective', <i>Journal of Cancer Research and Clinical Oncology</i> , 143: 895-904.                                                                                                                                   | Population: Not multimorbid        |
| Lannin, N. 2003. 'Goal attainment scaling allows program evaluation of a home-based occupational therapy program', <i>Occupational Therapy in Health Care</i> , 17: 43-54.                                                                                                                                                                                                                 | Population: Age <60 yrs.           |
| Larson, C. O., E. C. Nelson, D. Gustafson, and P. B. Batalden. 1996. 'The relationship between meeting patients' information needs and their satisfaction with hospital care and general health status outcomes', <i>International journal for quality in health care: journal of the International Society for Quality in Health Care / ISQua</i> , 8: 447-56.                            | Population: Not multimorbid        |
| Laudet, Alexandre B., and William White. 2010. 'What are your priorities right now? Identifying service needs across recovery stages to inform service development', <i>Journal of Substance Abuse Treatment</i> , 38: 51-59.                                                                                                                                                              | Population: Age <60 yrs.           |
| Lavelle, K., A. M. Sowerbutts, N. Bundred, M. Pilling, L. Degner, C. Stockton, and C. Todd. 2014. 'Is lack of surgery for older breast cancer patients in the UK explained by patient choice or poor health A prospective cohort study', <i>British Journal of Cancer</i> , 110: 573-83.                                                                                                   | Population: Not multimorbid        |
| Lechner, S., W. Herzog, F. Boehlen, I. Maatouk, K. U. Saum, H. Brenner, and B. Wild. 2016. 'Control preferences in treatment decisions among older adults - Results of a large population-based study', <i>Journal of Psychosomatic Research</i> , 86: 28-33.                                                                                                                              | Population: Not multimorbid        |
| Lederer, S., M. J. Fischer, H. S. Gordon, A. Wadhwa, S. Popli, and E. J. Gordon. 2016. 'A question prompt sheet for adult patients with chronic kidney disease', <i>BMC Nephrology</i> , 17 (1) (no pagination).                                                                                                                                                                           | Outcome: Preferences not addressed |
| Lee, P. Y., E. M. Khoo, W. Y. Low, Y. K. Lee, K. L. Abdullah, S. A. Azmi, and C. J. Ng. 2016. 'Mismatch between health-care professionals' and patients' views on a diabetes patient decision aid: a qualitative study', <i>Health expectations: an international journal of public participation in health care and health policy</i> , 19: 427-36.                                       | Population: Age <60 yrs.           |
| Lee, Y. K., C. J. Ng, and W. Y. Low. 2017. 'Addressing unmet needs of patients with chronic diseases: Impact of the VISIT website during consultations', <i>Journal of Evaluation in Clinical Practice</i> , 23: 1281-88.                                                                                                                                                                  | Outcome: Preferences not addressed |
| Legros, B., P. Boon, B. Ceulemans, T. Coppens, K. Geens, H. Hauman, L. Lagae, A. Meurs, L. Mol, M. Ossemann, K. van Rijckevorsel, M. Van Zandijcke, P. Vrielynck, D. Wagemans, and T. Grisar. 2012. 'Development of an electronic decision tool to support appropriate treatment choice in adult patients with epilepsy--Epi-Scope()', <i>Seizure</i> , 21: 32-9.                          | Outcome: Preferences not addressed |
| Lenferink, A., P. Frith, P. van der Valk, J. Buckman, R. Sladek, P. Cafarella, J. van der Palen, and T. Effing. 2013. 'A self-management approach using self-initiated action plans for symptoms with ongoing nurse support in patients with Chronic Obstructive Pulmonary Disease (COPD) and comorbidities: the COPE-III study protocol', <i>Contemporary Clinical Trials</i> , 36: 81-9. | Outcome: Preferences not addressed |
| Leonardsen, A. L., and L. P. Jelsness-Jorgensen. 2017. 'Patient experiences and predictors in an acute geriatric ward: A cross-sectional study', <i>Journal of Clinical Nursing</i> , 26: 4567-73.                                                                                                                                                                                         | Outcome: Preferences not addressed |

|                                                                                                                                                                                                                                                                                                                                                                                                                |                                       |
|----------------------------------------------------------------------------------------------------------------------------------------------------------------------------------------------------------------------------------------------------------------------------------------------------------------------------------------------------------------------------------------------------------------|---------------------------------------|
| Lewis, C. L., C. E. Kistler, H. R. Amick, L. C. Watson, D. L. Bynum, L. C. Walter, and M. P. Pignone. 2006. 'Older adults' attitudes about continuing cancer screening later in life: a pilot study interviewing residents of two continuing care communities', <i>BMC Geriatrics</i> , 6: 10.                                                                                                                 | Population: Not multimorbid           |
| Lewis, C. L., C. P. DeLeon, M. P. Pignone, and C. E. Golin. 2011. 'Decision support and individualized decision making for colorectal cancer screening in the elderly', <i>Journal of General Internal Medicine</i> , 1): S120-S21.                                                                                                                                                                            | Document type: Conference proceedings |
| Lewis, C. L., T. Fried, J. S. Ross, J. Aminawung, L. Werner, C. Kistler, M. Tinetti, K. McKenzie, I. Genao, and C. Gross. 2012. 'Understanding and decision making about screening colonoscopy for older persons with multimorbidity', <i>Journal of General Internal Medicine</i> , 2): S341.                                                                                                                 | Document type: Conference proceedings |
| Lewis, C., C. P. DeLeon, M. P. Pignone, and C. Golin. 2011. 'Patient and physician discussions after decision support for colorectal cancer screening in the elderly', <i>Journal of General Internal Medicine</i> , 1): S118.                                                                                                                                                                                 | Duplicates                            |
| Lewis, E. F., P. A. Johnson, W. Johnson, C. Collins, L. Griffin, and L. W. Stevenson. 2001. 'Preferences for quality of life or survival expressed by patients with heart failure', <i>Journal of Heart and Lung Transplantation</i> , 20: 1016-24.                                                                                                                                                            | Population: Age <60 yrs.              |
| Liska, J., and A. Beal. 2017. 'One Patient Is Not One Condition: Delivering Patient-Centered Care to Those With Multiple Chronic Conditions', <i>Therapeutic Innovation and Regulatory Science</i> , 51: 468-70.                                                                                                                                                                                               | Document type: Editorials & reviews   |
| Liu, L. N., C. H. Chen, T. W. Liu, Y. C. Lin, S. C. K. Lee, and S. T. Tang. 2015. 'Preferences for aggressive end-of-life care and their determinants among Taiwanese terminally ill cancer patients', <i>Cancer Nursing</i> , 38: E9-E18.                                                                                                                                                                     | Document type: Conference proceedings |
| Lo, C., D. Ilic, H. Teede, A. Cass, G. Fulcher, M. Gallagher, G. Johnson, P. G. Kerr, T. Mathew, K. Murphy, K. Polkinghorne, R. Walker, and S. Zoungas. 2016. 'The perspectives of patients on health-care for co-morbid diabetes and chronic kidney disease: A qualitative study', <i>PLoS ONE</i> , 11 (1) (no pagination).                                                                                  | Outcome: Preferences not addressed    |
| Lo, C., Y. Tran, K. Anderson, A. Craig, and J. Middleton. 2016. 'Functional Priorities in Persons with Spinal Cord Injury: Using Discrete Choice Experiments To Determine Preferences', <i>Journal of Neurotrauma</i> , 33: 1958-68.                                                                                                                                                                           | Population: Age <60 yrs.              |
| Loffler, C., A. Altiner, W. Streich, C. O. Stolzenbach, A. Fuchs, E. Drewelow, A. Hornung, G. Feldmeier, H. van den Bussche, and H. Kaduszkiewicz. 2015. '[Approaches of general practitioners and patients to multimorbidity. Qualitative study]', <i>Zeitschrift für Gerontologie und Geriatrie</i> , 48: 452-6.                                                                                             | Outcome: Preferences not addressed    |
| Loffler, C., E. Drewelow, S. D. Paschka, M. Frankenstein, J. Eger, L. Jatsch, E. C. Reisinger, J. F. Hallauer, B. Drewelow, K. Heidorn, H. Schroder, A. Wollny, G. Kundt, C. Schmidt, and A. Altiner. 2014. 'Optimizing polypharmacy among elderly hospital patients with chronic diseases--study protocol of the cluster randomized controlled POLITE-RCT trial', <i>Implementation science: IS</i> , 9: 151. | Outcome: Preferences not addressed    |
| Loffler, C., H. Kaduszkiewicz, C. O. Stolzenbach, W. Streich, A. Fuchs, H. van den Bussche, F. Stolper, and A. Altiner. 2012. 'Coping with multimorbidity in old age--a qualitative study', <i>BMC Fam Pract</i> , 13: 45.                                                                                                                                                                                     | Outcome: Preferences not addressed    |
| Lum, H. D., and R. L. Sudore. 2016. 'Advance Care Planning and Goals of Care Communication in Older Adults with Cardiovascular Disease and Multi-Morbidity', <i>Clinics in Geriatric Medicine</i> , 32: 247-60.                                                                                                                                                                                                | Document type: Editorials & reviews   |

|                                                                                                                                                                                                                                                                                                                                                                                                                                           |                                       |
|-------------------------------------------------------------------------------------------------------------------------------------------------------------------------------------------------------------------------------------------------------------------------------------------------------------------------------------------------------------------------------------------------------------------------------------------|---------------------------------------|
| Lupari, M., V. Coates, G. Adamson, and G. E. Crealey. 2011. 'We're just not getting it right'--how should we provide care to the older person with multi-morbid chronic conditions?', <i>Journal of Clinical Nursing</i> , 20: 1225-35.                                                                                                                                                                                                   | Outcome: Preferences not addressed    |
| MacInnes, J. 2014. 'An exploration of illness representations and treatment beliefs in heart failure', <i>J Clin Nurs</i> , 23: 1249-56.                                                                                                                                                                                                                                                                                                  | Outcome: Preferences not addressed    |
| MacKinnon, H. J., A. L. Clarke, H. L. Young, K. L. Hull, J. O. Burton, and A. C. Smith. 2015. 'Creating a SPARK: Investigating exercise behaviour and preferences in patients with chronic kidney disease to aid the design of exercise programmes', <i>International Journal of Therapy &amp; Rehabilitation</i> , 22: 52-52.                                                                                                            | Document type: Conference proceedings |
| Madden, M., G. Furze, and R. J. Lewin. 2011. 'Complexities of patient choice in cardiac rehabilitation: Qualitative findings', <i>Journal of Advanced Nursing</i> , 67: 540-49.                                                                                                                                                                                                                                                           | Population: Not multimorbid           |
| Maeng, D. D., G. R. Martsolf, D. P. Scanlon, and J. B. Christianson. 2012. 'Care coordination for the chronically ill: understanding the patient's perspective', <i>Health Services Research</i> , 47: 1960-79.                                                                                                                                                                                                                           | Population: Age <60 yrs.              |
| Mahler, C., Sjank, K. Hermann, W. E. Haefell, and J. Szecsenyl. 2009. 'Information on medications - How do chronically ill patients assess counselling on drugs in general practice?. [German]', <i>Deutsche Medizinische Wochenschrift</i> , 134: 1620-24.                                                                                                                                                                               | Outcome: Preferences not addressed    |
| Mahmood, S., M. Van Oosterhout, S. De Jong, R. Landewe, P. Van Riel, and L. H. D. Van Tuyl. 2017. 'Evaluating quality of care in rheumatoid arthritis: The patient perspective', <i>RMD Open</i> , 3 (1) (no pagination).                                                                                                                                                                                                                 | Population: Age <60 yrs.              |
| Mahomed, R., W. St John, and E. Patterson. 2012. 'Understanding the process of patient satisfaction with nurse-led chronic disease management in general practice', <i>Journal of Advanced Nursing</i> , 68: 2538-49.                                                                                                                                                                                                                     | Outcome: Preferences not addressed    |
| Maly, R. C., B. Leake, and R. A. Silliman. 2003. 'Health care disparities in older patients with breast carcinoma: Informational support from physicians', <i>Cancer</i> , 97: 1517-27.                                                                                                                                                                                                                                                   | Population: Not multimorbid           |
| Mandelblatt, J. S., V. B. Sheppard, A. Hurria, G. Kimmick, C. Isaacs, K. L. Taylor, A. B. Kornblith, A. M. Noone, G. Luta, M. Tallarico, W. T. Barry, L. Hunegs, R. Zon, M. Naughton, E. Winer, C. Hudis, S. B. Edge, H. J. Cohen, and H. Muss. 2010. 'Breast cancer adjuvant chemotherapy decisions in older women: The role of patient preference and interactions with physicians', <i>Journal of Clinical Oncology</i> , 28: 3146-53. | Population: Not multimorbid           |
| Mandelblatt, J., B. Kreling, M. Figueiredo, and S. Feng. 2006. 'What is the impact of shared decision making on treatment and outcomes for older women with breast cancer?', <i>Journal of Clinical Oncology</i> , 24: 4908-13.                                                                                                                                                                                                           | Outcome: Preferences not addressed    |
| Mandelblatt, J., V. Sheppard, A. Hurria, G. Kimmick, C. Isaacs, K. Taylor, G. Luta, A. Noone, A. Kornblith, and W. Barry. 2009. 'Patient preference as a determinant of breast cancer adjuvant chemotherapy use in older women: CALGB #369901', <i>Journal of Clinical Oncology</i> , 1): 9544.                                                                                                                                           | Document type: Conference proceedings |
| Maneze, D., S. Dennis, H. Y. Chen, J. Taggart, S. Vagholkar, J. Bunker, and S. T. Liaw. 2014. 'Multidisciplinary care: experience of patients with complex needs', <i>Aust J Prim Health</i> , 20: 20-6.                                                                                                                                                                                                                                  | Outcome: Preferences not addressed    |

|                                  |                                                                                                                                                                                                                                                                                                                                                                                                                                                                                                                                             |                                     |
|----------------------------------|---------------------------------------------------------------------------------------------------------------------------------------------------------------------------------------------------------------------------------------------------------------------------------------------------------------------------------------------------------------------------------------------------------------------------------------------------------------------------------------------------------------------------------------------|-------------------------------------|
| 1<br>2<br>3<br>4<br>5            | Mangin, D., G. Stephen, V. Bismah, and C. Risdon. 2016. 'Making patient values visible in healthcare: A systematic review of tools to assess patient treatment priorities and preferences in the context of multimorbidity', <i>BMJ Open</i> , 6 (6) (no pagination).                                                                                                                                                                                                                                                                       | Outcome: Preferences not addressed  |
| 6<br>7                           | Manigault, A. W., I. M. Handley, and S. R. Whillock. 2015. 'Assessment of unconscious decision aids applied to complex patient-centered medical decisions', <i>Journal of medical Internet research</i> , 17: e37.                                                                                                                                                                                                                                                                                                                          | Population: Age <60 yrs.            |
| 8<br>9<br>10                     | Markowitz, J. C., K. B. Meehan, E. Petkova, Y. Zhao, P. E. Van Meter, Y. Neria, H. Pessin, and Y. Nazia. 2016. 'Treatment preferences of psychotherapy patients with chronic PTSD', <i>Journal of Clinical Psychiatry</i> , 77: 363-70.                                                                                                                                                                                                                                                                                                     | Population: Age <60 yrs.            |
| 11<br>12<br>13                   | Marques, I., D. Petty, T. Raynor, and A. Blenkinsopp. 2017. 'Reducing inappropriate polypharmacy through a patient-centred, shared decision-making model of deprescribing', <i>Pharmacoepidemiology and Drug Safety</i> , 26 (Supplement 1): 12-13.                                                                                                                                                                                                                                                                                         | Document type: Editorials & reviews |
| 14<br>15<br>16                   | Marschall-Kehrel, D., R. G. Roberts, and L. Brubaker. 2006. 'Patient-reported outcomes in overactive bladder: the influence of perception of condition and expectation for treatment benefit', <i>Urology</i> , 68: 29-37.                                                                                                                                                                                                                                                                                                                  | Outcome: Preferences not addressed  |
| 17<br>18                         | Mathar, Helle, Pernille Fastholm, Peter Lange, and Niels Sandholm Larsen. 2017. 'Why do patients decline participation in offered pulmonary rehabilitation? A qualitative study', <i>Clinical Rehabilitation</i> , 31: 1674-83.                                                                                                                                                                                                                                                                                                             | Outcome: Preferences not addressed  |
| 19<br>20<br>21                   | Mayo, N. M., M. Wallhagen, J. Johnson, and B. Miller. 2013. 'Health care decision-making among older adults with mild cognitive impairment', <i>Journal of the American Geriatrics Society</i> , 3): S342.                                                                                                                                                                                                                                                                                                                                  | Outcome: Preferences not addressed  |
| 22<br>23                         | McGee, M. A., D. W. Howie, P. Ryan, J. R. Moss, and O. T. Holubowycz. 2002. 'Comparison of patient and doctor responses to a total hip arthroplasty clinical evaluation questionnaire', <i>Journal of Bone &amp; Joint Surgery - American Volume</i> , 84-A: 1745-52.                                                                                                                                                                                                                                                                       | Outcome: Preferences not addressed  |
| 24<br>25<br>26<br>27<br>28       | McGilton, K. S., S. Vellani, L. Yeung, J. Chishtie, E. Commisso, J. Ploeg, M. K. Andrew, A. P. Ayala, M. Gray, D. Morgan, A. F. Chow, E. Parrott, D. Stephens, L. Hale, M. Keatings, J. Walker, W. P. Wodchis, V. Dube, J. McElhaney, and M. Puts. 2018. 'Identifying and understanding the health and social care needs of older adults with multiple chronic conditions and their caregivers: a scoping review', <i>BMC Geriatr</i> , 18: 231.                                                                                            | Document type: Editorials & reviews |
| 29<br>30                         | McHorney, C., N. J. Zhang, and M. Villigran. 2012. 'Temporal-outcome framing preferences for prescription medication information among adults with chronic disease in the United States', <i>Value in Health</i> , 15 (4): A198.                                                                                                                                                                                                                                                                                                            | Population: Not multimorbid         |
| 31<br>32                         | McKenna, R. J., Sr. 1994. 'Clinical aspects of cancer in the elderly. Treatment decisions, treatment choices, and follow-up', <i>Cancer</i> , 74: 2107-17.                                                                                                                                                                                                                                                                                                                                                                                  | Document type: Editorials & reviews |
| 33<br>34<br>35<br>36<br>37<br>38 | McMullen, C. K., M. M. Safford, H. B. Bosworth, S. Phansalkar, A. Leong, M. B. Fagan, A. Trontell, M. Rumptz, M. L. Vandermeer, Education Centers for, Group Research on Therapeutics Patient-Centered Medication Management Workshop Working, W. B. Brinkman, R. Burkholder, L. Frank, K. Hommel, R. Mathews, M. C. Hornbrook, M. Seid, M. Fordis, B. Lambert, N. McElwee, and J. A. Singh. 2015. 'Patient-centered priorities for improving medication management and adherence', <i>Patient Education &amp; Counseling</i> , 98: 102-10. | Population: Age <60 yrs.            |

|                                                                                                                                                                                                                                                                                                                                                                                                              |                                       |
|--------------------------------------------------------------------------------------------------------------------------------------------------------------------------------------------------------------------------------------------------------------------------------------------------------------------------------------------------------------------------------------------------------------|---------------------------------------|
| Meranius, M. S., and L. M. Hammar. 2016. 'How does the healthcare system affect medication self-management among older adults with multimorbidity?', <i>Scand J Caring Sci</i> , 30: 91-8.                                                                                                                                                                                                                   | Outcome: Preferences not addressed    |
| Merlin, J. S., S. R. Young, M. O. Johnson, M. Saag, W. Demonte, R. Modi, S. Shurbaji, W. A. Anderson, R. Kerns, M. J. Bair, S. Kertesz, S. Davies, and J. M. Turan. 2017. 'Using Patient Perspectives to Inform the Development of a Behavioral Intervention for Chronic Pain in Patients with HIV: A Qualitative Study', <i>Pain medicine (Malden, Mass.)</i> , 18: 879-88.                                 | Population: Age <60 yrs.              |
| Mihaylov, S., C. Stark, E. McColl, N. Steen, A. Vanoli, G. Rubin, R. Curless, R. Barton, and J. Bond. 2008. 'Stepped treatment of older adults on laxatives. The STOOL trial', <i>Health Technology Assessment</i> , 12: iii-139.                                                                                                                                                                            | Population: Not multimorbid           |
| Millman, J., K. Galway, O. Santin, and J. Reid. 2016. 'Cancer and serious mental illness--patient, caregiver and professional perspectives: study protocol', <i>Journal of Advanced Nursing</i> , 72: 217-26.                                                                                                                                                                                                | Document type: Study protocols        |
| Mishuris, R. G., M. Stewart, G. M. Fix, T. Marcello, D. K. McInnes, T. P. Hogan, J. B. Boardman, and S. R. Simon. 2015. 'Barriers to patient portal access among veterans receiving home-based primary care: a qualitative study', <i>Health expectations : an international journal of public participation in health care and health policy</i> , 18: 2296-305.                                            | Outcome: Preferences not addressed    |
| Miskulin, D. C., K. B. Meyer, N. V. Athienites, A. A. Martin, N. Terrin, J. V. Marsh, N. E. Fink, J. Coresh, N. R. Powe, M. J. Klag, and A. S. Levey. 2002. 'Comorbidity and other factors associated with modality selection in incident dialysis patients: the CHOICE Study. Choices for Healthy Outcomes in Caring for End-Stage Renal Disease', <i>American Journal of Kidney Diseases</i> , 39: 324-36. | Outcome: Preferences not addressed    |
| Mittinty, M. M., A. Marshall, and G. Harvey. 2018. 'What integrated care means from an older person's perspective? A scoping review protocol', <i>BMJ Open</i> , 8 (3) (no pagination).                                                                                                                                                                                                                      | Document type: Study protocols        |
| Mockford, C., Z. Fritz, R. George, R. Court, A. Grove, B. Clarke, R. Field, and G. D. Perkins. 2015. 'Do not attempt cardiopulmonary resuscitation (DNACPR) orders: a systematic review of the barriers and facilitators of decision-making and implementation', <i>Resuscitation</i> , 88: 99-113.                                                                                                          | Outcome: Preferences not addressed    |
| Moise, N., S. Ye, C. Alcantara, K. Davidson, and I. Kronish. 2015. 'Depression and preference for shared decision making amongst patients with uncontrolled hypertension', <i>Psychosomatic Medicine</i> , 77 (3): A28.                                                                                                                                                                                      | Document type: Conference proceedings |
| Montague, L., B. A. Boland, and C. Wright. 2012. 'Use of advance directives in an elderly home-bound population', <i>Journal of General Internal Medicine</i> , 2): S342.                                                                                                                                                                                                                                    | Document type: Conference proceedings |
| Mooijaart, S. P., K. Broekhuizen, S. Trompet, A. J. M. de Craen, J. Gussekloo, A. Oleksik, D. van Heemst, G. J. Blauw, and M. Muller. 2015. 'Evidence-based medicine in older patients: How can we do better?', <i>Netherlands Journal of Medicine</i> , 73: 211-18.                                                                                                                                         | Outcome: Preferences not addressed    |
| Moorhouse, P., and L. H. Mallery. 2012. 'Palliative and therapeutic harmonization: A model for appropriate decision-making in frail older adults', <i>Journal of the American Geriatrics Society</i> , 60: 2326-32.                                                                                                                                                                                          | Outcome: Preferences not addressed    |

|                                                                                                                                                                                                                                                                                                                                                                       |                                                |
|-----------------------------------------------------------------------------------------------------------------------------------------------------------------------------------------------------------------------------------------------------------------------------------------------------------------------------------------------------------------------|------------------------------------------------|
| <p>Moraleda Barba, S., M. I. Ballesta Rodriguez, A. L. Delgado Quero, N. Lietor Villajos, A. Moreno Corredor, and M. Delgado Rodriguez. 2015. '[The adaptation and validation to Spanish of the questionnaire Aid to Capacity Evaluation (ACE), for the assessment of the ability of patients in medical decision-making]', <i>Atencion Primaria</i>, 47: 149-57.</p> | <p>Outcome: Preferences not addressed</p>      |
| <p>Morecroft, C., J. Cantrill, and M. P. Tully. 2006. 'Individual patient's preferences for hypertension management: a Q-methodological approach', <i>Patient Educ Couns</i>, 61: 354-62.</p>                                                                                                                                                                         | <p>Population: Age &lt;60 yrs.</p>             |
| <p>Morgan, J. L., M. Burton, K. Collins, K. J. Lifford, T. G. Robinson, K. L. Cheung, R. Audisio, M. W. Reed, L. Wyld, and Management Bridging Age Gap Trial. 2015. 'The balance of clinician and patient input into treatment decision-making in older women with operable breast cancer', <i>Psycho-Oncology</i>, 24: 1761-66.</p>                                  | <p>Population: Not multimorbid</p>             |
| <p>Morishige, R., H. Nakajima, K. Yoshizawa, J. Mahlich, and R. Sruamsiri. 2017. 'Preferences Regarding Shared Decision-Making in Japanese Inflammatory Bowel Disease Patients', <i>Advances in Therapy</i>, 33: 2242-56.</p>                                                                                                                                         | <p>Population: Age &lt;60 yrs.</p>             |
| <p>Morsch, P., A. R. Mirandola, I. C. Caberlon, and A. J. G. Bos. 2017. 'Factors associated with health-related decision-making in older adults from Southern Brazil', <i>Geriatrics &amp; Gerontology International</i>, 17: 798-803.</p>                                                                                                                            | <p>Population: Not multimorbid</p>             |
| <p>Mortsiefer, A., A. Altiner, A. Ernst, H. Kadusiewicz, A. Krahe, C. Mellert, I. Schafer, C. O. Stolzenbach, B. Wiese, and C. Loffler. 2017. 'Satisfaction with general practice care in German patients with multimorbidity: A cross-sectional study', <i>Family Practice</i>, 34: 452-58.</p>                                                                      | <p>Outcome: Preferences not addressed</p>      |
| <p>Moss, A. H. 2017. 'Integrating Supportive Care Principles Into Dialysis Decision Making: A Primer for Palliative Medicine Providers', <i>Journal of Pain and Symptom Management</i>, 53: 656-+.</p>                                                                                                                                                                | <p>Document type: Editorials &amp; reviews</p> |
| <p>Moultry, A. M., and I. O. Poon. 2008. 'Perceived value of a home-based medication therapy management program for the elderly', <i>The Consultant pharmacist : the journal of the American Society of Consultant Pharmacists</i>, 23: 877-85.</p>                                                                                                                   | <p>Outcome: Preferences not addressed</p>      |
| <p>Muhlbacher, A. C., and M. Nbling. 2010. 'Analysis of patients preferences: Direct assessment and discrete-choice experiment in therapy of adults with attention-deficit hyperactivity disorder', <i>Patient</i>, 3: 285-94.</p>                                                                                                                                    | <p>Population: Age &lt;60 yrs.</p>             |
| <p>Muhlbacher, A. C., S. Bethge, S. D. Reed, and K. A. Schulman. 2016. 'Patient Preferences for Features of Health Care Delivery Systems: A Discrete Choice Experiment', <i>Health Services Research</i>, 51: 704-27.</p>                                                                                                                                             | <p>Population: Age &lt;60 yrs.</p>             |
| <p>Muhlbacher, A. C., U. Junker, C. Juhnke, E. Stemmler, T. Kohlmann, F. Leverkus, and M. Nubling. 2015. 'Chronic pain patients' treatment preferences: a discrete-choice experiment', <i>European Journal of Health Economics</i>, 16: 613-28.</p>                                                                                                                   | <p>Population: Age &lt;60 yrs.</p>             |
| <p>Muralidhar, V., B. S. Rose, Y. W. Chen, M. D. Nezoslosky, and P. L. Nguyen. 2016. 'Association Between Travel Distance and Choice of Treatment for Prostate Cancer: Does Geography Reduce Patient Choice?', <i>International Journal of Radiation Oncology Biology Physics</i>, 96: 313-17.</p>                                                                    | <p>Population: Not multimorbid</p>             |

|                                                                                                                                                                                                                                                                                                                  |                                       |
|------------------------------------------------------------------------------------------------------------------------------------------------------------------------------------------------------------------------------------------------------------------------------------------------------------------|---------------------------------------|
| Murphy, D. J., D. Burrows, S. Santilli, A. W. Kemp, S. Tenner, B. Kreling, and J. Teno. 1994. 'THE INFLUENCE OF THE PROBABILITY OF SURVIVAL ON PATIENTS PREFERENCES REGARDING CARDIOPULMONARY-RESUSCITATION', <i>New England Journal of Medicine</i> , 330: 545-49.                                              | Population: Not multimorbid           |
| Murphy, D. J., G. J. Gahm, S. Santilli, P. North, S. C. N. Oliver, and H. Shapiro. 2002. 'Seniors' preferences for cancer screening and medication use based on absolute risk reduction', <i>Journals of Gerontology Series a-Biological Sciences and Medical Sciences</i> , 57: M100-M05.                       | Population: Not multimorbid           |
| Musila, N., M. Underwood, A. W. McCaskie, N. Black, A. Clarke, and J. H. van der Meulen. 2011. 'Referral recommendations for osteoarthritis of the knee incorporating patients' preferences', <i>Family Practice</i> , 28: 68-74.                                                                                | Outcome: Preferences not addressed    |
| Mutebi, A., T. L. Warholak, L. E. Hines, R. Plummer, and D. C. Malone. 2013. 'Assessing patients' information needs regarding drug-drug interactions', <i>Journal of the American Pharmacists Association</i> , 53: 39-45.                                                                                       | Outcome: Preferences not addressed    |
| Nct, University Yale, A. Hartford Foundation The John, Gordon, Foundation Betty Moore, Foundation Robert Wood Johnson, and Institute Patient-Centered Outcomes Research. 2018. "Patient Priorities Care (PPC)." In.                                                                                              | Ongoing study                         |
| Neumiller, J. J., R. Vandermause, B. J. Gates, P. David, M. Altman, K. R. Tuttle, C. Corbett, D. Sunwold, P. Benson, and G. Burton. 2015. 'Medication - Taking practices and preferences in patients with multiple chronic medical conditions (MCMC)', <i>American Journal of Kidney Diseases</i> , 65 (4): A61. | Document type: Conference proceedings |
| Neuner-Jehle, S. 2016. 'How to avoid polypharmacy in practice and hospital? An overview with practical tools. [German]', <i>Gynakologische Praxis</i> , 41: 337-46.                                                                                                                                              | Document type: Editorials & reviews   |
| Neuner-Jehle, S. 2017. 'Systematic approaches to reduce polypharmacy: An overview with practical tools. [German]', <i>Diabetologie</i> , 13: 85-90.                                                                                                                                                              | Document type: Editorials & reviews   |
| Neuner-Jehle, S., S. Zechmann, D. G. Maissen, T. Rosemann, and O. Senn. 2017. 'Patient-provider concordance in the perception of illness and disease: A cross-sectional study among multimorbid patients and their general practitioners in Switzerland', <i>Patient Preference and Adherence</i> , 11: 1451-58. | Outcome: Preferences not addressed    |
| Nguyen, G. C., A. Tuskey, T. M. Bayless, T. A. LaVeist, and S. R. Brant. 2008. 'Community-based health preferences for proctocolectomy: a race comparison', <i>Digestive Diseases &amp; Sciences</i> , 53: 741-6.                                                                                                | Population: Age <60 yrs.              |
| Nilsdotter, A. K., and F. Isaksson. 2010. 'Patient relevant outcome 7 years after total hip replacement for OA - A prospective study', <i>BMC Musculoskeletal Disorders</i> , 11 (no pagination).                                                                                                                | Outcome: Preferences not addressed    |
| Noel, L. 2010. 'An Ethnic/Racial Comparison of Causal Beliefs and Treatment Preferences for the Symptoms of Depression Among Patients with Diabetes', <i>Diabetes Educator</i> , 36: 816-27.                                                                                                                     | Population: Age <60 yrs.              |
| Noel, P., B. C. Frueh, A. C. Larme, and J. A. Pugh. 2005. 'Cottaborative care needs and preferences of primary care patients with muttimorbidity', <i>Health Expectations</i> , 8: 54-63.                                                                                                                        | Duplicates                            |



|                                                                                                                                                                                                                                                                                                                                                           |                                       |
|-----------------------------------------------------------------------------------------------------------------------------------------------------------------------------------------------------------------------------------------------------------------------------------------------------------------------------------------------------------|---------------------------------------|
| Nolte, C. H., A. Rakow, B. Landes-Fritzsche, H. Audebert, and P. U. Heuschmann. 2011. 'Improving stroke patients' satisfaction with their education about their disease', <i>Cerebrovascular Diseases</i> , 2): 76.                                                                                                                                       | Outcome: Preferences not addressed    |
| Norberg, E. B., K. Boman, B. Lofgren, and M. Brannstrom. 2014. 'Occupational performance and strategies for managing daily life among the elderly with heart failure', <i>Scand J Occup Ther</i> , 21: 392-9.                                                                                                                                             | Outcome: Preferences not addressed    |
| Norman, J., E. Phillips, and P. Mehta. 2013. 'Clinician and patient perspective in treatment decisions in MDS', <i>Leukemia Research</i> , 1): S96-S97.                                                                                                                                                                                                   | Outcome: Preferences not addressed    |
| Noroxe, K. B., G. Moth, H. T. Maindal, and P. Vedsted. 2013. 'Could the patient have been seen by a nurse; a questionnaire based survey of GP and patient views in Danish general practice', <i>BMC Fam Pract</i> , 14: 171.                                                                                                                              | Population: Not multimorbid           |
| O'Hare, A. M., M. K. Song, M. Kurella Tamura, and A. H. Moss. 2017. 'Research priorities for palliative care for older adults with advanced chronic kidney disease', <i>Journal of Palliative Medicine</i> , 20: 453-60.                                                                                                                                  | Document type: Editorials & reviews   |
| Older patients with multiple chronic conditions desire personalized care plans from their providers. <i>AHRQ Research Activities</i> 2009;(344):16-16                                                                                                                                                                                                     | No full-text available                |
| Olsson, K., U. Naslund, J. Nilsson, and A. Hornsten. 2016. 'Patients' Decision Making About Undergoing Transcatheter Aortic Valve Implantation for Severe Aortic Stenosis', <i>The Journal of cardiovascular nursing</i> , 31: 523-28.                                                                                                                    | Population: Not multimorbid           |
| Olveira, G., M. A. Martinez-Olmos, B. F. De Bobadilla, M. Ferrer, N. Virgili, B. Vega, M. Blanco, M. Layola, L. Lizan, and I. Gozalbo. 2018. 'Patients' and professionals' preferences in terms of the attributes of home enteral nutrition products in Spain. A discrete choice experiment', <i>European Journal of Clinical Nutrition</i> , 72: 272-80. | Population: Not multimorbid           |
| Olveira, G., M. A. Martinez-Olmos, B. Fernandez De Bobadilla, M. Ferrer, N. Virgili, B. Vega, M. Blanco, M. Layola, L. Lizan, and M. Tribaldos De Suarez. 2016. 'Preferences for the characteristics of home enteral nutrition (HEN) via tube feeding: A discrete-choice experiment', <i>Value in Health</i> , 19 (7): A472.                              | Document type: Conference proceedings |
| O'Malley, P. G., J. Hanson, D. Becher, and J. L. Jackson. 2012. 'Patient and physician concordance on perceived degree of shared decision making of the same medical encounter', <i>Journal of General Internal Medicine</i> , 2): S264.                                                                                                                  | Document type: Conference proceedings |
| O'Neal, Erica L., Jared R. Adams, Gregory J. McHugo, Aricca D. Van Citters, Robert E. Drake, and Stephen J. Bartels. 2008. 'Preferences of older and younger adults with serious mental illness for involvement in decision-making in medical and psychiatric settings', <i>American Journal of Geriatric Psychiatry</i> , 16: 826-33.                    | Population: Age <60 yrs.              |
| O'Neill, T., C. Jinks, and B. N. Ong. 2007. 'Decision-making regarding total knee replacement surgery: a qualitative meta-synthesis', <i>BMC Health Services Research</i> , 7: 52.                                                                                                                                                                        | Outcome: Preferences not addressed    |
| Ortiz, D. V., R. O. Martinez, and D. V. Espino. 2015. 'Framing Effects on End-of-Life Preferences Among Latino Elders', <i>Social Work in Health Care</i> , 54: 708-24.                                                                                                                                                                                   | Population: Not multimorbid           |

|                                                                                                                                                                                                                                                                                                                                      |                                       |
|--------------------------------------------------------------------------------------------------------------------------------------------------------------------------------------------------------------------------------------------------------------------------------------------------------------------------------------|---------------------------------------|
| Osse, B. H., M. J. Vernooij, E. Schade, and R. P. Grol. 2004. 'Towards a new clinical tool for needs assessment in the palliative care of cancer patients: the PNP instrument', <i>Journal of Pain &amp; Symptom Management</i> , 28: 329-41.                                                                                        | Population: Age <60 yrs.              |
| Ouanes, I., N. Stambouli, F. Dachraoui, L. Ouanes-Besbes, S. Toumi, F. B. Salem, M. Gahbiche, and F. Abroug. 2012. 'Pattern of end-of-life decisions in two Tunisian intensive care units: The role of culture and intensivists' training', <i>Intensive Care Medicine</i> , 38: 710-17.                                             | Population: Not multimorbid           |
| Ozdemir, S., C. Malhotra, T. Jafar, L. Choong, and E. Finkelstein. 2016. 'Preferences for treatment of end-stage renal disease among elderly patients and caregivers in a multi-ethnic population in Singapore', <i>Journal of Pain and Symptom Management</i> , 52 (6): e110-e111.                                                  | Document type: Conference proceedings |
| Panocchia, N., M. Bossola, and L. Tazza. 2014. 'Decision-making in the implementation or withdrawal of dialysis in the old complex patient', <i>Italian Journal of Medicine</i> , 8: 6-10.                                                                                                                                           | Document type: Editorials & reviews   |
| Paskins, Z., T. Sanders, P. R. Croft, and A. B. Hassell. 2015. 'The Identity Crisis of Osteoarthritis in General Practice: A Qualitative Study Using Video-Stimulated Recall', <i>Annals of Family Medicine</i> , 13: 537-44.                                                                                                        | Outcome: Preferences not addressed    |
| Patel, M. J., M. S. Khan, F. Ali, Z. Kazmi, T. Riaz, S. Awan, and A. L. Sorathia. 2013. 'Patients' Insight of Interpreting Prescriptions and Drug Labels - A Cross Sectional Study', <i>PLoS ONE</i> , 8 (6) (no pagination).                                                                                                        | Outcome: Preferences not addressed    |
| Patel, M., R. Ferris, and C. S. Blaum. 2017. 'Building an evidence base for patient goals directed aligned care: An analysis of the health and retirement study', <i>Journal of the American Geriatrics Society</i> , 65 (Supplement 1): S139.                                                                                       | Document type: Conference proceedings |
| Paterson, B., S. Thorne, and C. Russell. 2002. 'Disease-specific influences on meaning and significance in self-care decision-making in chronic illness', <i>The Canadian journal of nursing research = Revue canadienne de recherche en sciences infirmieres</i> , 34: 61-74.                                                       | Population: Not multimorbid           |
| Patton, D., C. Hughes, C. A. Cadogan, J. Francis, G. J. Gormley, N. Kerse, P. Passmore, and C. Ryan. 2015. 'Using the Theoretical Domains Framework (TDF) to explore barriers and facilitators to adherence to prescribed medicines in community-based older adults', <i>International Journal of Pharmacy Practice</i> , 2): 11-12. | Document type: Conference proceedings |
| Paxton, R. J., P. Nayak, W. C. Taylor, S. Chang, K. S. Courneya, L. Schover, K. Hodges, and L. A. Jones. 2014. 'African-American breast cancer survivors' preferences for various types of physical activity interventions: a Sisters Network Inc. web-based survey', <i>Journal of Cancer Survivorship</i> , 8: 31-8.               | Population: Age <60 yrs.              |
| Payne, S., S. Hawker, C. Kerr, D. Seamark, H. Roberts, N. Jarrett, and H. Smith. 2007. 'Experiences of end-of-life care in community hospitals', <i>Health Soc Care Community</i> , 15: 494-501.                                                                                                                                     | Outcome: Preferences not addressed    |
| Peeters, P., W. Van Biesen, N. Veys, W. Lemahieu, B. De Moor, and J. De Meester. 2016. 'External Validation of a risk stratification model to assist shared decision making for patients starting renal replacement therapy', <i>BMC Nephrology</i> , 17 (1) (no pagination).                                                        | Outcome: Preferences not addressed    |

|                                                                                                                                                                                                                                                                                                                                                                                                                                                                                                   |                                           |
|---------------------------------------------------------------------------------------------------------------------------------------------------------------------------------------------------------------------------------------------------------------------------------------------------------------------------------------------------------------------------------------------------------------------------------------------------------------------------------------------------|-------------------------------------------|
| <p>Petersen, J. J., M. A. Paulitsch, K. Mergenthal, J. Gensichen, H. Hansen, S. Weyerer, S. G. Riedel-Heller, A. Fuchs, W. Maier, H. Bickel, H. H. König, B. Wiese, H. van den Bussche, M. Scherer, A. Dahlhaus, and Grp MultiCare Study. 2014. 'Implementation of chronic illness care in German primary care practices - how do multimorbid older patients view routine care? A cross-sectional study using multilevel hierarchical modeling', <i>BMC Health Services Research</i>, 14: 10.</p> | <p>Outcome: Preferences not addressed</p> |
| <p>Piamjariyakul, U., C. E. Smith, M. Werkowitch, and A. Elyachar. 2012. 'Part I: heart failure home management: patients, multidisciplinary health care professionals and family caregivers' perspectives', <i>Appl Nurs Res</i>, 25: 239-45.</p>                                                                                                                                                                                                                                                | <p>Population: Age &lt;60 yrs.</p>        |
| <p>Piccoli, G. B., M. Nazha, I. Capizzi, F. N. Vigotti, S. Scognamiglio, V. Consiglio, E. Mongilardi, M. Bilocati, P. Avagnina, and E. Versino. 2016. 'Diet as a system: an observational study investigating a multi-choice system of moderately restricted low-protein diets', <i>BMC Nephrology</i>, 17: 1-11.</p>                                                                                                                                                                             | <p>Outcome: Preferences not addressed</p> |
| <p>Pieters, H. C., M. V. Heilemann, M. Grant, and R. C. Maly. 2011. 'Older women's reflections on accessing care across their breast cancer trajectory: navigating beyond the triple barriers', <i>Oncology Nursing Forum</i>, 38: 175-84.</p>                                                                                                                                                                                                                                                    | <p>Population: Not multimorbid</p>        |
| <p>Pileckyte, R., T. Zvirblis, V. Ivanauskaite, I. Klimiene, and L. Griskevicius. 2013. 'Chronic lymphocytic leukemia (CLL): Epidemiology, comorbidities and treatment preference in daily clinical practice', <i>Haematologica</i>, 1): 546.</p>                                                                                                                                                                                                                                                 | <p>Population: Not multimorbid</p>        |
| <p>Plouvier, A. O. A., T. C. O. Hartman, C. E. M. Verhulst, B. R. Bloem, C. van Weel, and A. L. M. Lagro-Janssen. 2017. 'Parkinson's disease: Patient and general practitioner perspectives on the role of primary care', <i>Family Practice</i>, 34: 227-33.</p>                                                                                                                                                                                                                                 | <p>Population: Not multimorbid</p>        |
| <p>Politi, M. C., N. George, T. Li, K. M. Korenblat, K. J. Fowler, C. Ho, A. Liapakis, D. Roth, and J. Yee. 2018. 'Project HELP: a study protocol to pilot test a shared decision-making tool about treatment options for patients with hepatitis C and chronic kidney disease', <i>Pilot &amp; Feasibility Studies</i>, 4: 55.</p>                                                                                                                                                               | <p>Document type: Study protocols</p>     |
| <p>Pollard, A., C. Llewellyn, V. Cooper, M. Sachikonye, N. Perry, E. Nixon, A. Miners, E. Youssef, and C. Sabin. 2018. 'Patients' perspectives on the development of HIV services to accommodate ageing with HIV: a qualitative study', <i>International Journal of STD and AIDS</i>, 29: 483-90.</p>                                                                                                                                                                                             | <p>Population: Age &lt;60 yrs.</p>        |
| <p>Porras, C. J. 2016. 'Proposal of practical "patient based model" for decision making in critical limb ischemia (CLI) patients', <i>Vascular</i>, 24 (1 Supplement 1): 64.</p>                                                                                                                                                                                                                                                                                                                  | <p>Outcome: Preferences not addressed</p> |
| <p>Protheroe, J., T. Fahey, A. A. Montgomery, and T. J. Peters. 2000. 'The impact of patients' preferences on the treatment of atrial fibrillation: Observational study of patient based decision analysis', <i>British Medical Journal</i>, 320: 1380-84.</p>                                                                                                                                                                                                                                    | <p>Population: Not multimorbid</p>        |
| <p>Protheroe, J., T. Fahey, A. A. Montgomery, and T. J. Peters. 2001. 'Effects of patients' preferences on the treatment of atrial fibrillation: Observational study of patient-based decision analysis', <i>Western Journal of Medicine</i>, 174: 311-15.</p>                                                                                                                                                                                                                                    | <p>Duplicates</p>                         |
| <p>Pujahari, A. K. 2016. 'Day care vs overnight stay after laparoscopic cholecystectomy even with co-morbidity and a possible second surgery: A patient's choice', <i>Journal of Clinical and Diagnostic Research</i>, 10: PC25-PC27.</p>                                                                                                                                                                                                                                                         | <p>Population: Age &lt;60 yrs.</p>        |

|                                                                                                                                                                                                                                                                                                                                                                                                                                                                         |                                       |
|-------------------------------------------------------------------------------------------------------------------------------------------------------------------------------------------------------------------------------------------------------------------------------------------------------------------------------------------------------------------------------------------------------------------------------------------------------------------------|---------------------------------------|
| <p>Puts, M. T. E., B. Tapscott, M. Fitch, D. Howell, J. Monette, D. Wan-Chow-Wah, M. Krzyzanowska, N. B. Leighl, E. Springall, and S. M. Alibhai. 2015. 'A systematic review of factors influencing older adults' decision to accept or decline cancer treatment', <i>Cancer Treatment Reviews</i>, 41: 197-215.</p>                                                                                                                                                    | Document type: Editorials & reviews   |
| <p>Puts, M. T., B. Tapscott, M. Fitch, D. Howell, J. Monette, D. Wan-Chow-Wah, M. K. Krzyzanowska, N. B. Leighl, E. Springall, and S. M. Alibhai. 2015. 'A systematic review of factors influencing older adults' hypothetical treatment decisions', <i>European Oncology and Haematology</i>, 11: 19-33.</p>                                                                                                                                                           | Document type: Editorials & reviews   |
| <p>Puts, M., S. Novak, D. Howell, M. Fitch, M. Krzyzanowska, N. Leighl, J. Monette, D. Wan-Chow-Wah, E. Springall, and S. M. H. Alibhai. 2013. 'A systematic review of factors influencing older adults' decision to accept or refuse cancer treatment', <i>Supportive Care in Cancer</i>, 1): S202.</p>                                                                                                                                                                | Outcome: Preferences not addressed    |
| <p>Puts, M., S. Sattar, K. McWatters, K. Lee, M. Kulik, M. E. Macdonald, R. W. J. Jang, E. Amir, M. K. Krzyzanowska, N. B. Leighl, M. Fitch, A. M. Joshua, P. R. Warde, A. Tourangeau, and S. M. H. Alibhai. 2016. 'What is the role of comorbidity, frailty, and functional status in the decision-making process for older adults with cancer and their family members, oncologists, and family physician?', <i>Journal of Clinical Oncology. Conference</i>, 34.</p> | Duplicates                            |
| <p>Puts, M., S. Sattar, K. McWatters, K. Lee, M. Kulik, M. E. MacDonald, R. Jang, E. Amir, M. Krzyzanowska, N. Leighl, M. Fitch, A. Joshua, P. Warde, A. Tourangeau, and S. Alibhai. 2016. 'What is the role of comorbidity, frailty and functional status in treatment decision-making for older cancer patients and their family members, oncologists, and family physician?', <i>Supportive Care in Cancer</i>, 24 (1 Supplement 1): S45.</p>                        | Document type: Conference proceedings |
| <p>Quensell, M. L., D. A. Taira, T. B. Seto, K. L. Braun, and T. L. Sentell. 2017. "'I Need my Own Place to get Better": Patient Perspectives on the Role of Housing in Potentially Preventable Hospitalizations', <i>Journal of Health Care for the Poor &amp; Underserved</i>, 28: 784-97.</p>                                                                                                                                                                        | Outcome: Preferences not addressed    |
| <p>Radcliff, T. A., M. J. Cote, D. L. Olson, and D. Liebrecht. 2012. 'Rehabilitation Settings After Joint Replacement: An Application of Multiattribute Preference Elicitation', <i>Evaluation and the Health Professions</i>, 35: 182-98.</p>                                                                                                                                                                                                                          | Population: Not multimorbid           |
| <p>Rahemi, Z., and C. L. Williams. 2016. 'Older Adults of Underrepresented Populations and Their End-of-Life Preferences An Integrative Review', <i>Advances in Nursing Science</i>, 39: E1-E29.</p>                                                                                                                                                                                                                                                                    | Document type: Editorials & reviews   |
| <p>Ralphs-Thibodeau, S., F. Knoefel, K. Benjamin, A. Leclerc, S. Pisterman, J. Sohmer, and C. Scrim. 2006. 'Patient choice: An influencing factor on policy-related research to decrease bedrail use as physical restraint', <i>Worldviews on Evidence-Based Nursing</i>, 3: 31-39.</p>                                                                                                                                                                                 | Outcome: Preferences not addressed    |
| <p>Ramages, M., and G. Cheung. 2018. 'Why do older people refuse resuscitation? A qualitative study examining retirement village residents' resuscitation decisions', <i>Psychogeriatrics</i>, 18: 49-56.</p>                                                                                                                                                                                                                                                           | Population: Not multimorbid           |
| <p>Rao, A., F. Caskey, Y. Ben-Shlomo, and L. Biddle. 2016. 'Understanding patients' perspectives influencing participation within equal study in UK-a qualitative study', <i>Nephrology Dialysis Transplantation</i>, 1): i552.</p>                                                                                                                                                                                                                                     | Outcome: Preferences not addressed    |
| <p>Raven, M. C., C. C. Gillespie, R. DiBennardo, K. Van Busum, and B. Elbel. 2012. 'Vulnerable patients' perceptions of health care quality and quality data', <i>Medical decision making : an international journal of the Society for Medical Decision Making</i>, 32: 311-26.</p>                                                                                                                                                                                    | Population: Age <60 yrs.              |

1  
2  
3  
4  
5  
6  
7  
8  
9  
10  
11  
12  
13  
14  
15  
16  
17  
18  
19  
20  
21  
22  
23  
24  
25  
26  
27  
28  
29  
30  
31  
32  
33  
34  
35  
36  
37  
38  
39  
40  
41  
42  
43  
44  
45  
46

|                                                                                                                                                                                                                                                                                                                                             |                                       |
|---------------------------------------------------------------------------------------------------------------------------------------------------------------------------------------------------------------------------------------------------------------------------------------------------------------------------------------------|---------------------------------------|
| Reeve, E., L. F. Low, and S. N. Hilmer. 2016. 'Beliefs and attitudes of older adults and carers about deprescribing of medications: a qualitative focus group study', <i>British Journal of General Practice</i> , 66: e552-60.                                                                                                             | Outcome: Preferences not addressed    |
| Reeve, E., S. Shakib, I. Hendrix, M. S. Roberts, and M. D. Wiese. 2014. 'Review of deprescribing processes and development of an evidence-based, patient-centred deprescribing process', <i>British Journal of Clinical Pharmacology</i> , 78: 738-47.                                                                                      | Document type: Editorials & reviews   |
| Richter, D., J. Ernst, C. Lehmann, U. Koch, A. Mehnert, and M. Friedrich. 2015. 'Communication Preferences in Young, Middle-Aged, and Elderly Cancer Patients', <i>Oncology Research and Treatment</i> , 38: 590-5.                                                                                                                         | Population: Not multimorbid           |
| Ridgeway, J. L., J. S. Egginton, K. Tiedje, M. Linzer, D. Boehm, S. Poplau, D. R. de Oliveira, L. Odell, V. M. Montori, and D. T. Eton. 2014. 'Factors that lessen the burden of treatment in complex patients with chronic conditions: A qualitative study', <i>Patient Preference and Adherence</i> , 8: 339-51.                          | Population: Age <60 yrs.              |
| Riegel, B., V. V. Dickson, and M. Topaz. 2013. 'Qualitative analysis of naturalistic decision making in adults with chronic heart failure', <i>Nurs Res</i> , 62: 91-8.                                                                                                                                                                     | Outcome: Preferences not addressed    |
| Riffin, C., P. H. Van Ness, and T. Fried. 2017. 'Patient and caregiver perspectives on managing multiple health conditions', <i>Journal of the American Geriatrics Society</i> , 65 (Supplement 1): S183-S84.                                                                                                                               | Document type: Conference proceedings |
| Romo, Rafael Diaz. 2014. 'Decision Making Among Older Adults with a Limited Prognosis', Ph.D.: 162 p-62 p.                                                                                                                                                                                                                                  | Document type: Conference proceedings |
| Rood, J. A., F. J. van Zuuren, F. Stam, T. van der Ploeg, C. Eeltink, I. M. Verdonck-de Leeuw, and P. C. Huijgens. 2015. 'Perceived need for information among patients with a haematological malignancy: associations with information satisfaction and treatment decision-making preferences', <i>Hematological Oncology</i> , 33: 85-98. | Population: Not multimorbid           |
| Rosstad, T., H. Garasen, A. Steinsbekk, O. Sletvold, and A. Grimsmo. 2013. 'Development of a patient-centred care pathway across healthcare providers: a qualitative study', <i>BMC Health Services Research</i> , 13: 121.                                                                                                                 | Outcome: Preferences not addressed    |
| Roth, K., J. Lynn, Z. Zhong, M. Borum, and N. V. Dawson. 2000. 'Dying with end stage liver disease with cirrhosis: insights from SUPPORT. Study to Understand Prognoses and Preferences for Outcomes and Risks of Treatment', <i>Journal of the American Geriatrics Society</i> , 48: S122-30.                                              | Population: Age <60 yrs.              |
| Roy, A. N., S. S. Madhavan, and A. Lloyd. 2015. 'A Discrete Choice Experiment to Elicit Patient Willingness to Pay for Attributes of Treatment-Induced Symptom Relief in Comorbid. Insomnia', <i>Managed care (Langhorne, Pa.)</i> , 24: 42-48.                                                                                             | Population: Age <60 yrs.              |
| Ruggiano, N., and D. Edvardsson. 2013. 'Person-Centeredness in Home- and Community-Based Long-Term Care: Current Challenges and New Directions', <i>Social Work in Health Care</i> , 52: 846-61.                                                                                                                                            | Document type: Editorials & reviews   |
| Ruland, C. M. 1998. 'Integrating patient preferences for self-care capability in nursing care: effects on nurses' care priorities and patient outcomes', Ph.D.: 255 p-55 p.                                                                                                                                                                 | Document type: Conference proceedings |
| Rutecki, G. W., L. Rodriguez, A. Cugino, D. Jarjoura, F. Hastings, and F. C. Whittier. 1994. 'End of life issues in ESRD: A study of three decision variables that affect patient attitudes', <i>ASAIO Journal</i> , 40: M798-M802.                                                                                                         | Outcome: Preferences not addressed    |

|                                                                                                                                                                                                                                                                                                                                                                                                                                                           |                                    |
|-----------------------------------------------------------------------------------------------------------------------------------------------------------------------------------------------------------------------------------------------------------------------------------------------------------------------------------------------------------------------------------------------------------------------------------------------------------|------------------------------------|
| Ryoo, J. J., D. L. Ordin, A. L. M. Antonio, S. M. Oishi, M. K. Gould, S. M. Asch, and J. L. Malin. 2013. 'Patient preference and contraindications in measuring quality of care: What do administrative data miss?', <i>Journal of Clinical Oncology</i> , 31: 2716-23.                                                                                                                                                                                   | Population: Not multimorbid        |
| Sales, C., R. Tavares, L. Amado, P. Martins, J. Barros, V. Miranda, A. Santos-Silva, P. Mena-Matos, and E. Costa. 2017. 'Being here is a prison: Patient reported quality of life burdens associated to dialysis', <i>Nephrology Dialysis Transplantation</i> , 32 (Supplement 3): iii713.                                                                                                                                                                | Outcome: Preferences not addressed |
| Samalin, L., J. B. Genty, L. Boyer, J. Lopez-Castroman, M. Abbar, and P. M. Llorca. 2018. 'Shared Decision-Making: a Systematic Review Focusing on Mood Disorders', <i>Current Psychiatry Reports</i> , 20: 11.                                                                                                                                                                                                                                           | Population: Age <60 yrs.           |
| Sanchez-Ballester, F., P. Miranda, I. Lizarraga, J. Rejas, and D. Arumi. 2014. 'Therapeutic benefit in patients switching tolterodine to other novel antimuscarinic agents', <i>Actas urologicas espanolas</i> , 38: 156-63.                                                                                                                                                                                                                              | Outcome: Preferences not addressed |
| Sattar, S., S. M. H. Alibhai, M. Fitch, M. Krzyzanowska, N. Leighl, and M. T. E. Puts. 2018. 'Chemotherapy and radiation treatment decision-making experiences of older adults with cancer: A qualitative study', <i>Journal of Geriatric Oncology</i> , 9: 47-52.                                                                                                                                                                                        | Population: Not multimorbid        |
| Saunders, C. H., G. Elwyn, K. Kirkland, and M. A. Durand. 2018. 'Serious Choices: A Protocol for an Environmental Scan of Patient Decision Aids for Seriously Ill People at Risk of Death Facing Choices about Life-Sustaining Treatments', 11: 97-106.                                                                                                                                                                                                   | Outcome: Preferences not addressed |
| Schaarschmidt, M. L., C. Kromer, R. Herr, A. Schmieder, D. Sonntag, S. Goerdts, and W. K. Peitsch. 2015. 'Patient preferences for biologicals in psoriasis: Top priority of safety for cardiovascular patients', <i>PLoS ONE</i> , 10 (12) (no pagination).                                                                                                                                                                                               | Population: Age <60 yrs.           |
| Schaarschmidt, M. L., C. Kromer, R. Herr, A. Schmieder, S. Goerdts, and W. K. Peitsch. 2015. 'Patient preferences for treatment of psoriasis with biologicals: A discrete choice experiment', <i>Experimental Dermatology</i> , 24 (3): E18.                                                                                                                                                                                                              | Population: Age <60 yrs.           |
| Schers, H., S. Webster, H. Van Den Hoogen, A. Avery, R. Grol, and W. Van Den Bosch. 2002. 'Continuity of care in general practice: A survey of patients' views', <i>British Journal of General Practice</i> , 52: 459-62.                                                                                                                                                                                                                                 | Population: Age <60 yrs.           |
| Schmidt, H., S. Boese, K. Lampe, K. Jordan, E. Fiedler, U. Muller-Werdan, and D. Vordermark. 2018. 'Trans sectoral care of geriatric cancer patients - Results of a multicenter study to pilot test a patient-centered interdisciplinary care concept (PIVOG)', <i>Oncology Research and Treatment</i> , 41 (Supplement 1): 81-82.                                                                                                                        | Outcome: Preferences not addressed |
| Schmidt, H., S. Boese, K. Lampe, K. Jordan, E. Fiedler, U. Muller-Werdan, A. Wienke, and D. Vordermark. 2017. 'Trans sectoral care of geriatric cancer patients based on comprehensive geriatric assessment and patient-reported quality of life - Results of a multicenter study to develop and pilot test a patient-centered interdisciplinary care concept for geriatric oncology patients (PIVOG)', <i>Journal of Geriatric Oncology</i> , 8: 262-70. | Outcome: Preferences not addressed |
| Schmieder, A., M. L. Schaarschmidt, N. Umar, D. D. Terris, M. Goebeler, S. Goerdts, and W. K. Peitsch. 2012. 'Comorbidities significantly impact patients' preferences for psoriasis treatments', <i>Journal of the American Academy of Dermatology</i> , 67: 363-72.                                                                                                                                                                                     | Population: Age <60 yrs.           |

|                            |                                                                                                                                                                                                                                                                                                                                                                        |                                       |
|----------------------------|------------------------------------------------------------------------------------------------------------------------------------------------------------------------------------------------------------------------------------------------------------------------------------------------------------------------------------------------------------------------|---------------------------------------|
| 1<br>2<br>3<br>4<br>5<br>6 | Schmocker, R. K., S. E. Holden, X. Vang, G. E. Levenson, L. M. Cherney Stafford, and E. R. Winslow. 2015. 'Association of Patient-Reported Readiness for Discharge and Hospital Consumer Assessment of Health Care Providers and Systems Patient Satisfaction Scores: A Retrospective Analysis', <i>Journal of the American College of Surgeons</i> , 221: 1073-82.e3. | Outcome: Preferences not addressed    |
| 7<br>8<br>9                | Schneider, A., T. Korner, M. Mehring, M. Wensing, G. Elwyn, and J. Szecsenyi. 2006. 'Impact of age, health locus of control and psychological co-morbidity on patients' preferences for shared decision making in general practice', <i>Patient Education and Counseling</i> , 61: 292-98.                                                                             | Population: Age <60 yrs.              |
| 10<br>11<br>12             | Schoenberg, N. E., S. H. Bardach, K. N. Manchikanti, and A. C. Goodenow. 2011. 'Appalachian residents' experiences with and management of multiple morbidity', <i>Qual Health Res</i> , 21: 601-11.                                                                                                                                                                    | Population: Age <60 yrs.              |
| 13<br>14                   | Schoenborn, N., C. Boyd, M. McNabney, A. Ray, and D. Cayea. 2014. 'Current practices and opportunities in a resident clinic caring for older adults with multimorbidity', <i>Journal of the American Geriatrics Society</i> , 1): S4.                                                                                                                                  | Duplicates                            |
| 15<br>16<br>17             | Schonwetter, R. S., R. M. Walker, M. Solomon, A. Indurkha, and B. E. Robinson. 1996. 'Life values, resuscitation preferences, and the applicability of living wills in an older population', <i>Journal of the American Geriatrics Society</i> , 44: 954-58.                                                                                                           | Population: Not multimorbid           |
| 18<br>19                   | Schuling, J., R. Sytema, and A. J. Berendsen. 2013. '[Adjusting medication: elderly patient's preference counts]', <i>Ned Tijdschr Geneesk</i> , 157: A6491.                                                                                                                                                                                                           | Document type: Editorials & reviews   |
| 20<br>21                   | Schuling, J., R. Sytema, and A. J. Berendsen. 2013. '[Adjusting medication: elderly patient's preference counts]', <i>Ned Tijdschr Geneesk</i> , 157: A6491.                                                                                                                                                                                                           | Duplicates                            |
| 22<br>23<br>24             | Seematter-Bagnoud, L., J. Cornuz, and C. Bula. 2003. '[Screening and prevention in the elderly: which interventions should be proposed, to whom, and up to what age?]', <i>Revue medicale de la Suisse romande</i> , 123: 665-9.                                                                                                                                       | Document type: Editorials & reviews   |
| 25<br>26<br>27             | Sehouli, J., E. M. Schooning, and S. Mahner. 2011. 'What do elderly patients prefer? - A prospective multicenter study of preference for oral or intravenous treosulfan in elderly patients with recurrent ovarian cancer', <i>Journal of Oncology Pharmacy Practice</i> , 17 (1): 10.                                                                                 | Population: Not multimorbid           |
| 28<br>29<br>30             | Selten, E. M., J. E. Vrieseckolk, R. Geenen, W. H. van der Laan, R. G. van der Meulen-Dilling, M. W. Nijhof, H. J. Schers, and C. H. van den Ende. 2016. 'Reasons for Treatment Choices in Knee and Hip Osteoarthritis: A Qualitative Study', <i>Arthritis Care and Research</i> , 68: 1260-67.                                                                        | Population: Age <60 yrs.              |
| 31<br>32<br>33             | Sendur, M. A., K. Silay, S. Aksoy, S. Ozbek, N. Ozdemir, and K. Altundag. 2016. 'Effect of polypharmacy on treatment preferences and outcome in older breast cancer patients', <i>Annals of Oncology. Conference: 41st European Society for Medical Oncology Congress, ESMO</i> , 27.                                                                                  | Outcome: Preferences not addressed    |
| 34<br>35<br>36             | Sethares, K. A., C. Westlake, and J. Viveiros. 2017. 'Low literacy patients may prefer multi-modal patient education', <i>Journal of Cardiac Failure</i> , 23 (8 Supplement 1): S114.                                                                                                                                                                                  | Document type: Conference proceedings |
| 37<br>38<br>39             | Sewitch, M. J., M. Abrahamowicz, P. L. Dobkin, and R. Tamblyn. 2003. 'Measuring differences between patients' and physicians' health perceptions: The Patient-Physician Discordance Scale', <i>Journal of Behavioral Medicine</i> , 26: 245-64.                                                                                                                        | Population: Age <60 yrs.              |

40  
41  
42  
43  
44  
45  
46

|                                                                                                                                                                                                                                                                         |                                                                                                                                                                                                                                                                                                                                                                                                                                                                                                                                                                                                                                                                                                                                                                                                                                                                                                                                                                                                                                                                                                                                                                                                                                                                                                                                                                                                                                                                                                                                                                                                                                                                                                                                                                                                                                                                                                                                                                                                                                                                                                                                                                                                                                                                                                                                                                                                                                                                                                                                                                                                                                                                                                                                                                                                                                                                                                                                                                                                                                                                                                                                                                                                                                                                   |                                                                                                                                                                                                                                                                                                                                                                                                                                                                                                                                   |
|-------------------------------------------------------------------------------------------------------------------------------------------------------------------------------------------------------------------------------------------------------------------------|-------------------------------------------------------------------------------------------------------------------------------------------------------------------------------------------------------------------------------------------------------------------------------------------------------------------------------------------------------------------------------------------------------------------------------------------------------------------------------------------------------------------------------------------------------------------------------------------------------------------------------------------------------------------------------------------------------------------------------------------------------------------------------------------------------------------------------------------------------------------------------------------------------------------------------------------------------------------------------------------------------------------------------------------------------------------------------------------------------------------------------------------------------------------------------------------------------------------------------------------------------------------------------------------------------------------------------------------------------------------------------------------------------------------------------------------------------------------------------------------------------------------------------------------------------------------------------------------------------------------------------------------------------------------------------------------------------------------------------------------------------------------------------------------------------------------------------------------------------------------------------------------------------------------------------------------------------------------------------------------------------------------------------------------------------------------------------------------------------------------------------------------------------------------------------------------------------------------------------------------------------------------------------------------------------------------------------------------------------------------------------------------------------------------------------------------------------------------------------------------------------------------------------------------------------------------------------------------------------------------------------------------------------------------------------------------------------------------------------------------------------------------------------------------------------------------------------------------------------------------------------------------------------------------------------------------------------------------------------------------------------------------------------------------------------------------------------------------------------------------------------------------------------------------------------------------------------------------------------------------------------------------|-----------------------------------------------------------------------------------------------------------------------------------------------------------------------------------------------------------------------------------------------------------------------------------------------------------------------------------------------------------------------------------------------------------------------------------------------------------------------------------------------------------------------------------|
| 1<br>2<br>3<br>4<br>5<br>6<br>7<br>8<br>9<br>10<br>11<br>12<br>13<br>14<br>15<br>16<br>17<br>18<br>19<br>20<br>21<br>22<br>23<br>24<br>25<br>26<br>27<br>28<br>29<br>30<br>31<br>32<br>33<br>34<br>35<br>36<br>37<br>38<br>39<br>40<br>41<br>42<br>43<br>44<br>45<br>46 | <p>Seymour, J. 2007. 'Needs and preferences of patients with diseases other than cancer: The UK experience', <i>Progress in Palliative Care</i>, 15: 108-12.</p> <p>Shadmi, E., C. M. Boyd, C. J. Hsiao, M. Sylvia, A. B. Schuster, and C. Boulton. 2006. 'Morbidity and older persons' perceptions of the quality of their primary care', <i>Journal of the American Geriatrics Society</i>, 54: 330-34.</p> <p>Sherbourne, C. D., R. Sturm, and K. B. Wells. 1999. 'What outcomes matter to patients?', <i>J Gen Intern Med</i>, 14: 357-63.</p> <p>Shigaki, C. L., C. Moore, B. Wakefield, J. Campbell, and J. LeMaster. 2010. 'Nurse partners in chronic illness care: patients' perceptions and their implications for nursing leadership', <i>Nursing administration quarterly</i>, 34: 130-40.</p> <p>Shigemura, J., Y. Sato, A. Yoshino, and S. Nomura. 2008. 'Patient satisfaction with antidepressants: An Internet-based study', <i>Journal of Affective Disorders</i>, 107: 155-60.</p> <p>Sierra, J. A. I., and S. M. Calderon. 1997. 'Health and social services: Needs, preferences and their use by the elderly following hospitalisation. [Spanish]', <i>Revista Espanola de Salud Publica</i>, 71: 281-91.</p> <p>Singer, S. J., M. W. Friedberg, M. V. Kiang, T. Dunn, and D. M. Kuhn. 2013. 'Development and preliminary validation of the Patient Perceptions of Integrated Care survey', <i>Medical Care Research and Review</i>, 70: 143-64.</p> <p>Singh, Jasvinder A., Jeff A. Sloan, Pamela J. Atherton, Tenbroeck Smith, Thomas F. Hack, Mashele M. Huschka, Teresa A. Rummans, Matthew M. Clark, Brent Diekmann, and Lesley F. Degner. 2010. 'Preferred Roles in Treatment Decision Making Among Patients With Cancer: A Pooled Analysis of Studies Using the Control Preferences Scale', <i>American Journal of Managed Care</i>, 16: 688-96.</p> <p>Siouta, Eleni, Ulla Hellström Muhli, Berith Hedberg, Anders Broström, Björn Fossum, and Klas Karlgren. 2016. 'Patients' experiences of communication and involvement in decision-making about atrial fibrillation treatment in consultations with nurses and physicians', <i>Scandinavian Journal of Caring Sciences</i>, 30: 535-46.</p> <p>Skaperdas, E., A. Tuepker, C. Nicolaidis, J. K. Robb, D. Kansagara, and D. H. Hickam. 2014. 'Congestive heart failure self-management among US veterans: The role of personal and professional advocates', <i>Patient Educ Couns</i>, 95: 371-7.</p> <p>Skelton, A. M., E. A. Murphy, R. J. L. Murphy, and T. C. O'Dowd. 1996. 'Patients' views of low back pain and its management in general practice', <i>British Journal of General Practice</i>, 46: 153-56.</p> <p>Skilbeck, Julie Kathryn, Antony Arthur, and Jane Seymour. 2018. 'Making sense of frailty: An ethnographic study of the experience of older people living with complex health problems', <i>International Journal of Older People Nursing</i>, 13: 1-1.</p> <p>Slightam, C. A., K. Brandt, E. C. Jenchura, E. T. Lewis, S. M. Asch, and D. M. Zulman. 2018. '"I had to change so much in my life to live with my new limitations": Multimorbid patients' descriptions of their most bothersome chronic conditions', <i>Chronic Illness</i>, 14: 13-24.</p> | <p>Document type: Editorials &amp; reviews</p> <p>Outcome: Preferences not addressed</p> <p>Population: Age &lt;60 yrs.</p> <p>Outcome: Preferences not addressed</p> <p>Population: Age &lt;60 yrs.</p> <p>Population: Not multimorbid</p> <p>Population: Age &lt;60 yrs.</p> <p>Document type: Editorials &amp; reviews</p> <p>Population: Not multimorbid</p> <p>Outcome: Preferences not addressed</p> <p>Population: Age &lt;60 yrs.</p> <p>Outcome: Preferences not addressed</p> <p>Outcome: Preferences not addressed</p> |
|-------------------------------------------------------------------------------------------------------------------------------------------------------------------------------------------------------------------------------------------------------------------------|-------------------------------------------------------------------------------------------------------------------------------------------------------------------------------------------------------------------------------------------------------------------------------------------------------------------------------------------------------------------------------------------------------------------------------------------------------------------------------------------------------------------------------------------------------------------------------------------------------------------------------------------------------------------------------------------------------------------------------------------------------------------------------------------------------------------------------------------------------------------------------------------------------------------------------------------------------------------------------------------------------------------------------------------------------------------------------------------------------------------------------------------------------------------------------------------------------------------------------------------------------------------------------------------------------------------------------------------------------------------------------------------------------------------------------------------------------------------------------------------------------------------------------------------------------------------------------------------------------------------------------------------------------------------------------------------------------------------------------------------------------------------------------------------------------------------------------------------------------------------------------------------------------------------------------------------------------------------------------------------------------------------------------------------------------------------------------------------------------------------------------------------------------------------------------------------------------------------------------------------------------------------------------------------------------------------------------------------------------------------------------------------------------------------------------------------------------------------------------------------------------------------------------------------------------------------------------------------------------------------------------------------------------------------------------------------------------------------------------------------------------------------------------------------------------------------------------------------------------------------------------------------------------------------------------------------------------------------------------------------------------------------------------------------------------------------------------------------------------------------------------------------------------------------------------------------------------------------------------------------------------------------|-----------------------------------------------------------------------------------------------------------------------------------------------------------------------------------------------------------------------------------------------------------------------------------------------------------------------------------------------------------------------------------------------------------------------------------------------------------------------------------------------------------------------------------|



|                       |                                                                                                                                                                                                                                                                                                                                                                                                    |                                       |
|-----------------------|----------------------------------------------------------------------------------------------------------------------------------------------------------------------------------------------------------------------------------------------------------------------------------------------------------------------------------------------------------------------------------------------------|---------------------------------------|
| 1<br>2<br>3<br>4<br>5 | Snell, R., T. Langran, and P. Donyai. 2017. 'Patient views about polypharmacy medication review clinics run by clinical pharmacists in GP practices', <i>International Journal of Clinical Pharmacy</i> , 39: 1162-65.                                                                                                                                                                             | Outcome: Preferences not addressed    |
| 6<br>7<br>8           | Sobolewska, J., M. Szewczyk, M. Wlodarczyk, A. Sobolewska, J. Kasprzyk, L. Dziki, and A. Dziki. 2015. 'Patient perceptions of physician performing the digital rectal examination', <i>United European Gastroenterology Journal</i> , 1): A583.                                                                                                                                                    | Document type: Conference proceedings |
| 9<br>10<br>11         | Solberg, L. I., S. E. Asche, L. H. Anderson, K. Sepucha, N. M. Thygeson, J. E. Madden, L. Morrissey, and K. K. Kraemer. 2009. 'Evaluating preference-sensitive care for uterine fibroids: It's not so simple', <i>Journal of Women's Health</i> , 18: 1071-79.                                                                                                                                     | Population: Age <60 yrs.              |
| 12<br>13<br>14        | Soto-Perez-de-Celis, E., V. Perez-Montessoro, P. Rojo-Castillo, and Y. Chavarri-Guerra. 2018. 'Correction to: Health-Related Information-Seeking Behaviors and Preferences Among Mexican Patients with Cancer', <i>Journal of cancer education : the official journal of the American Association for Cancer Education</i> , 33: 510.                                                              | Population: Not multimorbid           |
| 15<br>16<br>17        | Sowerbutts, A. M., J. Griffiths, C. Todd, and K. Lavelle. 2015. 'Why are older women not having surgery for breast cancer? A qualitative study', <i>Psycho-Oncology</i> , 24: 1036-42.                                                                                                                                                                                                             | Population: Not multimorbid           |
| 18<br>19<br>20        | Stamm, A. W., J. S. Banerji, E. M. Wolff, A. Slee, S. Akapame, K. Dahl, D. M. John, M. C. Soung, K. R. Pittenger, and J. M. Corman. 2017. 'A decision aid versus shared decision making for prostate cancer screening results of a randomized, controlled trial', <i>Canadian Journal of Urology</i> , 24: 8910-17.                                                                                | Outcome: Preferences not addressed    |
| 21<br>22<br>23        | Stanek, E. J., M. B. Oates, W. F. McGhan, D. Denofrio, and E. Loh. 2000. 'Preferences for treatment outcomes in patients with heart failure: Symptoms versus survival', <i>Journal of Cardiac Failure</i> , 6: 225-32.                                                                                                                                                                             | Population: Age <60 yrs.              |
| 24<br>25<br>26        | Stegmann, M. E., J. Schuling, T. J. N. Hiltermann, A. K. L. Reyners, H. Burger, M. Y. Berger, and A. J. Berendsen. 2017. 'Study protocol for the OPTion randomised controlled trial on the effect of prioritising treatment goals among older patients with cancer in a palliative setting', <i>Maturitas</i> , 96: 84-88.                                                                         | Document type: Study protocols        |
| 27<br>28<br>29        | Sternke, E. A., K. Abrahamson, and M. J. Bair. 2016. 'Comorbid Chronic Pain and Depression: Patient Perspectives on Empathy', <i>Pain management nursing : official journal of the American Society of Pain Management Nurses</i> , 17: 363-71.                                                                                                                                                    | Population: Age <60 yrs.              |
| 30<br>31<br>32        | Stevenson, Lynne W., Anne S. Hellkamp, Carl V. Leier, George Sopko, Todd Koelling, J. Wayne Warnica, William T. Abraham, Edward K. Kasper, Joseph G. Rogers, Robert M. Califf, Elizabeth E. Schramm, and Christopher M. O'Connor. 2008. 'Changing Preferences for Survival After Hospitalization With Advanced Heart Failure', <i>Journal of the American College of Cardiology</i> , 52: 1702-08. | Population: Age <60 yrs.              |
| 33<br>34<br>35        | Stewart, M., M. Fortin, and Team Patient-Centred Innovations for Persons with Multimorbidity. 2017. 'Patient-Centred Innovations for Persons with Multimorbidity: funded evaluation protocol', <i>CMAJ open</i> , 5: E365-E72.                                                                                                                                                                     | Document type: Study protocols        |
| 36<br>37<br>38        | Stone, S. C., S. A. Mohanty, and C. D. McClung. 2010. 'Treatment preferences: Impact of risk and benefit in decision-making', <i>Journal of Palliative Medicine</i> , 13: 39-47.                                                                                                                                                                                                                   | Population: Age <60 yrs.              |

|                       |                                                                                                                                                                                                                                                                                                                                |                                                    |
|-----------------------|--------------------------------------------------------------------------------------------------------------------------------------------------------------------------------------------------------------------------------------------------------------------------------------------------------------------------------|----------------------------------------------------|
| 1<br>2<br>3<br>4<br>5 | Straand, J., and H. Sandvik. 2001. 'Stopping long-term drug therapy in general practice. How well do physicians and patients agree?', <i>Family Practice</i> , 18: 597-601.                                                                                                                                                    | Outcome: Preferences not addressed                 |
| 6<br>7<br>8           | Straton, J. B., N. Y. Wang, L. A. Meoni, D. E. Ford, M. J. Klag, D. Casarett, and J. J. Gallo. 2004. 'Physical functioning, depression, and preferences for treatment at the end of life: the Johns Hopkins Precursors Study', <i>Journal of the American Geriatrics Society</i> , 52: 577-82.                                 | Outcome: Preferences from physicians or caregivers |
| 9<br>10<br>11         | Street, H., M. O'Connor, and H. Robinson. 2007. 'Depression in older adults: exploring the relationship between goal setting and physical health', <i>International Journal of Geriatric Psychiatry</i> , 22: 1115-9.                                                                                                          | Outcome: Preferences not addressed                 |
| 12<br>13              | Sturgeon, K. M., C. Fisher, G. McShea, S. K. Sullivan, D. Sataloff, and K. H. Schmitz. 2018. 'Patient preference and timing for exercise in breast cancer care', <i>Supportive Care in Cancer</i> , 26: 507-14.                                                                                                                | Population: Age <60 yrs.                           |
| 14<br>15<br>16        | Subramanian, L., M. Quinn, J. Zhao, L. Lachance, J. Zee, and F. Tentori. 2017. 'Coping with kidney disease - qualitative findings from the Empowering Patients on Choices for Renal Replacement Therapy (EPOCH-RRT) study', <i>BMC Nephrology</i> , 18 (1) (no pagination).                                                    | Outcome: Preferences not addressed                 |
| 17<br>18              | <a href="https://ClinicalTrials.gov/show/NCT03525015">Sun Yat-sen, University. 2018. "Impact of a Printed Decision Aid on Cataract Surgery Choice." In.: https://ClinicalTrials.gov/show/NCT03525015.</a>                                                                                                                      | Population: Not multimorbid                        |
| 19<br>20<br>21        | Taheri, C., P. Panchal, T. Kakkar, N. Pattathil, and C. Kreamsoulas. 2016. 'Patient perspectives on cardiac care experiences differ according to gender', <i>Circulation</i> . Conference: American Heart Association's, 134.                                                                                                  | Document type: Conference proceedings              |
| 22<br>23              | Tai, W. T., F. W. Porell, and E. K. Adams. 2004. 'Hospital choice of rural Medicare beneficiaries: patient, hospital attributes, and the patient-physician relationship', <i>Health Services Research</i> , 39: 1903-22.                                                                                                       | Population: Not multimorbid                        |
| 24<br>25<br>26<br>27  | Takahara, M., T. Shiraiwa, N. Ogawa, M. Yamamoto, Y. Kusuda, M. Shindo, S. Hashio, N. Katakami, T. A. Matsuoka, and I. Shimomura. 2017. 'Patient perspectives on combination therapy of a once-weekly oral medication plus daily medication for lifestyle-related chronic diseases', <i>Internal Medicine</i> , 56: 615-20.    | Outcome: Preferences not addressed                 |
| 28<br>29<br>30        | Tamura, M. K., J. C. Tan, and A. M. O'Hare. 2012. 'Optimizing renal replacement therapy in older adults: A framework for making individualized decisions', <i>Kidney International</i> , 82: 261-69.                                                                                                                           | Document type: Editorials & reviews                |
| 31<br>32<br>33<br>34  | Tang, S. T., F. H. Wen, W. C. Chang, C. H. Hsieh, W. C. Chou, J. S. Chen, and M. M. Hou. 2017. 'Preferences for Life-Sustaining Treatments Examined by Hidden Markov Modeling Are Mostly Stable in Terminally Ill Cancer Patients' Last Six Months of Life', <i>Journal of Pain and Symptom Management</i> , 54: 628-+.        | Population: Age <60 yrs.                           |
| 35<br>36<br>37        | Tattersall, M. H. N., L. Venkateswaran, and G. Szonyi. 2012. 'Are age and self-reported health predictors of older incurable cancer patients' preferences for involvement in decisions about palliative chemotherapy and for receiving prognostic information?', <i>Asia-Pacific Journal of Clinical Oncology</i> , 3(3): 127. | Document type: Conference proceedings              |
| 38<br>39<br>40        | Taylor L.M., J. C. Spence, K. Raine, A. M. Sharma and R. C. Plotnikoff Self-reported physical activity preferences in individuals with prediabetes. <i>The Physician and Sportsmedicine</i> , 39:2, 41-49                                                                                                                      | Population: Age <60 yrs.                           |

|    |                                                                                                                                            |                                     |
|----|--------------------------------------------------------------------------------------------------------------------------------------------|-------------------------------------|
| 1  |                                                                                                                                            |                                     |
| 2  |                                                                                                                                            |                                     |
| 3  |                                                                                                                                            |                                     |
| 4  | Theile, G., and C. A. Muller. 2012. '[Multimorbid general practice patients - what's really important?]', <i>Praxis</i> , 101: 1621-6.     | Document type: Editorials & reviews |
| 5  | Thiem, U., G. Theile, U. Junius-Walker, S. Holt, P. Thurmann, T. Hinrichs, P. Platen, C. Diederichs, K. Berger, J. M. Hodek, W. Greiner,   |                                     |
| 6  | S. Berkemeyer, L. Pientka, and H. J. Trampisch. 2011. 'Prerequisites for a new health care model for elderly people with                   | Outcome: Preferences not addressed  |
| 7  | multimorbidity: the PRISCUS research consortium', <i>Zeitschrift fur Gerontologie und Geriatrie</i> , 44: 115-20.                          |                                     |
| 8  | Thomson, R. G., M. P. Eccles, I. N. Steen, Jrtsju Scheme, L. Stobbart, M. J. Murtagh, and C. R. May. 2007. 'A patient decision aid to      |                                     |
| 9  | support shared decision-making on anti-thrombotic treatment of patients with atrial fibrillation: randomised controlled trial',            | Population: Not multimorbid         |
| 10 | <i>Quality &amp; Safety in Health Care</i> , 16: 216-23.                                                                                   |                                     |
| 11 | Thorne, Sally, John L. Oliffe, and Kelli I. Stajduhar. 2013. 'Communicating shared decision-making: Cancer patient perspectives',          |                                     |
| 12 | <i>Patient Education and Counseling</i> , 90: 291-96.                                                                                      | Population: Not multimorbid         |
| 13 |                                                                                                                                            |                                     |
| 14 | Tickle, June. 2016. 'Relationships between advance care planning preferences, symptoms, and place of death in older adults with            |                                     |
| 15 | chronic lung disease', <i>Relationships Between Advance Care Planning Preferences, Symptoms &amp; Place of Death in Older Adults with</i>  | No full-text available              |
| 16 | <i>Chronic Lung Disease</i> : 1-1.                                                                                                         |                                     |
| 17 | Tierney, S., H. Elwers, C. Sange, M. Mamas, M. K. Rutter, M. Gibson, L. Neyses, and C. Deaton. 2011. 'What influences physical activity    |                                     |
| 18 | in people with heart failure?: a qualitative study', <i>Int J Nurs Stud</i> , 48: 1234-43.                                                 | Document type: Editorials & reviews |
| 19 |                                                                                                                                            |                                     |
| 20 | Timpel, P., C. Lang, J. Wens, J. C. Contel, A. Gilis-Januszewska, K. Kemple, P. E. Schwarz, and Grp Manage Care Study. 2017.               |                                     |
| 21 | 'Individualising Chronic Care Management by Analysing Patients' Needs - A Mixed Method Approach', <i>International Journal of</i>          | Population: Age <60 yrs.            |
| 22 | <i>Integrated Care</i> , 17: 12.                                                                                                           |                                     |
| 23 | Tinetti, M. E., J. Esterson, R. Ferris, P. Posner, and C. S. Blaum. 2016. 'Patient Priority-Directed Decision Making and Care for Older    |                                     |
| 24 | Adults with Multiple Chronic Conditions', <i>Clinics in Geriatric Medicine</i> , 32: 261-75.                                               | Document type: Editorials & reviews |
| 25 |                                                                                                                                            |                                     |
| 26 | Tinsel, I., A. Buchholz, W. Vach, A. Siegel, T. Durk, A. Buchholz, W. Niebling, and K. G. Fischer. 2013. 'Shared decision-making in        |                                     |
| 27 | antihypertensive therapy: a cluster randomised controlled trial', <i>BMC Family Practice</i> , 14: 135.                                    | Population: Not multimorbid         |
| 28 |                                                                                                                                            |                                     |
| 29 | Tomasovic Mrcela, N., J. A. Borovac, D. Vrdoljak, S. Grazio, A. Tikvica Luetic, and S. Tomek-Roksandic. 2015. 'When elders choose:         |                                     |
| 30 | Which factors could influence the decision-making among elderly in the selection of health tourism services?', <i>Medical Hypotheses</i> , | Document type: Editorials & reviews |
| 31 | 85: 898-904.                                                                                                                               |                                     |
| 32 | Tong, A., P. Sainsbury, S. Chadban, R. G. Walker, D. C. Harris, S. M. Carter, B. Hall, C. Hawley, and J. C. Craig. 2009. 'Patients'        |                                     |
| 33 | experiences and perspectives of living with CKD', <i>American Journal of Kidney Diseases</i> , 53: 689-700.                                | Population: Age <60 yrs.            |
| 34 |                                                                                                                                            |                                     |
| 35 | Tong, A., S. Jan, G. Wong, J. C. Craig, M. Irving, S. Chadban, A. Cass, N. Marren, and K. Howard. 2012. 'Patient preferences for the       |                                     |
| 36 | allocation of deceased donor kidneys for transplantation: A mixed methods study', <i>BMC Nephrology</i> , 13 (1) (no pagination).          | Population: Age <60 yrs.            |
| 37 |                                                                                                                                            |                                     |
| 38 | Topaz, Maxim. 2014. 'Developing a tool to support decisions on patient prioritization at admission to home health care', Ph.D.: 191        |                                     |
| 39 | p-91 p.                                                                                                                                    | Outcome: Preferences not addressed  |
| 40 |                                                                                                                                            |                                     |
| 41 |                                                                                                                                            |                                     |
| 42 |                                                                                                                                            |                                     |
| 43 |                                                                                                                                            |                                     |
| 44 |                                                                                                                                            |                                     |
| 45 |                                                                                                                                            |                                     |
| 46 |                                                                                                                                            |                                     |

|                                                                                                                                                                                                                                                                                                                                         |                                       |
|-----------------------------------------------------------------------------------------------------------------------------------------------------------------------------------------------------------------------------------------------------------------------------------------------------------------------------------------|---------------------------------------|
| Tordoff, J., K. Simonsen, W. M. Thomson, and P. T. Norris. 2010. "'It's just routine.'" A qualitative study of medicine-taking amongst older people in New Zealand', <i>Pharm World Sci</i> , 32: 154-61.                                                                                                                               | Outcome: Preferences not addressed    |
| Townsend, A., P. Adam, L. C. Li, M. McDonald, and C. L. Backman. 2013. 'Exploring eHealth Ethics and Multi-Morbidity: Protocol for an Interview and Focus Group Study of Patient and Health Care Provider Views and Experiences of Using Digital Media for Health Purposes', <i>JMIR Research Protocols</i> , 2: e38.                   | Document type: Study protocols        |
| Uldry, Emilie, Markus Schaefer, Alend Saadi, Valentin Rousson, and Nicolas Demartines. 2013. 'Patients' Preferences on Information and Involvement in Decision Making for Gastrointestinal Surgery', <i>World Journal of Surgery</i> , 37: 2162-71.                                                                                     | Population: Age <60 yrs.              |
| Valaker, Irene, Maj-Britt Råholm, Tone M. Norekvål, Svein Rotevatn, Bengt Fridlund, and Jan Erik Nordrehaug. 2017. 'Continuity of care after percutaneous coronary intervention: The patient's perspective across secondary and primary care settings', <i>European Journal of Cardiovascular Nursing</i> , 16: 444-52.                 | Population: Not multimorbid           |
| Van De Pol, M. H. J., C. R. M. G. Fluit, J. Lagro, D. Niessen, M. G. M. O. Rikkert, and A. L. M. Lagro-Janssen. 2015. 'Quality care provision for older people: An interview study with patients and primary healthcare professionals', <i>British Journal of General Practice</i> , 65: e500-e07.                                      | Population: Not multimorbid           |
| van de Pol, M. H. J., C. R. M. G. Fluit, J. Lagro, Y. H. P. Slaats, M. G. M. Olde Rikkert, and A. L. M. Lagro-Janssen. 2016. 'Expert and patient consensus on a dynamic model for shared decision-making in frail older patients', <i>Patient Education and Counseling</i> , 99: 1069-77.                                               | Outcome: Preferences not addressed    |
| van der Aa, M. J., J. R. van den Broeke, K. Stronks, and T. Plochg. 2017. 'Patients with multimorbidity and their experiences with the healthcare process: a scoping review', <i>J Comorb</i> , 7: 11-21.                                                                                                                               | Document type: Editorials & reviews   |
| van Dongen, J. J. J., M. de Wit, H. W. H. Smeets, E. Stoffers, M. A. van Bokhoven, and R. Daniels. 2017. "'They Are Talking About Me, but Not with Me": A Focus Group Study to Explore the Patient Perspective on Interprofessional Team Meetings in Primary Care', <i>Patient</i> , 10: 429-38.                                        | Population: Not multimorbid           |
| van Wijmen, M. P. S., H. R. W. Pasman, G. A. M. Widdershoven, and B. D. Onwuteaka-Philipsen. 2015. 'Continuing or forgoing treatment at the end of life? Preferences of the general public and people with an advance directive', <i>Journal of Medical Ethics</i> , 41: 599-606.                                                       | Population: Not multimorbid           |
| Vandermause, R., J. J. Neumiller, B. J. Gates, P. David, M. Altman, D. J. Healey, P. Benson, D. Sunwold, G. Burton, K. R. Tuttle, and C. F. Corbett. 2016. 'Preserving Self: Medication-Taking Practices and Preferences of Older Adults With Multiple Chronic Medical Conditions', <i>Journal of Nursing Scholarship</i> , 48: 533-42. | Outcome: Preferences not addressed    |
| Venkateswaran, L. P., M. Tattersall, G. Szonyi, L. Horvath, N. Wilcken, M. Wong, P. Butow, J. Jansen, and R. Hui. 2009. 'Participation preferences in decision-making in cancer treatment - The 'PREDICT' study', <i>Asia-Pacific Journal of Clinical Oncology</i> , 2): A201-A02.                                                      | Document type: Conference proceedings |
| Vermunt, N. P. C. A., M. Harmsen, G. P. Westert, M. G. M. Olde Rikkert, and M. J. Faber. 2017. 'Collaborative goal setting with elderly patients with chronic disease or multimorbidity: a systematic review', <i>BMC Geriatrics</i> , 17: 167.                                                                                         | Document type: Editorials & reviews   |

|                                                                                                                                                                                                                                                                                                                                                                                            |                                                    |
|--------------------------------------------------------------------------------------------------------------------------------------------------------------------------------------------------------------------------------------------------------------------------------------------------------------------------------------------------------------------------------------------|----------------------------------------------------|
| Vermunt, N. P., M. Harmsen, G. Elwyn, G. P. Westert, J. S. Burgers, M. G. Olde Rikkert, and M. J. Faber. 2018. 'A three-goal model for patients with multimorbidity: A qualitative approach', <i>Health Expectations</i> , 21: 528-38.                                                                                                                                                     | Outcome: Preferences from physicians or caregivers |
| Vermunt, Npca, G. P. Westert, M. G. M. Olde Rikkert, and M. J. Faber. 2018. 'Assessment of goals and priorities in patients with a chronic condition: a secondary quantitative analysis of determinants across 11 countries', <i>Scandinavian journal of primary health care</i> , 36: 80-88.                                                                                              | Outcome: Preferences not addressed                 |
| Vina, E. R., D. Ran, E. L. Ashbeck, M. Kaur, and C. K. Kwoh. 2017. 'Relationship Between Knee Pain and Patient Preferences for Joint Replacement: Health Care Access Matters', <i>Arthritis Care and Research</i> , 69: 95-103.                                                                                                                                                            | Population: Not multimorbid                        |
| Voigt, I., J. Wrede, H. Diederichs-Egidi, M. L. Dierks, E. Hummers-Pradier, and U. Junius-Walker. 2010. 'Prüfcheck: Patientenzentrierte behandlungsplanung mit älteren multimorbiden patienten: Methodik und design. = PrefCheck: Patient-centered treatment planning with older multimorbid patients. Method and design', <i>Zeitschrift für Gerontologie und Geriatrie</i> , 43: 303-09. | Outcome: Preferences not addressed                 |
| Vreugdenhil, G. 2018. 'Shared decision-making in palliative care: desires and facts', <i>Supportive Care in Cancer</i> , 26.                                                                                                                                                                                                                                                               | Document type: Editorials & reviews                |
| Walker, R. C., R. L. Morton, A. Tong, M. R. Marshall, S. Palmer, and K. Howard. 2015. 'Patient and caregiver preferences for home dialysis-the home first study: a protocol for qualitative interviews and discrete choice experiments', <i>BMJ Open</i> , 5: 6.                                                                                                                           | Document type: Study protocols                     |
| Wallner, L. P., Y. Li, A. K. C. Furgal, C. R. Friese, A. S. Hamilton, K. C. Ward, R. Jagsi, S. J. Katz, and S. T. Hawley. 2017. 'Patient preferences for primary care provider roles in breast cancer survivorship care', <i>Journal of Clinical Oncology</i> , 35: 2942-48.                                                                                                               | Population: Not multimorbid                        |
| Ward, L., and J. Draper. 2008. 'A review of the factors involved in older people's decision making with regard to influenza vaccination: A literature review', <i>Journal of Clinical Nursing</i> , 17: 5-16.                                                                                                                                                                              | Outcome: Preferences not addressed                 |
| Washington State, University, and Center Providence Medical Research. 2012. "Medication-taking Preferences & Practices of Patients With Chronic Conditions." In.: <a href="https://ClinicalTrials.gov/show/NCT01614353">https://ClinicalTrials.gov/show/NCT01614353</a> .                                                                                                                  | Ongoing study                                      |
| White, Carolynne, Primrose Lentin, and Louise Farnworth. 2016. 'Multimorbidity and the process of living with ongoing illness', <i>Chronic Illness</i> , 12: 83-97.                                                                                                                                                                                                                        | Population: Age <60 yrs.                           |
| Whitson, H. E., K. Steinhäuser, N. Ammarell, D. Whitaker, S. W. Cousins, D. Ansah, L. L. Sanders, and H. J. Cohen. 2011. 'Categorizing the effect of comorbidity: a qualitative study of individuals' experiences in a low-vision rehabilitation program', <i>Journal of the American Geriatrics Society</i> , 59: 1802-9.                                                                 | Outcome: Preferences not addressed                 |
| Wilkinson, C., M. Khanji, P. E. Cotter, O. Dunne, and S. T. O'Keefe. 2008. 'Preferences of acutely ill patients for participation in medical decision-making', <i>Quality &amp; Safety in Health Care</i> , 17: 97-100.                                                                                                                                                                    | Population: Not multimorbid                        |
| Williams, A. 2004. 'Patients with comorbidities: perceptions of acute care services', <i>Journal of Advanced Nursing</i> , 46: 13-22.                                                                                                                                                                                                                                                      | Outcome: Preferences not addressed                 |
| Williams, A., and E. Manias. 2014. 'Exploring motivation and confidence in taking prescribed medicines in coexisting diseases: a qualitative study', <i>J Clin Nurs</i> , 23: 471-81.                                                                                                                                                                                                      | Outcome: Preferences not addressed                 |

|                                                                                                                                                                                                                                                                                                                                                                                                         |                                                    |
|---------------------------------------------------------------------------------------------------------------------------------------------------------------------------------------------------------------------------------------------------------------------------------------------------------------------------------------------------------------------------------------------------------|----------------------------------------------------|
| Williams, B., A. Shaw, R. Durrant, I. Crinson, C. Pagliari, and S. de Lusignan. 2005. 'Patient perspectives on multiple medications versus combined pills: A qualitative study', <i>QJM - Monthly Journal of the Association of Physicians</i> , 98: 885-93.                                                                                                                                            | Outcome: Preferences not addressed                 |
| Wilson, D. M., and S. Birch. 2018. 'A scoping review of research to assess the frequency, types, and reasons for end-of-life care setting transitions', <i>Scand J Public Health</i> : 1403494818785042.                                                                                                                                                                                                | Outcome: Preferences not addressed                 |
| Winter, L., M. P. Lawton, and K. Ruckdeschel. 2003. 'Preferences for prolonging life: A prospect theory approach', <i>International Journal of Aging &amp; Human Development</i> , 56: 155-70.                                                                                                                                                                                                          | Population: Not multimorbid                        |
| Winter, Laraine, and Barbara Parker. 2007. 'Current health and preferences for life-prolonging treatments: An application of prospect theory to end-of-life decision making', <i>Social Science &amp; Medicine</i> , 65: 1695-707.                                                                                                                                                                      | Population: Not multimorbid                        |
| Wittink, M. N., P. Walsh, S. Yilmaz, M. Mendoza, R. L. Street, B. P. Chapman, and P. Duberstein. 2018. 'Patient priorities and the doorknob phenomenon in primary care: Can technology improve disclosure of patient stressors?', <i>Patient Education and Counseling</i> , 101: 214-20.                                                                                                                | Population: Age <60 yrs.                           |
| Woda, A., R. A. Belknap, K. Haglund, M. Sebern, and A. Lawrence. 2015. 'Factors influencing self-care behaviors of African Americans with heart failure: a photovoice project', <i>Heart Lung</i> , 44: 33-8.                                                                                                                                                                                           | Outcome: Preferences not addressed                 |
| Wrede, J., I. Voigt, J. Bleidorn, E. Hummers-Pradier, M. L. Dierks, and U. Junius-Walker. 2013. 'Complex health care decisions with older patients in general practice: Patient-centeredness and prioritization in consultations following a geriatric assessment', <i>Patient Education and Counseling</i> , 90: 54-60.                                                                                | Outcome: Preferences from physicians or caregivers |
| Xu, Y., L. Sudharshan, M. A. Hsu, A. Koenig, J. C. Cappelleri, W. Liu, T. Smith, and M. Pasquale. 2017. 'Patient preferences associated with the use of treatments for psoriatic arthritis: Results of a conjoint analysis', <i>Arthritis and Rheumatology</i> . Conference: American College of Rheumatology/Association of Rheumatology Health Professionals Annual Scientific Meeting, ACR/ARHP, 69. | Population: Not multimorbid                        |
| Xue, A., S. Mincer, K. Domino, and K. Posner. 2015. 'Predictors of control preferences in the pre-anesthesia clinic', <i>Journal of Investigative Medicine</i> , 63 (1): 199.                                                                                                                                                                                                                           | Document type: Conference proceedings              |
| Yi, D., M. Ryan, S. Campbell, A. Elliott, N. Torrance, A. Chambers, M. Johnston, P. Hannaford, and B. H. Smith. 2011. 'Using discrete choice experiments to inform randomised controlled trials: an application to chronic low back pain management in primary care', <i>European Journal of Pain</i> , 15: 531.e1-10.                                                                                  | Population: Age <60 yrs.                           |
| Youssef, A. T., R. Constantino, Z. K. Chaudhary, A. Lee, D. Wiljer, M. Mylopoulos, and S. Sockalingam. 2017. 'Mapping Evidence of Patients' Experiences in Integrated Care Settings: A Protocol for a Scoping Review', <i>BMJ Open</i> , 7: e018311.                                                                                                                                                    | Document type: Study protocols                     |
| Youssef, E., V. Cooper, A. Miners, C. Llewellyn, A. Pollard, M. Lagarde, M. Sachikonye, C. Sabin, C. Foreman, N. Perry, E. Nixon, and M. Fisher. 2016. 'Understanding HIV-positive patients' preferences for healthcare services: A protocol for a discrete choice experiment', <i>BMJ Open</i> , 6 (7) (no pagination).                                                                                | Population: Age <60 yrs.                           |

1  
2  
3  
4  
5  
6  
7  
8  
9  
10  
11  
12  
13  
14  
15  
16  
17  
18  
19  
20  
21  
22  
23  
24  
25  
26  
27  
28  
29  
30  
31  
32  
33  
34  
35  
36  
37  
38  
39  
40  
41  
42  
43  
44  
45  
46

|                                                                                                                                                                                                                                                                                                                                                                              |                                       |
|------------------------------------------------------------------------------------------------------------------------------------------------------------------------------------------------------------------------------------------------------------------------------------------------------------------------------------------------------------------------------|---------------------------------------|
| Yu, C. H., D. Stacey, J. Sale, S. Hall, D. M. Kaplan, N. Ivers, J. Rezmovitz, F. H. Leung, B. R. Shah, and S. E. Straus. 2014. 'Designing and evaluating an interprofessional shared decision-making and goal-setting decision aid for patients with diabetes in clinical care--systematic decision aid development and study protocol', Implementation science : IS, 9: 16. | Duplicates                            |
| Yu, C. H., N. M. Ivers, D. Stacey, J. Rezmovitz, D. Telner, K. Thorpe, S. Hall, M. Settino, D. M. Kaplan, M. Coons, S. Sodhi, J. Sale, and S. E. Straus. 2015. 'Impact of an interprofessional shared decision-making and goal-setting decision aid for patients with diabetes on decisional conflict--study protocol for a randomized controlled trial', 16: 286.           | Document type: Study protocols        |
| Zarrin, S., K. Patel, N. Thompson, I. Maravilla, and C. Ritchie. 2017. 'Can't teach an older dog new tricks? : CComparing goal setting and completion among younger and older adults with multiple chronic conditions', Journal of the American Geriatrics Society, 65 (Supplement 1): S216-S17.                                                                             | Document type: Conference proceedings |
| Zijlstra, T. J., S. J. Leenman-Dekker, H. K. E. Oldenhuis, H. E. P. Bosveld, and A. J. Berendsen. 2016. 'Knowledge and preferences regarding cardiopulmonary resuscitation: A survey among older patients', Patient Education and Counseling, 99: 160-63.                                                                                                                    | Population: Not multimorbid           |

**Table S1. Preferred Reporting Items for Systematic reviews and Meta-Analyses extension for Scoping Reviews (PRISMA-ScR) Checklist**

| SECTION                           | ITEM | PRISMA-ScR CHECKLIST ITEM                                                                                                                                                                                                                                                 | REPORTED ON PAGE #      |
|-----------------------------------|------|---------------------------------------------------------------------------------------------------------------------------------------------------------------------------------------------------------------------------------------------------------------------------|-------------------------|
| <b>TITLE</b>                      |      |                                                                                                                                                                                                                                                                           |                         |
| Title                             | 1    | Identify the report as a scoping review.                                                                                                                                                                                                                                  | Page 1                  |
| <b>ABSTRACT</b>                   |      |                                                                                                                                                                                                                                                                           |                         |
| Structured summary                | 2    | Provide a structured summary that includes (as applicable): background, objectives, eligibility criteria, sources of evidence, charting methods, results, and conclusions that relate to the review questions and objectives.                                             | Pages 5-6               |
| <b>INTRODUCTION</b>               |      |                                                                                                                                                                                                                                                                           |                         |
| Rationale                         | 3    | Describe the rationale for the review in the context of what is already known. Explain why the review questions/objectives lend themselves to a scoping review approach.                                                                                                  | Pages 8-9               |
| Objectives                        | 4    | Provide an explicit statement of the questions and objectives being addressed with reference to their key elements (e.g., population or participants, concepts, and context) or other relevant key elements used to conceptualise the review questions and/or objectives. | Page 9                  |
| <b>METHODS</b>                    |      |                                                                                                                                                                                                                                                                           |                         |
| Protocol and registration         | 5    | Indicate whether a review protocol exists; state if and where it can be accessed (e.g., a web address); and if available, provide registration information, including the registration number.                                                                            | Page 6                  |
| Eligibility criteria              | 6    | Specify characteristics of the sources of evidence used as eligibility criteria (e.g., years considered, language, and publication status), and provide a rationale.                                                                                                      | Pages 10-11             |
| Information sources*              | 7    | Describe all information sources in the search (e.g., databases with dates of coverage and contact with authors to identify additional sources), as well as the date the most recent search was executed.                                                                 | Page 9-10               |
| Search                            | 8    | Present the full electronic search strategy for at least 1 database, including any limits used, such that it could be repeated.                                                                                                                                           | Page 10; Suppl table 2. |
| Selection of sources of evidence† | 9    | State the process for selecting sources of evidence (i.e., screening and eligibility) included in the scoping review.                                                                                                                                                     | Page 10-11              |
| Data charting process‡            | 10   | Describe the methods of charting data from the included sources of evidence (e.g., calibrated forms, or forms that were tested by the team before being used, and whether data charting was done independently or in                                                      | Page 10                 |



| SECTION                                              | ITEM | PRISMA-ScR CHECKLIST ITEM                                                                                                                                                                                   | REPORTED ON PAGE #                |
|------------------------------------------------------|------|-------------------------------------------------------------------------------------------------------------------------------------------------------------------------------------------------------------|-----------------------------------|
|                                                      |      | duplicate) and any processes for obtaining and confirming data from investigators.                                                                                                                          |                                   |
| Data items                                           | 11   | List and define all variables for which data were sought and any assumptions and simplifications made.                                                                                                      | Page 11                           |
| Critical appraisal of individual sources of evidence | 12   | If applicable, provide a rationale for conducting a critical appraisal of included sources of evidence; describe the methods used and how this information was used in any data synthesis (if appropriate). | Not applicable                    |
| Synthesis of results                                 | 13   | Describe the methods of dealing with and summarising the data that were charted.                                                                                                                            | Page 11-12                        |
| <b>RESULTS</b>                                       |      |                                                                                                                                                                                                             |                                   |
| Selection of sources of evidence                     | 14   | Give numbers of sources of evidence screened, assessed for eligibility, and included in the review, with reasons for exclusions at each stage, ideally using a flow diagram.                                | Page 12; Suppl table 3, Figure 1. |
| Characteristics of sources of evidence               | 15   | For each source of evidence, present characteristics for which data were charted and provide the citations.                                                                                                 | Page 12; Table 1.                 |
| Critical appraisal within sources of evidence        | 16   | If done, present data on critical appraisal of included sources of evidence (see item 12).                                                                                                                  | Not applicable                    |
| Results of individual sources of evidence            | 17   | For each included source of evidence, present the relevant data that were charted that relate to the review questions and objectives.                                                                       | Pages 13-16; Tables 2 and 3.      |
| Synthesis of results                                 | 18   | Summarise and/or present the charting results as they relate to the review questions and objectives.                                                                                                        | Pages 13-16; Figure 2             |
| <b>DISCUSSION</b>                                    |      |                                                                                                                                                                                                             |                                   |
| Summary of evidence                                  | 19   | Summarise the main results (including an overview of concepts, themes, and types of evidence available), link to the review questions and objectives, and consider the relevance to key groups.             | Pages 16-18                       |
| Limitations                                          | 20   | Discuss the limitations of the scoping review process.                                                                                                                                                      | Page 19                           |
| Conclusions                                          | 21   | Provide a general interpretation of the results with respect to the review questions and objectives, as well as potential implications and/or next steps.                                                   | Page 20                           |
| <b>FUNDING</b>                                       |      |                                                                                                                                                                                                             |                                   |
| Funding                                              | 22   | Describe sources of funding for the included sources of evidence, as well as sources of funding for the scoping review. Describe the role of the funders of the scoping review.                             | Page 41                           |

JBI = Joanna Briggs Institute; PRISMA-ScR = Preferred Reporting Items for Systematic reviews and Meta-Analyses extension for Scoping Reviews.

1  
2  
3 \* Where *sources of evidence* (see second footnote) come from, such as bibliographic  
4 databases, social media platforms, and Web sites.

5 † A more inclusive/heterogeneous term used to account for the different types of evidence or  
6 data sources (e.g., quantitative and/or qualitative research, expert opinion, and policy  
7 documents) that may be eligible for inclusion in a scoping review as opposed to only studies.  
8 This is not to be confused with *information sources* (see first footnote).

9 ‡ The frameworks by Arksey and O'Malley (6) and Levac and colleagues (7) and the JBI  
10 guidance (4, 5) refer to the process of data extraction in a scoping review as data charting.

11 § The process of systematically examining research evidence to assess its validity, results, and  
12 relevance before using it to inform a decision. This term is used for items 12 and 19 instead of  
13 "risk of bias" (which is more applicable to systematic reviews of interventions) to include and  
14 acknowledge the various sources of evidence that may be used in a scoping review (e.g.,  
15 quantitative and/or qualitative research, expert opinion, and policy document).  
16  
17  
18  
19

20  
21 *From:* Tricco AC, Lillie E, Zarin W, O'Brien KK, Colquhoun H, Levac D, et al. PRISMA Extension  
22 for Scoping Reviews (PRISMA-ScR): Checklist and Explanation. *Ann Intern Med.*169:467–473.  
23 doi: 10.7326/M18-0850  
24  
25  
26  
27  
28  
29  
30  
31  
32  
33  
34  
35  
36  
37  
38  
39  
40  
41  
42  
43  
44  
45  
46  
47  
48  
49  
50  
51  
52  
53  
54  
55  
56  
57  
58  
59  
60
