# Supplementary material for: Health-related preferences of older patients with multimorbidity: an evidence map
Source: PubMed Central journal article supplement — BMJ Open. 2019 Dec 15;9(12):e034485. doi: 10.1136/bmjopen-2019-034485 (PMC6924802; doi:10.1136/bmjopen-2019-034485), 2019-12-15
Supplement: bmjopen-2019-034485supp002.pdf [file bmjopen-2019-034485supp002.pdf]

1 **Table S2. Search strategy used for MEDLINE database (search interface: Ovid; Host: Wolters Kluwer)**

2 MEDLINE 1946 to the third week of April, 2018,

3 MEDLINE Daily Update April 26, 2018,

4 MEDLINE In-Process & Other Non-Indexed Citations April 26, 2018,

5 MEDLINE Epub Ahead of Print April 26, 2018

6 Search date (yyyy-mm-dd): 2018-04-27

| #  | Searches                                                                                                                             | Results | Annotations                          |
|----|--------------------------------------------------------------------------------------------------------------------------------------|---------|--------------------------------------|
| 1  | exp aged/                                                                                                                            | 2800655 | #1 to #8:<br>Aspect Aged             |
| 2  | Geriatrics/                                                                                                                          | 28648   |                                      |
| 3  | (old*3 adj2 (adult*2 or people or person* or patient* or age*2 or man or men or wom#n or client* or residen*)).ti,ab,kf.             | 551680  |                                      |
| 4  | (elder* or geriat* or geronto* or frail* or senior? or agedly).ti,ab,kf.                                                             | 314577  |                                      |
| 5  | (high*3 age*2 or late* life* or late* live*).ti,ab,kf.                                                                               | 21918   |                                      |
| 6  | ((liv* or life*) adj2 long*3 adj2 (adult* or people or person* or patient* or man or men or wom?n or client* or residen*)).ti,ab,kf. | 2540    |                                      |
| 7  | advanced in years.ti,ab,kf. or betagt*.ot.                                                                                           | 162     |                                      |
| 8  | or/1-7                                                                                                                               | 3248520 |                                      |
| 9  | comorbidity/                                                                                                                         | 92917   | #9 to #21:<br>Aspect Multi-morbidity |
| 10 | Multiple Chronic Conditions/                                                                                                         | 178     |                                      |
| 11 | exp chronic disease/ and (multi or multiple or concurren* or complex*).ti,ab,kf.                                                     | 20443   |                                      |

|    |                                                                                                            |        |                                             |
|----|------------------------------------------------------------------------------------------------------------|--------|---------------------------------------------|
| 12 | (comorbid* or co-morbid*).ti,ab,kf,ot. or (komorbid* or ko-morbid*).ot.                                    | 140228 |                                             |
| 13 | (multimorbid* or multi*-morbid*).ti,ab,kf,ot.                                                              | 4057   |                                             |
| 14 | (polymorbid* or poly morbid*).ti,ab,kf,ot.                                                                 | 292    |                                             |
| 15 | multidisease*.ti,ab,kf.                                                                                    | 39     |                                             |
| 16 | ((multi or multiple) adj2 (ill or illness* or condition* or disorder* or syndrom* or disease*)).ti,ab,kf.  | 30204  |                                             |
| 17 | (complex* adj2 (patient* or disease* or ill or illness* or condition* or disorder*)).ti,ab,kf.             | 42426  |                                             |
| 18 | (concurrent* adj2 (disease* or ill or illness* or condition* or disorder*)).ti,ab,kf.                      | 4305   |                                             |
| 19 | (multimedica* or multi*-medica* or polymedica* or poly-medica* or polypharmac* or poly-pharmac*).ti,ab,kf. | 8133   |                                             |
| 20 | Polypharmacy/                                                                                              | 3790   |                                             |
| 21 | or/9-20                                                                                                    | 297020 |                                             |
| 22 | 8 and 21                                                                                                   | 110795 | Aged AND Multi-morbidity                    |
| 23 | exp patient centered care/                                                                                 | 16400  | #23 to #49:<br>Aspect patient-centered care |
| 24 | exp patient satisfaction/                                                                                  | 78556  |                                             |
| 25 | decision making/                                                                                           | 83248  |                                             |
| 26 | choice behaviour/                                                                                          | 28960  |                                             |
| 27 | Health Priorities/                                                                                         | 10119  |                                             |
| 28 | ((patient? or client? or person*2) adj2 prefer*).ti,ab,kf.                                                 | 18606  |                                             |

|    |                                                                                         |       |  |
|----|-----------------------------------------------------------------------------------------|-------|--|
| 29 | ((patient? or client? or person*2) adj2 priorit*).ti,ab,kf.                             | 2490  |  |
| 30 | (treatment adj2 (goal? or preference? or priorit*)).ti,ab,kf.                           | 11750 |  |
| 31 | goal attainment.ti,ab,kf.                                                               | 1550  |  |
| 32 | (goal oriented* or goaloriented*).ti,ab,kf.                                             | 1425  |  |
| 33 | goals/                                                                                  | 14804 |  |
| 34 | (patient cent* adj2 (care or approach* or therap* or treatment or medic*)).ti,ab,kf.    | 9128  |  |
| 35 | (person cent* adj2 (care or approach* or therap* or treatment or medic*)).ti,ab,kf.     | 2349  |  |
| 36 | (client cent* adj2 (care or approach* or therap* or treatment or medic*)).ti,ab,kf.     | 556   |  |
| 37 | (patient oriented adj2 (care or approach* or therap* or treatment or medic*)).ti,ab,kf. | 375   |  |
| 38 | (person oriented adj2 (care or approach* or therap* or treatment or medic*)).ti,ab,kf.  | 114   |  |
| 39 | (client oriented adj2 (care or approach* or therap* or treatment or medic*)).ti,ab,kf.  | 19    |  |
| 40 | (patient cent?redness or client cent?redness or person cent?redness).ti,ab,kf.          | 1408  |  |
| 41 | (patientcent* or clientcent* or personcent*).ti,ab,kf.                                  | 24    |  |
| 42 | (patientoriented* or clientoriented* or personoriented*).ti,ab,kf.                      | 4     |  |

|    |                                                                                                                                  |        |                                                                 |
|----|----------------------------------------------------------------------------------------------------------------------------------|--------|-----------------------------------------------------------------|
| 43 | ((patient*orientier* or klient*orientier* or patient*zentrier* or klient*zentrier* or person*orientier* or person*zentrier*).ot. | 179    |                                                                 |
| 44 | ((patient* or klient* or person*) adj (zentrier* or orientier*)).ot.                                                             | 24     |                                                                 |
| 45 | ((goal* or priorit* or target* or value* or preference*) adj2 (patient* or individual* or person* or client*)).ti,ab,kf.         | 63093  |                                                                 |
| 46 | ((goal* or priorit* or target* or preference*) adj2 treatment*).ti,ab,kf.                                                        | 32182  |                                                                 |
| 47 | ((patient* or client* or person*) adj2 choice*).ti,ab,kf.                                                                        | 9970   |                                                                 |
| 48 | shared decision making.ti,ab,kf.                                                                                                 | 5495   |                                                                 |
| 49 | or/23-48                                                                                                                         | 326625 |                                                                 |
| 50 | 22 and 49                                                                                                                        | 4208   | Aged AND Multi-morbidity AND patient-centered care              |
| 51 | protocol.ti.                                                                                                                     | 35122  | Textword protocol in title                                      |
| 52 | 21 and 49 and 51                                                                                                                 | 89     | Multi-morbidity AND patient-centered care AND protocol in title |
| 53 | 50 or 52                                                                                                                         | 4259   | (Aged AND Multi-morbidity AND patient-centred care)<br>OR       |

|    |                           |         |                                                                  |
|----|---------------------------|---------|------------------------------------------------------------------|
|    |                           |         | (Multi-morbidity AND patient-centred care AND protocol in title) |
| 54 | exp animals/ not humans/  | 4450254 | Exclusion of animals                                             |
| 55 | 53 not 54                 | 4258    |                                                                  |
| 56 | case reports.pt.          | 1875801 | Exclusion of editorials and case reports                         |
| 57 | (case? adj3 report).ti.   | 302363  |                                                                  |
| 58 | editorial.pt.             | 456208  |                                                                  |
| 59 | editorial.ti.             | 34313   |                                                                  |
| 60 | or/56-59                  | 2443711 |                                                                  |
| 61 | 55 not 60                 | 4111    |                                                                  |
| 62 | remove duplicates from 61 | 4080    | Exclusion of duplicates.<br><b>Final result</b>                  |

7

8 / = Medical Subject Heading (MeSH)

9 Exp = exploded Mesh term

10 \* = truncation, any number of characters

11 \*2, \*3 = truncation: from 0 to 2, 0 to 3 characters

12 ? = 0 or 1 character

13 # = 1 character

14 .ti,ab,kf. = title, abstract, keyword heading word

15 .ti. = title

16 .ot. = original title

- 17 .mp. = title, abstract, original title, name of substance word, subject heading word, keyword heading
- 18 word, protocol supplementary concept word, rare disease supplementary concept word, unique
- 19 identifier
- 20 .pt. = publication type
- 21 *adjn* = Search terms within *n* words in any order
- 22
- 23
- 24
- 25
