# Supplementary material for: Health-related preferences of older patients with multimorbidity: an evidence map
Source: PubMed Central journal article supplement — BMJ Open. 2019 Dec 15;9(12):e034485. doi: 10.1136/bmjopen-2019-034485 (PMC6924802; doi:10.1136/bmjopen-2019-034485), 2019-12-15
Supplement: bmjopen-2019-034485supp003.pdf [file bmjopen-2019-034485supp003.pdf]

**Table S3. Key characteristics of the included studies.****Table S3a. Key characteristics – Qualitative cross-sectional studies**

| Source              | Study methods                                                                                                                                                          |                                                |                 | Patient population                       |                 |                       |                 |
|---------------------|------------------------------------------------------------------------------------------------------------------------------------------------------------------------|------------------------------------------------|-----------------|------------------------------------------|-----------------|-----------------------|-----------------|
|                     | Study aim                                                                                                                                                              | Setting, country                               | Data collection | Def of MM                                | Sample (number) | Age: Mean (SD); range | Sex (% females) |
| Bayliss, 2008 (136) | To explore processes of care desired by elderly patients with MM, and that may present competing demands for patients and providers                                    | Population based; USA                          | ssl (f2f)       | ≥ 2 chronic conditions                   | 26              | 65-84                 | 50              |
| Belcher, 2006 (134) | To explore the views of older adults regarding participation in medication decision-making                                                                             | GP & Hospital (outpatient) & Nursing home; USA | ssl (f2f)       | ≥ 2 chronic conditions + ≥ 1 medications | 51              | 77; 65-89             | 63              |
| Beverly, 2008 (94)  | To define, identify, and rank the values and preferences that older adults express in their diabetes care                                                              | Population based; USA                          | FG              | Type 2 diabetes + ≥ 1 comorbidity        | 35              | 75; 60-88             | 57              |
| Beverly, 2011 (95)  | To explore the perceived impact of chronic co-morbid conditions on type 2 diabetes self-management in older patients                                                   | Population based; USA                          | FG              | Type 2 diabetes + ≥ 1 comorbidity        | 32              | 75 (7); 60-88         | 56              |
| Bower, 2012 (96)    | To examine patients' representations of multimorbid long-term conditions and assess how models of illness representation might need modification in the presence of MM | GP; UK                                         | ssl (f2f)       | ≥ 2 chronic conditions                   | 28              | Median 66; 39-89      | 43              |
| Bravo, 2017 (125)   | To identify typologies of decision-making with foreign-born Latino elders with MM who have enrolled in an integrative geriatric health care program                    | Nursing home; USA                              | ssl (f2f)       | ≥ 2 chronic conditions                   | 13              | 75; 65-85             | 77              |
| Brown, 2007 (104)   | To describe how goals for the self-management of hypertension are developed and whether or not they conform to the characteristics of effective goal-setting           | Hospital (outpatient); USA                     | l (f2f)         | Hypertension + comorbidities             | 30              | 70 (9); 50-87         | 100             |

|                            |                                                                                                                                                                                                                                                                     |                                  |                |                                                                   |    |                        |    |
|----------------------------|---------------------------------------------------------------------------------------------------------------------------------------------------------------------------------------------------------------------------------------------------------------------|----------------------------------|----------------|-------------------------------------------------------------------|----|------------------------|----|
| Browne, 2014 (137)         | To examine patient, carer, and professional perspectives on current management of advanced CHF, as well as barriers and facilitators to improved care                                                                                                               | GP & Hospital (inpatient); UK    | FG & ssl (f2f) | CHF (severe)                                                      | 30 | 72; 60-86              | 27 |
| Caldwell, 2007 (39)        | To identify the preferences of patients with advanced CHF regarding communication about their prognosis and its implications                                                                                                                                        | Hospital (outpatient); Canada    | I (f2f)        | CHF (severe)                                                      | 20 | 68; 50-84              | 30 |
| Caughey, 2017 (108)        | To examine how older patients with MM and clinicians balance benefits and harms associated with a medication and in the presence of competing health outcomes                                                                                                       | Hospital (outpatient); Australia | I (f2f)        | ≥2 chronic conditions                                             | 15 | Median; IQR: 79; 73-86 | 53 |
| Cheraghi-Sohi, 2013 a (97) | To explore how patients prioritise their osteoarthritis among all their conditions, which factors underlie this prioritisation, and whether and why these priorities change over time                                                                               | Hospital (outpatient); UK        | 2a             | ≥ 2 chronic conditions<br>Osteoarthritis                          | 30 | 69; 55-86              | 60 |
| Cheraghi-Sohi, 2013 b (98) | To explore how and why people with MM prioritise some long-term conditions over others, what the potential implications may be for self-management activity, and, in turn, suggest how such information may help clinicians negotiate the management of MM patients | GP; UK                           | 2a             | ≥ 2 chronic conditions<br>Osteoarthritis                          | 41 | 68; 39-83              | 44 |
| Clover, 2004 (51)          | To report on a study exploring patients' understanding of their discussions about end-of-life care with nurses in a palliative care setting                                                                                                                         | Hospital (outpatient); Australia | I (f2f)        | Terminal illness                                                  | 11 | 74; 57-85              | 36 |
| DiNapoli, 2016 (106)       | To explore middle-aged and older veterans' current disease-management practices, mental health treatment preferences, and challenges they face in living with MM                                                                                                    | GP; USA                          | ssl (f2f)      | ≥2 score (cumulative Illness Rating Scale for Geriatrics)         | 28 | 64 (6)                 | 21 |
| Ekdahl, 2010 (128)         | To deepen the knowledge of frail elderly patients' preferences for participation in medical decision-making during hospitalisation                                                                                                                                  | Hospital (inpatient); Sweden     | ssl (f2f)      | ≥ 3 chronic conditions                                            | 15 | 84; 75-96              | 67 |
| Etkind, 2017 (170)         | To understand patient experiences of uncertainty in advanced illness and develop a typology of patients' responses and preferences to inform practice                                                                                                               | Hospital (outpatient); UK        | 2a             | Seriously ill patients<br>CHF, COPD, CKD, liver disease or cancer | 30 | 75; 43-95              | 40 |

|                       |                                                                                                                                                                                                                                  |                                            |                |                                                                 |    |                                                     |    |
|-----------------------|----------------------------------------------------------------------------------------------------------------------------------------------------------------------------------------------------------------------------------|--------------------------------------------|----------------|-----------------------------------------------------------------|----|-----------------------------------------------------|----|
| Fix, 2014 (92)        | To understand barriers to hypertension self-management in patients with hypertension and comorbidities                                                                                                                           | GP; USA                                    | ssl (f2f)      | Hypertension + $\geq 1$ comorbidity                             | 48 | 60 (10)                                             | 10 |
| Fried, 2003 (151)     | To elicit from patients themselves the aspects of treatment decision-making that are most important to them when making end-of-life treatment decisions                                                                          | Hospital (outpatient); USA                 | FG & ssl (f2f) | Seriously ill patients CHF, COPD, CKD or cancer                 | 23 | 70; 60-84                                           | 35 |
| Fried, 2008 (53)      | To examine the ways in which older persons with MM think about potentially competing outcomes in order to gain insight into how processes to elicit values regarding these outcomes can be grounded in the patient's perspective | Community; USA                             | FG             | $\geq 5$ medications                                            | 66 | 75 (6)                                              | 67 |
| Green, 2015 (115)     | To examine older adults' attitudes towards ICD implantation in the context of competing health risks and to explore the determinants of ICD decision-making among a group of patients who had faced the decision in the past     | Hospital (outpatient); USA                 | ssl (tel.)     | ICD + comorbidities + Geriatric syndromes mean (SD): 6.9 (2.7). | 44 | 78 (5)                                              | 29 |
| Gross, 2015 (161)     | To understand how older persons with MM approach decisions about cancer screening                                                                                                                                                | Hospital (outpatient), USA                 | ssl (f2f)      | $\geq 2$ chronic conditions + $\geq 5$ medications              | 28 | 65-75: 57%<br>76-85: 4%<br>>86: 21%<br>Unknown: 18% | 82 |
| Hansen, 2015 (99)     | To identify reasons for disagreement between patients and their GPs on illnesses                                                                                                                                                 | GP; Germany                                | FG             | $\geq 3$ chronic conditions                                     | 21 | 77; 70-88                                           | 48 |
| Haverhals, 2011 (100) | To understand the medication self-management issues faced by older adults and caregivers that can be addressed by an electronic personal health application                                                                      | Hospital (outpatient) & Nursing homes; USA | FG & ssl (f2f) | $\geq 2$ chronic condition + $\geq 3$ medications               | 32 | 82; 73-90                                           | 60 |
| Huang, 2005 (55)      | To explore self-reported healthcare goals, factors influencing these goals, and self-care practices of older patients with diabetes mellitus                                                                                     | GP; USA                                    | ssl (f2f)      | T2 diabetes + hypertension or hypercholesterolemia              | 28 | 74; 65-88                                           | 57 |

|                       |                                                                                                                                                                                                                                   |                                                        |                |                                                   |    |                                |    |
|-----------------------|-----------------------------------------------------------------------------------------------------------------------------------------------------------------------------------------------------------------------------------|--------------------------------------------------------|----------------|---------------------------------------------------|----|--------------------------------|----|
| Jones, 2015 (56)      | To assess barriers and facilitators to the use of a patient decision aid designed for serious illness                                                                                                                             | Hospital (outpatient); USA                             | FG             | Seriously ill patients                            | 12 | 66; 28-96                      | 66 |
| Kuluski, 2013 (159)   | To compare goals across each patient, caregiver and physician triad to determine alignment                                                                                                                                        | GP; Canada                                             | ssl (f2f)      | ≥ 2 chronic conditions                            | 27 | 82 (8)                         | 44 |
| Lim, 2017 (146)       | To identify what patients with MM describe as most important to their well-being and health                                                                                                                                       | GP; USA                                                | ssl (f2f)      | Type 1 or 2 diabetes + ≥ 2 chronic conditions     | 31 | 69                             | 45 |
| Lindsay, 2009 (86)    | To examine how patients self-manage MM and especially how they prioritise their conditions                                                                                                                                        | GP; UK                                                 | FG             | Mean conditions: 3.3 (2–8)                        | 53 | 63                             | 45 |
| Linsky, 2015 (40)     | To identify patient perspectives on intentional medication discontinuation in order to optimise medication use                                                                                                                    | GP; USA                                                | FG & ssl (f2f) | ≥ 5 medications                                   | 27 | 66                             | 19 |
| Lyle, 2017 (123)      | To explore older people's experiences of living with neurogenic claudication, their preferences for physiotherapy treatment provision and associated outcomes in order to inform an intervention to be tested in a clinical trial | Hospital (outpatient); UK                              | ssl (f2f)      | Lumbar spinal stenosis + comorbidities            | 15 | 75; 69-80                      | 40 |
| Manias, 2007 (101)    | To investigate perceptions of and experiences with managing drug regimens from the perspectives of patients with osteoarthritis and coexisting chronic conditions and of healthcare professionals from diverse backgrounds        | Hospital outpatient & consumer organisation; Australia | FG             | Osteoarthritis + comorbidities                    | 34 | male: 75 (4)<br>female: 67 (9) | 79 |
| McKillop, 2013 (42)   | To explore attitudes towards medicines, polypharmacy and adherence in patients with CKD                                                                                                                                           | Hospital (outpatient); UK                              | ssl (f2f)      | CKD                                               | 10 | 60; 29-82                      | 50 |
| McPherson, 2014 (171) | To explore and describe patients' and caregivers' perspectives and roles concerning pain management at home                                                                                                                       | Community; Canada                                      | ssl (f2f)      | Advanced cancer receiving palliative care at home | 18 | 78 (9)                         | 56 |
| Moen, 2009 (102)      | To conduct an exploratory study describing multiple medicine use from the elderly patient's perspective                                                                                                                           | Population based; Sweden                               | FG             | ≥ 5 medications                                   | 59 | 76; 67-88                      | 51 |
| Morrow, 2004 (135)    | To describe patient-centred instructions for taking CHF medications that were developed as part of a multifaceted pharmacy-based intervention to improve                                                                          | GP; USA                                                | FG             | CHF                                               | 16 | 64                             | 69 |

|                              |                                                                                                                                                                 |                              |           |                                                                                           |     |                                                                       |     |
|------------------------------|-----------------------------------------------------------------------------------------------------------------------------------------------------------------|------------------------------|-----------|-------------------------------------------------------------------------------------------|-----|-----------------------------------------------------------------------|-----|
|                              | medication adherence and health-related outcomes among older adults with CHF                                                                                    |                              |           |                                                                                           |     |                                                                       |     |
| Morrow, 2008 (44)            | To investigate the life and health goals of older adults with diabetes, and to explore the factors that influence their diabetes self-management                | GP; USA                      | ssl (f2f) | Diabetes + hypertension + comorbidities                                                   | 24  | 69                                                                    | 38  |
| Naganathan, 2016 (140)       | To understand how patients, informal caregivers and family physicians perceive the value of various formal and informal supports for older adults with MM       | GP; Canada                   | ssl (f2f) | ≥ 2 chronic conditions                                                                    | 27  | 82 (8)                                                                | 43  |
| Naik, 2016 (147)             | To identify a taxonomy of health-related values that frame goals of care of older, MM adults who recently faced cancer diagnosis and treatment                  | Hospital (outpatient); USA   | I (n.a.)  | Colorectal, head and neck, gastric, or oesophageal cancers<br>Deyo comorbidity index 6.85 | 146 | 65                                                                    | 2   |
| Noël, 2005 (45)*             | To explore collaborative care needs and preferences in primary care patients with MM                                                                            | GP; USA                      | FG        | ≥ 2 chronic conditions                                                                    | 60  | 30-80                                                                 | 20  |
| O'Dell, 2008 (124)           | To increase understanding of the views of frail elderly women in residential care related to quality of life, values, and preferences for pelvic floor care     | Hospital (outpatient); USA   | ssl (f2f) | "Assisted living or long-term care"                                                       | 25  | Assisted living participants: 87; 73-96;<br>Long term care: 81; 65-89 | 100 |
| Pages-Puigdemont, 2016 (103) | To explore factors that impact on drug compliance and to identify strategies to improve it from the perspective of patients with at least one chronic condition | Hospital (outpatient); Spain | FG        | ≥ 1 chronic condition<br>Mean comorbidities: 2.3 (1.7)                                    | 36  | 65; 39-90                                                             | 53  |
| Parks, 2014 (117)            | To explore sociocultural factors that might influence African American and Hispanic patients' decisions regarding joint replacement                             | Hospital (outpatient); USA   | ssl (f2f) | Osteoarthritis + comorbidities                                                            | 36  | 68 (10)                                                               | 80  |
| Piamjariyakul, 2014 (172)    | To explore end-of-life preferences and determine the presence of signed end-of-life advanced directives                                                         | Community; USA               | I (f2f)   | Cardiovascular disease (severe) + comorbidities                                           | 30  | 70                                                                    | 67  |

|                         |                                                                                                                                                                                                                                               |                                  |            |                                                          |     |                   |    |
|-------------------------|-----------------------------------------------------------------------------------------------------------------------------------------------------------------------------------------------------------------------------------------------|----------------------------------|------------|----------------------------------------------------------|-----|-------------------|----|
| Proctor, 2008 (93)      | To examine older adults' perceptions of depression among co-occurring social, medical, and functional problems and to compare the priority of depression with that of other problems                                                          | Community; USA                   | ssl (f2f)  | Depression + comorbidities (86%)                         | 40  | 74 (6)            | 90 |
| Richardson, 2016 (89)   | To identify and elaborate a range of factors that influence how and why patients with comorbid chronic conditions prioritise their conditions                                                                                                 | GP & Hospital (outpatient); USA  | ssl (f2f)  | Comorbidities mean (range): 6 (3-11)                     | 33  | 61-70: 67%        | 6  |
| Rifkin, 2010 (47)       | To find out how patients prioritise their medical conditions or decide which medications to take                                                                                                                                              | Hospital (outpatient); USA       | ssl (f2f)  | CKD (stages 3-5D)                                        | 20  | 72; 55-84         | 60 |
| Ruggiano, 2017 (173)    | To expand current knowledge in the area of chronic health self-management, this study examined perceptions of transportation and health self-management among older adults with chronic conditions (i.e., chronic illnesses and disabilities) | Community; USA                   | ssl (f2f)  | ≥2 chronic conditions (82%)                              | 37  | 77; 60-97         | 68 |
| Schellinger, 2018 (149) | To examine whole-person goals of patients with serious illness identified during their last 2 to 3 years of life                                                                                                                              | Community; USA                   | l (f2f)    | CHF, cancer and dementia comorbidity score (SD): 5 (1.5) | 160 | 79 (11)           | 48 |
| Schoenberg, 2009 (91)   | Focusing on elders with two or more chronic conditions and low socioeconomic status, to investigate which morbidities older adults prioritise, why, and how they accommodate these conditions.                                                | Community; USA                   | ssl (f2f)  | ≥2 chronic conditions                                    | 41  | 70; 55-90         | 85 |
| Schoenborn, 2015 (142)  | To characterise current practice and opportunities for improvement in the care of older adults with MM in an internal medicine residency clinic                                                                                               | Hospital (inpatient); USA        | l (f2f)    | ≥2 chronic conditions                                    | 30  | 74 (7)            | 73 |
| Seah, 2015 (113)        | To gain insight into the decision-making process leading to opting out of dialysis and experience with conservative non-dialytic management from the patients' perspective                                                                    | Hospital (outpatient); Singapore | ssl (f2f)  | CKD (end-stage)                                          | 9   | Median: 81; 61-84 | 44 |
| Song, 2013 (48)         | To address patient perspectives on the extent of information provided and how decisions to start dialysis are made                                                                                                                            | Hospital (outpatient); USA       | ssl (tel.) | CKD (dialysis) + CCI ≥ 5-6                               | 99  | 61 (12); 28-89    | 53 |

|                      |                                                                                                                                                                                                      |                                        |           |                          |     |            |    |
|----------------------|------------------------------------------------------------------------------------------------------------------------------------------------------------------------------------------------------|----------------------------------------|-----------|--------------------------|-----|------------|----|
| Stapleton, 2005 (72) | To understand how the association between preferences for life-sustaining treatment and depression or quality of life is important in providing care                                                 | Hospital (outpatient); USA             | I (f2f)   | COPD (Oxygen-prescribed) | 101 | 67; 59-74  | 23 |
| Strachan, 2011 (174) | To examine patients' perspectives on related end-of-life issues                                                                                                                                      | Hospital (outpatient); Canada          | I (f2f)   | ICD + comorbidities      | 30  | 63; 26-87  | 20 |
| Tariman, 2014 (49)   | To examine patient perspectives with regard to the personal and contextual factors relevant to treatment decision-making                                                                             | Hospital (outpatient); USA             | ssl (f2f) | Multiple Myeloma         | 20  | 65 (8)     | 60 |
| Visser, 2009 (114)   | To explore the considerations taken into account by patients making decisions concerning renal replacement therapy                                                                                   | Hospital (outpatient); The Netherlands | I (f2f)   | CKD + comorbidities      | 14  | 77 (7)     | 43 |
| Walker, 2012 (175)   | To explore the experiences of patients attempting to integrate lifestyle changes into their lives                                                                                                    | Hospital (outpatient); UK              | ssl (f2f) | CKD (Stage 4)            | 9   | 76         | 56 |
| Weir, 2017 (133)     | To explore decision-making about polypharmacy among older adults and their companions                                                                                                                | Hospital (outpatient); Australia       | ssl (f2f) | CCI 1-5+: 80%            | 30  | 83; 75-85+ | 63 |
| Zulman, 2015 (105)*  | To understand self-management and health care navigation challenges that patients face due to MM and to identify opportunities to support these patients through new and enhanced eHealth technology | GP; USA                                | FG        | ≥ 3 chronic conditions   | 53  | 59 (11)    | 26 |

Table S3b. Key characteristics – Qualitative longitudinal studies

| Source             | Study methods                                                                                                                                                      |                                       |                 | Patient population            |                 |                         |                 |
|--------------------|--------------------------------------------------------------------------------------------------------------------------------------------------------------------|---------------------------------------|-----------------|-------------------------------|-----------------|-------------------------|-----------------|
|                    | Study aim                                                                                                                                                          | Setting, country                      | Data collection | Def of MM                     | Sample (number) | Age: Mean (SD) or range | Sex (% females) |
| Baxter, 2012 (29)* | To increase understanding of disabled and chronically ill people's experiences of revisiting choices by considering events that prompted people to reconsider them | Hospital (outpatient) & Community; UK | I (f2f)         | Chronic conditions + disabled | 20              | 65+: 35%                | 75              |

|                        |                                                                                                                                                                                                                |                                            |                 |                        |     |           |    |
|------------------------|----------------------------------------------------------------------------------------------------------------------------------------------------------------------------------------------------------------|--------------------------------------------|-----------------|------------------------|-----|-----------|----|
| Klindtworth, 2015 (62) | To understand how old and very old patients with advanced CHF perceive their disease and to identify their medical, psychosocial and information needs, focusing on the last stages of life                    | Hospital (inpatient & outpatient); Germany | I (f2f)         | CHF (severe)           | 25  | 85;71-98  | 56 |
| Morris, 2011 (30)*     | To examine what influences self-management priorities in individuals with multiple long-term conditions and how these change over time                                                                         | GP; UK                                     | ssl (f2f, tel.) | ≥ 3 chronic conditions | 21  | 50; 36-84 | 48 |
| Pardon, 2009 (46)      | To identify preferences of advanced lung cancer patients to receive information and participate in decision-making concerning treatment options, health-care-setting transfers and end-of-life decision-making | Hospital (outpatient); Belgium             | ssl (f2f)       | Advanced lung cancer   | 128 | 64; 41-86 | 20 |

**Table S3c. Key characteristics – Quantitative cross-sectional studies (observational)**

| Source                | Study methods                                                                                                                                                                                                                   |                           |                 | Patient population     |                 |                                      |                 |
|-----------------------|---------------------------------------------------------------------------------------------------------------------------------------------------------------------------------------------------------------------------------|---------------------------|-----------------|------------------------|-----------------|--------------------------------------|-----------------|
|                       | Study aim                                                                                                                                                                                                                       | Setting, country          | Data collection | Def of MM              | Sample (number) | Age: Mean (SD) or range              | Sex (% females) |
| Ainslie, 1994 (37)**  | To examine hypotheses that elderly persons refusing minimally described treatment might choose nonaggressive treatment if options were described, and that persons refusing treatment would want an active decision-making role | Community; USA            | S               | ≥2 chronic conditions  | 116             | [older patients]                     | 75              |
| Buttery, 2014 (145)   | To investigate older CHF patients' preferences from hospital, community and home-based service models, and sociodemographic and clinical factors associated with these preferences                                              | Hospital (inpatient); UK  | S               | CHF (moderate-severe)  | 106             | 78 (7)                               | 38              |
| Chanouzas, 2012 (110) | To examine how patient choice of different treatment modalities [haemodialysis, peritoneal dialysis and conservative management] is influenced by personal and demographic parameters                                           | Hospital (outpatient); UK | S               | CKD (pre-dialysis)     | 118             | 67 (14)                              | 48              |
| Chi, 2017 (126)       | To explore preferences for health care decision making among older adults, and identify MM profiles associated                                                                                                                  | Population based; USA     | S               | ≥ 2 chronic conditions | 2,017           | 65-74: 55%<br>75-84: 34%<br>≥85: 12% | 57              |



|                      |                                                                                                                                                                                                                                                            |                               |          |                                   |                   |                           |                   |
|----------------------|------------------------------------------------------------------------------------------------------------------------------------------------------------------------------------------------------------------------------------------------------------|-------------------------------|----------|-----------------------------------|-------------------|---------------------------|-------------------|
|                      | with preferring less active, i.e., passive, participation among older US adults                                                                                                                                                                            |                               |          |                                   |                   |                           |                   |
| Chiu, 2016 (50)      | To determine the Decision Control Preferences (DCP) of diverse, older adults and whether DCPs are associated with participant characteristics, advance care planning, and communication satisfaction                                                       | Hospital (outpatient); USA    | S        | ≥ 2 chronic conditions            | 146               | 71 (10)                   | 41                |
| Collins, 2004 (127)  | To determine whether psychological variables, particularly depression, influence patients' willingness to share medical decisions with family members or friends                                                                                           | Hospital (outpatient); USA    | lc (f2f) | Seriously ill patients<br>CCI ≥ 5 | 95                | 70; 44-85                 | 2                 |
| Davison, 2010 (176)  | To evaluate end-of-life care preferences of CKD patients to help identify gaps between current end-of-life care practice and patients' preferences and to help prioritise and guide future innovation in end of-life care policy                           | Hospital (outpatient); Canada | S        | CKD (stage 4 and 5)               | 584               | 68 (14)                   | 46                |
| De Vries, 2015 (109) | To assess whether patients' willingness to add a blood pressure-lowering drug and the importance they attach to specific treatment characteristics differ among age groups in patients with type 2 diabetes                                                | Community; The Netherlands    | S        | Diabetes + Hypertension           | 151               | 68 (9)                    | 42                |
| Downey, 2013 (79)    | To investigate patient preferences for life-sustaining therapies, clinicians' accuracy in understanding those preferences, and predictors of patient preference and clinician error                                                                        | GP; USA                       | S        | COPD                              | 196               | 69 (10); 39-91            | 0                 |
| Ehman, 2017 (138)    | To test if multimorbidity patients may value continuity more highly than healthy patients, and thus may prefer to wait to see their primary care physician (PCP)                                                                                           | GP; USA                       | S        | MM<br>Tier score: 3 or 4          | 193               | 62 (65+; 119)             | 58                |
| Ekdahl, 2011 (129)   | To investigate the preferred and the actual degree of control, i.e. the role elderly people with co-morbidities wish to assume and actually had with regard to information and participation in medical decision making during their last stay in hospital | Hospital (inpatient); Sweden  | S        | ≥ 3 chronic conditions            | 156               | 83; 76-98                 | 51                |
| Elie, 2018 (177)     | To compare SPMI and CMI patients' end-of-life care preferences and comfort level with end-of-life care discussions, and identify potential predictors of interest in medical assistance in dying                                                           | Hospital (outpatient); Canada | S        | SPMI and CMI                      | SPMI; 106; CMI 95 | SPMI 66 (13); CMI 63 (13) | SPMI: 63; CMI: 60 |

|                      |                                                                                                                                                                                                                                                            |                                        |          |                                                                     |       |                                      |    |
|----------------------|------------------------------------------------------------------------------------------------------------------------------------------------------------------------------------------------------------------------------------------------------------|----------------------------------------|----------|---------------------------------------------------------------------|-------|--------------------------------------|----|
| Flynn, 2007 (178)    | To explore relationships between five factors of personality and four preference types that account for multiple components of the health care decision-making process (information exchange, deliberation, and selection of treatment choice)             | Population based; USA                  | S        | Mean OARS conditions: 3.8 (2.5);<br>Mean medications: 2.8 (2.5)     | 5,830 | 64 (1)                               | 54 |
| Fox, 2018 (122)      | To explore older hospitalised patients' perceived acceptability of, and preference for, two low-intensity early activity interventions (bed-to-sitting and sitting-to-walking), and characteristics associated with perceived acceptability and preference | Hospital (inpatient); Canada           | S        | ≥2 chronic conditions                                               | 60    | 79 (8)                               | 53 |
| Fried, 1994 (179)    | To characterise the limitation of care in routine geriatric practice in advance of and at the time of a patient's final episode of illness.                                                                                                                | GP; USA                                | Chart    | Seriously ill patients<br>CHF, COPD, CKD or cancer                  | 59    | 84 (8)                               | 85 |
| Fried, 2002a (180)   | To examine the effects of the burden of treatment and a variety of possible outcomes on the preferences for care expressed by older patients with serious illnesses                                                                                        | Hospital (inpatient & outpatient); USA | lc (f2f) | Seriously ill patients<br>CHF, COPD, CKD or cancer                  | 226   | 73 (7)                               | 43 |
| Fried, 2002b (81)    | To develop a patient-centred measure of treatment preference applicable across a range of diseases and treatment decisions                                                                                                                                 | Hospital (inpatient & outpatient); USA | Survey   | Seriously ill patients<br>CHF, COPD, CKD or cancer                  | 125   | 73 (7)                               | 43 |
| Fried, 2011a (181)** | To explore the use of a simple tool to elicit older persons' health outcome priorities                                                                                                                                                                     | GP; USA                                | lc (f2f) | ≥ 4 chronic conditions (69%)<br>+ ≥ 4 medications (49%)             | 357   | [older patients]                     | 75 |
| Fried, 2011b (153)   | To develop and test a simple tool to elicit the preferences of older persons based on prioritisation of universal health outcomes                                                                                                                          | Community housing; USA                 | lc (f2f) | Hypertension + fall risk<br>Mean chronic conditions (SD): 2.9 (1.1) | 81    | 65-74: 16%<br>75-84: 54%<br>85+: 30% | 69 |
| Girones, 2012 (119)  | To examine the relationships between preferences and chemotherapy use in this group of patients                                                                                                                                                            | Hospital (inpatient); Spain            | S        | Lung cancer + comorbidities (84%).                                  | 83    | 77; 70-91                            | 24 |

|                       |                                                                                                                                                                                                                                |                                              |   |                                                                                          |       |                                     |                      |
|-----------------------|--------------------------------------------------------------------------------------------------------------------------------------------------------------------------------------------------------------------------------|----------------------------------------------|---|------------------------------------------------------------------------------------------|-------|-------------------------------------|----------------------|
| Green, 2016 (116)     | To explore patients' perceptions of their decision-making experiences related to ICDs                                                                                                                                          | Hospital (outpatient); USA                   | S | ICD + comorbidities (71%)                                                                | 295   | 65-74: 25%<br>75-84: 23%<br>85+: 3% | 22                   |
| Gum, 2010 (139)       | To examine use of behavioural health services, treatment preferences, and facilitators and barriers to service use in older adults receiving home-based services within the aging network                                      | Aging network agencies; USA                  | S | ≥ 2 chronic conditions<br>No medication group: 4.4 (2.1);<br>Medication group: 5.7 (2.8) | 142   | 75 (8)                              | 80                   |
| Hamelinck, 2016 (120) | To examine patients' preferences for adjuvant chemotherapy and adjuvant hormonal therapy, factors related to minimally required benefit, and patients' self-reported motivations                                               | Hospital (outpatient); The Netherlands       | S | Advanced cancer + comorbidities                                                          | 81    | Median: 61;<br>42-86                | 100                  |
| Hopper, 2016 (54)     | Use questionnaires to examine the attitudes of patients and prescribing clinicians to medication withdrawal                                                                                                                    | Hospital (inpatient & outpatient); Australia | S | CHF + ≥ 5 medications                                                                    | 85    | 61 (12)                             | 27                   |
| Janssen, 2011 (182)   | To assess life-sustaining treatment preferences, advance care planning, and the quality of end-of-life care communication in Dutch outpatients with clinically stable but severe COPD or CHF                                   | Hospital (outpatient); The Netherlands       | S | COPD or CHF (severe)                                                                     | 185   | COPD 66 (9); CHF: 76 (8)            | COPD: 38;<br>CHF: 32 |
| Janssen, 2013 (183)   | To understand the preferences for life-sustaining treatments of outpatients on dialysis and to study the quality of patient-physician communication about end-of-life care and barriers and facilitators to this communication | Hospital (outpatient); The Netherlands       | S | CKD (Dialysis)                                                                           | 80    | 62 (16)                             | 40                   |
| Janssen, 2015 (154)   | To rate the relative importance of different outcomes for haemodialysis patients and to analyse whether the relative importance differed among subgroups of patients                                                           | Hospital (outpatient); Germany               | S | CKD (Dialysis)                                                                           | 4,518 | 67 (14)                             | 42                   |
| Jorgensen, 2013 (57)  | To identify potential barriers to adjuvant chemotherapy, use in older patients by examining the associations between patient age, factors influencing chemotherapy                                                             | Hospital (outpatient); Australia             | S | Colon cancer + ≥1 chronic condition                                                      | 35    | 74 (5)                              | 47                   |

|                           |                                                                                                                                                                                                   |                                  |          |                                                                            |       |                                    |    |
|---------------------------|---------------------------------------------------------------------------------------------------------------------------------------------------------------------------------------------------|----------------------------------|----------|----------------------------------------------------------------------------|-------|------------------------------------|----|
|                           | treatment decisions, and preferences for information and decision-making involvement                                                                                                              |                                  |          |                                                                            |       |                                    |    |
| Junius-Walker, 2011 (84)  | To disclose patients' and doctors' perspectives on individual health and treatment priorities                                                                                                     | GP; Germany                      | Ic (f2f) | Mean health problems (SD): 11.9 (5.4)                                      | 123   | 78 (5)                             | 67 |
| Junius-Walker, 2015 (184) | To examine older patients' perceived burden of their health problems                                                                                                                              | GP; Germany                      | S        | Median of health problems (IQR): 11 (8–15)                                 | 836   | 79 (4)                             | 61 |
| Karel, 2015 (155)         | To examine the individual variability, thematic content, and sociodemographic correlates of valued life abilities and activities among MM veterans diagnosed with life-altering cancer            | Hospital (outpatient); USA       | Ic (f2f) | Head and neck, oesophageal, gastric, or colorectal cancer; CCI 6.85 (4.41) | 144   | 0–70: 51%<br>>70: 23%              | 2  |
| Kerr, 2007 (85)           | To understand how the number, type, and severity of comorbidities influence diabetes patients' self-management and treatment priorities                                                           | Community; USA                   | S        | Diabetes + comorbidities                                                   | 1,191 | <65: 30%<br>65–74: 40%<br>>74: 30% | 53 |
| Krucien, 2015 (31)*       | To identify the preferences of patients with MM for recommendations of the Chronic Care Model                                                                                                     | GP; France                       | S        | ≥ 1 chronic condition + obstructive sleep apnoea syndrome                  | 150   | 61–69: 42%<br>≥ 70: 23%            | 29 |
| Krumholz, 1998 (32)*      | To describe the resuscitation preferences of patients hospitalised with an exacerbation of severe CHF, perceptions of those preferences by their physicians, and the stability of the preferences | Hospital (inpatient); USA        | Ic (f2f) | CHF (severe)                                                               | 936   | 65–74: 28%<br>> 75: 26%            | 48 |
| Lee, 2006 (185)           | To compare attitudes towards making end-of-life decisions in non-demented and mildly demented Chinese subjects                                                                                    | Nursing home; China              | S        | Dementia / no dementia + comorbidities                                     | 56    | 82 (6)                             | 95 |
| Li, 2016 (63)             | To understand treatment preferences of Parkinson patients with regard to end-of-life care                                                                                                         | Hospital (outpatient); Singapore | S        | ≥ 2 chronic conditions<br>Parkinson 54%                                    | 136   | 63                                 | 38 |
| Linsky, 2017 (41)         | To develop a survey instrument that assesses patients' experience with and attitudes toward deprescribing                                                                                         | GP; USA                          | S        | ≥ 5 medications                                                            | 790   | 66–75: 43%<br>≥ 76: 19%            | 15 |

|                      |                                                                                                                                                                                                                                                      |                                       |          |                                                                                            |     |                                                                  |     |
|----------------------|------------------------------------------------------------------------------------------------------------------------------------------------------------------------------------------------------------------------------------------------------|---------------------------------------|----------|--------------------------------------------------------------------------------------------|-----|------------------------------------------------------------------|-----|
| Maida, 2010 (186)    | To evaluate the correlations that exist between preferences for pursuing active and aggressive medical interventions                                                                                                                                 | Hospital (outpatient); Canada         | S        | Advanced cancer                                                                            | 380 | 73; 19-99                                                        | 56  |
| McDonald, 2011 (87)  | To assess patients' and physicians' perceived importance of clinical problems and to describe the level of concordance between patients and physicians in relation to these problems                                                                 | Hospital (outpatient); Australia      | Ic (f2f) | COPD & asthma                                                                              | 52  | 70 (8); 55-87                                                    | 60  |
| Milic, 2016 (43)     | To (quantify tablet burden in women with metastatic breast cancer, establish which groups of drugs contribute most to this burden and gain insight into patients' attitudes towards oral anti-cancer treatment                                       | Hospital (inpatient & outpatient); UK | S        | Metastatic breast cancer with polypharmacy                                                 | 100 | 60; 31-95                                                        | 100 |
| Moise, 2017 (130)    | To assess whether elevated depressive symptoms are associated with decision-making preference in patients with comorbid chronic illness                                                                                                              | GP; USA                               | S        | Hypertension + depression. CCI: 3.2 (2.4)                                                  | 195 | 64 (9)                                                           | 72  |
| Morton, 2012 a (112) | To quantify pre-dialysis patients' and pre-dialysis caregivers' preferences for treatment-related attributes of kidney dialysis and the trade-offs they were willing to accept in making a choice between the different dialysis modalities          | Hospital (outpatient); Australia      | S        | CKD (end stage)                                                                            | 105 | Median: 63; 55-71                                                | 44  |
| Morton, 2012 b (111) | To determine the most important characteristics of dialysis and the trade-offs patients were willing to make in choosing dialysis instead of conservative care                                                                                       | Hospital (outpatient); Australia      | S        | CKD (end stage)                                                                            | 105 | Median: 63; 55-71                                                | 44  |
| Moss, 2001 (65)      | To examine the attitudes of dialysis patients toward CPR in the dialysis unit                                                                                                                                                                        | Hospital (outpatient); USA            | Ic (f2f) | CKD                                                                                        | 469 | 61 (16)                                                          | 54  |
| Naik, 2011 (131)     | To evaluate the effect of functional health literacy on decision-making preferences; and among those initially preferring a passive decision-making role, to explore how preferences change if their physician actively encourages their involvement | Hospital (outpatient); USA            | S        | Cardiovascular disease<br>Comorbidities: active style 5.98 (1.67); passive style 5.0 (2.1) | 100 | 71 (6) active decision-making;<br>75 (6) passive decision-making | 100 |
| Obrien, 1995 (66)    | To determine life-sustaining treatment preferences among nursing home residents, whether information                                                                                                                                                 | Nursing home; USA                     | Ic (f2f) | > 5 chronic conditions (60%)                                                               | 421 | < 70: 11%<br>70-79: 25%                                          | 80  |

|                              |                                                                                                                                                                                                                                                                                                                                                                                                                           |                                      |          |                                        |       |                           |    |
|------------------------------|---------------------------------------------------------------------------------------------------------------------------------------------------------------------------------------------------------------------------------------------------------------------------------------------------------------------------------------------------------------------------------------------------------------------------|--------------------------------------|----------|----------------------------------------|-------|---------------------------|----|
|                              | regarding CPR affected these preferences, and with whom treatment preferences had been discussed, and to identify factors associated with CPR preferences                                                                                                                                                                                                                                                                 |                                      |          |                                        |       | 80-89: 45%<br>90-103: 19% |    |
| Pandhi, 2008 (141)           | To determine if patients vary in perceptions of safety if interpersonal continuity is disrupted. If so, which characteristics are associated with feeling unsafe?                                                                                                                                                                                                                                                         | Community;<br>USA,                   | S        | Chronic conditions + polypharmacy >80% | 6,827 | 64; 63-66                 | 54 |
| Perret-Guillaume, 2011 (132) | To investigate elderly patients' willingness to accept antihypertensive therapy and their desire for information and for participation in medical decisions                                                                                                                                                                                                                                                               | Hospital (inpatient);<br>Switzerland | S        | Hypertension + comorbidities           | 120   | 84 (7)                    | 80 |
| Rahemi, 2018 (69)            | To investigate the influence of sociodemographic factors, acculturation, ethnicity, health status, and spirituality on older adults' health-related decisions when confronted with a choice between competing options                                                                                                                                                                                                     | Population based;<br>USA             | S        | Seriously ill patients                 | 451   | 75 (8)                    | 32 |
| Reinke, 2011 (70)            | To assess whether a history of depression or active depressive symptoms is associated with preferences for life-sustaining therapies among veterans with COPD                                                                                                                                                                                                                                                             | Hospital (outpatient);<br>USA        | S        | COPD & depression                      | 376   | 70 (10)                   | 3  |
| Robben, 2011 (148)           | To know what a particular patient values most and what his or her care-related goals are                                                                                                                                                                                                                                                                                                                                  | Community;<br>The Netherlands        | Chart    | Frail                                  | 336   | 81; 61-99                 | 70 |
| Rodriguez, 2008 (187)        | To assess patients' preferred role and perceived level of involvement in medical decision making and test the effects of patients' age and role preference on perceived involvement in medical decision making                                                                                                                                                                                                            | GP & Hospital (outpatient);<br>USA   | S (tel.) | CHF (advanced)                         | 90    | 70; 42-88                 | 6  |
| Sharma, 2016 (71)            | To determine knowledge of the CPR process, preference for CPR, and desire to participate in end-of-life decision making amongst older hospitalised patients                                                                                                                                                                                                                                                               | Hospital (inpatient);<br>New Zealand | S        | ≥ 2 chronic conditions<br>CCI 5 (4-10) | 100   | 82; 65-98                 | 50 |
| Sudore, 2010 (188)           | To examine the prevalence of uncertainty concerning advance decisions about life sustaining treatment among chronically ill, racially=ethnically diverse older adults with varying levels of health literacy; and to assess the associations between literacy and race=ethnicity with decisional uncertainty, hypothesising that low literacy and minority status would each be independently associated with uncertainty | Hospital (outpatient);<br>USA        | 1c (f2f) | ≥ 2 chronic conditions                 | 205   | 61 (8)                    | 53 |

|                          |                                                                                                                                                                                         |                                                 |   |                                                                                                       |       |                                       |    |
|--------------------------|-----------------------------------------------------------------------------------------------------------------------------------------------------------------------------------------|-------------------------------------------------|---|-------------------------------------------------------------------------------------------------------|-------|---------------------------------------|----|
| Tamura, 2010 (189)       | To explore preferences for withdrawal and engagement in advance care planning also in terms of age, race and ethnicity                                                                  | Hospital (outpatient); USA                      | S | CKD (end stage)                                                                                       | 61    | 62 (15)                               | 26 |
| Tang, 2015 (73)          | To explore heterogeneity and changes in patterns of life sustaining treatment preferences among 2 independent cohorts of terminally ill patients with cancer recruited a decade apart   | Hospital (outpatient); Taiwan                   | S | Advanced cancer                                                                                       | 4,353 | 65-74: 50%<br>75-85: 20%<br>> 85: 13% | 44 |
| Tinetti, 2008 (156)      | To determine the priority that older adults with coexisting hypertension and fall risk give to optimising cardiovascular outcomes versus fall- and medication symptom- related outcomes | Nursing home; USA                               | S | Hypertension + fall risk (frail patients)                                                             | 123   | 82 (6)                                | 71 |
| Toto, 2015 (160)         | To evaluate the feasibility of generating patient-centred goals using goal attainment scale with older adults who have MM and were recruited through primary care                       | GP; USA                                         | S | ≥ 2 chronic conditions (Geriatric and / or Psychiatry)                                                | 27    | 77 (6)                                | 70 |
| Uhlmann, 1991 (75)       | To investigate whether perceived quality of life is associated with preferences for life-sustaining treatment in older adults                                                           | Hospital (outpatient); USA                      | S | Seriously ill patients                                                                                | 258   | 74                                    | 54 |
| Utens, 2013 (143)        | To investigate patient preference for treatment place, associated factors and patient satisfaction with a community-based hospital-at-home scheme for COPD exacerbations                | Hospital & home care organisations; Netherlands | S | COPD + acute exacerbation<br>CCI > 1: Usual hospital care 27 (39%); Early assisted discharge 32 (46%) | 139   | 68 (11)                               | 62 |
| van Summeren, 2017 (158) | To determine proposed and observed medication changes when using an outcome prioritisation tool during a medication review in general practice                                          | GP; The Netherlands                             | S | ≥ 2 chronic conditions (one cardiovascular disease) + ≥ 5 medications                                 | 59    | Median: 83;<br>81-86                  | 51 |
| Wieldraaijer, 2018 (144) | To assess what caregivers patients prefer to contact when faced with symptoms during survivorship care, what patient factors are associated with a preferred                            | Hospital (outpatient); Netherlands              | S | Colorectal cancer + comorbidities                                                                     | 260   | 67; 32-94                             | 46 |

|  |                                                                                     |  |  |  |  |  |  |
|--|-------------------------------------------------------------------------------------|--|--|--|--|--|--|
|  | caregiver, and whether the type of symptom is associated with a preferred caregiver |  |  |  |  |  |  |
|--|-------------------------------------------------------------------------------------|--|--|--|--|--|--|

**Table S3d. Key characteristics – Quantitative longitudinal studies (observational)**

| Source                     | Study methods                                                                                                                                                                                                                         |                                        |                 | Patient population                                               |                 |                         |                 |
|----------------------------|---------------------------------------------------------------------------------------------------------------------------------------------------------------------------------------------------------------------------------------|----------------------------------------|-----------------|------------------------------------------------------------------|-----------------|-------------------------|-----------------|
|                            | Study aim                                                                                                                                                                                                                             | Setting, country                       | Data collection | Def of MM                                                        | Sample (number) | Age: Mean (SD) or range | Sex (% females) |
| Brunner-LaRocca, 2012 (28) | To investigate end-of-life and CPR preferences in elderly CHF patients. In addition, predictive factors for willingness to trade survival time for better quality of life, and for wanting resuscitation if necessary, were evaluated | Hospital (outpatient); Switzerland     | S               | CHF (severe)                                                     | 622             | 77 (8)                  | 41              |
| Casarett, 2006 (77)        | To determine whether patient preferences are a barrier to hospice enrolment                                                                                                                                                           | Hospital (inpatient & outpatient); USA | lc (f2f)        | Seriously ill patients CHF, COPD, CKD or cancer                  | 203             | 73; 60-93               | 43              |
| Case, 2013 (150)           | To assess older adults' attitudes toward eliciting health outcome priorities                                                                                                                                                          | Nursing home; USA                      | S               | ≥ 4 chronic conditions (69%), ≥ 1 IADLs (26%) + depression (28%) | 356             | 76 (7)                  | 75              |
| Cosgriff, 2007 (78)        | To determine the association of preferences with end-of-life care                                                                                                                                                                     | Hospital (outpatient); USA             | lc (f2f)        | Seriously ill patients CHF, COPD, CKD or cancer                  | 118             | 73 (7)                  | 42              |
| Dunlay, 2014 (80)          | To evaluate the resuscitation preferences of patients at study enrolment, to describe changes in resuscitation preferences over time, and to assess how resuscitation preferences relate to survival                                  | Hospital (outpatient); USA             | S               | CHF (severe)                                                     | 608             | 74                      | 45              |
| Efficace, 2014 (52)        | To assess preferences for involvement in treatment decisions and requests for prognostic information in newly diagnosed higher-risk MDS patients                                                                                      | Hospital (outpatient); Italy           | S               | MDS with IPSS risk score of intermediate or high risk            | 280             | 70; 32-89               | 37              |



|                      |                                                                                                                                                                                                                                                     |                                        |          |                                                    |       |                  |    |
|----------------------|-----------------------------------------------------------------------------------------------------------------------------------------------------------------------------------------------------------------------------------------------------|----------------------------------------|----------|----------------------------------------------------|-------|------------------|----|
| Fried, 2006 (162)    | To examine changes over time in end-of-life treatment preferences, measured in terms of willingness to undergo treatment based on the health state that would result from the treatment, in a cohort of older persons with advanced chronic illness | Hospital (inpatient & outpatient); USA | lc (f2f) | Seriously ill patients<br>CHF, COPD, CKD or cancer | 226   | 73 (7)           | 53 |
| Fried, 2007 a (59)   | To determine whether preferences for future life-sustaining treatments change over time in a consistent and predictable manner                                                                                                                      | Community; USA                         | lc (f2f) | Seriously ill patients<br>CHF, COPD, CKD or cancer | 189   | 73 (7)           | 45 |
| Fried, 2007 b (58)   | To examine changes in treatment preferences over time                                                                                                                                                                                               | GP; USA                                | S        | Seriously ill patients<br>CHF, COPD, CKD or cancer | 226   | 73 (7)           | 43 |
| Hamel, 1999 (60)     | To determine the effect of age on decisions to withhold life-sustaining therapies                                                                                                                                                                   | Hospital (inpatient); USA              | lc (f2f) | Seriously ill patients                             | 9,105 | Median: 63       | 44 |
| Hamel, 2000 (36)*,** | To review previously published findings about how patient age influenced patterns of care for seriously ill patients                                                                                                                                | Hospital (inpatient); USA              | lc (f2f) | Seriously ill patients                             | 9,105 | [older patients] | nr |
| Janssen, 2012 (61)   | To investigate 1-year stability of preferences regarding CPR and mechanical ventilation in outpatients with advanced COPD, CHF, or CKD and to identify predictors of changes in preferences                                                         | Hospital (outpatient); The Netherlands | lc (f2f) | Advanced COPD, CHF or CKD                          | 265   | 67 (13)          | 36 |
| Lynn, 2000 (64)      | To characterise COPD over patients' last 6 months of life                                                                                                                                                                                           | Hospital (inpatient); USA              | lc (f2f) | COPD + ≥ 3 comorbidities                           | 416   | 72               | 75 |
| Ostermann, 2003 (67) | To ascertain the initial views of a haemodialysis cohort in the UK in terms of their CPR status in the event of an in-hospital cardiac arrest unrelated to dialysis                                                                                 | Hospital (outpatient); UK              | lc (f2f) | CKD (Haemodialysis)                                | 11    | 74 (10); 46-81   | 50 |
| Parr, 2010 (68)      | To understand age differences in advanced cancer patients' end-of-life experiences                                                                                                                                                                  | Hospital (inpatient); USA              | lc (f2f) | Advanced cancer CCI: 10.0 (2.7)                    | 126   | 72 (6)           | 50 |

|                     |                                                                                                                                                                                                                                                           |                              |          |                                                                             |       |                           |     |
|---------------------|-----------------------------------------------------------------------------------------------------------------------------------------------------------------------------------------------------------------------------------------------------------|------------------------------|----------|-----------------------------------------------------------------------------|-------|---------------------------|-----|
| Rothman, 2007 (107) | To assess the frequency of, reasons for, factors associated with, and outcomes of treatment refusal among older persons with advanced chronic disease                                                                                                     | Hospital (outpatient); UK    | lc (f2f) | Advanced cancer, CHF or COPD                                                | 226   | 74 (7)                    | 43  |
| Suggs, 2017 (118)   | To analyse factors associated with selection of the following treatment modalities (breast conservation surgery, mastectomy, and contralateral prophylactic mastectomy) in a rural West Virginia tertiary care hospital                                   | Hospital (outpatient); USA   | Chart    | Breast Cancer (early stage)<br>CCI mean (SD):<br>BCS 2.2 (0.5); M 2.4 (0.7) | 226   | 74 (7)                    | 43  |
| Tang, 2016 (33)*    | To explore longitudinal changes in life sustaining treatment preferences and their associations with accurate prognostic awareness, physician-patient end-of-life care discussions, and depressive symptoms in terminally ill cancer patients' final year | Hospital (inpatient); Taiwan | lc (f2f) | Advanced cancer                                                             | 302   | >65: 32%                  | 43  |
| Teno, 2000 (74)     | To evaluate decision-making and outcomes in seriously ill patients with an intensive care unit stay of at least 14 days                                                                                                                                   | Community; USA               | lc (f2f) | Seriously ill patients                                                      | 1,264 | BCS:62 (12)<br>M: 61 (13) | 100 |
| Weeks, 1998 (76)    | To test the hypothesis that among terminally ill cancer patients an accurate understanding of prognosis is associated with a preference for therapy that focuses on comfort over attempts at life extension                                               | Hospital (inpatient); USA    | lc (f2f) | Advanced cancer                                                             | 917   | 62                        | 38  |
| Wright, 2010 (34)*  | To examine whether patients' desire for life extending therapy was associated with their end-of-life care                                                                                                                                                 | Hospital (outpatient); USA   | S        | Advanced cancer                                                             | 301   | 60-69: 28%<br>> 70: 21%   | 47  |
| Zafar, 2013 (35)*   | To determine how patient's preferences guide the course of palliative chemotherapy for advanced colorectal cancer                                                                                                                                         | Hospital (outpatient); USA   | S        | Metastatic colorectal cancer                                                | 702   | 65-74: 25%<br>75: 27%     | 38  |
| Zulman, 2010 (90)   | To understand patterns of patient-provider concordance in the prioritisation of health conditions in patients with MM                                                                                                                                     | GP; USA                      | S        | Diabetes + hypertension + comorbidities                                     | 1,169 | 65 (11)                   | nr  |

**Table 3e. Key characteristics – Quantitative study (interventional)**

| Source | Patient population |
|--------|--------------------|
|--------|--------------------|

|                          | Study aim                                                                                                                                           | Setting, country | Intervention                             | Randomisation                | Data collection | Def of MM                  | Sample (number)         | Age: Mean (SD) or range | Sex (% females) |
|--------------------------|-----------------------------------------------------------------------------------------------------------------------------------------------------|------------------|------------------------------------------|------------------------------|-----------------|----------------------------|-------------------------|-------------------------|-----------------|
| Junius-Walker, 2012 (83) | To investigate whether a structured priority-setting consultation reconciles the often-differing doctor-patient views on the importance of problems | GP; Germany      | Structured priority-setting consultation | CRT (randomisation unit=GPs) | S               | Mean health problems: 11.4 | 317*** (IG=174; CG=143) | 78                      | 67              |

Table S3f. Key characteristics – Mixed-methods studies

| Source                   | Study aim                                                                                                                                                                                                                                | Setting, country              | Data collection | Patient population                                                    |                 |                                     |                 |
|--------------------------|------------------------------------------------------------------------------------------------------------------------------------------------------------------------------------------------------------------------------------------|-------------------------------|-----------------|-----------------------------------------------------------------------|-----------------|-------------------------------------|-----------------|
|                          |                                                                                                                                                                                                                                          |                               |                 | Def of MM                                                             | Sample (number) | Age: Mean (SD) or range             | Sex (% females) |
| Adams, 2013 (190)        | To investigate the ease with which patients of differing functional ability use three types of multi-compartment medication device and whether some types are easier to use than others                                                  | Hospital (inpatient); USA     | S & I (f2f)     | 1 - 15 medications (median 5)                                         | 50              | Median: 85; 77-98                   | 76              |
| Puts, 2017 (121)         | To better understand the treatment decision process from all perspectives                                                                                                                                                                | Hospital (outpatient); Canada | S & I (f2f)     | Advanced cancer                                                       | 32              | 63–69: 9%<br>70–79: 56%<br>80+: 34% | 31              |
| van Summeren, 2016 (157) | To explore an outcome prioritisation tool in eliciting individuals' preferred health outcomes (remaining alive, maintaining independence, reducing pain, reducing other symptoms) in the context of medication review in family practice | GP; The Netherlands           | S & I (f2f)     | ≥ 2 chronic conditions (one cardiovascular disease) + ≥ 5 medications | 60              | 84 (4)                              | 52              |

CCI=Charlson Comorbidity Index; CHF=Chronic Heart Failure; CKD=Chronic Kidney Disease; CMI=Chronic Medically Ill; COPD=Chronic Obstructive Pulmonary Disease; CPR=CardioPulmonary Resuscitation; CRT=Cluster Randomised Controlled Trial; f2f=face-to-face; FG=Focus Groups; GPs=General Practice; IADL=Instrumental Activity of Daily Living; ICD=Implantable Cardioverter Defibrillator; I=open-ended questions interview; Ic=closed-ended questions

interview; IPSS=International Prognostic Scoring System; IQR=Interquartile Range; MDS=Myelodysplastic Syndromes; MM=Multimorbidity; n=number; nr=not reported; OARS=Older Americans Resources and Services; S=Survey; SD=Standard Deviation; SPMI=Severe and Persistent Mental Illness; ssi=semi-structured interviews; ssi (tel.) = semi-structured interviews (telephone); UK=United Kingdom; USA=United States of America; 2a=Secondary analysis.

\* The study included a larger sample based on different (younger) age groups. In the present evidence map, only data from patients of 60 years of age or older were considered. Studies are included if preferences of older patients are addressed separately in the study, even when they included younger populations.

\*\*The study did not report descriptives of age but mentions the included population are “older patients”.

\*\*\*Number of patients analysed.
