# Supplementary material for: Health-related preferences of older patients with multimorbidity: an evidence map
Source: PubMed Central journal article supplement — BMJ Open. 2019 Dec 15;9(12):e034485. doi: 10.1136/bmjopen-2019-034485 (PMC6924802; doi:10.1136/bmjopen-2019-034485), 2019-12-15
Supplement: bmjopen-2019-034485supp004.pdf [file bmjopen-2019-034485supp004.pdf]

**Table S4. Excluded studies and reasons for exclusion.**

| Source                                                                                                                                                                                                                                                                                                       | Reason for exclusion                |
|--------------------------------------------------------------------------------------------------------------------------------------------------------------------------------------------------------------------------------------------------------------------------------------------------------------|-------------------------------------|
| ———. 2014. 'Abstracts of Papers Presented at the Health Services Research and Pharmacy Practice Conference, HSRPP 2014', <i>International Journal of Pharmacy Practice</i> . Conference: Health Services Research and Pharmacy Practice Conference, HSRPP, 22.                                               | Document type: Editorials & reviews |
| ———. 2018. 'Poster Abstracts - Post Acute and Long Term Care Medicine 2018', <i>Journal of the American Medical Directors Association</i> . Conference: Society for Post Acute and Long Term Care Medicine Annual Conference, 19.                                                                            | Document type: Editorials & reviews |
| Adams, E. K., R. Houchens, G. E. Wright, and J. Robbins. 1991. 'Predicting hospital choice for rural Medicare beneficiaries: the role of severity of illness', <i>Health Services Research</i> , 26: 583-612.                                                                                                | Population: Not multimorbid         |
| Adeniji, C., C. Kenning, P. A. Coventry, and P. Bower. 2015. 'What are the core predictors of 'hassles' among patients with multimorbidity in primary care? A cross sectional study', <i>BMC Health Services Research</i> , 15: 255.                                                                         | Outcome: Preferences not addressed  |
| Aikens, J. E., D. E. Nease Jr, and M. S. Klinkman. 2008. 'Explaining patients' beliefs about the necessity and harmfulness of antidepressants', <i>Annals of Family Medicine</i> , 6: 23-29.                                                                                                                 | Population: Age <60 yrs.            |
| Akpan, A., C. Roberts, G. Turner, and J. Banerjee. 2017. 'Developing an internationally agreed standard set of health outcome measures for older people', <i>Age and Ageing</i> , 46 (Supplement 1): i35.                                                                                                    | Outcome: Preferences not addressed  |
| Al Onazi, M., M. Al Jondeby, M. Azeem, and A. Al Sayyari. 2011. 'Factors affecting Saudi hemodialysis patients' perception of healthcare providers' empathy', <i>Arab journal of nephrology and transplantation</i> , 4: 71-76.                                                                              | Outcome: Preferences not addressed  |
| Alami, S., D. Desjeux, M. M. Lefevre-Colau, A. S. Boisgard, E. Boccard, F. Rannou, and S. Poiraudau. 2011. 'Management of pain induced by exercise and mobilization during physical therapy programs: views of patients and care providers', <i>BMC Musculoskeletal Disorders</i> , 12: 172.                 | Population: Age <60 yrs.            |
| Albada, A., and M. Triemstra. 2009. 'Patients' priorities for ambulatory hospital care centres. A survey and discrete choice experiment among elderly and chronically ill patients of a Dutch hospital', <i>Health Expect</i> , 12: 92-105.                                                                  | Population: Age <60 yrs.            |
| Alderman, A. K., S. T. Hawley, J. Waljee, M. Mujahid, M. Morrow, and S. J. Katz. 2008. 'Understanding the impact of breast reconstruction on the surgical decision-making process for breast cancer', <i>Cancer</i> , 112: 489-94.                                                                           | Population: Age <60 yrs.            |
| Allen, D., V. Badro, L. Denyer-Willis, M. Ellen Macdonald, A. Pare, T. Hutchinson, P. Barre, R. Beauchemin, H. Bocti, A. Broadbent, and S. R. Cohen. 2015. 'Fragmented care and whole-person illness: Decision-making for people with chronic end-stage kidney disease', <i>Chronic Illness</i> , 11: 44-55. | Outcome: Preferences not addressed  |
| AlRuthia, Yazed Sulaiman. 2016. 'The value of online medication rating systems to older adults and their association with self-reported outcomes', 76.                                                                                                                                                       | Outcome: Preferences not addressed  |

|                                                                                                                                                                                                                                                                                                                                                              |                                       |
|--------------------------------------------------------------------------------------------------------------------------------------------------------------------------------------------------------------------------------------------------------------------------------------------------------------------------------------------------------------|---------------------------------------|
| Alsinnawi, M., A. E. Slee, J. S. Banerji, K. L. Dahl, S. Akapame, Iii J. D. Massman, E. M. Wolff, and J. M. Corman. 2016. 'Does a clear understanding of life expectancy increase decisional conflict and anxiety for men with newly diagnosed prostate cancer?', <i>Journal of Urology</i> , 1): e31.                                                       | Document type: Conference proceedings |
| Amblas-Novellas, J., J. Espauella, L. Rexach, B. Fontecha, M. Inzitari, C. Blay, and X. Gomez-Batiste. 2015. 'Frailty, severity, progression and shared decision-making: A pragmatic framework for the challenge of clinical complexity at the end of life', <i>European Geriatric Medicine</i> , 6: 189-94.                                                 | Population: Age <60 yrs.              |
| Anonymous. 2013. '2013 CAEP/ACMU Scientific Abstracts, CAEP 2013', <i>Canadian Journal of Emergency Medicine</i> , 15 (Suppl 1): S1.                                                                                                                                                                                                                         | Document type: Editorials & reviews   |
| Apkarian, A. Vania, Yamaya Sosa, Beth R. Krauss, P. Sebastian Thomas, Bruce E. Fredrickson, Robert E. Levy, R. Norman Harden, and Dante R. Chialvo. 2004. 'Chronic pain patients are impaired on an emotional decision-making task', <i>Pain</i> , 108: 129-36.                                                                                              | Population: Age <60 yrs.              |
| Arain, A., M. Tammaa, F. Chaudhary, S. Gill, S. Yousuf, N. Bangalore-Vittal, P. Singh, S. Jabeen, S. Ali, Y. Song, and N. J. Azar. 2016. 'Communicating the diagnosis of psychogenic nonepileptic seizures: The patient perspective', <i>Journal of Clinical Neuroscience</i> , 28: 67-70.                                                                   | Population: Age <60 yrs.              |
| Arends, R. Y., C. Bode, E. Taal, and M. A. Van de Laar. 2013. 'The role of goal management for successful adaptation to arthritis', <i>Patient Education &amp; Counseling</i> , 93: 130-8.                                                                                                                                                                   | Population: Not multimorbid           |
| Arora, N. K., B. B. Reeve, R. D. Hays, S. B. Clauser, and I. Oakley-Girvan. 2011. 'Assessment of quality of cancer-related follow-up care from the cancer survivor's perspective', <i>Journal of Clinical Oncology</i> , 29: 1280-9.                                                                                                                         | Population: Not multimorbid           |
| Aspinall, P. A., Z. K. Johnson, A. Azuara-Blanco, A. Montarzino, R. Brice, and A. Vickers. 2008. 'Evaluation of quality of life and priorities of patients with glaucoma', <i>Investigative Ophthalmology and Visual Science</i> , 49: 1907-15.                                                                                                              | Population: Not multimorbid           |
| Audulv, Å, K. Norbergh, K. Asplund, and Å Hörnsten. 2009. 'An ongoing process of inner negotiation -- a Grounded Theory study of self-management among people living with chronic illness', <i>Journal of Nursing &amp; Healthcare of Chronic Illnesses</i> , 1: 283-93.                                                                                     | Population: Age <60 yrs.              |
| Auerbach, A. D., R. Katz, S. Z. Pantilat, R. Bernacki, J. Schnipper, P. Kaboli, T. Wetterneck, D. Gonzales, V. Arora, J. Zhang, and D. Meltzer. 2008. 'Factors associated with discussion of care plans and code status at the time of hospital admission: Results from the Multicenter Hospitalist Study', <i>Journal of Hospital Medicine</i> , 3: 437-45. | Outcome: Preferences not addressed    |
| Bagge, M., J. Tordoff, P. Norris, and S. Heydon. 2013. 'Older people's attitudes towards their regular medicines', <i>J Prim Health Care</i> , 5: 234-42.                                                                                                                                                                                                    | Outcome: Preferences not addressed    |
| Baijal, G., T. Gupta, C. Hotwani, S. G. Laskar, A. Budrukkar, V. Murthy, and J. P. Agarwal. 2012. 'Impact of comorbidity on therapeutic decision-making in head and neck cancer: audit from a comprehensive cancer center in India', <i>Head &amp; Neck</i> , 34: 1251-4.                                                                                    | Population: Age <60 yrs.              |
| Baker, Tamara A., Melissa L. O'Connor, Rosalyn Roker, and Jessica L. Krok. 2013. 'Satisfaction With Pain Treatment in Older Cancer Patients', <i>Journal of Hospice &amp; Palliative Nursing</i> , 15: 455-63.                                                                                                                                               | Outcome: Preferences not addressed    |

|                                                                                                                                                                                                                                                                                                   |                                       |
|---------------------------------------------------------------------------------------------------------------------------------------------------------------------------------------------------------------------------------------------------------------------------------------------------|---------------------------------------|
| Ballantyne, P. J., M. A. M. Gignac, and G. A. Hawker. 2007. 'A patient-centered perspective on surgery avoidance for hip or knee arthritis: Lessons for the future', <i>Arthritis Care and Research</i> , 57: 27-34.                                                                              | Outcome: Preferences not addressed    |
| Bardai, A., S. H. M. Brown, U. Hafeez, and A. H. Abdelhafiz. 2013. 'Survey exploring elderly patients' viewpoints of the multi-compartment compliance aids', <i>Age and Ageing</i> , 2): ii5.                                                                                                     | Document type: Conference proceedings |
| Barron, J., M. Bedra, J. Wood, and J. Finkelstein. 2014. 'Exploring three perspectives on feasibility of a patient portal for older adults', <i>Studies in health technology and informatics</i> , 202: 181-84.                                                                                   | Outcome: Preferences not addressed    |
| Bartlett Ellis, Rebecca J., and Janet L. Welch. 2017. 'Medication-taking behaviours in chronic kidney disease with multiple chronic conditions: a meta-ethnographic synthesis of qualitative studies', <i>Journal of Clinical Nursing</i> , 26: 586-98.                                           | Document type: Editorials & reviews   |
| Bayliss, E. A., J. F. Steiner, D. H. Fernald, L. A. Crane, and D. S. Main. 2003. 'Descriptions of barriers to self-care by persons with comorbid chronic diseases', <i>Ann Fam Med</i> , 1: 15-21.                                                                                                | Outcome: Preferences not addressed    |
| Beaulaurier, R. L., M. J. Mintzer, D. T. D'Amore, and M. Torres. 2016. 'Social factors in non-urgent use of an emergency department by the elderly', <i>Journal of the American Geriatrics Society</i> , 1): S191-S92.                                                                            | Document type: Conference proceedings |
| Bell, S. P., and A. Saraf. 2014. 'Risk stratification in very old adults: How to best gauge risk as the basis of management choices for patients aged over 80', <i>Progress in Cardiovascular Diseases</i> , 57: 197-203.                                                                         | Outcome: Preferences not addressed    |
| Benham-Hutchins, M., N. Stagers, M. Mackert, A. H. Johnson, and D. deBronkart. 2017. "'I want to know everything": a qualitative study of perspectives from patients with chronic diseases on sharing health information during hospitalization', <i>BMC Health Services Research</i> , 17: 529.  | Population: Age <60 yrs.              |
| Bennahum, D. A., W. B. Forman, B. Vellas, and I. L. Albarede. 1997. 'Life expectancy, comorbidity, and quality of life - A framework of reference for medical decisions', <i>Clinics in Geriatric Medicine</i> , 13: 33-&.                                                                        | Document type: Editorials & reviews   |
| Benson, J., and N. Britten. 2002. 'Patients' decisions about whether or not to take antihypertensive drugs: qualitative study', <i>British Medical Journal</i> , 325: 873-76A.                                                                                                                    | Population: Not multimorbid           |
| Bergin, R., J. Emery, R. Bollard, and V. White. 2017. 'How rural and urban patients in Australia with colorectal or breast cancer experience choice of treatment provider: A qualitative study', <i>European Journal of Cancer Care</i> , 26: n/a-n/a.                                            | Population: Not multimorbid           |
| Berna, F., A. S. Goritz, P. M. Llorca, P. Vidailhet, G. Fond, and S. Moritz. 2017. 'Would I take antipsychotics, if I had psychotic symptoms? Examining determinants of the decision to take antipsychotics', <i>Progress in Neuro-Psychopharmacology and Biological Psychiatry</i> , 77: 155-63. | Population: Age <60 yrs.              |
| Berner, Y. N. 2018. '[Patient Oriented Care in Chronic Conditions]', <i>Harefuah</i> , 157: 228-31.                                                                                                                                                                                               | Outcome: Preferences not addressed    |
| Beverly, E. A., L. A. Wray, C. J. Chiu, and C. L. LaCoe. 2014. 'Older Adults' Perceived Challenges With Health Care Providers Treating Their Type 2 Diabetes and Comorbid Conditions', <i>Cd (Clinical Diabetes)</i> , 32: 12-7.                                                                  | Outcome: Preferences not addressed    |

|                                                                                                                                                                                                                                                                                                                                                                                                 |                                     |
|-------------------------------------------------------------------------------------------------------------------------------------------------------------------------------------------------------------------------------------------------------------------------------------------------------------------------------------------------------------------------------------------------|-------------------------------------|
| Blackhall, L. J., S. T. Murphy, G. Frank, V. Michel, and S. Azen. 1995. 'ETHNICITY AND ATTITUDES TOWARD PATIENT AUTONOMY', <i>Jama-Journal of the American Medical Association</i> , 274: 820-25.                                                                                                                                                                                               | Population: Not multimorbid         |
| Bleicher, R. J., P. Abrahamse, S. T. Hawley, S. J. Katz, and M. Morrow. 2008. 'The influence of age on the breast surgery decision-making process', <i>Annals of Surgical Oncology</i> , 15: 854-62.                                                                                                                                                                                            | Population: Not multimorbid         |
| Blom, J. W., M. El Azzi, D. M. Wopereis, L. Glynn, C. Muth, and M. L. van Driel. 2015. 'Reporting of patient-centred outcomes in heart failure trials: are patient preferences being ignored?', <i>Heart Failure Reviews</i> , 20: 385-92.                                                                                                                                                      | Outcome: Preferences not addressed  |
| Blome, C., A. Costanzo, E. Dauden, C. Ferrandiz, G. Girolomoni, R. Gniadecki, L. Iversen, A. Menter, K. Michaelis-Wittern, A. Morita, H. Nakagawa, K. Reich, and M. Augustin. 2016. 'Patient-relevant needs and treatment goals in nail psoriasis', <i>Quality of Life Research: An International Journal of Quality of Life Aspects of Treatment, Care &amp; Rehabilitation</i> , 25: 1179-88. | Population: Age <60 yrs.            |
| Boehmer, K. R., A. Abu Dabrh, M. R. Gionfriddo, P. Erwin, and V. M. Montori. 2018. 'Does the chronic care model meet the emerging needs of people living with multimorbidity? A systematic review and thematic synthesis', <i>PLoS ONE</i> , 13: 17.                                                                                                                                            | Document type: Editorials & reviews |
| Boeni, F., K. E. Hersberger, and I. Arnet. 2014. 'Multidrug punch cards in primary care: A mixed methods study on patients' preferences and impact on adherence', <i>Frontiers in Pharmacology</i> , 5 (SEP) (no pagination).                                                                                                                                                                   | Outcome: Preferences not addressed  |
| Bokhof, B., and U. Junius-Walker. 2016. 'Reducing Polypharmacy from the Perspectives of General Practitioners and Older Patients: A Synthesis of Qualitative Studies', <i>Drugs and Aging</i> , 33: 249-66.                                                                                                                                                                                     | Document type: Editorials & reviews |
| Bonney, A., S. C. Jones, and D. Iverson. 2012. 'The older patient, the general practitioner and the trainee: patients' attitudes and implications for training', <i>Education for primary care : an official publication of the Association of Course Organisers, National Association of GP Tutors, World Organisation of Family Doctors</i> , 23: 186-95.                                     | Population: Not multimorbid         |
| Bonney, A., S. C. Jones, L. Phillipson, and D. Iverson. 2010. 'General practice registrars - attitudes of older patients', <i>Australian Family Physician</i> , 39: 419-24.                                                                                                                                                                                                                     | Population: Not multimorbid         |
| Borgsteede, S. D., L. Deliens, C. Graafland-Riedstra, A. L. Francke, G. van der Wal, and D. L. Willems. 2007. 'Communication about euthanasia in general practice: opinions and experiences of patients and their general practitioners', <i>Patient Educ Couns</i> , 66: 156-61.                                                                                                               | Outcome: Preferences not addressed  |
| Borum, M. L., J. Lynn, and Z. Zhong. 2000. 'Blood transfusion administration in seriously ill patients: an evaluation of SUPPORT data. Study to Understand Prognoses and Preferences for Outcomes and Risks of Treatments', <i>Journal of the American Geriatrics Society</i> , 48: S39-43.                                                                                                     | Population: Not multimorbid         |
| Bove, A. M., A. D. Lynch, C. Ammendolia, and M. Schneider. 2018. 'Patients' experience with nonsurgical treatment for lumbar spinal stenosis: a qualitative study', <i>Spine Journal: Official Journal of the North American Spine Society</i> , 18: 639-47.                                                                                                                                    | Population: Not multimorbid         |
| Bower, P. 2013. 'Multimorbidity in patients with arthritis: Experience of care and self-management', <i>Rheumatology (United Kingdom)</i> , 1): i3.                                                                                                                                                                                                                                             | Duplicates                          |

|                                                                                                                                                                                                                                                                                                                                                         |                                       |
|---------------------------------------------------------------------------------------------------------------------------------------------------------------------------------------------------------------------------------------------------------------------------------------------------------------------------------------------------------|---------------------------------------|
| Bower, P., M. Hann, J. Rick, K. Rowe, J. Burt, M. Roland, J. Protheroe, G. Richardson, and D. Reeves. 2013. 'Multimorbidity and delivery of care for long-term conditions in the English National Health Service: baseline data from a cohort study', <i>Journal of health services research &amp; policy</i> , 18: 29-37.                              | Outcome: Preferences not addressed    |
| Bowling, A., and S. Ebrahim. 2001. 'Measuring patients' preferences for treatment and perceptions of risk', <i>Quality in Health Care</i> , 10: 12-18.                                                                                                                                                                                                  | Document type: Editorials & reviews   |
| Brabers, A. E. M., T. E. M. van Esch, P. P. Groenewegen, K. Hek, P. Mullenders, L. van Dijk, and J. D. de Jong. 2018. 'Is there a conflict between general practitioners applying guidelines for antibiotic prescribing and including their patients' preferences?', <i>Patient Preference and Adherence</i> , 12: 9-19.                                | Population: Age <60 yrs.              |
| Bratzke, L. C., R. J. Muehrer, K. A. Kehl, K. S. Lee, E. C. Ward, and K. L. Kwekkeboom. 2015. 'Self-management priority setting and decision-making in adults with multimorbidity: A narrative review of literature', <i>International Journal of Nursing Studies</i> , 52: 744-55.                                                                     | Document type: Editorials & reviews   |
| Brazier, J. E., D. Rowen, I. Mavranouzouli, A. Tsuchiya, T. Young, Y. Yang, M. Barkham, and R. Ibbotson. 2012. 'Developing and testing methods for deriving preference-based measures of health from condition-specific measures (and other patient-based measures of outcome)', <i>Health technology assessment (Winchester, England)</i> , 16: 1-114. | Population: Not multimorbid           |
| Bridges, J., J. Hughes, N. Farrington, and A. Richardson. 2015. 'Cancer treatment decision-making processes for older patients with complex needs: a qualitative study', <i>BMJ Open</i> , 5: e009674.                                                                                                                                                  | Population: Age <60 yrs.              |
| Brimblecombe, C., D. Crosbie, W. K. Lim, and B. Hayes. 2014. 'The goals of patient care project: Implementing a proactive approach to patient-centred decision-making', <i>Internal Medicine Journal</i> , 44: 961-66.                                                                                                                                  | Outcome: Preferences not addressed    |
| Burke, J. A., M. Earley, L. D. Dixon, A. Wilke, and S. Puczynski. 2006. 'Patients with diabetes speak: Exploring the implications of patients' perspectives for their diabetes appointments', <i>Health Communication</i> , 19: 103-14.                                                                                                                 | Population: Age <60 yrs.              |
| Burkiewicz, J. S., K. S. Vesta, and A. L. Hume. 2008. 'Improving effectiveness in communicating risk to patients', <i>Consultant Pharmacist</i> , 23: 37-43.                                                                                                                                                                                            | Outcome: Preferences not addressed    |
| Burton, M., F. Armitage, K. Collins, P. Richards, A. Nettleship, K. Lifford, and L. Wyld. 2016. 'The development of an on-line decision tool for health care professionals to aid collaborative decision making with older women with breast cancer', <i>European Journal of Cancer</i> , 2): S136.                                                     | Outcome: Preferences not addressed    |
| Buttery, A., K. Lowton, K. Glaser, and G. Carr-White. 2011. 'Older heart failure patients' preferences for cardiac rehabilitation service models', <i>European Heart Journal</i> , 1): 159.                                                                                                                                                             | Document type: Conference proceedings |
| Calpin, P., A. Imran, and D. Harmon. 2017. 'A Comparison of Expectations of Physicians and Patients with Chronic Pain for Pain Clinic Visits', <i>Pain Practice</i> , 17: 305-11.                                                                                                                                                                       | Population: Age <60 yrs.              |
| Camacho, D., E. Estrada, I. T. Lagomasino, and J. Green. 2015. 'Depression treatment adherence and preferences among older latinos in a specialty geriatric clinic', <i>American Journal of Geriatric Psychiatry</i> , 1): S136-S37.                                                                                                                    | Document type: Conference proceedings |

|                                                                                                                                                                                                                                                                                                                                                                                                                                                                                                           |                                       |
|-----------------------------------------------------------------------------------------------------------------------------------------------------------------------------------------------------------------------------------------------------------------------------------------------------------------------------------------------------------------------------------------------------------------------------------------------------------------------------------------------------------|---------------------------------------|
| Campbell, S. M., C. Gately, and L. Gask. 2007. 'Identifying the patient perspective of the quality of mental healthcare for common chronic problems: A qualitative study', <i>Chronic Illness</i> , 3: 46-65.                                                                                                                                                                                                                                                                                             | Population: Age <60 yrs.              |
| Carlin, C. S., J. B. Christianson, P. Keenan, and M. Finch. 2012. 'Chronic illness and patient satisfaction', <i>Health Services Research</i> , 47: 2250-72.                                                                                                                                                                                                                                                                                                                                              | Population: Age <60 yrs.              |
| Caron-Flinterman, J. F., J. E. W. Broerse, J. Teerling, and J. F. G. Bunders. 2005. 'Patients' priorities concerning health research: The case of asthma and COPD research in the Netherlands', <i>Health Expectations</i> , 8: 253-63.                                                                                                                                                                                                                                                                   | Population: Age <60 yrs.              |
| Case, S. M., J. O'Leary, N. Kim, M. E. Tinetti, and T. R. Fried. 2014. 'Relationship between universal health outcome priorities and willingness to take medication for primary prevention of myocardial infarction', <i>Journal of the American Geriatrics Society</i> , 62: 1753-58.                                                                                                                                                                                                                    | Outcome: Preferences not addressed    |
| Case, S. M., V. R. Towle, and T. R. Fried. 2013. 'Considering the balance: Development of a scale to assess patient views on trade-offs in competing health outcomes', <i>Journal of the American Geriatrics Society</i> , 61: 1331-36.                                                                                                                                                                                                                                                                   | Outcome: Preferences not addressed    |
| Cassimatis, Mandy, David J. Kavanagh, and Anthony C. Smith. 2014. 'Perceived needs for supported self-management of type 2 diabetes: A qualitative investigation of the potential for a web-based intervention', <i>Australian Psychologist</i> , 49: 75-85.                                                                                                                                                                                                                                              | Population: Age <60 yrs.              |
| Caughey, G. E., E. Huynh, S. Shakib, J. M. Rose, and J. Swait. 2017. 'Influence of medication risks and benefits on patient and clinician preferences for treatment in multimorbidity: A discrete-choice experiment', <i>Pharmacoepidemiology and Drug Safety</i> , 26 (Supplement 2): 447.                                                                                                                                                                                                               | Document type: Conference proceedings |
| Chang, Wenhong, and Changxiang Chen. 2016. 'Survey of medical treatment and medication status and satisfaction of elderly patients with chronic diseases in Hebei province', <i>Chinese Nursing Research</i> , 30: 22-26.                                                                                                                                                                                                                                                                                 | Outcome: Preferences not addressed    |
| Charette, Susan L., Maristela Baruz Garcia, David B. Reuben, Benjamin A. Bensadon, and Benjamin A. Bensadon. 2015. 'Goal-oriented care': 1-19.                                                                                                                                                                                                                                                                                                                                                            | Document type: Editorials & reviews   |
| Chekerov, R., P. Harter, S. Fuxius, L. C. Hanker, L. Woelber, L. Muller, P. Klare, W. Abenhardt, Y. Nedkova, I. Yalcinkaya, G. Heinrich, H. Sommer, S. Mahner, P. Wimberger, D. Koensgen-Mustea, R. Richter, G. Oskay-Oezcelik, and J. Sehouli. 2017. 'Preference of elderly patients' to oral or intravenous chemotherapy in heavily pre-treated recurrent ovarian cancer: final results of a prospective multicenter trial', <i>Gynecologic Oncology Research and Practice</i> , 4 (1) (no pagination). | Population: Not multimorbid           |
| Chen, H., W. E. Haley, B. E. Robinson, and R. S. Schonwetter. 2003. 'Decisions for hospice care in patients with advanced cancer', <i>Journal of the American Geriatrics Society</i> , 51: 789-97.                                                                                                                                                                                                                                                                                                        | Population: Not multimorbid           |
| Chen, T. T., T. H. Tung, Y. S. Hsueh, M. H. Tsai, H. M. Liang, K. L. Li, K. P. Chung, and C. H. Tang. 2015. 'Measuring Preferences for a Diabetes Pay-for-Performance for Patient (P4P4P) Program using a Discrete Choice Experiment', <i>Value in Health</i> , 18: 578-86.                                                                                                                                                                                                                               | Population: Not multimorbid           |
| Cheong, L. H., C. L. Armour, and S. Z. Bosnic-Anticevich. 2013. 'Multidisciplinary collaboration in primary care: through the eyes of patients', <i>Australian Journal of Primary Health</i> , 19: 190-7.                                                                                                                                                                                                                                                                                                 | Population: Age <60 yrs.              |

|                                                                                                                                                                                                                                                                                                                                    |                                                    |
|------------------------------------------------------------------------------------------------------------------------------------------------------------------------------------------------------------------------------------------------------------------------------------------------------------------------------------|----------------------------------------------------|
| Chia, Y., X. H. Low, A. Chan, and K. Yap. 2012. 'Improving drug-related problems in oncology through technology: Preferences of Asian patients with cancer', <i>International Journal of Pharmacy Practice</i> , 2): 32.                                                                                                           | Population: Not multimorbid                        |
| Chow, A., J. Presseau, I. Perelman, L. Sikora, and D. Fergusson. 2018. 'Personal goal-setting among women living with breast cancer: protocol for a scoping review', <i>Syst Rev</i> , 7: 132.                                                                                                                                     | Population: Not multimorbid                        |
| Chow, A., J. Presseau, I. Perelman, L. Sikora, and D. Fergusson. 2018. 'Personal goal-setting among women living with breast cancer: protocol for a scoping review', <i>Syst Rev</i> , 7: 132.                                                                                                                                     | Document type: Study protocols                     |
| Chung, G. S., R. E. Lawrence, F. A. Curlin, V. Arora, and D. O. Meltzer. 2012. 'Predictors of hospitalised patients' preferences for physician-directed medical decision-making', <i>Journal of Medical Ethics</i> , 38: 77-82.                                                                                                    | Population: Age <60 yrs.                           |
| Clancy, C. M., R. D. Cebul, and S. V. Williams. 1988. 'GUIDING INDIVIDUAL DECISIONS - A RANDOMIZED, CONTROLLED TRIAL OF DECISION-ANALYSIS', <i>American Journal of Medicine</i> , 84: 283-88.                                                                                                                                      | Outcome: Preferences from physicians or caregivers |
| Clarke, G., E. Fistein, A. Holland, M. Barclay, P. Theimann, and S. Barclay. 2017. 'Preferences for care towards the end of life when decision-making capacity may be impaired: A large scale cross-sectional survey of public attitudes in Great Britain and the United States', <i>PLoS ONE</i> , 12: 18.                        | Population: Not multimorbid                        |
| Clarke, L. H., E. V. Bennett, and A. Korotchenko. 2014. 'Negotiating vulnerabilities: how older adults with multiple chronic conditions interact with physicians', <i>Canadian journal on aging = La revue canadienne du vieillissement</i> , 33: 26-37.                                                                           | Outcome: Preferences not addressed                 |
| Clarke, M. G., K. P. Kennedy, and R. P. MacDonagh. 2008. 'Discussing life expectancy with surgical patients: Do patients want to know and how should this information be delivered?', <i>BMC Medical Informatics and Decision Making</i> , 8 (no pagination).                                                                      | Population: Not multimorbid                        |
| Clausen, G., M. Borchelt, C. Janssen, S. Loos, L. Mull, and H. Pfaff. 2006. '[Patient satisfaction and geriatric care - an empirical study]', <i>Zeitschrift fur Gerontologie und Geriatrie</i> , 39: 48-56.                                                                                                                       | Population: Not multimorbid                        |
| Clement, N. D., and R. Burnett. 2013. 'Patient satisfaction after total knee arthroplasty is affected by their general physical well-being', <i>Knee Surgery, Sports Traumatology, Arthroscopy</i> , 21: 2638-46.                                                                                                                  | Outcome: Preferences not addressed                 |
| Clement, N. D., D. Macdonald, R. Burnett, A. H. R. W. Simpson, and C. R. Howie. 2017. 'A patient's perception of their hospital stay influences the functional outcome and satisfaction of total knee arthroplasty', <i>Archives of Orthopaedic and Trauma Surgery</i> , 137: 693-700.                                             | Outcome: Preferences not addressed                 |
| Clever, S. L., L. Jin, W. Levinson, and D. O. Meltzer. 2008. 'Does doctor-patient communication affect patient satisfaction with hospital care? Results of an analysis with a novel instrumental variable', <i>Health Services Research</i> , 43: 1505-19.                                                                         | Population: Age <60 yrs.                           |
| Clough-Gorr, K. M., L. Noti, P. Brauchli, R. Cathomas, M. R. Fried, G. Roberts, A. E. Stuck, F. Hitz, and U. Mey. 2013. 'The SAKK cancer-specific geriatric assessment (C-SGA): a pilot study of a brief tool for clinical decision-making in older cancer patients', <i>BMC Medical Informatics and Decision Making</i> , 13: 93. | Outcome: Preferences not addressed                 |

|                                                                                                                                                                                                                                                                                                                                                                                                                                                                                       |                                       |
|---------------------------------------------------------------------------------------------------------------------------------------------------------------------------------------------------------------------------------------------------------------------------------------------------------------------------------------------------------------------------------------------------------------------------------------------------------------------------------------|---------------------------------------|
| Clyne, B., J. A. Cooper, F. Boland, C. M. Hughes, T. Fahey, S. M. Smith, and team Opti-Script study. 2017. 'Beliefs about prescribed medication among older patients with polypharmacy: a mixed methods study in primary care', <i>British Journal of General Practice</i> , 67: e507-e18.                                                                                                                                                                                            | Outcome: Preferences not addressed    |
| Col, N. F., L. Ngo, J. M. Fortin, R. J. Goldberg, and A. M. O'Connor. 2007. 'Can computerized decision support help patients make complex treatment decisions? A randomized controlled trial of an individualized menopause decision aid', <i>Medical Decision Making</i> , 27: 585-98.                                                                                                                                                                                               | Population: Age <60 yrs.              |
| Combes, G., K. Sein, and K. Allen. 2017. 'How does pre-dialysis education need to change? Findings from a qualitative study with staff and patients', <i>BMC Nephrology</i> , 18 (1) (no pagination).                                                                                                                                                                                                                                                                                 | Population: Not multimorbid           |
| Commisso, E., K. S. McGilton, A. P. Ayala, M. K. Andrew, H. Bergman, L. Beaudet, V. Dube, M. Gray, L. Hale, M. Keatings, E. G. Marshall, J. McElhaney, D. Morgan, E. Parrott, J. Ploeg, T. Sampalli, D. Stephens, I. Vedel, J. Walker, W. P. Wodchis, and M. T. E. Puts. 2017. 'Identifying and understanding the health and social care needs of older adults with multiple chronic conditions and their caregivers: a protocol for a scoping review', <i>BMJ Open</i> , 7: e018247. | Document type: Study protocols        |
| Cooper, V., J. Clatworthy, E. Youssef, C. Llewellyn, A. Miners, M. Lagarde, M. Sachikonye, N. Perry, E. Nixon, A. Pollard, C. Sabin, C. Foreman, and M. Fisher. 2016. 'Which aspects of health care are most valued by people living with HIV in high-income countries? A systematic review', <i>BMC Health Services Research</i> , 16: 677.                                                                                                                                          | Population: Age <60 yrs.              |
| Cooper, V., J. Clatworthy, E. Youssef, N. Perry, E. Nixon, M. Fisher, A. Pollard, C. Llewellyn, A. Miners, M. Lagarde, M. Sachikonye, C. Sabin, and C. Foreman. 2015. 'What aspects of health care are most valued by people living with HIV? Results of a systematic review', <i>HIV Medicine</i> , 2): 74.                                                                                                                                                                          | Population: Age <60 yrs.              |
| Courtin, S., T. Hughes, E. Giovannetti, J. Wolff, C. Rand, and C. Boyd. 2011. 'Experiences of treatment burden in community-dwelling multimorbid older adults and caregivers', <i>Journal of the American Geriatrics Society</i> , 1): S88.                                                                                                                                                                                                                                           | Document type: Conference proceedings |
| Coventry, P. A., N. Small, M. Panagioti, I. Adeyemi and P. Bee. 2015. 'Living with complexity; marshalling resources: a systematic review and qualitative meta-synthesis of lived experience of mental and physical multimorbidity', <i>BMC Family Practice</i> , 16):171                                                                                                                                                                                                             | Document type: Editorials & reviews   |
| Coxon, D., M. Frisher, C. Jinks, K. Jordan, Z. Paskins, and G. Peat. 2015. 'The relative importance of perceived doctor's attitude on the decision to consult for symptomatic osteoarthritis: a choice-based conjoint analysis study', <i>BMJ Open</i> , 5: e009625.                                                                                                                                                                                                                  | Population: Not multimorbid           |
| Coyle, J., and B. Williams. 2001. 'Valuing people as individuals: development of an instrument through a survey of person-centredness in secondary care', <i>Journal of Advanced Nursing</i> , 36: 450-59.                                                                                                                                                                                                                                                                            | Population: Age <60 yrs.              |
| Craftman, A. G., M. Westerbotn, E. von Strauss, P. Hilleras, and L. M. Hammar. 2015. 'Older people's experience of utilisation and administration of medicines in a health- and social care context', <i>Scandinavian Journal of Caring Sciences</i> , 29: 760-68.                                                                                                                                                                                                                    | Outcome: Preferences not addressed    |
| Cybulski, M., L. Cybulski, E. Krajewska-Kulak, M. Orzechowska, and U. Cwalina. 2018. 'Preferences and attitudes of older adults of Bialystok, Poland toward the use of over-the-counter drugs', <i>Clinical Interventions in Aging</i> , 13: 623-32.                                                                                                                                                                                                                                  | Population: Not multimorbid           |



|                                                                                                                                                                                                                                                                                                                                                                                                   |                                       |
|---------------------------------------------------------------------------------------------------------------------------------------------------------------------------------------------------------------------------------------------------------------------------------------------------------------------------------------------------------------------------------------------------|---------------------------------------|
| Cykert, S., P. Dilworth-Anderson, M. H. Monroe, P. Walker, F. R. McGuire, G. Corbie-Smith, L. J. Edwards, and A. J. Bunton. 2010. 'Factors associated with decisions to undergo surgery among patients with newly diagnosed early-stage lung cancer', <i>JAMA</i> , 303: 2368-76.                                                                                                                 | Population: Not multimorbid           |
| Damm, K., J. Volk, A. Horn, J. P. Allam, N. Troensegaard-Petersen, N. Serup-Hansen, T. Winkler, I. Thiessen, K. Borchert, E. G. Wustenberg, and T. Mittendorf. 2016. 'Patient preferences in allergy immunotherapy (AIT) in Germany - a discrete-choice-experiment', <i>Health Economics Review</i> , 6 (1) (no pagination).                                                                      | Population: Age <60 yrs.              |
| Danis, M., J. Garrett, R. Harris, and D. L. Patrick. 1994. 'STABILITY OF CHOICES ABOUT LIFE-SUSTAINING TREATMENTS', <i>Annals of Internal Medicine</i> , 120: 567-73.                                                                                                                                                                                                                             | Population: Not multimorbid           |
| Dattalo, M., C. E. Boulton, S. Wegener, E. Rand-Giovanetti, L. Reider, and K. Frey. 2010. 'Individual and contextual factors that influence multi-morbid older adults' participation in chronic disease self-management (CDSM) programs', <i>Journal of the American Geriatrics Society</i> , 1): S167.                                                                                           | Document type: Conference proceedings |
| Dattalo, M., E. R. Giovanetti, D. Scharfstein, C. Boulton, S. Wegener, J. L. Wolff, B. Leff, K. D. Frick, L. Reider, K. Frey, G. Noronha, and C. Boyd. 2012. 'Who participates in Chronic Disease Self-management (CDSM) programs? Differences between participants and nonparticipants in a population of multimorbid older adults', <i>Medical Care</i> , 50: 1071-75.                          | Outcome: Preferences not addressed    |
| Dattalo, M., K. Kennelty, E. Chapman, A. Gilmore-Bykovskiy, J. Loosen, E. Schmitz, M. F. Wyman, N. Rogus-Pulia, N. Werner, A. J. Kind, and B. Bowers. 2016. "'I'm not a textbook patient": How being listened to can affect health care trajectories for older adults with multiple chronic conditions and frequent hospitalizations', <i>Journal of General Internal Medicine</i> , 1): S85-S86. | Document type: Conference proceedings |
| Dautzenberg, P. L., P. D. Bezemer, S. A. Duursma, R. Schonwetter, and C. Hooyer. 1994. 'The frequency of "do-not-resuscitate" order in aged in-patients: effect of patient- and non-patient-related factors', <i>Netherlands Journal of Medicine</i> , 44: 78-83.                                                                                                                                 | Outcome: Preferences not addressed    |
| Dautzenberg, P. L., S. A. Duursma, P. D. Bezemer, C. Van Engen, R. S. Schonwetter, and C. Hooyer. 1993. 'Resuscitation decisions on a Dutch geriatric ward', <i>Quarterly Journal of Medicine</i> , 86: 535-42.                                                                                                                                                                                   | Outcome: Preferences not addressed    |
| Davison, Sara N., Seija K. Kromm, and Gillian R. Currie. 2010. 'Patient and health professional preferences for organ allocation and procurement, end-of-life care and organization of care for patients with chronic kidney disease using a discrete choice experiment', <i>Nephrology Dialysis Transplantation</i> , 25: 2334-41.                                                               | Population: Age <60 yrs.              |
| De Celis, E. S. P., E. Baltazar-Avalos, L. A. Guadalupe Rocha-Rojo, P. Rojo-Castillo, and Y. C. Guerra. 2016. 'Health information seeking preferences of Mexican cancer survivors: Creating an evidence base for the design of high-quality communication programs', <i>Journal of Clinical Oncology</i> . Conference: ASCO's Quality Care Symposium, 34.                                         | Document type: Conference proceedings |
| de Decker, L., C. Annweiler, C. Launay, B. Fantino, and O. Beauchet. 2014. 'Do not resuscitate orders and aging: impact of multimorbidity on the decision-making process', <i>Journal of Nutrition, Health &amp; Aging</i> , 18: 330-5.                                                                                                                                                           | Document type: Editorials & reviews   |

|                                                                                                                                                                                                                                                                                                                                                                                                                                         |                                                    |
|-----------------------------------------------------------------------------------------------------------------------------------------------------------------------------------------------------------------------------------------------------------------------------------------------------------------------------------------------------------------------------------------------------------------------------------------|----------------------------------------------------|
| de Vos, R., R. W. Koster, and R. J. de Haan. 1998. 'Impact of survival probability, life expectancy, quality of life and patient preferences on do-not-attempt-resuscitation orders in a hospital. Resuscitation Committee', <i>Resuscitation</i> , 39: 15-21.                                                                                                                                                                          | Population: Age <60 yrs.                           |
| De Vos, R., W. Koster R, and R. J. De Haan. 1998. 'Impact of survival probability, life expectancy, quality of life and patient preferences on do-not-attempt-resuscitation orders in a hospital', <i>Resuscitation</i> , 39: 15-21.                                                                                                                                                                                                    | Duplicates                                         |
| Degner, L. F., and J. A. Sloan. 1992. 'DECISION-MAKING DURING SERIOUS ILLNESS - WHAT ROLE DO PATIENTS REALLY WANT TO PLAY', <i>Journal of Clinical Epidemiology</i> , 45: 941-50.                                                                                                                                                                                                                                                       | Population: Age <60 yrs.                           |
| Desbiens, N. A., A. W. Wu, S. K. Broste, N. S. Wenger, A. F. Connors, Jr., J. Lynn, Y. Yasui, R. S. Phillips, and W. Fulkerson. 1996. 'Pain and satisfaction with pain control in seriously ill hospitalized adults: findings from the SUPPORT research investigations. For the SUPPORT investigators. Study to Understand Prognoses and Preferences for Outcomes and Risks of Treatment', <i>Critical Care Medicine</i> , 24: 1953-61. | Outcome: Preferences not addressed                 |
| Deschler, B., T. de Witte, R. Mertelsmann, and M. Lubbert. 2006. 'Treatment decision-making for older patients with high-risk myelodysplastic syndrome or acute myeloid leukemia: problems and approaches', <i>Haematologica</i> , 91: 1513-22.                                                                                                                                                                                         | Outcome: Preferences from physicians or caregivers |
| Dev, S., R. M. Clare, G. M. Felker, M. Fiuzat, L. Warner Stevenson, and C. M. O'Connor. 2012. 'Link between decisions regarding resuscitation and preferences for quality over length of life with heart failure', <i>European Journal of Heart Failure</i> , 14: 45-53.                                                                                                                                                                | Population: Age <60 yrs.                           |
| Dierckx, K., M. Deveugele, P. Roosen, and I. Devisch. 2013. 'Implementation of shared decision making in physical therapy: observed level of involvement and patient preference', <i>Phys Ther</i> , 93: 1321-30.                                                                                                                                                                                                                       | Population: Age <60 yrs.                           |
| Dima, A., G. T. Lewith, P. Little, R. Moss-Morris, N. E. Foster, and F. L. Bishop. 2013. 'Identifying patients' beliefs about treatments for chronic low back pain in primary care: a focus group study', <i>British Journal of General Practice</i> , 63: e490-8.                                                                                                                                                                      | Population: Not multimorbid                        |
| Dinsmore, J., C. Hannigan, E. Murphy, J. Kuiper, A. Jacobs, S. Smith, and J. Doyle. 2017. 'The impact of carer 'shared (disease management) responsibility' on 'shared decision making' for older persons managing multimorbidity', <i>European Journal of Neurology</i> , 24 (Supplement 1): 763.                                                                                                                                      | Document type: Conference proceedings              |
| Ditto, Peter H., Jill A. Jacobson, William D. Smucker, Joseph H. Danks, and Angela Fagerlin. 2006. 'Context changes choices: A prospective study of the effects of hospitalization on life-sustaining treatment preferences', <i>Medical Decision Making</i> , 26: 313-22.                                                                                                                                                              | Population: Not multimorbid                        |
| Donyai, P., R. Snell, and T. Langran. 2017. 'An evaluation of patient satisfaction with a polypharmacy medication review service conducted by pharmacists in GP practices', <i>International Journal of Pharmacy Practice</i> , 25 (Supplement 1): 45.                                                                                                                                                                                  | Document type: Conference proceedings              |
| Downar, J., T. Luk, R. W. Sibbald, T. Santini, J. Mikhael, H. Berman, and L. Hawryluck. 2011. 'Why do patients agree to a "Do not resuscitate" or "Full code" order? Perspectives of medical inpatients', <i>Journal of General Internal Medicine</i> , 26: 582-7.                                                                                                                                                                      | Population: Not multimorbid                        |
| Drks, and Familien-und Präventivmedizin Paracelsus Medizinische Privatuniversität Institut für Allgemein. 2017. "Pilot-testing of a simple Prioritization-table for managing polypharmacy in Primary Care Patients." In.                                                                                                                                                                                                                | Outcome: Preferences not addressed                 |

|                                                                                                                                                                                                                                                                                                                                                                               |                                                    |
|-------------------------------------------------------------------------------------------------------------------------------------------------------------------------------------------------------------------------------------------------------------------------------------------------------------------------------------------------------------------------------|----------------------------------------------------|
| Drks, and Rehabilitationsforschung Sektion Versorgungsforschung und. 2018. "Availability and Quality of Assessment Instruments on Patient-Centeredness in the Multimorbid Elderly." In.                                                                                                                                                                                       | Outcome: Preferences not addressed                 |
| Ekdahl, A. W., I. Hellstrom, L. Andersson, and M. Friedrichsen. 2012. 'Too complex and time-consuming to fit in! Physicians' experiences of elderly patients and their participation in medical decision making: a grounded theory study', <i>BMJ Open</i> , 2: 7.                                                                                                            | Outcome: Preferences from physicians or caregivers |
| Ekerstad, N., R. Lofmark, D. Andersson, and P. Carlsson. 2011. 'A tentative consensus-based model for priority setting: an example from elderly patients with myocardial infarction and multi-morbidity', <i>Scandinavian journal of public health</i> , 39: 345-53.                                                                                                          | Outcome: Preferences from physicians or caregivers |
| Ernst, J., S. Berger, G. Weißflog, C. Schröder, A. Körner, D. Niederwieser, E. Brähler, and S. Singer. 2013. 'Patient participation in the medical decision-making process in haemato-oncology—A qualitative study', <i>European Journal of Cancer Care</i> , 22: 684-90.                                                                                                     | Population: Age <60 yrs.                           |
| Evans, K. E., T. Kalsi, G. Babic-Illman, and D. Harari. 2014. 'Comorbidities and patient choice are poorly documented in older people undergoing treatment for cancer', <i>European Geriatric Medicine</i> , 1): S143.                                                                                                                                                        | Outcome: Preferences not addressed                 |
| Falun, N., B. Fridlund, M. A. Schaufel, E. Schei, and T. M. Norekval. 2016. 'Patients' goals, resources, and barriers to future change: A qualitative study of patient reflections at hospital discharge after myocardial infarction', <i>European Journal of Cardiovascular Nursing</i> , 15: 495-503.                                                                       | Population: Not multimorbid                        |
| Farin, E., L. Gramm, and E. Schmidt. 2013. 'The patient-physician relationship in patients with chronic low back pain as a predictor of outcomes after rehabilitation', <i>Journal of Behavioral Medicine</i> , 36: 246-58.                                                                                                                                                   | Population: Age <60 yrs.                           |
| Farin, E., L. Gramm, and E. Schmidt. 2013. 'The patient-physician relationship in patients with chronic low back pain as a predictor of outcomes after rehabilitation', <i>Journal of Behavioral Medicine</i> , 36: 246-58.                                                                                                                                                   | Outcome: Preferences not addressed                 |
| Fausser, Michael C. 1999. 'Hospice patient perspectives regarding the implementation of advanced directives', 60: 0410-10.                                                                                                                                                                                                                                                    | Outcome: Preferences not addressed                 |
| Federman, A. D., A. Sanchez-Munoz, L. Jandorf, C. Salmon, M. S. Wolf, and J. Kannry. 2017. 'Patient and clinician perspectives on the outpatient after-visit summary: a qualitative study to inform improvements in visit summary design', <i>Journal of the American Medical Informatics Association : JAMIA</i> , 24: e61-e68.                                              | Population: Not multimorbid                        |
| Fernstrom, K. M., N. D. Shippee, A. L. Jones, and H. R. Britt. 2016. 'Development and validation of a new patient experience tool in patients with serious illness', <i>BMC Palliative Care</i> , 15: 99.                                                                                                                                                                     | Outcome: Preferences not addressed                 |
| Ferris, R., C. Blaum, E. Kiwak, J. Austin, J. Esterson, G. Harkless, G. Oftedahl, M. Parchman, P. H. Van Ness, and M. E. Tinetti. 2017. 'Perspectives of Patients, Clinicians, and Health System Leaders on Changes Needed to Improve the Health Care and Outcomes of Older Adults With Multiple Chronic Conditions', <i>Journal of Aging &amp; Health</i> : 898264317691166. | Outcome: Preferences not addressed                 |
| Filardo, G., A. Roffi, G. Merli, T. Marcacci, F. B. Ceroni, D. Raboni, E. Kon, and M. Marcacci. 2017. 'Patients control preferences and results in knee arthroplasty', <i>Knee Surgery Sports Traumatology Arthroscopy</i> , 25: 552-58.                                                                                                                                      | Population: Not multimorbid                        |

|                                                                                                                                                                                                                                                                                                                                              |                                                    |
|----------------------------------------------------------------------------------------------------------------------------------------------------------------------------------------------------------------------------------------------------------------------------------------------------------------------------------------------|----------------------------------------------------|
| Finkelstein, E., C. Malhotra, J. Chay, S. Ozdemir, A. Chopra, and R. Kanesvaran. 2016. 'Impact of Treatment Subsidies and Cash Payouts on Treatment Choices at the End of Life', <i>Value in Health</i> , 19: 788-94.                                                                                                                        | Population: Age <60 yrs.                           |
| Finney Rutten, L. J., B. W. Hesse, J. L. St. Sauver, P. Wilson, N. Chawla, D. B. Hartigan, R. P. Moser, S. Taplin, R. Glasgow, and N. K. Arora. 2016. 'Health Self-Efficacy Among Populations with Multiple Chronic Conditions: the Value of Patient-Centered Communication', <i>Advances in Therapy</i> , 33: 1440-51.                      | Outcome: Preferences not addressed                 |
| Fischer, M., A. Visser, B. Voerman, B. Garssen, G. van Andel, and J. Bensing. 2006. 'Treatment decision making in prostate cancer: Patients' participation in complex decisions', <i>Patient Education and Counseling</i> , 63: 308-13.                                                                                                      | Population: Not multimorbid                        |
| Fitch, M. 2017. 'Perspectives of older adults regarding decision-making about chemotherapy', <i>Psycho-Oncology</i> , 26 (Supplement 3): 102.                                                                                                                                                                                                | Document type: Conference proceedings              |
| Florin, Jan, Anna Ehrenberg, and Margareta Ehnfors. 2006. 'Patient participation in clinical decision-making in nursing: A comparative study of nurses' and patients' perceptions', <i>Journal of Clinical Nursing</i> , 15: 1498-508.                                                                                                       | Population: Age <60 yrs.                           |
| Florin, Jan, Anna Ehrenberg, and Margareta Ehnfors. 2006. 'Patient participation in clinical decision-making in nursing: A comparative study of nurses' and patients' perceptions', <i>Journal of Clinical Nursing</i> , 15: 1498-508.                                                                                                       | Population: Not multimorbid                        |
| Fortin, M., C. Hudon, F. Gallagher, A. L. Ntetu, D. Maltais, and H. Soubhi. 2010. 'Nurses joining family doctors in primary care practices: perceptions of patients with multimorbidity', <i>BMC Family Practice</i> , 11: 84.                                                                                                               | Outcome: Preferences not addressed                 |
| Fradgley, E. A., C. L. Paul, J. Bryant, I. A. Roos, F. A. Henskens, and D. J. Paul. 2014. 'Consumer participation in quality improvements for chronic disease care: development and evaluation of an interactive patient-centered survey to identify preferred service initiatives', <i>Journal of medical Internet research</i> , 16: e292. | Population: Age <60 yrs.                           |
| Fraenkel, L., D. R. Wittink, J. Concato, and T. Fried. 2004. 'Are preferences for cyclooxygenase-2 inhibitors influenced by the certainty effect?', <i>Journal of Rheumatology</i> , 31: 591-93.                                                                                                                                             | Population: Not multimorbid                        |
| Fraenkel, L., S. T. Bogardus, J. Concato, and D. R. Wittink. 2004. 'Treatment options in knee osteoarthritis - The patient's perspective', <i>Archives of Internal Medicine</i> , 164: 1299-304.                                                                                                                                             | Population: Not multimorbid                        |
| Fraenkel, Liana, Barbara Gulanski, and Dick R. Wittink. 2006. 'Preference for hip protectors among older adults at high risk for osteoporotic fractures', <i>Journal of Rheumatology</i> , 33: 2064-68.                                                                                                                                      | Population: Not multimorbid                        |
| Franco, M. R., K. Howard, C. Sherrington, P. H. Ferreira, J. Rose, J. L. Gomes, and M. L. Ferreira. 2015. 'Eliciting older people's preferences for exercise programs: a best-worst scaling choice experiment', <i>Journal of Physiotherapy</i> , 61: 34-41.                                                                                 | Population: Not multimorbid                        |
| Fried, T. R., M. E. Tinetti, and L. Iannone. 2011. 'Primary care clinicians' experiences with treatment decision making for older persons with multiple conditions', <i>Archives of Internal Medicine</i> , 171: 75-80.                                                                                                                      | Outcome: Preferences from physicians or caregivers |

|                                                                                                                                                                                                                                                                                                                                       |                                       |
|---------------------------------------------------------------------------------------------------------------------------------------------------------------------------------------------------------------------------------------------------------------------------------------------------------------------------------------|---------------------------------------|
| Frost, D. W., D. J. Cook, D. K. Heyland, and R. A. Fowler. 2011. 'Patient and healthcare professional factors influencing end-of-life decision-making during critical illness: A systematic review', <i>Critical Care Medicine</i> , 39: 1174-89.                                                                                     | Outcome: Preferences not addressed    |
| Fuller, L. M., B. Button, B. Tarrant, C. R. Battistuzzo, M. Braithwaite, G. Snell, and A. E. Holland. 2014. 'Patients' expectations and experiences of rehabilitation following lung transplantation', <i>Clinical Transplantation</i> , 28: 252-8.                                                                                   | Population: Age <60 yrs.              |
| Fuller, R., N. Dudley, and J. Blacktop. 2004. 'Avoidance hierarchies and preferences for anticoagulation-semi-qualitative analysis of older patients' views about stroke prevention and the use of warfarin', <i>Age and Ageing</i> , 33: 608-11.                                                                                     | Population: Not multimorbid           |
| Fuller, S. M., K. A. Koester, R. R. Guinness, and W. T. Steward. 2017. 'Patients' Perceptions and Experiences of Shared Decision-Making in Primary HIV Care Clinics', <i>The Journal of the Association of Nurses in AIDS Care: JANAC</i> , 28: 75-84.                                                                                | Population: Age <60 yrs.              |
| Fung, C. H., C. M. Setodji, F. Y. Kung, J. Keeseey, S. M. Asch, J. Adams, and E. A. McGlynn. 2008. 'The relationship between multimorbidity and patients' ratings of communication', <i>J Gen Intern Med</i> , 23: 788-93.                                                                                                            | Population: Age <60 yrs.              |
| Furber, L., S. Bonas, G. Murtagh, and A. Thomas. 2015. 'Patients' experiences of an initial consultation in oncology: knowing and not knowing', <i>British journal of health psychology</i> , 20: 261-73.                                                                                                                             | Population: Age <60 yrs.              |
| Gainer, R. A., J. Curran, K. J. Buth, J. G. David, J. F. Legare, and G. M. Hirsch. 2017. 'Toward Optimal Decision Making among Vulnerable Patients Referred for Cardiac Surgery: A Qualitative Analysis of Patient and Provider Perspectives', <i>Medical Decision Making</i> , 37: 600-10.                                           | Population: Not multimorbid           |
| Gainer, R., J. Begum, E. Wilson-Pease, and G. Hirsch. 2016. 'A formalized shared decision making process with individualized decision aids improves comprehension and decisional quality among frail, elderly cardiac surgery patients', <i>Canadian Journal of Cardiology</i> , 32 (10 Supplement 1): S266-S267.                     | Population: Age <60 yrs.              |
| Gallacher, K., C. R. May, V. M. Montori, and F. S. Mair. 2011. 'Understanding patients' experiences of treatment burden in chronic heart failure using normalization process theory', <i>Ann Fam Med</i> , 9: 235-43.                                                                                                                 | Outcome: Preferences not addressed    |
| Gallagher, J. J., C. C. Lewis, A. Ruane, R. Buckmaster, F. Doyle, S. Sears, T. Morgan, N. Pender, R. G. Sheahan, and B. McAdam. 2015. 'Targeting device acceptance in patients with an ICD: The role of insomnia, PTSD and patients' support preferences', <i>European Journal of Heart Failure</i> , 17: 428.                        | Document type: Conference proceedings |
| Garrett, J. M., R. P. Harris, J. K. Norburn, D. L. Patrick, and M. Danis. 1993. 'LIFE-SUSTAINING TREATMENTS DURING TERMINAL ILLNESS - WHO WANTS WHAT', <i>Journal of General Internal Medicine</i> , 8: 361-68.                                                                                                                       | Population: Not multimorbid           |
| Garrido, M. M., S. T. Harrington, and H. G. Prigerson. 2014. 'End-of-Life Treatment Preferences: A Key to Reducing Ethnic/Racial Disparities in Advance Care Planning?', <i>Cancer</i> , 120: 3981-86.                                                                                                                                | Population: Age <60 yrs.              |
| Gazzard, B., S. Ali, A. Muhlbacher, N. Ghafouri, F. Maggiolo, C. Golics, S. Nozza, M. J. Fuster, A. Antela, J. J. Parienti, N. Dang, S. R. Bregigeon, A. Benzie, and M. Murray. 2014. 'Patient preferences for characteristics of antiretroviral therapies: results from five European countries', <i>J Int AIDS Soc</i> , 17: 19540. | Population: Age <60 yrs.              |

|                                                                                                                                                                                                                                                                                                                  |                                       |
|------------------------------------------------------------------------------------------------------------------------------------------------------------------------------------------------------------------------------------------------------------------------------------------------------------------|---------------------------------------|
| Geok Ling, Lee, Teo Irene, and Ravindran Kanesvaran. 2018. 'The Complexities of Doctor-Patient-Family Communication in an Asian Oncology Setting: Concordance and Discordance Among Patient Preferences, Family Preferences, and Perceived and Actual Communication', <i>Health Communication</i> , 33: 95-101.  | Population: Not multimorbid           |
| Gill, S. D., T. Dunning, F. McKinnon, D. Cook, and J. Bourke. 2014. 'Understanding the experience of inpatient rehabilitation: insights into patient-centred care from patients and family members', <i>Scandinavian Journal of Caring Sciences</i> , 28: 264-72.                                                | Outcome: Preferences not addressed    |
| Gillick, M., S. Berkman, and L. Cullen. 1999. 'A patient-centered approach to advance medical planning in the nursing home', <i>Journal of the American Geriatrics Society</i> , 47: 227-30.                                                                                                                     | Population: Not multimorbid           |
| Gjerset, G. M., S. D. Fossa, K. S. Courneya, E. Skovlund, A. B. Jacobsen, and L. Thorsen. 2011. 'Interest and preferences for exercise counselling and programming among Norwegian cancer survivors', <i>European Journal of Cancer Care</i> , 20: 96-105.                                                       | Population: Age <60 yrs.              |
| Glynn, L. G., A. MacFarlane, and A. W. Murphy. 2007. 'The complexity of patients' satisfaction with out-of-hours care: a qualitative study', <i>European Journal of General Practice</i> , 13: 83-8.                                                                                                             | Population: Age <60 yrs.              |
| Gordon, E. J. 2001. 'Patients' decisions for treatment of end-stage renal disease and their implications for access to transplantation', <i>Social Science &amp; Medicine</i> , 53: 971-87.                                                                                                                      | Population: Age <60 yrs.              |
| Gordon, Janet, Kenneth Rockwood, and Colin Powell. 2000. 'Assessing patients' views of clinical changes', <i>JAMA: Journal of the American Medical Association</i> , 283: 1824-25.                                                                                                                               | Document type: Editorials & reviews   |
| Grace, S. L., J. McDonald, D. Fishman, and V. Caruso. 2005. 'Patient preferences for home-based versus hospital-based cardiac rehabilitation', <i>Journal of Cardiopulmonary Rehabilitation</i> , 25: 24-29.                                                                                                     | Population: Not multimorbid           |
| Granås, A. G., and I. Bates. 2005. 'Patients' understanding and management of their illnesses and prescribed medicines--a descriptive study', <i>Pharmacy World &amp; Science</i> , 27: 321-8.                                                                                                                   | Outcome: Preferences not addressed    |
| Greenhalgh, T., J. Wherton, P. Sugarhood, S. Hinder, R. Procter, and R. Stones. 2013. 'What matters to older people with assisted living needs? A phenomenological analysis of the use and non-use of telehealth and telecare', <i>Social Science &amp; Medicine</i> , 93: 86-94.                                | Outcome: Preferences not addressed    |
| Grudniewicz, A., M. Nelson, K. Kuluski, V. Lui, H. V. Cunningham, J. X. Nie, H. Colquhoun, W. P. Wodchis, S. Taylor, M. Loganathan, and R. E. Upshur. 2016. 'Treatment goal setting for complex patients: Protocol for a scoping review', <i>BMJ Open</i> , 6 (5) (no pagination).                               | Document type: Study protocols        |
| Grudzen, C., S. Stone, S. Mohanty, K. A. Lorenz, J. Torres, J. Ortiz, and S. Timmermans. 2011. '"I want to be taking my own last breath": Patients' reflections on illness when presenting to an emergency department at the end of life (723)', <i>Journal of Pain and Symptom Management</i> , 41 (1): 285-86. | Document type: Conference proceedings |
| Grundberg, A., B. Ebbeskog, S. A. Gustafsson, and D. Religa. 2014. 'Mental health-promoting dialogues from the perspective of community-dwelling seniors with multimorbidity', <i>J Multidiscip Healthc</i> , 7: 189-99.                                                                                         | Outcome: Preferences not addressed    |

|                                                                                                                                                                                                                                                                                                                                            |                                                    |
|--------------------------------------------------------------------------------------------------------------------------------------------------------------------------------------------------------------------------------------------------------------------------------------------------------------------------------------------|----------------------------------------------------|
| Gunturi, N. 2018. 'Patient-centered goals of care: Using the Chronic Care Management (CCM) code towards cooperative goal setting in the multimorbid elderly', <i>Journal of the American Medical Directors Association</i> , 19 (3): B20.                                                                                                  | Document type: Conference proceedings              |
| Hackshaw, M. D., M. Holmes, M. Lankford, M. Thomas, A. Ogbonnaya, and M. Eaddy. 2016. 'Prescribing Preferences in the First-Line Treatment for Patients With Metastatic Renal Cell Carcinoma in the United States', <i>Clinical Genitourinary Cancer</i> , 14: e479-e87.                                                                   | Outcome: Preferences from physicians or caregivers |
| Hall, A. M., P. H. Ferreira, C. G. Maher, J. Latimer, and M. L. Ferreira. 2010. 'The influence of the therapist-patient relationship on treatment outcome in physical rehabilitation: a systematic review', <i>Physical Therapy</i> , 90: 1099-110.                                                                                        | Population: Age <60 yrs.                           |
| Hamann, J., B. Neuner, J. Kasper, A. Vodermaier, A. Loh, A. Deinzer, C. Heesen, W. Kissling, R. Busch, R. Schmieder, C. Spies, C. Caspari, and M. Harter. 2007. 'Participation preferences of patients with acute and chronic conditions', <i>Health Expectations</i> , 10: 358-63.                                                        | Population: Age <60 yrs.                           |
| Hamel, M. B., J. Lynn, J. M. Teno, K. E. Covinsky, A. W. Wu, A. Galanos, N. A. Desbiens, and R. S. Phillips. 2000. 'Age-related differences in care preferences, treatment decisions, and clinical outcomes of seriously ill hospitalized adults: Lessons from SUPPORT', <i>Journal of the American Geriatrics Society</i> , 48: S176-S82. | Document type: Conference proceedings              |
| Hamelinck, V. C., E. Bastiaannet, A. H. Pieterse, C. J. H. van de Velde, G. J. Liefers, and A. M. Stiggelbout. 2018. 'Preferred and Perceived Participation of Younger and Older Patients in Decision Making About Treatment for Early Breast Cancer: A Prospective Study', <i>Clin Breast Cancer</i> , 18: e245-e53.                      | Population: Not multimorbid                        |
| Harder, H., R. Ballinger, C. Langridge, A. Ring, and L. J. Fallowfield. 2013. 'Adjuvant chemotherapy in elderly women with breast cancer: patients' perspectives on information giving and decision making', <i>Psycho-Oncology</i> , 22: 2729-35.                                                                                         | Population: Not multimorbid                        |
| Hauber, A. B., H. Nguyen, J. Posner, I. Kalsekar, and J. Ruggles. 2016. 'A discrete-choice experiment to quantify patient preferences for frequency of glucagon-like peptide-1 receptor agonist injections in the treatment of type 2 diabetes', <i>Current Medical Research &amp; Opinion</i> , 32: 251-62.                               | Population: Not multimorbid                        |
| Hawkins, M., S. D. Gill, R. Batterham, G. R. Elsworth, and R. H. Osborne. 2017. 'The Health Literacy Questionnaire (HLQ) at the patient-clinician interface: a qualitative study of what patients and clinicians mean by their HLQ scores', <i>BMC Health Services Research</i> , 17: 309.                                                 | Population: Age <60 yrs.                           |
| Hawkins, N. A., P. H. Ditto, J. H. Danks, and W. D. Smucker. 2005. 'Micromanaging death: Process preferences, values, and goals in end-of-life medical decision making', <i>Gerontologist</i> , 45: 107-17.                                                                                                                                | Population: Not multimorbid                        |
| Hawley, S. T., and R. Morrison. 2012. 'Achieving high-quality surgical treatment decisions: The perspective of older breast cancer patients', <i>Ageing Health</i> , 8: 589-99.                                                                                                                                                            | Outcome: Preferences not addressed                 |
| Hayes, R. P., and J. T. Fitzgerald. 2009. 'Perceptions and attitudes are primary contributors to insulin delivery system satisfaction in people with type 2 diabetes', <i>Diabetes Technology and Therapeutics</i> , 11: 419-26.                                                                                                           | Population: Age <60 yrs.                           |
| Hedman M., U. Pöder, A.G. Mamhidir A.G., A. Nilsson, M.L. Kristofferzon and E. Häggström. Life memories and the ability to act: the meaning of autonomy and participation for older people when living with chronic illness. <i>Scand J Caring Sci</i> ; 2015; 29; 824–833                                                                 | Population: Not multimorbid                        |

|                                                                                                                                                                                                                                                                                                                                                                                                                                                               |                                     |
|---------------------------------------------------------------------------------------------------------------------------------------------------------------------------------------------------------------------------------------------------------------------------------------------------------------------------------------------------------------------------------------------------------------------------------------------------------------|-------------------------------------|
| Heid, A. R., R. Pruchno, and M. Wilson-Genderson. 2018. 'Illness Representations of Multiple Chronic Conditions and Self-Management Behaviors in Older Adults: A Pilot Study', <i>International Journal of Aging &amp; Human Development</i> , 87: 90-106.                                                                                                                                                                                                    | Outcome: Preferences not addressed  |
| Heisler, M. 2017. 'Eliciting Personal Values of Patients with Multiple Chronic Conditions: Why and How', <i>Journal of General Internal Medicine</i> , 32: 1273-74.                                                                                                                                                                                                                                                                                           | Document type: Editorials & reviews |
| Herber, Oliver Rudolf, Bettina BÜcker, Maria-Inti Metzendorf, and Julie Barroso. 2017. 'A qualitative meta-summary using Sandelowski and Barroso's method for integrating qualitative research to explore barriers and facilitators to self-care in heart failure patients', <i>European Journal of Cardiovascular Nursing</i> , 16: 662-77.                                                                                                                  | Document type: Editorials & reviews |
| Hershkovitz, A., B. M. Rothschild, J. H. Rose, T. Hornick, and E. E. O'Toole. 2001. 'Medical care perceptions in elderly patients with musculoskeletal complaints', <i>Israel Medical Association Journal</i> , 3: 822-27.                                                                                                                                                                                                                                    | Outcome: Preferences not addressed  |
| Hjelm, M., G. Holst, A. Willman, D. Bohman, and J. Kristensson. 2015. 'The work of case managers as experienced by older persons (75+) with multi-morbidity - a focused ethnography', <i>BMC Geriatrics</i> , 15: 168.                                                                                                                                                                                                                                        | Outcome: Preferences not addressed  |
| Hofman, C. S., P. Makai, H. Boter, B. M. Buurman, A. J. de Craen, M. G. M. Rikkert, R. Donders, and R. J. F. Melis. 2015. 'The influence of age on health valuations: the older olds prefer functional independence while the younger olds prefer less morbidity', <i>Clinical Interventions In Aging</i> , 10: 9.                                                                                                                                            | Population: Not multimorbid         |
| Hogden, A., D. Greenfield, P. Nugus, and M. C. Kiernan. 2015. 'Development of a model to guide decision making in amyotrophic lateral sclerosis multidisciplinary care', <i>Health expectations: an international journal of public participation in health care and health policy</i> , 18: 1769-82.                                                                                                                                                         | Population: Not multimorbid         |
| Holmes, E., P. Crome, and A. Arora. 2018. 'Patients' preferences and existential perspective: what to consider and how should patient's expectations be guided?', <i>Aging Clinical and Experimental Research</i> , 30: 271-75.                                                                                                                                                                                                                               | Document type: Editorials & reviews |
| Holmes, H. M., and A. Todd. 2017. 'The Role of Patient Preferences in Deprescribing', <i>Clinics in Geriatric Medicine</i> , 33: 165-75.                                                                                                                                                                                                                                                                                                                      | Document type: Editorials & reviews |
| Hope, K., M. Ferguson, D. P. Reidlinger, and E. Agarwal. 2017. '"I don't eat when I'm sick": Older people's food and mealtime experiences in hospital', <i>Maturitas</i> , 97: 6-13.                                                                                                                                                                                                                                                                          | Population: Not multimorbid         |
| Hopp, F. P., N. Thornton, L. Martin, and R. Zalenski. 2012. 'Life disruption, life continuation: contrasting themes in the lives of African-American elders with advanced heart failure', <i>Soc Work Health Care</i> , 51: 149-72.                                                                                                                                                                                                                           | Outcome: Preferences not addressed  |
| Hopton, A., J. Eldred, and H. MacPherson. 2014. 'Patients' experiences of acupuncture and counselling for depression and comorbid pain: a qualitative study nested within a randomised controlled trial', <i>BMJ Open</i> , 4: e005144.                                                                                                                                                                                                                       | Population: Age <60 yrs.            |
| Hsu, Tina, Matthew Loscalzo, Rupal Ramani, Stephen Forman, Leslie Popplewell, Karen Clark, Vani Katheria, R. E. X. Strowbridge, Redmond Rinehart, D. A. N. Smith, Keith Matthews, Jeff Dillehunt, Feng Tao, David Smith, Canlan Sun, and Arti Hurria. 2017. 'Are Disagreements in Caregiver and Patient Assessment of Patient Health Associated with Increased Caregiver Burden in Caregivers of Older Adults with Cancer?', <i>Oncologist</i> , 22: 1383-91. | Outcome: Preferences not addressed  |



|                                                                                                                                                                                                                                                                                                                         |                                       |
|-------------------------------------------------------------------------------------------------------------------------------------------------------------------------------------------------------------------------------------------------------------------------------------------------------------------------|---------------------------------------|
| Huang, S. H. 2013. 'Challenges in managing elderly cancer patients: A systematic review', <i>Journal of Medical Imaging and Radiation Sciences</i> , 44 (1): 50.                                                                                                                                                        | Outcome: Preferences not addressed    |
| Hullfish, K. L., V. E. Bovbjerg, and W. D. Steers. 2004. 'Patient-centered goals for pelvic floor dysfunction surgery: Long-term follow-up', <i>American Journal of Obstetrics and Gynecology</i> , 191: 201-05.                                                                                                        | Population: Not multimorbid           |
| Hurwitz, L. M., J. Cullen, S. Elsamanoudi, D. J. Kim, J. Hudak, M. Colston, J. Travis, H. C. Kuo, C. R. Porter, and I. L. Rosner. 2016. 'A prospective cohort study of treatment decision-making for prostate cancer following participation in a multidisciplinary clinic', <i>Urologic Oncology</i> , 34: 233.e17-25. | Population: Not multimorbid           |
| Husain, L. S., K. Collins, M. Reed, and L. Wyld. 2008. 'Choices in cancer treatment: a qualitative study of the older women's (>70 years) perspective', <i>Psycho-Oncology</i> , 17: 410-6.                                                                                                                             | Population: Not multimorbid           |
| Ickowicz, E. 2012. 'Patient-centered care for older adults with multiple chronic conditions: A stepwise approach from the American Geriatrics Society: American Geriatrics Society expert panel on the care of older adults with multimorbidity', <i>Journal of the American Geriatrics Society</i> , 60: 1957-68.      | Document type: Editorials & reviews   |
| Isaacs, C. G., C. Kistler, K. M. Hunold, G. F. Pereira, M. Buchbinder, M. A. Weaver, S. A. McLean, and T. F. Platts-Mills. 2013. 'Shared decision-making in the selection of outpatient analgesics for older individuals in the emergency department', <i>Journal of the American Geriatrics Society</i> , 61: 793-98.  | Outcome: Preferences not addressed    |
| Isacson, D., K. Bingsfors, and M. Lindberg. 2004. 'Self-reported Dermatological Problems and Preferences for Health: An Epidemiological Survey', <i>Acta Dermato-Venereologica</i> , 84: 27-31.                                                                                                                         | Population: Age <60 yrs.              |
| Itaya, T., Y. Murakami, A. Ota, E. Nomura, T. Fukushima, and M. Nishigaki. 2018. 'Factors influencing home discharge preference of inpatients with acute cerebral infarction: A retrospective cohort study', <i>Stroke</i> . Conference: American Heart Association/American Stroke Association, 49.                    | Document type: Conference proceedings |
| Iturria Sierra, J. A., and S. Marquez Calderon. 1997. '[Health and social services: needs, preferences and their use by the elderly following hospitalization]', <i>Revista Espanola de Salud Publica</i> , 71: 281-91.                                                                                                 | Population: Not multimorbid           |
| Jacobson, Kristin K. 2014. 'The older adult's experience of treatment and communication with primary care physicians in the medical encounter', 75.                                                                                                                                                                     | Outcome: Preferences not addressed    |
| Jansen, J., J. van Weert, S. van Dulmen, T. Heeren, and J. Bensing. 2007. 'Patient education about treatment in cancer care: an overview of the literature on older patients' needs', <i>Cancer Nursing</i> , 30: 251-60.                                                                                               | Population: Not multimorbid           |
| Jansons, P. S., L. Robins, T. P. Haines, and L. O'Brien. 2018. 'Barriers and enablers to ongoing exercise for people with chronic health conditions: Participants' perspectives following a randomized controlled trial of two interventions', <i>Archives of Gerontology and Geriatrics</i> , 76: 92-99.               | Outcome: Preferences not addressed    |
| Janssen, D. J. A., J. R. Curtis, D. H. Au, M. A. Spruit, L. Downey, J. M. G. A. Schols, E. F. M. Wouters, and R. A. Engelberg. 2011. 'Patient-clinician communication about end-of-life care for Dutch and US patients with COPD', <i>European Respiratory Journal</i> , 38: 268-76.                                    | Outcome: Preferences not addressed    |

|                                                                                                                                                                                                                                                                                                    |                                                    |
|----------------------------------------------------------------------------------------------------------------------------------------------------------------------------------------------------------------------------------------------------------------------------------------------------|----------------------------------------------------|
| Janssen, I. M., A. Gerhardus, G. D. von Gersdorff, C. A. Baldamus, M. Schaller, C. Barth, and F. Scheibler. 2015. 'Preferences of patients undergoing hemodialysis - Results from a questionnaire-based study with 4,518 patients', <i>Patient Preference and Adherence</i> , 9: 847-55.           | Population: Not multimorbid                        |
| Jayanti, A., M. Neuvonen, A. Wearden, J. Morris, P. Foden, P. Brenchley, S. Mitra, G. Wood, J. Mason, S. Reddy, and P. Ande. 2015. 'Healthcare decision-making in end stage renal disease-patient preferences and clinical correlates', <i>BMC Nephrology</i> , 16 (1) (no pagination).            | Population: Age <60 yrs.                           |
| Jennings, L. A., A. Palimaru, M. G. Corona, X. E. Cagigas, K. D. Ramirez, T. Zhao, R. D. Hays, N. S. Wenger, and D. B. Reuben. 2017. 'Patient and caregiver goals for dementia care', <i>Quality of Life Research</i> , 26: 685-93.                                                                | Outcome: Preferences from physicians or caregivers |
| Jerant, A. F., M. M. von Friederichs-Fitzwater, and M. Moore. 2005. 'Patients' perceived barriers to active self-management of chronic conditions', <i>Patient Educ Couns</i> , 57: 300-7.                                                                                                         | Outcome: Preferences not addressed                 |
| Joly, D., D. Anglicheau, C. Alberti, A. T. Nguyen, M. Touam, J. P. Grunfeld, and P. Jungers. 2003. 'Octogenarians reaching end-stage renal disease: Cohort study of decision-making and clinical outcomes', <i>Journal of the American Society of Nephrology</i> , 14: 1012-21.                    | Outcome: Preferences not addressed                 |
| Joubert, A., A. Kidd-Taylor, G. Christopher, J. Nanda, R. Warren, I. Lindong, and Y. Bronner. 2010. 'Complementary and alternative medical practice: self-care preferred vs. practitioner-based care among patients with asthma', <i>Journal of the National Medical Association</i> , 102: 562-9. | Population: Age <60 yrs.                           |
| Kamradt, M., J. Krisam, M. Kiel, M. Qreini, W. Besier, J. Szecsenyi, and D. Ose. 2017. 'Health-Related Quality of Life in Primary Care: Which Aspects Matter in Multimorbid Patients with Type 2 Diabetes Mellitus in a Community Setting?', 12: e0170883.                                         | Outcome: Preferences not addressed                 |
| Kangovi, S., N. Mitra, R. A. Smith, R. Kulkarni, L. Turr, H. Huo, K. Glanz, D. Grande, and J. A. Long. 2017. 'Decision-making and goal-setting in chronic disease management: Baseline findings of a randomized controlled trial', <i>Patient Education &amp; Counseling</i> , 100: 449-55.        | Population: Age <60 yrs.                           |
| Kaplan, A. L., C. M. Crespi, J. D. Saucedo, S. E. Connor, M. S. Litwin, and C. S. Saigal. 2014. 'Decisional conflict in economically disadvantaged men with newly diagnosed prostate cancer: Baseline results from a shared decision-making trial', <i>Cancer</i> , 120: 2721-27.                  | Population: Not multimorbid                        |
| Kaplan, A. L., C. M. Crespi, J. Saucedo, E. Dahan, S. Lambrechts, R. Kaplan, and C. Saigal. 2014. 'Predictors of decisional conflict in men with newly diagnosed prostate cancer: Baseline results from a shared decision-making trial', <i>Journal of Urology</i> , 1): e144-e45.                 | Duplicates                                         |
| Karlawish, J. H., A. Zbrozek, B. Kinosian, A. Gregory, A. Ferguson, and H. A. Glick. 2008. 'Preference-based quality of life in patients with Alzheimer's disease', <i>Alzheimer's and Dementia</i> , 4: 193-202.                                                                                  | Population: Not multimorbid                        |
| Karlsson, V., I. Bergbom, M. Ringdal, and A. Jonsson. 2016. 'After discharge home: a qualitative analysis of older ICU patients' experiences and care needs', <i>Scandinavian Journal of Caring Sciences</i> , 30: 749-56.                                                                         | Population: Not multimorbid                        |
| Karoff, M., W. Muller-Fahrnow, J. Kittel, H. O. Vetter, H. Gulker, and C. Spyra. 2002. '[Outpatient cardiological rehabilitation--acceptance and conditions related to choice of setting]', <i>Rehabilitation</i> , 41: 167-74.                                                                    | Population: Not multimorbid                        |

|                                                                                                                                                                                                                                                                                                                                           |                                                    |
|-------------------------------------------------------------------------------------------------------------------------------------------------------------------------------------------------------------------------------------------------------------------------------------------------------------------------------------------|----------------------------------------------------|
| Kates, Jeannette M. 2015. 'Treatment-related decisional conflict, quality of life, and comorbid illness in older adults with cancer', 75.                                                                                                                                                                                                 | Outcome: Preferences not addressed                 |
| Kaur, M., E. Ashbeck, D. Ran, C. K. Kwoh, and E. Vina. 2016. 'Knee pain and patient preference for knee replacement: Healthcare access matters', <i>Arthritis and Rheumatology</i> , 68 (Supplement 10): 1589-90.                                                                                                                         | Population: Not multimorbid                        |
| Keizer, J., I. Jzerman M.J, J. A. Van Til, and A. M. Wymenga. 2016. 'An a priori decision criteria elicitation method for treatment decision-making in elderly colorectal cancer patients', <i>Value in Health</i> , 19 (7): A392.                                                                                                        | Outcome: Preferences from physicians or caregivers |
| Kelly, K. N., K. Noyes, J. Dolan, F. Fleming, J. R. Monson, M. Gonzalez, N. Sevdalis, and A. Dozier. 2016. 'Patient perspective on care transitions after colorectal surgery', <i>Journal of Surgical Research</i> , 203: 103-12.                                                                                                         | Population: Age <60 yrs.                           |
| Khan, I. H., A. M. Garratt, A. Kumar, D. J. Cody, G. R. D. Catto, N. Edward, and A. M. MacLeod. 1995. 'Patients' perception of health on renal replacement therapy: Evaluation using a new instrument', <i>Nephrology Dialysis Transplantation</i> , 10: 684-89.                                                                          | Outcome: Preferences not addressed                 |
| Khokhar, O. S., and J. H. Lewis. 2007. 'Reasons why patients infected with chronic hepatitis C virus choose to defer treatment: Do they alter their decision with time?', <i>Digestive Diseases and Sciences</i> , 52: 1168-76.                                                                                                           | Population: Age <60 yrs.                           |
| Kim, C., F. C. Wright, N. J. Look Hong, G. Groot, L. Helyer, P. Meiers, M. L. Quan, R. Urquhart, R. Warburton, and A. R. Gagliardi. 2018. 'Patient and provider experiences with active surveillance: A scoping review', <i>PLoS ONE</i> , 13 (2) (no pagination).                                                                        | Population: Not multimorbid                        |
| Kim, D. H., and M. W. Rich. 2016. 'Patient-Centred Care of Older Adults With Cardiovascular Disease and Multiple Chronic Conditions', <i>Canadian Journal of Cardiology</i> , 32: 1097-107.                                                                                                                                               | Document type: Editorials & reviews                |
| Kim, J., S. Kim, S. W. Hong, S. W. Kang, and M. An. 2017. 'Validation of the Decisional Conflict Scale for Evaluating Advance Care Decision Conflict in Community-dwelling Older Adults', <i>Asian Nursing Research</i> , 11: 297-303.                                                                                                    | Population: Not multimorbid                        |
| Kimmel, A. L., J. C. Wang, R. K. Scott, L. Briggs, and M. E. Lyon. 2015. 'Family CEntered (FACE) advance care planning: Study design and methods for a patient-centered communication and decision-making intervention for patients with HIV/AIDS and their surrogate decision-makers', <i>Contemporary Clinical Trials</i> , 43: 172-78. | Population: Age <60 yrs.                           |
| King Jr, J. T., M. A. Styn, J. Tsevat, and M. S. Roberts. 2003. "'Perfect health" versus "disease free": The impact of anchor point choice on the measurement of preferences and the calculation of disease-specific disutilities', <i>Medical Decision Making</i> , 23: 212-25.                                                          | Outcome: Preferences not addressed                 |
| Kjoenniksen, I., M. Lindbaek, and A. G. Granas. 2006. 'Patients' attitudes towards and experiences of generic drug substitution in Norway', <i>Pharmacy World and Science</i> , 28: 284-89.                                                                                                                                               | Outcome: Preferences not addressed                 |
| Knight, S. J., D. P. Nathan, A. K. Siston, M. W. Kattan, A. S. Elstein, K. M. Collela, M. S. Wolf, N. S. Slimack, C. L. Bennett, and R. M. Golub. 2002. 'Pilot study of a utilities-based treatment decision intervention for prostate cancer patients', <i>Clinical Prostate Cancer</i> , 1: 105-14.                                     | Outcome: Preferences not addressed                 |

|                                                                                                                                                                                                                                                                                                                                                                   |                                       |
|-------------------------------------------------------------------------------------------------------------------------------------------------------------------------------------------------------------------------------------------------------------------------------------------------------------------------------------------------------------------|---------------------------------------|
| Ko, Eunjeong, and Jaehoon Lee. 2014. 'End-of-life treatment preference among low-income older adults: A race/ethnicity comparison study', <i>Journal of Health Care for the Poor and Underserved</i> , 25: 1021-33.                                                                                                                                               | Population: Not multimorbid           |
| Ko, J., E. Fox, P. Wicks, P. DasMahapatra, K. Kendall, W. Hong, E. Burton, K. Hawker, I. Kosoy, D. Liakhovitski, J. Park, and V. Herrera. 2016. 'Treatment preference in relapsing-remitting multiple sclerosis: An online choice study in patients and neurologists', <i>Neurology</i> . Conference: 68th American Academy of Neurology Annual Meeting, AAN, 86. | Population: Not multimorbid           |
| Ko, J., H. F. Kennecke, H. J. Lim, S. Gill, R. Woods, C. Speers, and W. Y. Cheung. 2012. 'Reasons for and outcomes of adjuvant chemotherapy choices in elderly patients with resected stage III colon cancer', <i>Journal of Clinical Oncology</i> . Conference, 30.                                                                                              | Outcome: Preferences not addressed    |
| Konig, H. H., S. Bernert, and M. C. Angermeyer. 2005. '[Measuring preferences for depressive health states]', <i>Psychiatrische Praxis</i> , 32: 122-31.                                                                                                                                                                                                          | Population: Age <60 yrs.              |
| Kromer, C., M. L. Schaarschmidt, A. Schmieder, R. Herr, S. Goerd, and W. K. Peitsch. 2014. 'Patient preferences for treatment of psoriasis with biologics: A discrete choice experiment', <i>British Journal of Dermatology</i> , 171 (6): e125.                                                                                                                  | Population: Age <60 yrs.              |
| Kruschinski, C., A. Klaassen, A. Breull, A. Broll, and E. Hummers-Pradier. 2010. 'Priorities of elderly dizzy patients in general practice. Findings and psychometric properties of the "Dizziness Needs Assessment" (DiNA)', <i>Zeitschrift fur Gerontologie und Geriatrie</i> , 43: 317-23.                                                                     | Population: Not multimorbid           |
| Kubacka, R. T., and R. P. Juhl. 1985. 'Attitudes of patients with hypertension or arthritis toward the frequency of medication administration', <i>Am J Hosp Pharm</i> , 42: 2499-501.                                                                                                                                                                            | Population: Not multimorbid           |
| Laakkonen, M. L., K. H. Pitkala, T. E. Strandberg, S. Berglind, and R. S. Tilvis. 2005. 'Older people's reasoning for resuscitation preferences and their role in the decision-making process', <i>Resuscitation</i> , 65: 165-71.                                                                                                                                | Population: Not multimorbid           |
| Laba, T. L., J. A. Brien, and S. Jan. 2012. 'Understanding rational non-adherence to medications. A discrete choice experiment in a community sample in Australia', <i>BMC Family Practice</i> , 13: 61.                                                                                                                                                          | Population: Age <60 yrs.              |
| LaDonna, K. A., J. Bates, G. R. Tait, A. McDougall, V. Schulz, and L. Lingard. 2017. '"Who is on your health-care team?" Asking individuals with heart failure about care team membership and roles', <i>Health expectations : an international journal of public participation in health care and health policy</i> , 20: 198-210.                               | Outcome: Preferences not addressed    |
| Lærum, Even, Siri Steine, Arnstein Finset, and Sverre Lundevall. 1998. 'Complex health problems in general practice: Do we need an instrument for consultation improvement and patient involvement? Theoretical foundation, development and user evaluation of the Patient Perspective Survey (PPS)', <i>Family Practice</i> , 15: 172-81.                        | Outcome: Preferences not addressed    |
| Laiteerapong, N., E. S. Huang, M. H. Chin, and N. Y. Acad Sci Annals. 2011. 'Prioritization of care in adults with diabetes and comorbidity', 1243: 69-87.                                                                                                                                                                                                        | Outcome: Preferences not addressed    |
| Lane, H., S. A. McLachlan, and J. Philip. 2014. 'Decision making factors in consultations between older people and their oncologists', <i>Asia-Pacific Journal of Clinical Oncology</i> , 9): 128-29.                                                                                                                                                             | Document type: Conference proceedings |

|                                                                                                                                                                                                                                                                                                                                                                                            |                                    |
|--------------------------------------------------------------------------------------------------------------------------------------------------------------------------------------------------------------------------------------------------------------------------------------------------------------------------------------------------------------------------------------------|------------------------------------|
| Lang, V., S. Walter, J. Fessler, M. J. Koester, D. Ruetters, and J. Huebner. 2017. 'The role of the general practitioner in cancer care: a survey of the patients' perspective', <i>Journal of Cancer Research and Clinical Oncology</i> , 143: 895-904.                                                                                                                                   | Population: Not multimorbid        |
| Lannin, N. 2003. 'Goal attainment scaling allows program evaluation of a home-based occupational therapy program', <i>Occupational Therapy in Health Care</i> , 17: 43-54.                                                                                                                                                                                                                 | Population: Age <60 yrs.           |
| Larson, C. O., E. C. Nelson, D. Gustafson, and P. B. Batalden. 1996. 'The relationship between meeting patients' information needs and their satisfaction with hospital care and general health status outcomes', <i>International journal for quality in health care: journal of the International Society for Quality in Health Care / ISQua</i> , 8: 447-56.                            | Population: Not multimorbid        |
| Laudet, Alexandre B., and William White. 2010. 'What are your priorities right now? Identifying service needs across recovery stages to inform service development', <i>Journal of Substance Abuse Treatment</i> , 38: 51-59.                                                                                                                                                              | Population: Age <60 yrs.           |
| Lavelle, K., A. M. Sowerbutts, N. Bundred, M. Pilling, L. Degner, C. Stockton, and C. Todd. 2014. 'Is lack of surgery for older breast cancer patients in the UK explained by patient choice or poor health? A prospective cohort study', <i>British Journal of Cancer</i> , 110: 573-83.                                                                                                  | Population: Not multimorbid        |
| Lechner, S., W. Herzog, F. Boehlen, I. Maatouk, K. U. Saum, H. Brenner, and B. Wild. 2016. 'Control preferences in treatment decisions among older adults - Results of a large population-based study', <i>Journal of Psychosomatic Research</i> , 86: 28-33.                                                                                                                              | Population: Not multimorbid        |
| Lederer, S., M. J. Fischer, H. S. Gordon, A. Wadhwa, S. Popli, and E. J. Gordon. 2016. 'A question prompt sheet for adult patients with chronic kidney disease', <i>BMC Nephrology</i> , 17 (1) (no pagination).                                                                                                                                                                           | Outcome: Preferences not addressed |
| Lee, P. Y., E. M. Khoo, W. Y. Low, Y. K. Lee, K. L. Abdullah, S. A. Azmi, and C. J. Ng. 2016. 'Mismatch between health-care professionals' and patients' views on a diabetes patient decision aid: a qualitative study', <i>Health expectations: an international journal of public participation in health care and health policy</i> , 19: 427-36.                                       | Population: Age <60 yrs.           |
| Lee, Y. K., C. J. Ng, and W. Y. Low. 2017. 'Addressing unmet needs of patients with chronic diseases: Impact of the VISIT website during consultations', <i>Journal of Evaluation in Clinical Practice</i> , 23: 1281-88.                                                                                                                                                                  | Outcome: Preferences not addressed |
| Legros, B., P. Boon, B. Ceulemans, T. Coppens, K. Geens, H. Hauman, L. Lagae, A. Meurs, L. Mol, M. Ossemann, K. van Rijckevorsel, M. Van Zandijcke, P. Vrielynck, D. Wagemans, and T. Grisar. 2012. 'Development of an electronic decision tool to support appropriate treatment choice in adult patients with epilepsy--Epi-Scope()', <i>Seizure</i> , 21: 32-9.                          | Outcome: Preferences not addressed |
| Lenferink, A., P. Frith, P. van der Valk, J. Buckman, R. Sladek, P. Cafarella, J. van der Palen, and T. Effing. 2013. 'A self-management approach using self-initiated action plans for symptoms with ongoing nurse support in patients with Chronic Obstructive Pulmonary Disease (COPD) and comorbidities: the COPE-III study protocol', <i>Contemporary Clinical Trials</i> , 36: 81-9. | Outcome: Preferences not addressed |
| Leonardsen, A. L., and L. P. Jelsness-Jorgensen. 2017. 'Patient experiences and predictors in an acute geriatric ward: A cross-sectional study', <i>Journal of Clinical Nursing</i> , 26: 4567-73.                                                                                                                                                                                         | Outcome: Preferences not addressed |

|                                                                                                                                                                                                                                                                                                                                                                                                                |                                       |
|----------------------------------------------------------------------------------------------------------------------------------------------------------------------------------------------------------------------------------------------------------------------------------------------------------------------------------------------------------------------------------------------------------------|---------------------------------------|
| Lewis, C. L., C. E. Kistler, H. R. Amick, L. C. Watson, D. L. Bynum, L. C. Walter, and M. P. Pignone. 2006. 'Older adults' attitudes about continuing cancer screening later in life: a pilot study interviewing residents of two continuing care communities', <i>BMC Geriatrics</i> , 6: 10.                                                                                                                 | Population: Not multimorbid           |
| Lewis, C. L., C. P. DeLeon, M. P. Pignone, and C. E. Golin. 2011. 'Decision support and individualized decision making for colorectal cancer screening in the elderly', <i>Journal of General Internal Medicine</i> , 1): S120-S21.                                                                                                                                                                            | Document type: Conference proceedings |
| Lewis, C. L., T. Fried, J. S. Ross, J. Aminawung, L. Werner, C. Kistler, M. Tinetti, K. McKenzie, I. Genao, and C. Gross. 2012. 'Understanding and decision making about screening colonoscopy for older persons with multimorbidity', <i>Journal of General Internal Medicine</i> , 2): S341.                                                                                                                 | Document type: Conference proceedings |
| Lewis, C., C. P. DeLeon, M. P. Pignone, and C. Golin. 2011. 'Patient and physician discussions after decision support for colorectal cancer screening in the elderly', <i>Journal of General Internal Medicine</i> , 1): S118.                                                                                                                                                                                 | Duplicates                            |
| Lewis, E. F., P. A. Johnson, W. Johnson, C. Collins, L. Griffin, and L. W. Stevenson. 2001. 'Preferences for quality of life or survival expressed by patients with heart failure', <i>Journal of Heart and Lung Transplantation</i> , 20: 1016-24.                                                                                                                                                            | Population: Age <60 yrs.              |
| Liska, J., and A. Beal. 2017. 'One Patient Is Not One Condition: Delivering Patient-Centered Care to Those With Multiple Chronic Conditions', <i>Therapeutic Innovation and Regulatory Science</i> , 51: 468-70.                                                                                                                                                                                               | Document type: Editorials & reviews   |
| Liu, L. N., C. H. Chen, T. W. Liu, Y. C. Lin, S. C. K. Lee, and S. T. Tang. 2015. 'Preferences for aggressive end-of-life care and their determinants among Taiwanese terminally ill cancer patients', <i>Cancer Nursing</i> , 38: E9-E18.                                                                                                                                                                     | Document type: Conference proceedings |
| Lo, C., D. Ilic, H. Teede, A. Cass, G. Fulcher, M. Gallagher, G. Johnson, P. G. Kerr, T. Mathew, K. Murphy, K. Polkinghorne, R. Walker, and S. Zoungas. 2016. 'The perspectives of patients on health-care for co-morbid diabetes and chronic kidney disease: A qualitative study', <i>PLoS ONE</i> , 11 (1) (no pagination).                                                                                  | Outcome: Preferences not addressed    |
| Lo, C., Y. Tran, K. Anderson, A. Craig, and J. Middleton. 2016. 'Functional Priorities in Persons with Spinal Cord Injury: Using Discrete Choice Experiments To Determine Preferences', <i>Journal of Neurotrauma</i> , 33: 1958-68.                                                                                                                                                                           | Population: Age <60 yrs.              |
| Loffler, C., A. Altiner, W. Streich, C. O. Stolzenbach, A. Fuchs, E. Drewelow, A. Hornung, G. Feldmeier, H. van den Bussche, and H. Kaduszkiewicz. 2015. '[Approaches of general practitioners and patients to multimorbidity. Qualitative study]', <i>Zeitschrift fur Gerontologie und Geriatrie</i> , 48: 452-6.                                                                                             | Outcome: Preferences not addressed    |
| Loffler, C., E. Drewelow, S. D. Paschka, M. Frankenstein, J. Eger, L. Jatsch, E. C. Reisinger, J. F. Hallauer, B. Drewelow, K. Heidorn, H. Schroder, A. Wollny, G. Kundt, C. Schmidt, and A. Altiner. 2014. 'Optimizing polypharmacy among elderly hospital patients with chronic diseases--study protocol of the cluster randomized controlled POLITE-RCT trial', <i>Implementation science: IS</i> , 9: 151. | Outcome: Preferences not addressed    |
| Loffler, C., H. Kaduszkiewicz, C. O. Stolzenbach, W. Streich, A. Fuchs, H. van den Bussche, F. Stolper, and A. Altiner. 2012. 'Coping with multimorbidity in old age--a qualitative study', <i>BMC Fam Pract</i> , 13: 45.                                                                                                                                                                                     | Outcome: Preferences not addressed    |
| Lum, H. D., and R. L. Sudore. 2016. 'Advance Care Planning and Goals of Care Communication in Older Adults with Cardiovascular Disease and Multi-Morbidity', <i>Clinics in Geriatric Medicine</i> , 32: 247-60.                                                                                                                                                                                                | Document type: Editorials & reviews   |

|                                                                                                                                                                                                                                                                                                                                                                                                                                           |                                       |
|-------------------------------------------------------------------------------------------------------------------------------------------------------------------------------------------------------------------------------------------------------------------------------------------------------------------------------------------------------------------------------------------------------------------------------------------|---------------------------------------|
| Lupari, M., V. Coates, G. Adamson, and G. E. Crealey. 2011. 'We're just not getting it right'--how should we provide care to the older person with multi-morbid chronic conditions?', <i>Journal of Clinical Nursing</i> , 20: 1225-35.                                                                                                                                                                                                   | Outcome: Preferences not addressed    |
| MacInnes, J. 2014. 'An exploration of illness representations and treatment beliefs in heart failure', <i>J Clin Nurs</i> , 23: 1249-56.                                                                                                                                                                                                                                                                                                  | Outcome: Preferences not addressed    |
| MacKinnon, H. J., A. L. Clarke, H. L. Young, K. L. Hull, J. O. Burton, and A. C. Smith. 2015. 'Creating a SPARK: Investigating exercise behaviour and preferences in patients with chronic kidney disease to aid the design of exercise programmes', <i>International Journal of Therapy &amp; Rehabilitation</i> , 22: 52-52.                                                                                                            | Document type: Conference proceedings |
| Madden, M., G. Furze, and R. J. Lewin. 2011. 'Complexities of patient choice in cardiac rehabilitation: Qualitative findings', <i>Journal of Advanced Nursing</i> , 67: 540-49.                                                                                                                                                                                                                                                           | Population: Not multimorbid           |
| Maeng, D. D., G. R. Martsof, D. P. Scanlon, and J. B. Christianson. 2012. 'Care coordination for the chronically ill: understanding the patient's perspective', <i>Health Services Research</i> , 47: 1960-79.                                                                                                                                                                                                                            | Population: Age <60 yrs.              |
| Mahler, C., Sjang, K. Hermann, W. E. Haefell, and J. Szecsenyl. 2009. 'Information on medications - How do chronically ill patients assess counselling on drugs In general practice?. [German]', <i>Deutsche Medizinische Wochenschrift</i> , 134: 1620-24.                                                                                                                                                                               | Outcome: Preferences not addressed    |
| Mahmood, S., M. Van Oosterhout, S. De Jong, R. Landewe, P. Van Riel, and L. H. D. Van Tuyl. 2017. 'Evaluating quality of care in rheumatoid arthritis: The patient perspective', <i>RMD Open</i> , 3 (1) (no pagination).                                                                                                                                                                                                                 | Population: Age <60 yrs.              |
| Mahomed, R., W. St John, and E. Patterson. 2012. 'Understanding the process of patient satisfaction with nurse-led chronic disease management in general practice', <i>Journal of Advanced Nursing</i> , 68: 2538-49.                                                                                                                                                                                                                     | Outcome: Preferences not addressed    |
| Maly, R. C., B. Leake, and R. A. Silliman. 2003. 'Health care disparities in older patients with breast carcinoma: Informational support from physicians', <i>Cancer</i> , 97: 1517-27.                                                                                                                                                                                                                                                   | Population: Not multimorbid           |
| Mandelblatt, J. S., V. B. Sheppard, A. Hurria, G. Kimmick, C. Isaacs, K. L. Taylor, A. B. Kornblith, A. M. Noone, G. Luta, M. Tallarico, W. T. Barry, L. Hunegs, R. Zon, M. Naughton, E. Winer, C. Hudis, S. B. Edge, H. J. Cohen, and H. Muss. 2010. 'Breast cancer adjuvant chemotherapy decisions in older women: The role of patient preference and interactions with physicians', <i>Journal of Clinical Oncology</i> , 28: 3146-53. | Population: Not multimorbid           |
| Mandelblatt, J., B. Kreling, M. Figueiredo, and S. Feng. 2006. 'What is the impact of shared decision making on treatment and outcomes for older women with breast cancer?', <i>Journal of Clinical Oncology</i> , 24: 4908-13.                                                                                                                                                                                                           | Outcome: Preferences not addressed    |
| Mandelblatt, J., V. Sheppard, A. Hurria, G. Kimmick, C. Isaacs, K. Taylor, G. Luta, A. Noone, A. Kornblith, and W. Barry. 2009. 'Patient preference as a determinant of breast cancer adjuvant chemotherapy use in older women: CALGB #369901', <i>Journal of Clinical Oncology</i> , 1): 9544.                                                                                                                                           | Document type: Conference proceedings |
| Maneze, D., S. Dennis, H. Y. Chen, J. Taggart, S. Vagholkar, J. Bunker, and S. T. Liaw. 2014. 'Multidisciplinary care: experience of patients with complex needs', <i>Aust J Prim Health</i> , 20: 20-6.                                                                                                                                                                                                                                  | Outcome: Preferences not addressed    |

|                                                                                                                                                                                                                                                                                                                                                                                                                                                                                                                                             |                                     |
|---------------------------------------------------------------------------------------------------------------------------------------------------------------------------------------------------------------------------------------------------------------------------------------------------------------------------------------------------------------------------------------------------------------------------------------------------------------------------------------------------------------------------------------------|-------------------------------------|
| Mangin, D., G. Stephen, V. Bismah, and C. Risdon. 2016. 'Making patient values visible in healthcare: A systematic review of tools to assess patient treatment priorities and preferences in the context of multimorbidity', <i>BMJ Open</i> , 6 (6) (no pagination).                                                                                                                                                                                                                                                                       | Outcome: Preferences not addressed  |
| Manigault, A. W., I. M. Handley, and S. R. Whillock. 2015. 'Assessment of unconscious decision aids applied to complex patient-centered medical decisions', <i>Journal of medical Internet research</i> , 17: e37.                                                                                                                                                                                                                                                                                                                          | Population: Age <60 yrs.            |
| Markowitz, J. C., K. B. Meehan, E. Petkova, Y. Zhao, P. E. Van Meter, Y. Neria, H. Pessin, and Y. Nazia. 2016. 'Treatment preferences of psychotherapy patients with chronic PTSD', <i>Journal of Clinical Psychiatry</i> , 77: 363-70.                                                                                                                                                                                                                                                                                                     | Population: Age <60 yrs.            |
| Marques, I., D. Petty, T. Raynor, and A. Blenkinsopp. 2017. 'Reducing inappropriate polypharmacy through a patient-centred, shared decision-making model of deprescribing', <i>Pharmacoepidemiology and Drug Safety</i> , 26 (Supplement 1): 12-13.                                                                                                                                                                                                                                                                                         | Document type: Editorials & reviews |
| Marschall-Kehrel, D., R. G. Roberts, and L. Brubaker. 2006. 'Patient-reported outcomes in overactive bladder: the influence of perception of condition and expectation for treatment benefit', <i>Urology</i> , 68: 29-37.                                                                                                                                                                                                                                                                                                                  | Outcome: Preferences not addressed  |
| Mathar, Helle, Pernille Fastholm, Peter Lange, and Niels Sandholm Larsen. 2017. 'Why do patients decline participation in offered pulmonary rehabilitation? A qualitative study', <i>Clinical Rehabilitation</i> , 31: 1674-83.                                                                                                                                                                                                                                                                                                             | Outcome: Preferences not addressed  |
| Mayo, N. M., M. Wallhagen, J. Johnson, and B. Miller. 2013. 'Health care decision-making among older adults with mild cognitive impairment', <i>Journal of the American Geriatrics Society</i> , 3): S342.                                                                                                                                                                                                                                                                                                                                  | Outcome: Preferences not addressed  |
| McGee, M. A., D. W. Howie, P. Ryan, J. R. Moss, and O. T. Holubowycz. 2002. 'Comparison of patient and doctor responses to a total hip arthroplasty clinical evaluation questionnaire', <i>Journal of Bone &amp; Joint Surgery - American Volume</i> , 84-A: 1745-52.                                                                                                                                                                                                                                                                       | Outcome: Preferences not addressed  |
| McGilton, K. S., S. Vellani, L. Yeung, J. Chishtie, E. Commisso, J. Ploeg, M. K. Andrew, A. P. Ayala, M. Gray, D. Morgan, A. F. Chow, E. Parrott, D. Stephens, L. Hale, M. Keatings, J. Walker, W. P. Wodchis, V. Dube, J. McElhaney, and M. Puts. 2018. 'Identifying and understanding the health and social care needs of older adults with multiple chronic conditions and their caregivers: a scoping review', <i>BMC Geriatr</i> , 18: 231.                                                                                            | Document type: Editorials & reviews |
| McHorney, C., N. J. Zhang, and M. Villigran. 2012. 'Temporal-outcome framing preferences for prescription medication information among adults with chronic disease in the United States', <i>Value in Health</i> , 15 (4): A198.                                                                                                                                                                                                                                                                                                            | Population: Not multimorbid         |
| McKenna, R. J., Sr. 1994. 'Clinical aspects of cancer in the elderly. Treatment decisions, treatment choices, and follow-up', <i>Cancer</i> , 74: 2107-17.                                                                                                                                                                                                                                                                                                                                                                                  | Document type: Editorials & reviews |
| McMullen, C. K., M. M. Safford, H. B. Bosworth, S. Phansalkar, A. Leong, M. B. Fagan, A. Trontell, M. Rumptz, M. L. Vandermeer, Education Centers for, Group Research on Therapeutics Patient-Centered Medication Management Workshop Working, W. B. Brinkman, R. Burkholder, L. Frank, K. Hommel, R. Mathews, M. C. Hornbrook, M. Seid, M. Fordis, B. Lambert, N. McElwee, and J. A. Singh. 2015. 'Patient-centered priorities for improving medication management and adherence', <i>Patient Education &amp; Counseling</i> , 98: 102-10. | Population: Age <60 yrs.            |



|                                                                                                                                                                                                                                                                                                                                                                                                              |                                       |
|--------------------------------------------------------------------------------------------------------------------------------------------------------------------------------------------------------------------------------------------------------------------------------------------------------------------------------------------------------------------------------------------------------------|---------------------------------------|
| Meranius, M. S., and L. M. Hammar. 2016. 'How does the healthcare system affect medication self-management among older adults with multimorbidity?', <i>Scand J Caring Sci</i> , 30: 91-8.                                                                                                                                                                                                                   | Outcome: Preferences not addressed    |
| Merlin, J. S., S. R. Young, M. O. Johnson, M. Saag, W. Demonte, R. Modi, S. Shurbaji, W. A. Anderson, R. Kerns, M. J. Bair, S. Kertesz, S. Davies, and J. M. Turan. 2017. 'Using Patient Perspectives to Inform the Development of a Behavioral Intervention for Chronic Pain in Patients with HIV: A Qualitative Study', <i>Pain medicine (Malden, Mass.)</i> , 18: 879-88.                                 | Population: Age <60 yrs.              |
| Mihaylov, S., C. Stark, E. McColl, N. Steen, A. Vanoli, G. Rubin, R. Curless, R. Barton, and J. Bond. 2008. 'Stepped treatment of older adults on laxatives. The STOOL trial', <i>Health Technology Assessment</i> , 12: iii-139.                                                                                                                                                                            | Population: Not multimorbid           |
| Millman, J., K. Galway, O. Santin, and J. Reid. 2016. 'Cancer and serious mental illness--patient, caregiver and professional perspectives: study protocol', <i>Journal of Advanced Nursing</i> , 72: 217-26.                                                                                                                                                                                                | Document type: Study protocols        |
| Mishuris, R. G., M. Stewart, G. M. Fix, T. Marcello, D. K. McInnes, T. P. Hogan, J. B. Boardman, and S. R. Simon. 2015. 'Barriers to patient portal access among veterans receiving home-based primary care: a qualitative study', <i>Health expectations : an international journal of public participation in health care and health policy</i> , 18: 2296-305.                                            | Outcome: Preferences not addressed    |
| Miskulin, D. C., K. B. Meyer, N. V. Athienites, A. A. Martin, N. Terrin, J. V. Marsh, N. E. Fink, J. Coresh, N. R. Powe, M. J. Klag, and A. S. Levey. 2002. 'Comorbidity and other factors associated with modality selection in incident dialysis patients: the CHOICE Study. Choices for Healthy Outcomes in Caring for End-Stage Renal Disease', <i>American Journal of Kidney Diseases</i> , 39: 324-36. | Outcome: Preferences not addressed    |
| Mittinty, M. M., A. Marshall, and G. Harvey. 2018. 'What integrated care means from an older person's perspective? A scoping review protocol', <i>BMJ Open</i> , 8 (3) (no pagination).                                                                                                                                                                                                                      | Document type: Study protocols        |
| Mockford, C., Z. Fritz, R. George, R. Court, A. Grove, B. Clarke, R. Field, and G. D. Perkins. 2015. 'Do not attempt cardiopulmonary resuscitation (DNACPR) orders: a systematic review of the barriers and facilitators of decision-making and implementation', <i>Resuscitation</i> , 88: 99-113.                                                                                                          | Outcome: Preferences not addressed    |
| Moise, N., S. Ye, C. Alcantara, K. Davidson, and I. Kronish. 2015. 'Depression and preference for shared decision making amongst patients with uncontrolled hypertension', <i>Psychosomatic Medicine</i> , 77 (3): A28.                                                                                                                                                                                      | Document type: Conference proceedings |
| Montague, L., B. A. Boland, and C. Wright. 2012. 'Use of advance directives in an elderly home-bound population', <i>Journal of General Internal Medicine</i> , 2): S342.                                                                                                                                                                                                                                    | Document type: Conference proceedings |
| Mooijaart, S. P., K. Broekhuizen, S. Trompet, A. J. M. de Craen, J. Gussekloo, A. Oleksik, D. van Heemst, G. J. Blauw, and M. Muller. 2015. 'Evidence-based medicine in older patients: How can we do better?', <i>Netherlands Journal of Medicine</i> , 73: 211-18.                                                                                                                                         | Outcome: Preferences not addressed    |
| Moorhouse, P., and L. H. Mallery. 2012. 'Palliative and therapeutic harmonization: A model for appropriate decision-making in frail older adults', <i>Journal of the American Geriatrics Society</i> , 60: 2326-32.                                                                                                                                                                                          | Outcome: Preferences not addressed    |

|                                                                                                                                                                                                                                                                                                                                                                 |                                     |
|-----------------------------------------------------------------------------------------------------------------------------------------------------------------------------------------------------------------------------------------------------------------------------------------------------------------------------------------------------------------|-------------------------------------|
| Moraleda Barba, S., M. I. Ballesta Rodriguez, A. L. Delgado Quero, N. Lietor Villajos, A. Moreno Corredor, and M. Delgado Rodriguez. 2015. '[The adaptation and validation to Spanish of the questionnaire Aid to Capacity Evaluation (ACE), for the assessment of the ability of patients in medical decision-making]', <i>Atencion Primaria</i> , 47: 149-57. | Outcome: Preferences not addressed  |
| Morecroft, C., J. Cantrill, and M. P. Tully. 2006. 'Individual patient's preferences for hypertension management: a Q-methodological approach', <i>Patient Educ Couns</i> , 61: 354-62.                                                                                                                                                                         | Population: Age <60 yrs.            |
| Morgan, J. L., M. Burton, K. Collins, K. J. Lifford, T. G. Robinson, K. L. Cheung, R. Audisio, M. W. Reed, L. Wyld, and Management Bridging Age Gap Trial. 2015. 'The balance of clinician and patient input into treatment decision-making in older women with operable breast cancer', <i>Psycho-Oncology</i> , 24: 1761-66.                                  | Population: Not multimorbid         |
| Morishige, R., H. Nakajima, K. Yoshizawa, J. Mahlich, and R. Sruamsiri. 2017. 'Preferences Regarding Shared Decision-Making in Japanese Inflammatory Bowel Disease Patients', <i>Advances in Therapy</i> , 33: 2242-56.                                                                                                                                         | Population: Age <60 yrs.            |
| Morsch, P., A. R. Mirandola, I. C. Caberlon, and A. J. G. Bos. 2017. 'Factors associated with health-related decision-making in older adults from Southern Brazil', <i>Geriatrics &amp; Gerontology International</i> , 17: 798-803.                                                                                                                            | Population: Not multimorbid         |
| Mortsiefer, A., A. Altiner, A. Ernst, H. Kadusiewicz, A. Krahe, C. Mellert, I. Schafer, C. O. Stolzenbach, B. Wiese, and C. Loffler. 2017. 'Satisfaction with general practice care in German patients with multimorbidity: A cross-sectional study', <i>Family Practice</i> , 34: 452-58.                                                                      | Outcome: Preferences not addressed  |
| Moss, A. H. 2017. 'Integrating Supportive Care Principles Into Dialysis Decision Making: A Primer for Palliative Medicine Providers', <i>Journal of Pain and Symptom Management</i> , 53: 656-+.                                                                                                                                                                | Document type: Editorials & reviews |
| Moultry, A. M., and I. O. Poon. 2008. 'Perceived value of a home-based medication therapy management program for the elderly', <i>The Consultant pharmacist : the journal of the American Society of Consultant Pharmacists</i> , 23: 877-85.                                                                                                                   | Outcome: Preferences not addressed  |
| Muhlbacher, A. C., and M. Nbling. 2010. 'Analysis of patients preferences: Direct assessment and discrete-choice experiment in therapy of adults with attention-deficit hyperactivity disorder', <i>Patient</i> , 3: 285-94.                                                                                                                                    | Population: Age <60 yrs.            |
| Muhlbacher, A. C., S. Bethge, S. D. Reed, and K. A. Schulman. 2016. 'Patient Preferences for Features of Health Care Delivery Systems: A Discrete Choice Experiment', <i>Health Services Research</i> , 51: 704-27.                                                                                                                                             | Population: Age <60 yrs.            |
| Muhlbacher, A. C., U. Junker, C. Juhnke, E. Stemmler, T. Kohlmann, F. Leverkus, and M. Nubling. 2015. 'Chronic pain patients' treatment preferences: a discrete-choice experiment', <i>European Journal of Health Economics</i> , 16: 613-28.                                                                                                                   | Population: Age <60 yrs.            |
| Muralidhar, V., B. S. Rose, Y. W. Chen, M. D. Nezoslosky, and P. L. Nguyen. 2016. 'Association Between Travel Distance and Choice of Treatment for Prostate Cancer: Does Geography Reduce Patient Choice?', <i>International Journal of Radiation Oncology Biology Physics</i> , 96: 313-17.                                                                    | Population: Not multimorbid         |

|                                                                                                                                                                                                                                                                                                                  |                                       |
|------------------------------------------------------------------------------------------------------------------------------------------------------------------------------------------------------------------------------------------------------------------------------------------------------------------|---------------------------------------|
| Murphy, D. J., D. Burrows, S. Santilli, A. W. Kemp, S. Tenner, B. Kreling, and J. Teno. 1994. 'THE INFLUENCE OF THE PROBABILITY OF SURVIVAL ON PATIENTS PREFERENCES REGARDING CARDIOPULMONARY-RESUSCITATION', <i>New England Journal of Medicine</i> , 330: 545-49.                                              | Population: Not multimorbid           |
| Murphy, D. J., G. J. Gahm, S. Santilli, P. North, S. C. N. Oliver, and H. Shapiro. 2002. 'Seniors' preferences for cancer screening and medication use based on absolute risk reduction', <i>Journals of Gerontology Series a-Biological Sciences and Medical Sciences</i> , 57: M100-M05.                       | Population: Not multimorbid           |
| Musila, N., M. Underwood, A. W. McCaskie, N. Black, A. Clarke, and J. H. van der Meulen. 2011. 'Referral recommendations for osteoarthritis of the knee incorporating patients' preferences', <i>Family Practice</i> , 28: 68-74.                                                                                | Outcome: Preferences not addressed    |
| Mutebi, A., T. L. Warholak, L. E. Hines, R. Plummer, and D. C. Malone. 2013. 'Assessing patients' information needs regarding drug-drug interactions', <i>Journal of the American Pharmacists Association</i> , 53: 39-45.                                                                                       | Outcome: Preferences not addressed    |
| Nct, University Yale, A. Hartford Foundation The John, Gordon, Foundation Betty Moore, Foundation Robert Wood Johnson, and Institute Patient-Centered Outcomes Research. 2018. "Patient Priorities Care (PPC)." In.                                                                                              | Ongoing study                         |
| Neumiller, J. J., R. Vandermause, B. J. Gates, P. David, M. Altman, K. R. Tuttle, C. Corbett, D. Sunwold, P. Benson, and G. Burton. 2015. 'Medication - Taking practices and preferences in patients with multiple chronic medical conditions (MCMC)', <i>American Journal of Kidney Diseases</i> , 65 (4): A61. | Document type: Conference proceedings |
| Neuner-Jehle, S. 2016. 'How to avoid polypharmacy in practice and hospital? An overview with practical tools. [German]', <i>Gynakologische Praxis</i> , 41: 337-46.                                                                                                                                              | Document type: Editorials & reviews   |
| Neuner-Jehle, S. 2017. 'Systematic approaches to reduce polypharmacy: An overview with practical tools. [German]', <i>Diabetologe</i> , 13: 85-90.                                                                                                                                                               | Document type: Editorials & reviews   |
| Neuner-Jehle, S., S. Zechmann, D. G. Maissen, T. Rosemann, and O. Senn. 2017. 'Patient-provider concordance in the perception of illness and disease: A cross-sectional study among multimorbid patients and their general practitioners in Switzerland', <i>Patient Preference and Adherence</i> , 11: 1451-58. | Outcome: Preferences not addressed    |
| Nguyen, G. C., A. Tuskey, T. M. Bayless, T. A. LaVeist, and S. R. Brant. 2008. 'Community-based health preferences for proctocolectomy: a race comparison', <i>Digestive Diseases &amp; Sciences</i> , 53: 741-6.                                                                                                | Population: Age <60 yrs.              |
| Nilsdotter, A. K., and F. Isaksson. 2010. 'Patient relevant outcome 7 years after total hip replacement for OA - A prospective study', <i>BMC Musculoskeletal Disorders</i> , 11 (no pagination).                                                                                                                | Outcome: Preferences not addressed    |
| Noel, L. 2010. 'An Ethnic/Racial Comparison of Causal Beliefs and Treatment Preferences for the Symptoms of Depression Among Patients with Diabetes', <i>Diabetes Educator</i> , 36: 816-27.                                                                                                                     | Population: Age <60 yrs.              |
| Noel, P., B. C. Frueh, A. C. Larme, and J. A. Pugh. 2005. 'Cottaborative care needs and preferences of primary care patients with muttimorbidity', <i>Health Expectations</i> , 8: 54-63.                                                                                                                        | Duplicates                            |

|                                                                                                                                                                                                                                                                                                                                                           |                                       |
|-----------------------------------------------------------------------------------------------------------------------------------------------------------------------------------------------------------------------------------------------------------------------------------------------------------------------------------------------------------|---------------------------------------|
| Nolte, C. H., A. Rakow, B. Landes-Fritzsche, H. Audebert, and P. U. Heuschmann. 2011. 'Improving stroke patients' satisfaction with their education about their disease', <i>Cerebrovascular Diseases</i> , 2): 76.                                                                                                                                       | Outcome: Preferences not addressed    |
| Norberg, E. B., K. Boman, B. Lofgren, and M. Brannstrom. 2014. 'Occupational performance and strategies for managing daily life among the elderly with heart failure', <i>Scand J Occup Ther</i> , 21: 392-9.                                                                                                                                             | Outcome: Preferences not addressed    |
| Norman, J., E. Phillips, and P. Mehta. 2013. 'Clinician and patient perspective in treatment decisions in MDS', <i>Leukemia Research</i> , 1): S96-S97.                                                                                                                                                                                                   | Outcome: Preferences not addressed    |
| Noroxe, K. B., G. Moth, H. T. Maindal, and P. Vedsted. 2013. 'Could the patient have been seen by a nurse; a questionnaire based survey of GP and patient views in Danish general practice', <i>BMC Fam Pract</i> , 14: 171.                                                                                                                              | Population: Not multimorbid           |
| O'Hare, A. M., M. K. Song, M. Kurella Tamura, and A. H. Moss. 2017. 'Research priorities for palliative care for older adults with advanced chronic kidney disease', <i>Journal of Palliative Medicine</i> , 20: 453-60.                                                                                                                                  | Document type: Editorials & reviews   |
| Older patients with multiple chronic conditions desire personalized care plans from their providers. <i>AHRQ Research Activities</i> 2009;(344):16-16                                                                                                                                                                                                     | No full-text available                |
| Olsson, K., U. Naslund, J. Nilsson, and A. Hornsten. 2016. 'Patients' Decision Making About Undergoing Transcatheter Aortic Valve Implantation for Severe Aortic Stenosis', <i>The Journal of cardiovascular nursing</i> , 31: 523-28.                                                                                                                    | Population: Not multimorbid           |
| Olveira, G., M. A. Martinez-Olmos, B. F. De Bobadilla, M. Ferrer, N. Virgili, B. Vega, M. Blanco, M. Layola, L. Lizan, and I. Gozalbo. 2018. 'Patients' and professionals' preferences in terms of the attributes of home enteral nutrition products in Spain. A discrete choice experiment', <i>European Journal of Clinical Nutrition</i> , 72: 272-80. | Population: Not multimorbid           |
| Olveira, G., M. A. Martinez-Olmos, B. Fernandez De Bobadilla, M. Ferrer, N. Virgili, B. Vega, M. Blanco, M. Layola, L. Lizan, and M. Tribaldos De Suarez. 2016. 'Preferences for the characteristics of home enteral nutrition (HEN) via tube feeding: A discrete-choice experiment', <i>Value in Health</i> , 19 (7): A472.                              | Document type: Conference proceedings |
| O'Malley, P. G., J. Hanson, D. Becher, and J. L. Jackson. 2012. 'Patient and physician concordance on perceived degree of shared decision making of the same medical encounter', <i>Journal of General Internal Medicine</i> , 2): S264.                                                                                                                  | Document type: Conference proceedings |
| O'Neal, Erica L., Jared R. Adams, Gregory J. McHugo, Aricca D. Van Citters, Robert E. Drake, and Stephen J. Bartels. 2008. 'Preferences of older and younger adults with serious mental illness for involvement in decision-making in medical and psychiatric settings', <i>American Journal of Geriatric Psychiatry</i> , 16: 826-33.                    | Population: Age <60 yrs.              |
| O'Neill, T., C. Jinks, and B. N. Ong. 2007. 'Decision-making regarding total knee replacement surgery: a qualitative meta-synthesis', <i>BMC Health Services Research</i> , 7: 52.                                                                                                                                                                        | Outcome: Preferences not addressed    |
| Ortiz, D. V., R. O. Martinez, and D. V. Espino. 2015. 'Framing Effects on End-of-Life Preferences Among Latino Elders', <i>Social Work in Health Care</i> , 54: 708-24.                                                                                                                                                                                   | Population: Not multimorbid           |

|                                                                                                                                                                                                                                                                                                                                      |                                       |
|--------------------------------------------------------------------------------------------------------------------------------------------------------------------------------------------------------------------------------------------------------------------------------------------------------------------------------------|---------------------------------------|
| Osse, B. H., M. J. Vernooij, E. Schade, and R. P. Grol. 2004. 'Towards a new clinical tool for needs assessment in the palliative care of cancer patients: the PNPC instrument', <i>Journal of Pain &amp; Symptom Management</i> , 28: 329-41.                                                                                       | Population: Age <60 yrs.              |
| Ouanes, I., N. Stambouli, F. Dachraoui, L. Ouanes-Besbes, S. Toumi, F. B. Salem, M. Gahbiche, and F. Abroug. 2012. 'Pattern of end-of-life decisions in two Tunisian intensive care units: The role of culture and intensivists' training', <i>Intensive Care Medicine</i> , 38: 710-17.                                             | Population: Not multimorbid           |
| Ozdemir, S., C. Malhotra, T. Jafar, L. Choong, and E. Finkelstein. 2016. 'Preferences for treatment of end-stage renal disease among elderly patients and caregivers in a multi-ethnic population in Singapore', <i>Journal of Pain and Symptom Management</i> , 52 (6): e110-e111.                                                  | Document type: Conference proceedings |
| Panocchia, N., M. Bossola, and L. Tazza. 2014. 'Decision-making in the implementation or withdrawal of dialysis in the old complex patient', <i>Italian Journal of Medicine</i> , 8: 6-10.                                                                                                                                           | Document type: Editorials & reviews   |
| Paskins, Z., T. Sanders, P. R. Croft, and A. B. Hassell. 2015. 'The Identity Crisis of Osteoarthritis in General Practice: A Qualitative Study Using Video-Stimulated Recall', <i>Annals of Family Medicine</i> , 13: 537-44.                                                                                                        | Outcome: Preferences not addressed    |
| Patel, M. J., M. S. Khan, F. Ali, Z. Kazmi, T. Riaz, S. Awan, and A. L. Sorathia. 2013. 'Patients' Insight of Interpreting Prescriptions and Drug Labels - A Cross Sectional Study', <i>PLoS ONE</i> , 8 (6) (no pagination).                                                                                                        | Outcome: Preferences not addressed    |
| Patel, M., R. Ferris, and C. S. Blaum. 2017. 'Building an evidence base for patient goals directed aligned care: An analysis of the health and retirement study', <i>Journal of the American Geriatrics Society</i> , 65 (Supplement 1): S139.                                                                                       | Document type: Conference proceedings |
| Paterson, B., S. Thorne, and C. Russell. 2002. 'Disease-specific influences on meaning and significance in self-care decision-making in chronic illness', <i>The Canadian journal of nursing research = Revue canadienne de recherche en sciences infirmieres</i> , 34: 61-74.                                                       | Population: Not multimorbid           |
| Patton, D., C. Hughes, C. A. Cadogan, J. Francis, G. J. Gormley, N. Kerse, P. Passmore, and C. Ryan. 2015. 'Using the Theoretical Domains Framework (TDF) to explore barriers and facilitators to adherence to prescribed medicines in community-based older adults', <i>International Journal of Pharmacy Practice</i> , 2): 11-12. | Document type: Conference proceedings |
| Paxton, R. J., P. Nayak, W. C. Taylor, S. Chang, K. S. Courneya, L. Schover, K. Hodges, and L. A. Jones. 2014. 'African-American breast cancer survivors' preferences for various types of physical activity interventions: a Sisters Network Inc. web-based survey', <i>Journal of Cancer Survivorship</i> , 8: 31-8.               | Population: Age <60 yrs.              |
| Payne, S., S. Hawker, C. Kerr, D. Seamark, H. Roberts, N. Jarrett, and H. Smith. 2007. 'Experiences of end-of-life care in community hospitals', <i>Health Soc Care Community</i> , 15: 494-501.                                                                                                                                     | Outcome: Preferences not addressed    |
| Peeters, P., W. Van Biesen, N. Veys, W. Lemahieu, B. De Moor, and J. De Meester. 2016. 'External Validation of a risk stratification model to assist shared decision making for patients starting renal replacement therapy', <i>BMC Nephrology</i> , 17 (1) (no pagination).                                                        | Outcome: Preferences not addressed    |

|                                                                                                                                                                                                                                                                                                                                                                                                                                                                                             |                                    |
|---------------------------------------------------------------------------------------------------------------------------------------------------------------------------------------------------------------------------------------------------------------------------------------------------------------------------------------------------------------------------------------------------------------------------------------------------------------------------------------------|------------------------------------|
| Petersen, J. J., M. A. Paulitsch, K. Mergenthal, J. Gensichen, H. Hansen, S. Weyerer, S. G. Riedel-Heller, A. Fuchs, W. Maier, H. Bickel, H. H. König, B. Wiese, H. van den Bussche, M. Scherer, A. Dahlhaus, and Grp MultiCare Study. 2014. 'Implementation of chronic illness care in German primary care practices - how do multimorbid older patients view routine care? A cross-sectional study using multilevel hierarchical modeling', <i>BMC Health Services Research</i> , 14: 10. | Outcome: Preferences not addressed |
| Piamjariyakul, U., C. E. Smith, M. Werkowitch, and A. Elyachar. 2012. 'Part I: heart failure home management: patients, multidisciplinary health care professionals and family caregivers' perspectives', <i>Appl Nurs Res</i> , 25: 239-45.                                                                                                                                                                                                                                                | Population: Age <60 yrs.           |
| Piccoli, G. B., M. Nazha, I. Capizzi, F. N. Vigotti, S. Scognamiglio, V. Consiglio, E. Mongilardi, M. Bilocati, P. Avagnina, and E. Versino. 2016. 'Diet as a system: an observational study investigating a multi-choice system of moderately restricted low-protein diets', <i>BMC Nephrology</i> , 17: 1-11.                                                                                                                                                                             | Outcome: Preferences not addressed |
| Pieters, H. C., M. V. Heilemann, M. Grant, and R. C. Maly. 2011. 'Older women's reflections on accessing care across their breast cancer trajectory: navigating beyond the triple barriers', <i>Oncology Nursing Forum</i> , 38: 175-84.                                                                                                                                                                                                                                                    | Population: Not multimorbid        |
| Pileckyte, R., T. Zvirblis, V. Ivanauskaite, I. Klimiene, and L. Griskevicius. 2013. 'Chronic lymphocytic leukemia (CLL): Epidemiology, comorbidities and treatment preference in daily clinical practice', <i>Haematologica</i> , 1): 546.                                                                                                                                                                                                                                                 | Population: Not multimorbid        |
| Plouvier, A. O. A., T. C. O. Hartman, C. E. M. Verhulst, B. R. Bloem, C. van Weel, and A. L. M. Lagro-Janssen. 2017. 'Parkinson's disease: Patient and general practitioner perspectives on the role of primary care', <i>Family Practice</i> , 34: 227-33.                                                                                                                                                                                                                                 | Population: Not multimorbid        |
| Politi, M. C., N. George, T. Li, K. M. Korenblat, K. J. Fowler, C. Ho, A. Liapakis, D. Roth, and J. Yee. 2018. 'Project HELP: a study protocol to pilot test a shared decision-making tool about treatment options for patients with hepatitis C and chronic kidney disease', <i>Pilot &amp; Feasibility Studies</i> , 4: 55.                                                                                                                                                               | Document type: Study protocols     |
| Pollard, A., C. Llewellyn, V. Cooper, M. Sachikonye, N. Perry, E. Nixon, A. Miners, E. Youssef, and C. Sabin. 2018. 'Patients' perspectives on the development of HIV services to accommodate ageing with HIV: a qualitative study', <i>International Journal of STD and AIDS</i> , 29: 483-90.                                                                                                                                                                                             | Population: Age <60 yrs.           |
| Porras, C. J. 2016. 'Proposal of practical "patient based model" for decision making in critical limb ischemia (CLI) patients', <i>Vascular</i> , 24 (1 Supplement 1): 64.                                                                                                                                                                                                                                                                                                                  | Outcome: Preferences not addressed |
| Protheroe, J., T. Fahey, A. A. Montgomery, and T. J. Peters. 2000. 'The impact of patients' preferences on the treatment of atrial fibrillation: Observational study of patient based decision analysis', <i>British Medical Journal</i> , 320: 1380-84.                                                                                                                                                                                                                                    | Population: Not multimorbid        |
| Protheroe, J., T. Fahey, A. A. Montgomery, and T. J. Peters. 2001. 'Effects of patients' preferences on the treatment of atrial fibrillation: Observational study of patient-based decision analysis', <i>Western Journal of Medicine</i> , 174: 311-15.                                                                                                                                                                                                                                    | Duplicates                         |
| Pujahari, A. K. 2016. 'Day care vs overnight stay after laparoscopic cholecystectomy even with co-morbidity and a possible second surgery: A patient's choice', <i>Journal of Clinical and Diagnostic Research</i> , 10: PC25-PC27.                                                                                                                                                                                                                                                         | Population: Age <60 yrs.           |

|                                                                                                                                                                                                                                                                                                                                                                                                                                                                   |                                       |
|-------------------------------------------------------------------------------------------------------------------------------------------------------------------------------------------------------------------------------------------------------------------------------------------------------------------------------------------------------------------------------------------------------------------------------------------------------------------|---------------------------------------|
| Puts, M. T. E., B. Tapscott, M. Fitch, D. Howell, J. Monette, D. Wan-Chow-Wah, M. Krzyzanowska, N. B. Leighl, E. Springall, and S. M. Alibhai. 2015. 'A systematic review of factors influencing older adults' decision to accept or decline cancer treatment', <i>Cancer Treatment Reviews</i> , 41: 197-215.                                                                                                                                                    | Document type: Editorials & reviews   |
| Puts, M. T., B. Tapscott, M. Fitch, D. Howell, J. Monette, D. Wan-Chow-Wah, M. K. Krzyzanowska, N. B. Leighl, E. Springall, and S. M. Alibhai. 2015. 'A systematic review of factors influencing older adults' hypothetical treatment decisions', <i>European Oncology and Haematology</i> , 11: 19-33.                                                                                                                                                           | Document type: Editorials & reviews   |
| Puts, M., S. Novak, D. Howell, M. Fitch, M. Krzyzanowska, N. Leighl, J. Monette, D. Wan-Chow-Wah, E. Springall, and S. M. H. Alibhai. 2013. 'A systematic review of factors influencing older adults' decision to accept or refuse cancer treatment', <i>Supportive Care in Cancer</i> , 1): S202.                                                                                                                                                                | Outcome: Preferences not addressed    |
| Puts, M., S. Sattar, K. McWatters, K. Lee, M. Kulik, M. E. Macdonald, R. W. J. Jang, E. Amir, M. K. Krzyzanowska, N. B. Leighl, M. Fitch, A. M. Joshua, P. R. Warde, A. Tourangeau, and S. M. H. Alibhai. 2016. 'What is the role of comorbidity, frailty, and functional status in the decision-making process for older adults with cancer and their family members, oncologists, and family physician?', <i>Journal of Clinical Oncology. Conference</i> , 34. | Duplicates                            |
| Puts, M., S. Sattar, K. McWatters, K. Lee, M. Kulik, M. E. MacDonald, R. Jang, E. Amir, M. Krzyzanowska, N. Leighl, M. Fitch, A. Joshua, P. Warde, A. Tourangeau, and S. Alibhai. 2016. 'What is the role of comorbidity, frailty and functional status in treatment decision-making for older cancer patients and their family members, oncologists, and family physician?', <i>Supportive Care in Cancer</i> , 24 (1 Supplement 1): S45.                        | Document type: Conference proceedings |
| Quensell, M. L., D. A. Taira, T. B. Seto, K. L. Braun, and T. L. Sentell. 2017. "'I Need my Own Place to get Better": Patient Perspectives on the Role of Housing in Potentially Preventable Hospitalizations', <i>Journal of Health Care for the Poor &amp; Underserved</i> , 28: 784-97.                                                                                                                                                                        | Outcome: Preferences not addressed    |
| Radcliff, T. A., M. J. Cote, D. L. Olson, and D. Liebrecht. 2012. 'Rehabilitation Settings After Joint Replacement: An Application of Multiattribute Preference Elicitation', <i>Evaluation and the Health Professions</i> , 35: 182-98.                                                                                                                                                                                                                          | Population: Not multimorbid           |
| Rahemi, Z., and C. L. Williams. 2016. 'Older Adults of Underrepresented Populations and Their End-of-Life Preferences An Integrative Review', <i>Advances in Nursing Science</i> , 39: E1-E29.                                                                                                                                                                                                                                                                    | Document type: Editorials & reviews   |
| Ralphy-Thibodeau, S., F. Knoefel, K. Benjamin, A. Leclerc, S. Pisterman, J. Sohmer, and C. Scrim. 2006. 'Patient choice: An influencing factor on policy-related research to decrease bedrail use as physical restraint', <i>Worldviews on Evidence-Based Nursing</i> , 3: 31-39.                                                                                                                                                                                 | Outcome: Preferences not addressed    |
| Ramages, M., and G. Cheung. 2018. 'Why do older people refuse resuscitation? A qualitative study examining retirement village residents' resuscitation decisions', <i>Psychogeriatrics</i> , 18: 49-56.                                                                                                                                                                                                                                                           | Population: Not multimorbid           |
| Rao, A., F. Caskey, Y. Ben-Shlomo, and L. Biddle. 2016. 'Understanding patients' perspectives influencing participation within equal study in UK-a qualitative study', <i>Nephrology Dialysis Transplantation</i> , 1): i552.                                                                                                                                                                                                                                     | Outcome: Preferences not addressed    |
| Raven, M. C., C. C. Gillespie, R. DiBennardo, K. Van Busum, and B. Elbel. 2012. 'Vulnerable patients' perceptions of health care quality and quality data', <i>Medical decision making : an international journal of the Society for Medical Decision Making</i> , 32: 311-26.                                                                                                                                                                                    | Population: Age <60 yrs.              |

|                                                                                                                                                                                                                                                                                                                                             |                                       |
|---------------------------------------------------------------------------------------------------------------------------------------------------------------------------------------------------------------------------------------------------------------------------------------------------------------------------------------------|---------------------------------------|
| Reeve, E., L. F. Low, and S. N. Hilmer. 2016. 'Beliefs and attitudes of older adults and carers about deprescribing of medications: a qualitative focus group study', <i>British Journal of General Practice</i> , 66: e552-60.                                                                                                             | Outcome: Preferences not addressed    |
| Reeve, E., S. Shakib, I. Hendrix, M. S. Roberts, and M. D. Wiese. 2014. 'Review of deprescribing processes and development of an evidence-based, patient-centred deprescribing process', <i>British Journal of Clinical Pharmacology</i> , 78: 738-47.                                                                                      | Document type: Editorials & reviews   |
| Richter, D., J. Ernst, C. Lehmann, U. Koch, A. Mehnert, and M. Friedrich. 2015. 'Communication Preferences in Young, Middle-Aged, and Elderly Cancer Patients', <i>Oncology Research and Treatment</i> , 38: 590-5.                                                                                                                         | Population: Not multimorbid           |
| Ridgeway, J. L., J. S. Egginton, K. Tiedje, M. Linzer, D. Boehm, S. Poplau, D. R. de Oliveira, L. Odell, V. M. Montori, and D. T. Eton. 2014. 'Factors that lessen the burden of treatment in complex patients with chronic conditions: A qualitative study', <i>Patient Preference and Adherence</i> , 8: 339-51.                          | Population: Age <60 yrs.              |
| Riegel, B., V. V. Dickson, and M. Topaz. 2013. 'Qualitative analysis of naturalistic decision making in adults with chronic heart failure', <i>Nurs Res</i> , 62: 91-8.                                                                                                                                                                     | Outcome: Preferences not addressed    |
| Riffin, C., P. H. Van Ness, and T. Fried. 2017. 'Patient and caregiver perspectives on managing multiple health conditions', <i>Journal of the American Geriatrics Society</i> , 65 (Supplement 1): S183-S84.                                                                                                                               | Document type: Conference proceedings |
| Romo, Rafael Diaz. 2014. 'Decision Making Among Older Adults with a Limited Prognosis', Ph.D.: 162 p-62 p.                                                                                                                                                                                                                                  | Document type: Conference proceedings |
| Rood, J. A., F. J. van Zuuren, F. Stam, T. van der Ploeg, C. Eeltink, I. M. Verdonck-de Leeuw, and P. C. Huijgens. 2015. 'Perceived need for information among patients with a haematological malignancy: associations with information satisfaction and treatment decision-making preferences', <i>Hematological Oncology</i> , 33: 85-98. | Population: Not multimorbid           |
| Rosstad, T., H. Garasen, A. Steinsbekk, O. Sletvold, and A. Grimsmo. 2013. 'Development of a patient-centred care pathway across healthcare providers: a qualitative study', <i>BMC Health Services Research</i> , 13: 121.                                                                                                                 | Outcome: Preferences not addressed    |
| Roth, K., J. Lynn, Z. Zhong, M. Borum, and N. V. Dawson. 2000. 'Dying with end stage liver disease with cirrhosis: insights from SUPPORT. Study to Understand Prognoses and Preferences for Outcomes and Risks of Treatment', <i>Journal of the American Geriatrics Society</i> , 48: S122-30.                                              | Population: Age <60 yrs.              |
| Roy, A. N., S. S. Madhavan, and A. Lloyd. 2015. 'A Discrete Choice Experiment to Elicit Patient Willingness to Pay for Attributes of Treatment-Induced Symptom Relief in Comorbid. Insomnia', <i>Managed care (Langhorne, Pa.)</i> , 24: 42-48.                                                                                             | Population: Age <60 yrs.              |
| Ruggiano, N., and D. Edvardsson. 2013. 'Person-Centeredness in Home- and Community-Based Long-Term Care: Current Challenges and New Directions', <i>Social Work in Health Care</i> , 52: 846-61.                                                                                                                                            | Document type: Editorials & reviews   |
| Ruland, C. M. 1998. 'Integrating patient preferences for self-care capability in nursing care: effects on nurses' care priorities and patient outcomes', Ph.D.: 255 p-55 p.                                                                                                                                                                 | Document type: Conference proceedings |
| Rutecki, G. W., L. Rodriguez, A. Cugino, D. Jarjoura, F. Hastings, and F. C. Whittier. 1994. 'End of life issues in ESRD: A study of three decision variables that affect patient attitudes', <i>ASAIO Journal</i> , 40: M798-M802.                                                                                                         | Outcome: Preferences not addressed    |



|                                                                                                                                                                                                                                                                                                                                                                                                                                                           |                                    |
|-----------------------------------------------------------------------------------------------------------------------------------------------------------------------------------------------------------------------------------------------------------------------------------------------------------------------------------------------------------------------------------------------------------------------------------------------------------|------------------------------------|
| Ryoo, J. J., D. L. Ordin, A. L. M. Antonio, S. M. Oishi, M. K. Gould, S. M. Asch, and J. L. Malin. 2013. 'Patient preference and contraindications in measuring quality of care: What do administrative data miss?', <i>Journal of Clinical Oncology</i> , 31: 2716-23.                                                                                                                                                                                   | Population: Not multimorbid        |
| Sales, C., R. Tavares, L. Amado, P. Martins, J. Barros, V. Miranda, A. Santos-Silva, P. Mena-Matos, and E. Costa. 2017. 'Being here is a prison: Patient reported quality of life burdens associated to dialysis', <i>Nephrology Dialysis Transplantation</i> , 32 (Supplement 3): iii713.                                                                                                                                                                | Outcome: Preferences not addressed |
| Samalin, L., J. B. Genty, L. Boyer, J. Lopez-Castroman, M. Abbar, and P. M. Llorca. 2018. 'Shared Decision-Making: a Systematic Review Focusing on Mood Disorders', <i>Current Psychiatry Reports</i> , 20: 11.                                                                                                                                                                                                                                           | Population: Age <60 yrs.           |
| Sanchez-Ballester, F., P. Miranda, I. Lizarraga, J. Rejas, and D. Arumi. 2014. 'Therapeutic benefit in patients switching tolterodine to other novel antimuscarinic agents', <i>Actas urologicas espanolas</i> , 38: 156-63.                                                                                                                                                                                                                              | Outcome: Preferences not addressed |
| Sattar, S., S. M. H. Alibhai, M. Fitch, M. Krzyzanowska, N. Leighl, and M. T. E. Puts. 2018. 'Chemotherapy and radiation treatment decision-making experiences of older adults with cancer: A qualitative study', <i>Journal of Geriatric Oncology</i> , 9: 47-52.                                                                                                                                                                                        | Population: Not multimorbid        |
| Saunders, C. H., G. Elwyn, K. Kirkland, and M. A. Durand. 2018. 'Serious Choices: A Protocol for an Environmental Scan of Patient Decision Aids for Seriously Ill People at Risk of Death Facing Choices about Life-Sustaining Treatments', 11: 97-106.                                                                                                                                                                                                   | Outcome: Preferences not addressed |
| Schaarschmidt, M. L., C. Kromer, R. Herr, A. Schmieder, D. Sonntag, S. Goerdts, and W. K. Peitsch. 2015. 'Patient preferences for biologicals in psoriasis: Top priority of safety for cardiovascular patients', <i>PLoS ONE</i> , 10 (12) (no pagination).                                                                                                                                                                                               | Population: Age <60 yrs.           |
| Schaarschmidt, M. L., C. Kromer, R. Herr, A. Schmieder, S. Goerdts, and W. K. Peitsch. 2015. 'Patient preferences for treatment of psoriasis with biologicals: A discrete choice experiment', <i>Experimental Dermatology</i> , 24 (3): E18.                                                                                                                                                                                                              | Population: Age <60 yrs.           |
| Schers, H., S. Webster, H. Van Den Hoogen, A. Avery, R. Grol, and W. Van Den Bosch. 2002. 'Continuity of care in general practice: A survey of patients' views', <i>British Journal of General Practice</i> , 52: 459-62.                                                                                                                                                                                                                                 | Population: Age <60 yrs.           |
| Schmidt, H., S. Boese, K. Lampe, K. Jordan, E. Fiedler, U. Muller-Werdan, and D. Vordermark. 2018. 'Trans sectoral care of geriatric cancer patients - Results of a multicenter study to pilot test a patient-centered interdisciplinary care concept (PIVOG)', <i>Oncology Research and Treatment</i> , 41 (Supplement 1): 81-82.                                                                                                                        | Outcome: Preferences not addressed |
| Schmidt, H., S. Boese, K. Lampe, K. Jordan, E. Fiedler, U. Muller-Werdan, A. Wienke, and D. Vordermark. 2017. 'Trans sectoral care of geriatric cancer patients based on comprehensive geriatric assessment and patient-reported quality of life - Results of a multicenter study to develop and pilot test a patient-centered interdisciplinary care concept for geriatric oncology patients (PIVOG)', <i>Journal of Geriatric Oncology</i> , 8: 262-70. | Outcome: Preferences not addressed |
| Schmieder, A., M. L. Schaarschmidt, N. Umar, D. D. Terris, M. Goebeler, S. Goerdts, and W. K. Peitsch. 2012. 'Comorbidities significantly impact patients' preferences for psoriasis treatments', <i>Journal of the American Academy of Dermatology</i> , 67: 363-72.                                                                                                                                                                                     | Population: Age <60 yrs.           |

|                                                                                                                                                                                                                                                                                                                                                                        |                                       |
|------------------------------------------------------------------------------------------------------------------------------------------------------------------------------------------------------------------------------------------------------------------------------------------------------------------------------------------------------------------------|---------------------------------------|
| Schmocker, R. K., S. E. Holden, X. Vang, G. E. Levenson, L. M. Cherney Stafford, and E. R. Winslow. 2015. 'Association of Patient-Reported Readiness for Discharge and Hospital Consumer Assessment of Health Care Providers and Systems Patient Satisfaction Scores: A Retrospective Analysis', <i>Journal of the American College of Surgeons</i> , 221: 1073-82.e3. | Outcome: Preferences not addressed    |
| Schneider, A., T. Korner, M. Mehning, M. Wensing, G. Elwyn, and J. Szecsenyi. 2006. 'Impact of age, health locus of control and psychological co-morbidity on patients' preferences for shared decision making in general practice', <i>Patient Education and Counseling</i> , 61: 292-98.                                                                             | Population: Age <60 yrs.              |
| Schoenberg, N. E., S. H. Bardach, K. N. Manchikanti, and A. C. Goodenow. 2011. 'Appalachian residents' experiences with and management of multiple morbidity', <i>Qual Health Res</i> , 21: 601-11.                                                                                                                                                                    | Population: Age <60 yrs.              |
| Schoenborn, N., C. Boyd, M. McNabney, A. Ray, and D. Cayea. 2014. 'Current practices and opportunities in a resident clinic caring for older adults with multimorbidity', <i>Journal of the American Geriatrics Society</i> , 1): S4.                                                                                                                                  | Duplicates                            |
| Schonwetter, R. S., R. M. Walker, M. Solomon, A. Indurkha, and B. E. Robinson. 1996. 'Life values, resuscitation preferences, and the applicability of living wills in an older population', <i>Journal of the American Geriatrics Society</i> , 44: 954-58.                                                                                                           | Population: Not multimorbid           |
| Schuling, J., R. Sytema, and A. J. Berendsen. 2013. '[Adjusting medication: elderly patient's preference counts]', <i>Ned Tijdschr Geneesk</i> , 157: A6491.                                                                                                                                                                                                           | Document type: Editorials & reviews   |
| Schuling, J., R. Sytema, and A. J. Berendsen. 2013. '[Adjusting medication: elderly patient's preference counts]', <i>Ned Tijdschr Geneesk</i> , 157: A6491.                                                                                                                                                                                                           | Duplicates                            |
| Seematter-Bagnoud, L., J. Cornuz, and C. Bula. 2003. '[Screening and prevention in the elderly: which interventions should be proposed, to whom, and up to what age?]', <i>Revue medicale de la Suisse romande</i> , 123: 665-9.                                                                                                                                       | Document type: Editorials & reviews   |
| Sehouli, J., E. M. Schooning, and S. Mahner. 2011. 'What do elderly patients prefer? - A prospective multicenter study of preference for oral or intravenous treosulfan in elderly patients with recurrent ovarian cancer', <i>Journal of Oncology Pharmacy Practice</i> , 17 (1): 10.                                                                                 | Population: Not multimorbid           |
| Selten, E. M., J. E. Vriesevink, R. Geenen, W. H. van der Laan, R. G. van der Meulen-Dilling, M. W. Nijhof, H. J. Schers, and C. H. van den Ende. 2016. 'Reasons for Treatment Choices in Knee and Hip Osteoarthritis: A Qualitative Study', <i>Arthritis Care and Research</i> , 68: 1260-67.                                                                         | Population: Age <60 yrs.              |
| Sendur, M. A., K. Silay, S. Aksoy, S. Ozbek, N. Ozdemir, and K. Altundag. 2016. 'Effect of polypharmacy on treatment preferences and outcome in older breast cancer patients', <i>Annals of Oncology. Conference: 41st European Society for Medical Oncology Congress, ESMO</i> , 27.                                                                                  | Outcome: Preferences not addressed    |
| Sethares, K. A., C. Westlake, and J. Viveiros. 2017. 'Low literacy patients may prefer multi-modal patient education', <i>Journal of Cardiac Failure</i> , 23 (8 Supplement 1): S114.                                                                                                                                                                                  | Document type: Conference proceedings |
| Sewitch, M. J., M. Abrahamowicz, P. L. Dobkin, and R. Tamblyn. 2003. 'Measuring differences between patients' and physicians' health perceptions: The Patient-Physician Discordance Scale', <i>Journal of Behavioral Medicine</i> , 26: 245-64.                                                                                                                        | Population: Age <60 yrs.              |

|                                                                                                                                                                                                                                                                                                                                                                                                  |                                     |
|--------------------------------------------------------------------------------------------------------------------------------------------------------------------------------------------------------------------------------------------------------------------------------------------------------------------------------------------------------------------------------------------------|-------------------------------------|
| Seymour, J. 2007. 'Needs and preferences of patients with diseases other than cancer: The UK experience', <i>Progress in Palliative Care</i> , 15: 108-12.                                                                                                                                                                                                                                       | Document type: Editorials & reviews |
| Shadmi, E., C. M. Boyd, C. J. Hsiao, M. Sylvia, A. B. Schuster, and C. Boulton. 2006. 'Morbidity and older persons' perceptions of the quality of their primary care', <i>Journal of the American Geriatrics Society</i> , 54: 330-34.                                                                                                                                                           | Outcome: Preferences not addressed  |
| Sherbourne, C. D., R. Sturm, and K. B. Wells. 1999. 'What outcomes matter to patients?', <i>J Gen Intern Med</i> , 14: 357-63.                                                                                                                                                                                                                                                                   | Population: Age <60 yrs.            |
| Shigaki, C. L., C. Moore, B. Wakefield, J. Campbell, and J. LeMaster. 2010. 'Nurse partners in chronic illness care: patients' perceptions and their implications for nursing leadership', <i>Nursing administration quarterly</i> , 34: 130-40.                                                                                                                                                 | Outcome: Preferences not addressed  |
| Shigemura, J., Y. Sato, A. Yoshino, and S. Nomura. 2008. 'Patient satisfaction with antidepressants: An Internet-based study', <i>Journal of Affective Disorders</i> , 107: 155-60.                                                                                                                                                                                                              | Population: Age <60 yrs.            |
| Sierra, J. A. I., and S. M. Calderon. 1997. 'Health and social services: Needs, preferences and their use by the elderly following hospitalisation. [Spanish]', <i>Revista Espanola de Salud Publica</i> , 71: 281-91.                                                                                                                                                                           | Population: Not multimorbid         |
| Singer, S. J., M. W. Friedberg, M. V. Kiang, T. Dunn, and D. M. Kuhn. 2013. 'Development and preliminary validation of the Patient Perceptions of Integrated Care survey', <i>Medical Care Research and Review</i> , 70: 143-64.                                                                                                                                                                 | Population: Age <60 yrs.            |
| Singh, Jasvinder A., Jeff A. Sloan, Pamela J. Atherton, Tenbroeck Smith, Thomas F. Hack, Mashele M. Huschka, Teresa A. Rummans, Matthew M. Clark, Brent Diekmann, and Lesley F. Degner. 2010. 'Preferred Roles in Treatment Decision Making Among Patients With Cancer: A Pooled Analysis of Studies Using the Control Preferences Scale', <i>American Journal of Managed Care</i> , 16: 688-96. | Document type: Editorials & reviews |
| Siouta, Eleni, Ulla Hellström Muhli, Berith Hedberg, Anders Broström, Björn Fossum, and Klas Karlgren. 2016. 'Patients' experiences of communication and involvement in decision-making about atrial fibrillation treatment in consultations with nurses and physicians', <i>Scandinavian Journal of Caring Sciences</i> , 30: 535-46.                                                           | Population: Not multimorbid         |
| Skaperdas, E., A. Tuepker, C. Nicolaidis, J. K. Robb, D. Kansagara, and D. H. Hickam. 2014. 'Congestive heart failure self-management among US veterans: The role of personal and professional advocates', <i>Patient Educ Couns</i> , 95: 371-7.                                                                                                                                                | Outcome: Preferences not addressed  |
| Skelton, A. M., E. A. Murphy, R. J. L. Murphy, and T. C. O'Dowd. 1996. 'Patients' views of low back pain and its management in general practice', <i>British Journal of General Practice</i> , 46: 153-56.                                                                                                                                                                                       | Population: Age <60 yrs.            |
| Skilbeck, Julie Kathryn, Antony Arthur, and Jane Seymour. 2018. 'Making sense of frailty: An ethnographic study of the experience of older people living with complex health problems', <i>International Journal of Older People Nursing</i> , 13: 1-1.                                                                                                                                          | Outcome: Preferences not addressed  |
| Slightam, C. A., K. Brandt, E. C. Jenchura, E. T. Lewis, S. M. Asch, and D. M. Zulman. 2018. "'I had to change so much in my life to live with my new limitations": Multimorbid patients' descriptions of their most bothersome chronic conditions', <i>Chronic Illness</i> , 14: 13-24.                                                                                                         | Outcome: Preferences not addressed  |

|                                                                                                                                                                                                                                                                                                                                                                                                    |                                       |
|----------------------------------------------------------------------------------------------------------------------------------------------------------------------------------------------------------------------------------------------------------------------------------------------------------------------------------------------------------------------------------------------------|---------------------------------------|
| Snell, R., T. Langran, and P. Donyai. 2017. 'Patient views about polypharmacy medication review clinics run by clinical pharmacists in GP practices', <i>International Journal of Clinical Pharmacy</i> , 39: 1162-65.                                                                                                                                                                             | Outcome: Preferences not addressed    |
| Sobolewska, J., M. Szewczyk, M. Wlodarczyk, A. Sobolewska, J. Kasprzyk, L. Dziki, and A. Dziki. 2015. 'Patient perceptions of physician performing the digital rectal examination', <i>United European Gastroenterology Journal</i> , 1): A583.                                                                                                                                                    | Document type: Conference proceedings |
| Solberg, L. I., S. E. Asche, L. H. Anderson, K. Sepucha, N. M. Thygeson, J. E. Madden, L. Morrissey, and K. K. Kraemer. 2009. 'Evaluating preference-sensitive care for uterine fibroids: It's not so simple', <i>Journal of Women's Health</i> , 18: 1071-79.                                                                                                                                     | Population: Age <60 yrs.              |
| Soto-Perez-de-Celis, E., V. Perez-Montessoro, P. Rojo-Castillo, and Y. Chavarri-Guerra. 2018. 'Correction to: Health-Related Information-Seeking Behaviors and Preferences Among Mexican Patients with Cancer', <i>Journal of cancer education : the official journal of the American Association for Cancer Education</i> , 33: 510.                                                              | Population: Not multimorbid           |
| Sowerbutts, A. M., J. Griffiths, C. Todd, and K. Lavelle. 2015. 'Why are older women not having surgery for breast cancer? A qualitative study', <i>Psycho-Oncology</i> , 24: 1036-42.                                                                                                                                                                                                             | Population: Not multimorbid           |
| Stamm, A. W., J. S. Banerji, E. M. Wolff, A. Slee, S. Akapame, K. Dahl, D. M. John, M. C. Soung, K. R. Pittenger, and J. M. Corman. 2017. 'A decision aid versus shared decision making for prostate cancer screening results of a randomized, controlled trial', <i>Canadian Journal of Urology</i> , 24: 8910-17.                                                                                | Outcome: Preferences not addressed    |
| Stanek, E. J., M. B. Oates, W. F. McGhan, D. Denofrio, and E. Loh. 2000. 'Preferences for treatment outcomes in patients with heart failure: Symptoms versus survival', <i>Journal of Cardiac Failure</i> , 6: 225-32.                                                                                                                                                                             | Population: Age <60 yrs.              |
| Stegmann, M. E., J. Schuling, T. J. N. Hiltermann, A. K. L. Reyners, H. Burger, M. Y. Berger, and A. J. Berendsen. 2017. 'Study protocol for the OPTion randomised controlled trial on the effect of prioritising treatment goals among older patients with cancer in a palliative setting', <i>Maturitas</i> , 96: 84-88.                                                                         | Document type: Study protocols        |
| Sternke, E. A., K. Abrahamson, and M. J. Bair. 2016. 'Comorbid Chronic Pain and Depression: Patient Perspectives on Empathy', <i>Pain management nursing : official journal of the American Society of Pain Management Nurses</i> , 17: 363-71.                                                                                                                                                    | Population: Age <60 yrs.              |
| Stevenson, Lynne W., Anne S. Hellkamp, Carl V. Leier, George Sopko, Todd Koelling, J. Wayne Warnica, William T. Abraham, Edward K. Kasper, Joseph G. Rogers, Robert M. Califf, Elizabeth E. Schramm, and Christopher M. O'Connor. 2008. 'Changing Preferences for Survival After Hospitalization With Advanced Heart Failure', <i>Journal of the American College of Cardiology</i> , 52: 1702-08. | Population: Age <60 yrs.              |
| Stewart, M., M. Fortin, and Team Patient-Centred Innovations for Persons with Multimorbidity. 2017. 'Patient-Centred Innovations for Persons with Multimorbidity: funded evaluation protocol', <i>CMAJ open</i> , 5: E365-E72.                                                                                                                                                                     | Document type: Study protocols        |
| Stone, S. C., S. A. Mohanty, and C. D. McClung. 2010. 'Treatment preferences: Impact of risk and benefit in decision-making', <i>Journal of Palliative Medicine</i> , 13: 39-47.                                                                                                                                                                                                                   | Population: Age <60 yrs.              |

|                                                                                                                                                                                                                                                                                                                              |                                                    |
|------------------------------------------------------------------------------------------------------------------------------------------------------------------------------------------------------------------------------------------------------------------------------------------------------------------------------|----------------------------------------------------|
| Straand, J., and H. Sandvik. 2001. 'Stopping long-term drug therapy in general practice. How well do physicians and patients agree?', <i>Family Practice</i> , 18: 597-601.                                                                                                                                                  | Outcome: Preferences not addressed                 |
| Straton, J. B., N. Y. Wang, L. A. Meoni, D. E. Ford, M. J. Klag, D. Casarett, and J. J. Gallo. 2004. 'Physical functioning, depression, and preferences for treatment at the end of life: the Johns Hopkins Precursors Study', <i>Journal of the American Geriatrics Society</i> , 52: 577-82.                               | Outcome: Preferences from physicians or caregivers |
| Street, H., M. O'Connor, and H. Robinson. 2007. 'Depression in older adults: exploring the relationship between goal setting and physical health', <i>International Journal of Geriatric Psychiatry</i> , 22: 1115-9.                                                                                                        | Outcome: Preferences not addressed                 |
| Sturgeon, K. M., C. Fisher, G. McShea, S. K. Sullivan, D. Sataloff, and K. H. Schmitz. 2018. 'Patient preference and timing for exercise in breast cancer care', <i>Supportive Care in Cancer</i> , 26: 507-14.                                                                                                              | Population: Age <60 yrs.                           |
| Subramanian, L., M. Quinn, J. Zhao, L. Lachance, J. Zee, and F. Tentori. 2017. 'Coping with kidney disease - qualitative findings from the Empowering Patients on Choices for Renal Replacement Therapy (EPOCH-RRT) study', <i>BMC Nephrology</i> , 18 (1) (no pagination).                                                  | Outcome: Preferences not addressed                 |
| <a href="https://ClinicalTrials.gov/show/NCT03525015">Sun Yat-sen, University. 2018. "Impact of a Printed Decision Aid on Cataract Surgery Choice." In.: https://ClinicalTrials.gov/show/NCT03525015.</a>                                                                                                                    | Population: Not multimorbid                        |
| Taheri, C., P. Panchal, T. Kakkar, N. Pattathil, and C. Kreatsoulas. 2016. 'Patient perspectives on cardiac care experiences differ according to gender', <i>Circulation</i> . Conference: American Heart Association's, 134.                                                                                                | Document type: Conference proceedings              |
| Tai, W. T., F. W. Porell, and E. K. Adams. 2004. 'Hospital choice of rural Medicare beneficiaries: patient, hospital attributes, and the patient-physician relationship', <i>Health Services Research</i> , 39: 1903-22.                                                                                                     | Population: Not multimorbid                        |
| Takahara, M., T. Shiraiwa, N. Ogawa, M. Yamamoto, Y. Kusuda, M. Shindo, S. Hashio, N. Katakami, T. A. Matsuoka, and I. Shimomura. 2017. 'Patient perspectives on combination therapy of a once-weekly oral medication plus daily medication for lifestyle-related chronic diseases', <i>Internal Medicine</i> , 56: 615-20.  | Outcome: Preferences not addressed                 |
| Tamura, M. K., J. C. Tan, and A. M. O'Hare. 2012. 'Optimizing renal replacement therapy in older adults: A framework for making individualized decisions', <i>Kidney International</i> , 82: 261-69.                                                                                                                         | Document type: Editorials & reviews                |
| Tang, S. T., F. H. Wen, W. C. Chang, C. H. Hsieh, W. C. Chou, J. S. Chen, and M. M. Hou. 2017. 'Preferences for Life-Sustaining Treatments Examined by Hidden Markov Modeling Are Mostly Stable in Terminally Ill Cancer Patients' Last Six Months of Life', <i>Journal of Pain and Symptom Management</i> , 54: 628-+.      | Population: Age <60 yrs.                           |
| Tattersall, M. H. N., L. Venkateswaran, and G. Szonyi. 2012. 'Are age and self-reported health predictors of older incurable cancer patients' preferences for involvement in decisions about palliative chemotherapy and for receiving prognostic information?', <i>Asia-Pacific Journal of Clinical Oncology</i> , 3): 127. | Document type: Conference proceedings              |
| Taylor L.M., J. C. Spence, K. Raine, A. M. Sharma and R. C. Plotnikoff Self-reported physical activity preferences in individuals with prediabetes. <i>The Physician and Sportsmedicine</i> , 39:2, 41-49                                                                                                                    | Population: Age <60 yrs.                           |

|                                                                                                                                                                                                                                                                                                                                                                                     |                                     |
|-------------------------------------------------------------------------------------------------------------------------------------------------------------------------------------------------------------------------------------------------------------------------------------------------------------------------------------------------------------------------------------|-------------------------------------|
| Theile, G., and C. A. Muller. 2012. '[Multimorbid general practice patients - what's really important?]', <i>Praxis</i> , 101: 1621-6.                                                                                                                                                                                                                                              | Document type: Editorials & reviews |
| Thiem, U., G. Theile, U. Junius-Walker, S. Holt, P. Thurmann, T. Hinrichs, P. Platen, C. Diederichs, K. Berger, J. M. Hodek, W. Greiner, S. Berkemeyer, L. Pientka, and H. J. Trampisch. 2011. 'Prerequisites for a new health care model for elderly people with multimorbidity: the PRISCUS research consortium', <i>Zeitschrift fur Gerontologie und Geriatrie</i> , 44: 115-20. | Outcome: Preferences not addressed  |
| Thomson, R. G., M. P. Eccles, I. N. Steen, Jrtsju Scheme, L. Stobbart, M. J. Murtagh, and C. R. May. 2007. 'A patient decision aid to support shared decision-making on anti-thrombotic treatment of patients with atrial fibrillation: randomised controlled trial', <i>Quality &amp; Safety in Health Care</i> , 16: 216-23.                                                      | Population: Not multimorbid         |
| Thorne, Sally, John L. Oliffe, and Kelli I. Stajduhar. 2013. 'Communicating shared decision-making: Cancer patient perspectives', <i>Patient Education and Counseling</i> , 90: 291-96.                                                                                                                                                                                             | Population: Not multimorbid         |
| Tickle, June. 2016. 'Relationships between advance care planning preferences, symptoms, and place of death in older adults with chronic lung disease', <i>Relationships Between Advance Care Planning Preferences, Symptoms &amp; Place of Death in Older Adults with Chronic Lung Disease</i> : 1-1.                                                                               | No full-text available              |
| Tierney, S., H. Elwers, C. Sange, M. Mamas, M. K. Rutter, M. Gibson, L. Neyses, and C. Deaton. 2011. 'What influences physical activity in people with heart failure?: a qualitative study', <i>Int J Nurs Stud</i> , 48: 1234-43.                                                                                                                                                  | Document type: Editorials & reviews |
| Timpel, P., C. Lang, J. Wens, J. C. Contel, A. Gilis-Januszewska, K. Kemple, P. E. Schwarz, and Grp Manage Care Study. 2017. 'Individualising Chronic Care Management by Analysing Patients' Needs - A Mixed Method Approach', <i>International Journal of Integrated Care</i> , 17: 12.                                                                                            | Population: Age <60 yrs.            |
| Tinetti, M. E., J. Esterson, R. Ferris, P. Posner, and C. S. Blaum. 2016. 'Patient Priority-Directed Decision Making and Care for Older Adults with Multiple Chronic Conditions', <i>Clinics in Geriatric Medicine</i> , 32: 261-75.                                                                                                                                                | Document type: Editorials & reviews |
| Tinsel, I., A. Buchholz, W. Vach, A. Siegel, T. Durk, A. Buchholz, W. Niebling, and K. G. Fischer. 2013. 'Shared decision-making in antihypertensive therapy: a cluster randomised controlled trial', <i>BMC Family Practice</i> , 14: 135.                                                                                                                                         | Population: Not multimorbid         |
| Tomasovic Mrcela, N., J. A. Borovac, D. Vrdoljak, S. Grazio, A. Tikvica Luetic, and S. Tomek-Roksandic. 2015. 'When elders choose: Which factors could influence the decision-making among elderly in the selection of health tourism services?', <i>Medical Hypotheses</i> , 85: 898-904.                                                                                          | Document type: Editorials & reviews |
| Tong, A., P. Sainsbury, S. Chadban, R. G. Walker, D. C. Harris, S. M. Carter, B. Hall, C. Hawley, and J. C. Craig. 2009. 'Patients' experiences and perspectives of living with CKD', <i>American Journal of Kidney Diseases</i> , 53: 689-700.                                                                                                                                     | Population: Age <60 yrs.            |
| Tong, A., S. Jan, G. Wong, J. C. Craig, M. Irving, S. Chadban, A. Cass, N. Marren, and K. Howard. 2012. 'Patient preferences for the allocation of deceased donor kidneys for transplantation: A mixed methods study', <i>BMC Nephrology</i> , 13 (1) (no pagination).                                                                                                              | Population: Age <60 yrs.            |
| Topaz, Maxim. 2014. 'Developing a tool to support decisions on patient prioritization at admission to home health care', Ph.D.: 191 p-91 p.                                                                                                                                                                                                                                         | Outcome: Preferences not addressed  |

|                                                                                                                                                                                                                                                                                                                                         |                                       |
|-----------------------------------------------------------------------------------------------------------------------------------------------------------------------------------------------------------------------------------------------------------------------------------------------------------------------------------------|---------------------------------------|
| Tordoff, J., K. Simonsen, W. M. Thomson, and P. T. Norris. 2010. "'It's just routine.'" A qualitative study of medicine-taking amongst older people in New Zealand', <i>Pharm World Sci</i> , 32: 154-61.                                                                                                                               | Outcome: Preferences not addressed    |
| Townsend, A., P. Adam, L. C. Li, M. McDonald, and C. L. Backman. 2013. 'Exploring eHealth Ethics and Multi-Morbidity: Protocol for an Interview and Focus Group Study of Patient and Health Care Provider Views and Experiences of Using Digital Media for Health Purposes', <i>JMIR Research Protocols</i> , 2: e38.                   | Document type: Study protocols        |
| Uldry, Emilie, Markus Schaefer, Alend Saadi, Valentin Rousson, and Nicolas Demartines. 2013. 'Patients' Preferences on Information and Involvement in Decision Making for Gastrointestinal Surgery', <i>World Journal of Surgery</i> , 37: 2162-71.                                                                                     | Population: Age <60 yrs.              |
| Valaker, Irene, Maj-Britt Råholm, Tone M. Norekvål, Svein Rotevatn, Bengt Fridlund, and Jan Erik Nordrehaug. 2017. 'Continuity of care after percutaneous coronary intervention: The patient's perspective across secondary and primary care settings', <i>European Journal of Cardiovascular Nursing</i> , 16: 444-52.                 | Population: Not multimorbid           |
| Van De Pol, M. H. J., C. R. M. G. Fluit, J. Lagro, D. Niessen, M. G. M. O. Rikkert, and A. L. M. Lagro-Janssen. 2015. 'Quality care provision for older people: An interview study with patients and primary healthcare professionals', <i>British Journal of General Practice</i> , 65: e500-e07.                                      | Population: Not multimorbid           |
| van de Pol, M. H. J., C. R. M. G. Fluit, J. Lagro, Y. H. P. Slaats, M. G. M. Olde Rikkert, and A. L. M. Lagro-Janssen. 2016. 'Expert and patient consensus on a dynamic model for shared decision-making in frail older patients', <i>Patient Education and Counseling</i> , 99: 1069-77.                                               | Outcome: Preferences not addressed    |
| van der Aa, M. J., J. R. van den Broeke, K. Stronks, and T. Plochg. 2017. 'Patients with multimorbidity and their experiences with the healthcare process: a scoping review', <i>J Comorb</i> , 7: 11-21.                                                                                                                               | Document type: Editorials & reviews   |
| van Dongen, J. J. J., M. de Wit, H. W. H. Smeets, E. Stoffers, M. A. van Bokhoven, and R. Daniels. 2017. "'They Are Talking About Me, but Not with Me": A Focus Group Study to Explore the Patient Perspective on Interprofessional Team Meetings in Primary Care', <i>Patient</i> , 10: 429-38.                                        | Population: Not multimorbid           |
| van Wijmen, M. P. S., H. R. W. Pasman, G. A. M. Widdershoven, and B. D. Onwuteaka-Philipsen. 2015. 'Continuing or forgoing treatment at the end of life? Preferences of the general public and people with an advance directive', <i>Journal of Medical Ethics</i> , 41: 599-606.                                                       | Population: Not multimorbid           |
| Vandermause, R., J. J. Neumiller, B. J. Gates, P. David, M. Altman, D. J. Healey, P. Benson, D. Sunwold, G. Burton, K. R. Tuttle, and C. F. Corbett. 2016. 'Preserving Self: Medication-Taking Practices and Preferences of Older Adults With Multiple Chronic Medical Conditions', <i>Journal of Nursing Scholarship</i> , 48: 533-42. | Outcome: Preferences not addressed    |
| Venkateswaran, L. P., M. Tattersall, G. Szonyi, L. Horvath, N. Wilcken, M. Wong, P. Butow, J. Jansen, and R. Hui. 2009. 'Participation preferences in decision-making in cancer treatment - The 'PREDICT' study', <i>Asia-Pacific Journal of Clinical Oncology</i> , 2): A201-A02.                                                      | Document type: Conference proceedings |
| Vermunt, N. P. C. A., M. Harmsen, G. P. Westert, M. G. M. Olde Rikkert, and M. J. Faber. 2017. 'Collaborative goal setting with elderly patients with chronic disease or multimorbidity: a systematic review', <i>BMC Geriatrics</i> , 17: 167.                                                                                         | Document type: Editorials & reviews   |

|                                                                                                                                                                                                                                                                                                                                                                                            |                                                    |
|--------------------------------------------------------------------------------------------------------------------------------------------------------------------------------------------------------------------------------------------------------------------------------------------------------------------------------------------------------------------------------------------|----------------------------------------------------|
| Vermunt, N. P., M. Harmsen, G. Elwyn, G. P. Westert, J. S. Burgers, M. G. Olde Rikkert, and M. J. Faber. 2018. 'A three-goal model for patients with multimorbidity: A qualitative approach', <i>Health Expectations</i> , 21: 528-38.                                                                                                                                                     | Outcome: Preferences from physicians or caregivers |
| Vermunt, Npca, G. P. Westert, M. G. M. Olde Rikkert, and M. J. Faber. 2018. 'Assessment of goals and priorities in patients with a chronic condition: a secondary quantitative analysis of determinants across 11 countries', <i>Scandinavian journal of primary health care</i> , 36: 80-88.                                                                                              | Outcome: Preferences not addressed                 |
| Vina, E. R., D. Ran, E. L. Ashbeck, M. Kaur, and C. K. Kwoh. 2017. 'Relationship Between Knee Pain and Patient Preferences for Joint Replacement: Health Care Access Matters', <i>Arthritis Care and Research</i> , 69: 95-103.                                                                                                                                                            | Population: Not multimorbid                        |
| Voigt, I., J. Wrede, H. Diederichs-Egidi, M. L. Dierks, E. Hummers-Pradier, and U. Junius-Walker. 2010. 'Prüfcheck: Patientenzentrierte behandlungsplanung mit älteren multimorbiden patienten: Methodik und design. = PrefCheck: Patient-centered treatment planning with older multimorbid patients. Method and design', <i>Zeitschrift für Gerontologie und Geriatrie</i> , 43: 303-09. | Outcome: Preferences not addressed                 |
| Vreugdenhil, G. 2018. 'Shared decision-making in palliative care: desires and facts', <i>Supportive Care in Cancer</i> , 26.                                                                                                                                                                                                                                                               | Document type: Editorials & reviews                |
| Walker, R. C., R. L. Morton, A. Tong, M. R. Marshall, S. Palmer, and K. Howard. 2015. 'Patient and caregiver preferences for home dialysis-the home first study: a protocol for qualitative interviews and discrete choice experiments', <i>BMJ Open</i> , 5: 6.                                                                                                                           | Document type: Study protocols                     |
| Wallner, L. P., Y. Li, A. K. C. Furgal, C. R. Friese, A. S. Hamilton, K. C. Ward, R. Jagsi, S. J. Katz, and S. T. Hawley. 2017. 'Patient preferences for primary care provider roles in breast cancer survivorship care', <i>Journal of Clinical Oncology</i> , 35: 2942-48.                                                                                                               | Population: Not multimorbid                        |
| Ward, L., and J. Draper. 2008. 'A review of the factors involved in older people's decision making with regard to influenza vaccination: A literature review', <i>Journal of Clinical Nursing</i> , 17: 5-16.                                                                                                                                                                              | Outcome: Preferences not addressed                 |
| Washington State, University, and Center Providence Medical Research. 2012. "Medication-taking Preferences & Practices of Patients With Chronic Conditions." In.: <a href="https://ClinicalTrials.gov/show/NCT01614353">https://ClinicalTrials.gov/show/NCT01614353</a> .                                                                                                                  | Ongoing study                                      |
| White, Carolynne, Primrose Lentin, and Louise Farnworth. 2016. 'Multimorbidity and the process of living with ongoing illness', <i>Chronic Illness</i> , 12: 83-97.                                                                                                                                                                                                                        | Population: Age <60 yrs.                           |
| Whitson, H. E., K. Steinhauser, N. Ammarell, D. Whitaker, S. W. Cousins, D. Ansah, L. L. Sanders, and H. J. Cohen. 2011. 'Categorizing the effect of comorbidity: a qualitative study of individuals' experiences in a low-vision rehabilitation program', <i>Journal of the American Geriatrics Society</i> , 59: 1802-9.                                                                 | Outcome: Preferences not addressed                 |
| Wilkinson, C., M. Khanji, P. E. Cotter, O. Dunne, and S. T. O'Keefe. 2008. 'Preferences of acutely ill patients for participation in medical decision-making', <i>Quality &amp; Safety in Health Care</i> , 17: 97-100.                                                                                                                                                                    | Population: Not multimorbid                        |
| Williams, A. 2004. 'Patients with comorbidities: perceptions of acute care services', <i>Journal of Advanced Nursing</i> , 46: 13-22.                                                                                                                                                                                                                                                      | Outcome: Preferences not addressed                 |
| Williams, A., and E. Manias. 2014. 'Exploring motivation and confidence in taking prescribed medicines in coexisting diseases: a qualitative study', <i>J Clin Nurs</i> , 23: 471-81.                                                                                                                                                                                                      | Outcome: Preferences not addressed                 |



|                                                                                                                                                                                                                                                                                                                                                                                                         |                                                    |
|---------------------------------------------------------------------------------------------------------------------------------------------------------------------------------------------------------------------------------------------------------------------------------------------------------------------------------------------------------------------------------------------------------|----------------------------------------------------|
| Williams, B., A. Shaw, R. Durrant, I. Crinson, C. Pagliari, and S. de Lusignan. 2005. 'Patient perspectives on multiple medications versus combined pills: A qualitative study', <i>QJM - Monthly Journal of the Association of Physicians</i> , 98: 885-93.                                                                                                                                            | Outcome: Preferences not addressed                 |
| Wilson, D. M., and S. Birch. 2018. 'A scoping review of research to assess the frequency, types, and reasons for end-of-life care setting transitions', <i>Scand J Public Health</i> : 1403494818785042.                                                                                                                                                                                                | Outcome: Preferences not addressed                 |
| Winter, L., M. P. Lawton, and K. Ruckdeschel. 2003. 'Preferences for prolonging life: A prospect theory approach', <i>International Journal of Aging &amp; Human Development</i> , 56: 155-70.                                                                                                                                                                                                          | Population: Not multimorbid                        |
| Winter, Laraine, and Barbara Parker. 2007. 'Current health and preferences for life-prolonging treatments: An application of prospect theory to end-of-life decision making', <i>Social Science &amp; Medicine</i> , 65: 1695-707.                                                                                                                                                                      | Population: Not multimorbid                        |
| Wittink, M. N., P. Walsh, S. Yilmaz, M. Mendoza, R. L. Street, B. P. Chapman, and P. Duberstein. 2018. 'Patient priorities and the doorknob phenomenon in primary care: Can technology improve disclosure of patient stressors?', <i>Patient Education and Counseling</i> , 101: 214-20.                                                                                                                | Population: Age <60 yrs.                           |
| Woda, A., R. A. Belknap, K. Haglund, M. Sebern, and A. Lawrence. 2015. 'Factors influencing self-care behaviors of African Americans with heart failure: a photovoice project', <i>Heart Lung</i> , 44: 33-8.                                                                                                                                                                                           | Outcome: Preferences not addressed                 |
| Wrede, J., I. Voigt, J. Bleidorn, E. Hummers-Pradier, M. L. Dierks, and U. Junius-Walker. 2013. 'Complex health care decisions with older patients in general practice: Patient-centeredness and prioritization in consultations following a geriatric assessment', <i>Patient Education and Counseling</i> , 90: 54-60.                                                                                | Outcome: Preferences from physicians or caregivers |
| Xu, Y., L. Sudharshan, M. A. Hsu, A. Koenig, J. C. Cappelleri, W. Liu, T. Smith, and M. Pasquale. 2017. 'Patient preferences associated with the use of treatments for psoriatic arthritis: Results of a conjoint analysis', <i>Arthritis and Rheumatology. Conference: American College of Rheumatology/Association of Rheumatology Health Professionals Annual Scientific Meeting, ACR/ARHP</i> , 69. | Population: Not multimorbid                        |
| Xue, A., S. Mincer, K. Domino, and K. Posner. 2015. 'Predictors of control preferences in the pre-anesthesia clinic', <i>Journal of Investigative Medicine</i> , 63 (1): 199.                                                                                                                                                                                                                           | Document type: Conference proceedings              |
| Yi, D., M. Ryan, S. Campbell, A. Elliott, N. Torrance, A. Chambers, M. Johnston, P. Hannaford, and B. H. Smith. 2011. 'Using discrete choice experiments to inform randomised controlled trials: an application to chronic low back pain management in primary care', <i>European Journal of Pain</i> , 15: 531.e1-10.                                                                                  | Population: Age <60 yrs.                           |
| Youssef, A. T., R. Constantino, Z. K. Chaudhary, A. Lee, D. Wiljer, M. Mylopoulos, and S. Sockalingam. 2017. 'Mapping Evidence of Patients' Experiences in Integrated Care Settings: A Protocol for a Scoping Review', <i>BMJ Open</i> , 7: e018311.                                                                                                                                                    | Document type: Study protocols                     |
| Youssef, E., V. Cooper, A. Miners, C. Llewellyn, A. Pollard, M. Lagarde, M. Sachikonye, C. Sabin, C. Foreman, N. Perry, E. Nixon, and M. Fisher. 2016. 'Understanding HIV-positive patients' preferences for healthcare services: A protocol for a discrete choice experiment', <i>BMJ Open</i> , 6 (7) (no pagination).                                                                                | Population: Age <60 yrs.                           |

|                                                                                                                                                                                                                                                                                                                                                                                      |                                       |
|--------------------------------------------------------------------------------------------------------------------------------------------------------------------------------------------------------------------------------------------------------------------------------------------------------------------------------------------------------------------------------------|---------------------------------------|
| Yu, C. H., D. Stacey, J. Sale, S. Hall, D. M. Kaplan, N. Ivers, J. Rezmovitz, F. H. Leung, B. R. Shah, and S. E. Straus. 2014. 'Designing and evaluating an interprofessional shared decision-making and goal-setting decision aid for patients with diabetes in clinical care--systematic decision aid development and study protocol', <i>Implementation science : IS</i> , 9: 16. | Duplicates                            |
| Yu, C. H., N. M. Ivers, D. Stacey, J. Rezmovitz, D. Telner, K. Thorpe, S. Hall, M. Settino, D. M. Kaplan, M. Coons, S. Sodhi, J. Sale, and S. E. Straus. 2015. 'Impact of an interprofessional shared decision-making and goal-setting decision aid for patients with diabetes on decisional conflict--study protocol for a randomized controlled trial', 16: 286.                   | Document type: Study protocols        |
| Zarrin, S., K. Patel, N. Thompson, I. Maravilla, and C. Ritchie. 2017. 'Can't teach an older dog new tricks? : CComparing goal setting and completion among younger and older adults with multiple chronic conditions', <i>Journal of the American Geriatrics Society</i> , 65 (Supplement 1): S216-S17.                                                                             | Document type: Conference proceedings |
| Zijlstra, T. J., S. J. Leenman-Dekker, H. K. E. Oldenhuis, H. E. P. Bosveld, and A. J. Berendsen. 2016. 'Knowledge and preferences regarding cardiopulmonary resuscitation: A survey among older patients', <i>Patient Education and Counseling</i> , 99: 160-63.                                                                                                                    | Population: Not multimorbid           |
