# Supplementary figures and images for: Health-related preferences of older patients with multimorbidity: an evidence map
Source: PubMed Central journal article supplement — BMJ Open. 2019 Dec 15;9(12):e034485. doi: 10.1136/bmjopen-2019-034485 (PMC6924802; doi:10.1136/bmjopen-2019-034485), 2019-12-15

**Figure S1. Number of studies published per year.**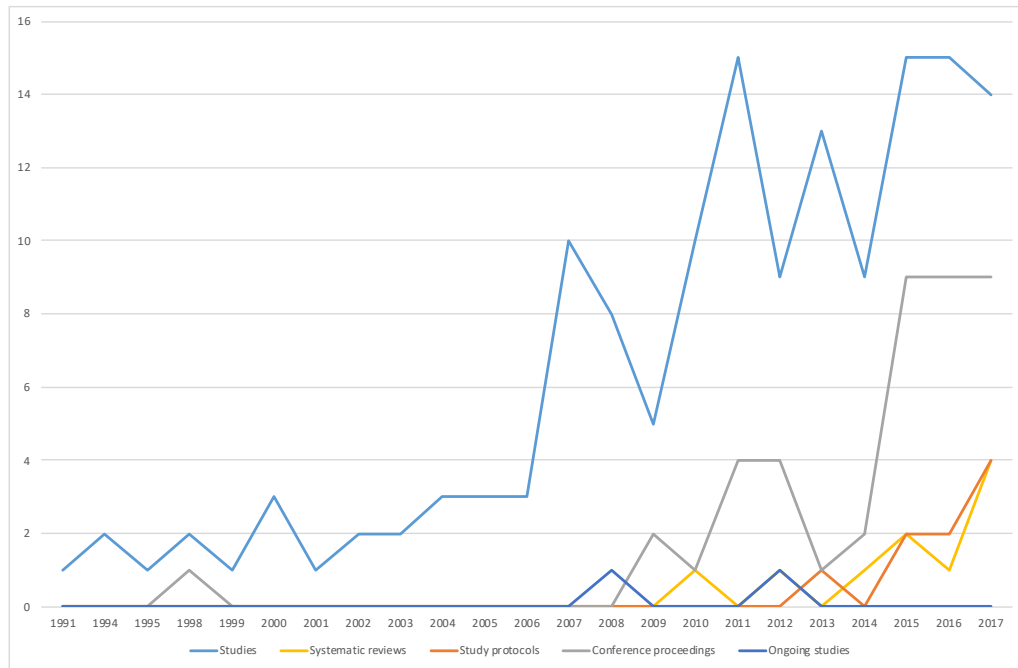

Supplement: bmjopen-2019-034485supp005.pdf [file bmjopen-2019-034485supp005.pdf]
